# Supplementary material for: Metformin use history and genome-wide DNA methylation profile: potential molecular mechanism for aging and longevity
Source: Aging (Albany NY). 2023 Feb 2;15(3):601–16. doi: 10.18632/aging.204498 (PMC9970305; doi:10.18632/aging.204498)
Supplement: Supplementary Table 1 [file aging-15-204498-s001.xlsx]

## Sheet: Supplementary Table 1
Supplementary Table 1. Differential methylation table between metformin users and nonusers regardless of diabetes status.
id	cgid	Chromosome	Start	Strand	mean.0	mean.1	mean.diff	mean.quot.log2	diffmeth.p.val	max.0	min.0	sd.0	max.1	min.1	sd.1	min.diff	diffmeth.p.adj.fdr	combinedRank	num.na.0	num.na.1
613560	cg22769787	chr17	40985300	+	0.155962	0.14309	0.0128724	0.116476	3.37183e-07	0.190811	0.105357	0.0156536	0.172817	0.0957325	0.0188363	0	0.118031	54008	0	0
13607	cg27136384	chr1	22911549	+	0.831855	0.85865	-0.0267953	-0.0452037	4.83896e-07	0.92962	0.715723	0.0373116	0.944758	0.794227	0.0394873	0	0.118031	129397	0	0
629142	cg22163972	chr17	77537086	+	0.920997	0.879234	0.0417627	0.066213	4.88501e-07	0.967935	0.816899	0.0284732	0.945151	0.738629	0.0583922	0	0.118031	82473	0	0
133271	cg23047680	chr3	32989516	+	0.0075373	0.00920492	-0.00166762	-0.131049	9.07961e-07	0.014215	0.00285384	0.00230477	0.0180699	0.0053224	0.00250661	0	0.164535	425569	0	0
547271	cg11341892	chr15	56286143	+	0.0470512	0.0414441	0.0056071	0.149252	2.8242e-06	0.0668511	0.0322646	0.00683753	0.0535385	0.0264026	0.00719259	0	0.409428	174600	0	0
676725	cg11293016	chr19	54402647	+	0.529023	0.489318	0.0397052	0.110388	4.68142e-06	0.776267	0.338426	0.0915401	0.683639	0.302621	0.0871772	0	0.420491	31553	0	0
31774	cg12923877	chr1	70696285	+	0.9748	0.978196	-0.00339595	-0.00496639	4.93719e-06	0.986386	0.956047	0.00627284	0.987993	0.966991	0.00514493	0	0.420491	443042	0	0
61890	cg24353272	chr1	218510204	-	0.952651	0.960329	-0.00767799	-0.0114611	5.16158e-06	0.97606	0.924713	0.0102222	0.975804	0.936605	0.0100643	0	0.420491	310176	0	0
355660	cg07969649	chr8	145814050	-	0.91125	0.927205	-0.0159546	-0.0247713	5.22093e-06	0.946577	0.846731	0.0214593	0.958079	0.88246	0.0140916	0	0.420491	205648	0	0
248041	cg02525926	chr6	28880227	-	0.973928	0.965959	0.00796891	0.0117321	6.97751e-06	0.990496	0.934769	0.00992294	0.986385	0.87589	0.0201776	0	0.480578	306827	0	0
464685	cg23067796	chr12	27967740	-	0.937108	0.920511	0.0165968	0.0255054	7.29297e-06	0.97396	0.855098	0.0222299	0.964428	0.821095	0.0311414	0	0.480578	201861	0	0
68041	cg04573831	chr1	237954741	-	0.966237	0.972357	-0.00611984	-0.00901574	8.10869e-06	0.98505	0.939859	0.00985914	0.984187	0.951491	0.00761156	0	0.483645	346772	0	0
646081	cg15180899	chr18	76536472	+	0.938671	0.921777	0.0168931	0.0259217	8.67398e-06	0.964917	0.864597	0.0173398	0.956309	0.815829	0.0293715	0	0.483645	199776	0	0
163433	cg12222244	chr3	181633701	+	0.941042	0.91974	0.0213025	0.0326825	1.266e-05	0.981111	0.855833	0.0242174	0.959148	0.797781	0.0363957	0	0.528663	170610	0	0
52462	cg20746459	chr1	179520181	-	0.90551	0.870279	0.0352309	0.0566146	1.52122e-05	0.965901	0.778319	0.0368212	0.940701	0.711033	0.0519941	0	0.528663	101064	0	0
441878	cg19586851	chr11	75278281	-	0.971777	0.976836	-0.00505899	-0.00741496	1.55219e-05	0.987077	0.951409	0.00773961	0.985452	0.963234	0.00547389	0	0.528663	377616	0	0
569450	cg12991522	chr16	4986661	+	0.0180894	0.023473	-0.0053836	-0.252972	1.55469e-05	0.0486671	0.00529531	0.00790369	0.0960458	0.00975662	0.0154876	0	0.528663	182099	0	0
358944	cg13567378	chr9	32403106	-	0.890249	0.90369	-0.0134403	-0.0213796	1.7111e-05	0.957761	0.798011	0.0298259	0.952363	0.853982	0.0272562	0	0.528663	224596	0	0
612852	cg24525630	chr17	40202553	+	0.0159612	0.0192433	-0.00328216	-0.171752	1.72482e-05	0.0344272	0.00476839	0.00480416	0.0295199	0.00809176	0.00533194	0	0.528663	281105	0	0
91780	cg20116596	chr2	85486387	-	0.95692	0.96211	-0.0051905	-0.00772379	1.76441e-05	0.975692	0.925903	0.00985104	0.975239	0.947203	0.00806365	0	0.528663	371096	0	0
181281	cg21688687	chr4	55267289	+	0.941326	0.948768	-0.00744107	-0.0112405	1.7971e-05	0.973566	0.906749	0.0138935	0.971208	0.90807	0.0136072	0	0.528663	313089	0	0
57620	cg07980995	chr1	203832396	-	0.981364	0.977468	0.0038959	0.00568072	1.9373e-05	0.995881	0.959714	0.00753084	0.990093	0.947371	0.00950073	0	0.528663	420742	0	0
11828	cg12766383	chr1	19403306	-	0.98546	0.98784	-0.00237982	-0.0034449	1.94367e-05	0.993381	0.97026	0.00431418	0.995681	0.978809	0.00375377	0	0.528663	502350	0	0
413965	cg24038180	chr10	135186854	-	0.0303115	0.0255711	0.00474048	0.180489	1.97103e-05	0.0520235	0.0148419	0.00652779	0.0418894	0.0117226	0.00763726	0	0.528663	206456	0	0
700095	cg07079755	chr20	62710946	+	0.0367982	0.0342476	0.00255061	0.0808542	2.00337e-05	0.0613672	0.0236634	0.00664038	0.0501954	0.0188564	0.00683394	0	0.528663	334880	0	0
93583	cg00358323	chr2	97307693	-	0.948589	0.953109	-0.00451953	-0.006786	2.05336e-05	0.96986	0.916367	0.0100866	0.973407	0.926816	0.0107071	0	0.528663	391765	0	0
236657	cg12188839	chr5	176730610	+	0.0262107	0.0239078	0.00230293	0.0948001	2.09415e-05	0.063718	0.00968309	0.00792315	0.0425963	0.00165255	0.00919979	0	0.528663	357004	0	0
142950	cg14946011	chr3	62189308	+	0.964129	0.969283	-0.0051537	-0.00761256	2.11847e-05	0.980672	0.942631	0.00852228	0.982933	0.94787	0.00883376	0	0.528663	373463	0	0
70654	cg03468249	chr2	290317	-	0.0194342	0.0234727	-0.00403853	-0.185493	2.17025e-05	0.0503654	0.00664843	0.00667262	0.065182	0.0116353	0.00985321	0	0.528663	238136	0	0
698673	cg11394317	chr20	61468685	-	0.959555	0.964605	-0.00504968	-0.00749441	2.188e-05	0.977833	0.932154	0.00902324	0.97979	0.951735	0.0068187	0	0.528663	375950	0	0
33765	cg07168392	chr1	86861658	+	0.0101475	0.0123255	-0.00217801	-0.148093	2.3425e-05	0.0197896	0.00376252	0.0029771	0.024768	0.00626643	0.00391194	0	0.547735	369025	0	0
350107	cg23297661	chr8	131929912	-	0.853198	0.893628	-0.0404299	-0.0660374	2.5662e-05	0.958256	0.568778	0.080166	0.955777	0.759565	0.0451769	0	0.559022	82760	0	0
124030	cg05933219	chr2	240099221	+	0.979346	0.975734	0.00361207	0.00527688	2.62879e-05	0.994957	0.946765	0.00879986	0.989778	0.943822	0.00955359	0	0.559022	432993	0	0
290591	cg20213869	chr7	12624653	-	0.0323484	0.0270549	0.00529358	0.192646	2.69079e-05	0.0824652	0.00896223	0.0146063	0.0679301	0.00935641	0.0120274	0	0.559022	185252	0	0
64431	cg17137740	chr1	227760805	+	0.874192	0.887157	-0.012965	-0.0210007	2.75014e-05	0.934744	0.827149	0.0227946	0.934304	0.851955	0.0224042	0	0.559022	226877	0	0
356714	cg21184111	chr9	4792285	+	0.0193152	0.0228256	-0.00351036	-0.16317	2.77638e-05	0.0363735	0.00642624	0.00627967	0.0435639	0.00950388	0.00786396	0	0.559022	266851	0	0
500906	cg00735454	chr13	44595496	-	0.953885	0.958129	-0.00424365	-0.00633774	2.9356e-05	0.97637	0.919014	0.0100884	0.976824	0.93549	0.0105849	0	0.575104	402875	0	0
253921	cg26884886	chr6	32097857	+	0.103773	0.0946033	0.00916933	0.121225	3.1255e-05	0.136553	0.0660504	0.0129229	0.11891	0.066618	0.0131703	0	0.596194	94703	0	0
14477	cg10654066	chr1	24393149	+	0.940006	0.947418	-0.00741257	-0.0112132	3.52501e-05	0.96079	0.90544	0.0100721	0.968539	0.928611	0.0106024	0	0.606536	313499	0	0
382592	cg08053161	chr10	11497145	+	0.943681	0.949181	-0.00549967	-0.00829581	3.53287e-05	0.975765	0.89845	0.0165792	0.980609	0.916977	0.0156122	0	0.606536	359780	0	0
487063	cg05387247	chr12	117593688	+	0.980106	0.983646	-0.00353948	-0.00514823	3.53593e-05	0.990838	0.957215	0.0063459	0.994939	0.967365	0.00649655	0	0.606536	437037	0	0
304086	cg05356121	chr7	86558910	-	0.928316	0.936126	-0.00780939	-0.0119575	3.66391e-05	0.958198	0.888906	0.015988	0.969744	0.904547	0.0157397	0	0.606536	304020	0	0
706879	cg18151642	chr21	45163611	-	0.948512	0.95287	-0.00435809	-0.00654467	3.6786e-05	0.973257	0.913827	0.0122852	0.969927	0.929893	0.0115483	0	0.606536	397709	0	0
558508	cg19980382	chr15	89164601	-	0.0209825	0.0174853	0.00349724	0.172795	3.68178e-05	0.0420389	0.00974125	0.00577398	0.0284241	0.00716883	0.00524976	0	0.606536	267677	0	0
262066	cg25097480	chr6	45511238	+	0.971947	0.976516	-0.00456879	-0.00669698	3.94048e-05	0.984337	0.955514	0.0059401	0.986275	0.965202	0.00554041	0	0.614348	393923	0	0
342325	cg20333288	chr8	94520572	+	0.955076	0.961877	-0.00680148	-0.0101319	3.9583e-05	0.974532	0.903751	0.0123004	0.979422	0.93916	0.0103916	0	0.614348	328735	0	0
473133	cg09351555	chr12	57006980	-	0.955677	0.961122	-0.00544498	-0.00811181	3.98346e-05	0.970809	0.935131	0.00673974	0.971154	0.948651	0.00629883	0	0.614348	363280	0	0
280644	cg26112621	chr6	160875606	+	0.794392	0.818533	-0.0241406	-0.0426597	4.11933e-05	0.88527	0.616587	0.0492007	0.89232	0.714083	0.0377192	0	0.622067	136847	0	0
351822	cg10722846	chr8	141468634	+	0.0211679	0.0245459	-0.003378	-0.148453	4.34703e-05	0.0477257	0.0069159	0.00686566	0.0356889	0.012674	0.00513935	0	0.640817	274958	0	0
551424	cg23189304	chr15	68305127	+	0.965934	0.969371	-0.00343657	-0.00507126	4.69898e-05	0.981053	0.944437	0.00668659	0.98248	0.953227	0.00785607	0	0.640817	439537	0	0
171266	cg06103218	chr4	2073751	-	0.934315	0.915158	0.0191572	0.0295687	5.02711e-05	0.976713	0.821668	0.0248324	0.968368	0.803182	0.0376555	0	0.640817	183323	0	0
623160	cg15247839	chr17	65581912	+	0.983281	0.984997	-0.0017156	-0.00248968	5.05423e-05	0.99057	0.970962	0.00382415	0.991369	0.978156	0.00347752	0	0.640817	551108	0	0
505798	cg12693049	chr13	89719849	+	0.290782	0.257595	0.0331871	0.168668	5.08689e-05	0.523846	0.10637	0.0777899	0.395504	0.0932822	0.0779575	0	0.640817	9310	0	0
13926	cg11811391	chr1	23520083	-	0.965709	0.969142	-0.0034325	-0.00506643	5.18386e-05	0.981465	0.950983	0.00640504	0.981473	0.954004	0.0065991	0	0.640817	439713	0	0
222515	cg14645481	chr5	130501199	-	0.0092282	0.0118776	-0.00264945	-0.186234	5.2172e-05	0.0232129	0.00263615	0.0037051	0.0289053	0.00505842	0.00496312	0	0.640817	326771	0	0
537930	cg19740964	chr14	105685075	+	0.940312	0.946203	-0.00589114	-0.0089159	5.40589e-05	0.959798	0.90854	0.0118369	0.968039	0.926196	0.0106887	0	0.640817	348531	0	0
50008	cg06573636	chr1	167870100	+	0.964977	0.970234	-0.00525716	-0.00775824	5.48419e-05	0.986948	0.940239	0.0106221	0.989195	0.949625	0.0104683	0	0.640817	370383	0	0
522507	cg01273287	chr14	62228901	-	0.00884561	0.0117666	-0.00292099	-0.207888	5.62498e-05	0.0161832	0.00334805	0.00300915	0.0190661	0.00518063	0.00337907	0	0.640817	305804	0	0
520080	cg20219378	chr14	53635666	+	0.933792	0.938658	-0.00486591	-0.007419	5.68567e-05	0.961087	0.903097	0.0124082	0.960128	0.917524	0.0114215	0	0.640817	377535	0	0
71259	cg14108581	chr2	1426094	-	0.895718	0.910931	-0.0152132	-0.0240315	5.89865e-05	0.945961	0.786293	0.027974	0.938877	0.87281	0.0192722	0	0.640817	209459	0	0
311870	cg09070142	chr7	121532396	+	0.829028	0.875056	-0.0460278	-0.0770494	5.92778e-05	0.920343	0.656554	0.0559445	0.944342	0.768216	0.0433003	0	0.640817	65342	0	0
118587	cg20349231	chr2	224085990	+	0.869673	0.882034	-0.0123611	-0.0201315	6.28561e-05	0.919751	0.816652	0.024884	0.931458	0.845434	0.0233197	0	0.640817	232352	0	0
203581	cg04947196	chr5	5354038	+	0.781359	0.818219	-0.0368601	-0.0656801	6.34877e-05	0.919282	0.515244	0.0875689	0.945402	0.714095	0.0577955	0	0.640817	83366	0	0
126995	cg05165710	chr3	4928959	-	0.949917	0.955025	-0.00510796	-0.00765658	6.38079e-05	0.972584	0.926179	0.0104572	0.971912	0.933092	0.0102804	0	0.640817	372512	0	0
35941	cg03123541	chr1	95699097	+	0.465236	0.397318	0.0679175	0.222487	6.39101e-05	0.768496	0.19046	0.112531	0.644228	0.165783	0.107113	0	0.640817	3275	0	0
445162	cg27164575	chr11	94199768	+	0.968681	0.972539	-0.00385805	-0.00567605	6.40454e-05	0.985291	0.946298	0.00777607	0.988125	0.956687	0.00807211	0	0.640817	420888	0	0
419937	cg01084239	chr11	8102510	-	0.0311126	0.0243354	0.00677723	0.259885	6.69638e-05	0.0820021	0.0105243	0.0132174	0.0473133	0.0077444	0.0109538	0	0.640817	141237	0	0
43836	cg13091627	chr1	153518476	+	0.199954	0.17271	0.0272443	0.20052	6.93472e-05	0.315321	0.133266	0.0386119	0.230598	0.129305	0.026213	0	0.640817	8737	0	0
670351	cg05287953	chr19	45258894	-	0.966044	0.971957	-0.00591345	-0.00871433	6.9825e-05	0.983534	0.945747	0.00813097	0.985241	0.952527	0.00789569	0	0.640817	352053	0	0
296232	cg11845241	chr7	36960377	-	0.976993	0.974309	0.00268364	0.00392804	6.9917e-05	0.989128	0.958021	0.00647879	0.986161	0.953247	0.00853911	0	0.640817	481296	0	0
3189	cg19866637	chr1	3057893	+	0.915343	0.927213	-0.0118698	-0.0183883	7.0642e-05	0.956984	0.840542	0.0245539	0.963232	0.87362	0.023236	0	0.640817	244057	0	0
332491	cg12669266	chr8	33342187	-	0.0155128	0.0122334	0.00327943	0.198494	7.22783e-05	0.0287261	0.00754231	0.00435318	0.0204685	0.0054356	0.00407913	0	0.640817	281264	0	0
614522	cg06986705	chr17	42296288	+	0.03055	0.0276733	0.00287664	0.106157	7.36268e-05	0.0464567	0.0171062	0.00594708	0.0437353	0.016207	0.00663596	0	0.640817	309080	0	0
237198	cg21067654	chr5	177580340	+	0.0413759	0.0553711	-0.0139952	-0.347561	7.41288e-05	0.110569	0.0175459	0.015313	0.149452	0.0221872	0.0264142	0	0.640817	45879	0	0
281903	cg03481110	chr6	166884017	-	0.941808	0.94798	-0.00617191	-0.00932482	7.41879e-05	0.964807	0.906899	0.0105127	0.967336	0.922783	0.0112285	0	0.640817	341551	0	0
247580	cg10372721	chr6	28483092	+	0.899433	0.862414	0.0370199	0.0599558	7.44687e-05	0.973496	0.638492	0.0651762	0.952007	0.658968	0.0831957	0	0.640817	94159	0	0
167304	cg03765423	chr3	194014481	-	0.611031	0.574945	0.0360856	0.0863633	7.61154e-05	0.818046	0.3812	0.0809808	0.728325	0.393831	0.0847308	0	0.640817	53369	0	0
552194	cg25069665	chr15	70131034	-	0.942726	0.95121	-0.00848425	-0.0127907	7.78653e-05	0.972875	0.862788	0.0185788	0.981476	0.901629	0.0157192	0	0.640817	294315	0	0
35940	cg26537280	chr1	95699037	-	0.328562	0.280555	0.0480077	0.220612	7.8692e-05	0.597356	0.134086	0.0882343	0.458475	0.143371	0.0715202	0	0.640817	3401	0	0
721805	cg06575572	chr22	45705265	+	0.15146	0.128045	0.0234155	0.226043	7.98524e-05	0.279668	0.0480223	0.0559109	0.246845	0.0432396	0.0544708	0	0.640817	13495	0	0
1092	cg04897188	chr1	1363291	+	0.0474495	0.0525032	-0.00505379	-0.121638	8.04335e-05	0.0852552	0.0200721	0.0129905	0.0845393	0.0255655	0.0146453	0	0.640817	194059	0	0
568215	cg21433313	chr16	3507492	+	0.0489572	0.0343134	0.0146437	0.411923	8.10286e-05	0.121484	0.0139246	0.0249465	0.0757268	0.0171418	0.0142716	0	0.640817	41857	0	0
683352	cg00149716	chr20	13200069	-	0.259151	0.307981	-0.0488296	-0.240523	8.16362e-05	0.484168	0.141374	0.0621448	0.506003	0.215175	0.0700479	0	0.640817	2358	0	0
282872	cg08314980	chr6	168609640	-	0.784482	0.798165	-0.0136827	-0.0246349	8.33845e-05	0.874778	0.671285	0.0379801	0.889067	0.700163	0.0374188	0	0.640817	206356	0	0
178250	cg02564761	chr4	37246054	+	0.121043	0.10052	0.0205223	0.245724	8.3646e-05	0.346401	0.049319	0.0588575	0.194519	0.0465632	0.0347777	0	0.640817	19204	0	0
116648	cg07331752	chr2	219049835	+	0.961887	0.953308	0.00857962	0.0127924	8.59948e-05	0.982966	0.932008	0.0119805	0.979147	0.876448	0.0197631	0	0.640817	294288	0	0
620372	cg14398214	chr17	56493260	-	0.944747	0.952639	-0.00789236	-0.0118769	8.60517e-05	0.97114	0.900458	0.0124312	0.97275	0.931364	0.0101533	0	0.640817	305009	0	0
84978	cg13724732	chr2	53731598	+	0.794981	0.769503	0.0254777	0.0463996	8.84149e-05	0.887516	0.608904	0.0534161	0.871018	0.590122	0.0616905	0	0.640817	126061	0	0
100904	cg21711196	chr2	129325992	+	0.926492	0.934943	-0.00845064	-0.0129601	8.97713e-05	0.961983	0.864645	0.0175387	0.968114	0.883613	0.0189647	0	0.640817	292410	0	0
708369	cg06458679	chr21	46974866	+	0.0806553	0.0739677	0.00668752	0.110556	9.03558e-05	0.101416	0.0546317	0.0092076	0.0978669	0.0463912	0.0127073	0	0.640817	143462	0	0
317393	cg11908531	chr7	144100630	+	0.957589	0.961342	-0.00375293	-0.00558487	9.06059e-05	0.975171	0.939571	0.00735255	0.975698	0.938976	0.00920132	0	0.640817	423600	0	0
71079	cg09581060	chr2	928673	-	0.798115	0.737119	0.0609956	0.113222	9.07881e-05	0.918393	0.547422	0.0752381	0.897505	0.536062	0.0786599	0	0.640817	29681	0	0
569033	cg03391318	chr16	4511917	-	0.957221	0.961569	-0.00434804	-0.00647095	9.1565e-05	0.974101	0.93527	0.007582	0.975909	0.941788	0.00843157	0	0.640817	399528	0	0
638008	cg18242219	chr18	23666144	+	0.937355	0.942301	-0.00494587	-0.00751231	9.29556e-05	0.962365	0.900238	0.0134001	0.965412	0.914303	0.0138702	0	0.640817	375560	0	0
708208	cg06021425	chr21	46831284	-	0.926754	0.935227	-0.00847364	-0.0129916	9.39787e-05	0.960075	0.882439	0.0169024	0.958294	0.899643	0.0150109	0	0.640817	292069	0	0
439949	cg00244679	chr11	71036280	+	0.943281	0.947422	-0.004141	-0.00625342	9.4052e-05	0.962443	0.893053	0.0108256	0.968244	0.923853	0.0115586	0	0.640817	405050	0	0
224042	cg00549234	chr5	134097890	+	0.956164	0.948244	0.00792041	0.0118757	9.69901e-05	0.97762	0.926231	0.0100817	0.967326	0.913588	0.012478	0	0.640817	305031	0	0
176692	cg19144897	chr4	18595299	+	0.0310998	0.0349739	-0.0038741	-0.129957	9.75301e-05	0.0589553	0.0117295	0.00943225	0.0559884	0.0188458	0.00814471	0	0.640817	246464	0	0
544906	cg02550961	chr15	45406866	+	0.0161565	0.0182415	-0.002085	-0.110647	9.92843e-05	0.0442469	0.00546907	0.00641082	0.0319409	0.00755329	0.00591936	0	0.640817	378413	0	0
562393	cg15911339	chr15	100923990	-	0.425421	0.465971	-0.0405501	-0.128463	0.000100837	0.608168	0.198015	0.0856388	0.62342	0.29893	0.0959881	0	0.640817	21504	0	0
220481	cg25450450	chr5	115911947	-	0.00953156	0.0119359	-0.00240432	-0.167485	0.000102214	0.0158945	0.0047897	0.00234298	0.0212088	0.00625785	0.00378151	0	0.640817	347500	0	0
12307	cg10812684	chr1	20251013	+	0.889172	0.873565	0.0156075	0.0252616	0.000102248	0.940763	0.819971	0.0277597	0.932297	0.795022	0.033032	0	0.640817	203083	0	0
231907	cg05962755	chr5	157440814	-	0.910834	0.932042	-0.0212088	-0.0328516	0.000103341	0.971076	0.761721	0.0398607	0.973768	0.852328	0.0282924	0	0.640817	169947	0	0
501936	cg26076960	chr13	48669388	+	0.0346967	0.0385634	-0.00386672	-0.119702	0.000104464	0.0520937	0.0213058	0.00626139	0.055401	0.0269496	0.00714258	0	0.640817	246848	0	0
122327	cg05873085	chr2	237010312	+	0.961972	0.966167	-0.00419534	-0.00621373	0.000105112	0.980777	0.934059	0.00877676	0.98516	0.947724	0.00877757	0	0.640817	406132	0	0
462677	cg05214546	chr12	15941507	-	0.0111557	0.0138141	-0.00265843	-0.170772	0.000106511	0.0189821	0.00353566	0.00376493	0.0235	0.00652257	0.00430939	0	0.640817	326011	0	0
500024	cg03753320	chr13	40768855	+	0.94509	0.953883	-0.00879255	-0.0132207	0.00010723	0.979723	0.900009	0.0147645	0.97705	0.926808	0.0126282	0	0.640817	289509	0	0
366326	cg14242714	chr9	102783481	+	0.960239	0.965533	-0.00529368	-0.00785004	0.000108423	0.978386	0.930055	0.01003	0.986382	0.948183	0.0101262	0	0.640817	368422	0	0
85219	cg04652957	chr2	54785375	+	0.0305214	0.0262254	0.00429606	0.161685	0.000109407	0.0447409	0.0173744	0.00551021	0.037929	0.0178566	0.00489115	0	0.640817	225668	0	0
531362	cg03535253	chr14	93706571	+	0.957143	0.959097	-0.00195416	-0.0029121	0.000109603	0.977742	0.920717	0.0114761	0.976722	0.932246	0.0110278	0	0.640817	528270	0	0
510769	cg10884507	chr13	112820999	+	0.94133	0.920404	0.0209264	0.0320891	0.000109995	0.984289	0.783101	0.03949	0.976005	0.769378	0.0516525	0	0.640817	172942	0	0
60475	cg19376223	chr1	211808399	-	0.969772	0.972751	-0.00297951	-0.00438061	0.000112133	0.991733	0.816224	0.0163223	0.994309	0.948921	0.0105348	0	0.640817	463626	0	0
103484	cg26782884	chr2	148804219	-	0.969011	0.973081	-0.00407019	-0.0059855	0.000113507	0.982021	0.950985	0.00691418	0.985021	0.958045	0.00679942	0	0.640817	412158	0	0
285377	cg25337795	chr7	1015166	-	0.0107707	0.0126385	-0.00186781	-0.124229	0.000115344	0.0283541	0.00257152	0.00474748	0.0262578	0.00476995	0.00498194	0	0.640817	401657	0	0
411488	cg18601466	chr10	132582190	-	0.868272	0.885404	-0.0171316	-0.0278702	0.000116366	0.943708	0.693395	0.044124	0.945528	0.810097	0.0275202	0	0.640817	190654	0	0
240844	cg19137726	chr6	4082055	-	0.867445	0.844104	0.0233413	0.0388975	0.000116638	0.945514	0.736469	0.0448111	0.926375	0.728793	0.0565458	0	0.640817	148565	0	0
396534	cg05746872	chr10	80331643	+	0.919977	0.927158	-0.00718036	-0.0110963	0.000117975	0.955904	0.873138	0.01725	0.957112	0.888159	0.01887	0	0.640817	315054	0	0
122941	cg07053536	chr2	238439517	+	0.923783	0.931608	-0.00782454	-0.0120385	0.000119192	0.958283	0.88986	0.0152633	0.954223	0.907332	0.0114116	0	0.640817	303023	0	0
398103	cg23170988	chr10	88720216	-	0.513188	0.490284	0.0229043	0.0645829	0.000119195	0.728252	0.325481	0.0717838	0.612255	0.335972	0.0739935	0	0.640817	85281	0	0
311291	cg15376461	chr7	116593767	-	0.0342015	0.0378137	-0.00361222	-0.113329	0.000120912	0.0615645	0.0132399	0.0100252	0.0662783	0.0203629	0.0103418	0	0.640817	260968	0	0
430022	cg15240320	chr11	56141839	+	0.930229	0.916833	0.0133961	0.0207029	0.000122307	0.9713	0.824705	0.0249781	0.952286	0.812044	0.0335353	0	0.640817	228738	0	0
310159	cg23132139	chr7	107719878	-	0.963736	0.971109	-0.00737257	-0.0108821	0.000124787	0.985087	0.938448	0.00965538	0.987034	0.946323	0.00937403	0	0.640817	317910	0	0
135119	cg26463342	chr3	41935976	-	0.940421	0.945154	-0.00473349	-0.00716738	0.000126831	0.966728	0.887688	0.0130314	0.97116	0.921116	0.0104749	0	0.640817	382984	0	0
566339	cg22220565	chr16	2026914	+	0.906932	0.91845	-0.0115181	-0.0180096	0.000126954	0.95051	0.851309	0.0188327	0.945609	0.860665	0.0192314	0	0.640817	246785	0	0
44212	cg12464233	chr1	153940377	-	0.0143564	0.0167855	-0.00242907	-0.137149	0.000127764	0.0240698	0.00753627	0.00401666	0.0349308	0.00785374	0.00568143	0	0.640817	345337	0	0
568521	cg01963870	chr16	3790368	-	0.974596	0.97645	-0.00185425	-0.00271441	0.00013014	0.98671	0.960748	0.00583095	0.986816	0.96366	0.0065687	0	0.640817	538667	0	0
340687	cg02368089	chr8	80880022	+	0.972707	0.976441	-0.00373386	-0.00547122	0.000130435	0.988672	0.952682	0.00755936	0.988926	0.965079	0.00542527	0	0.640817	427016	0	0
123916	cg20854286	chr2	240019466	-	0.927533	0.937389	-0.00985557	-0.0150868	0.000130501	0.956565	0.889497	0.0150081	0.959072	0.913387	0.0122807	0	0.640817	271005	0	0
336536	cg13599734	chr8	55479004	-	0.268219	0.248307	0.0199118	0.107133	0.000131298	0.41254	0.148584	0.0465063	0.331055	0.124952	0.05937	0	0.640817	33857	0	0
157388	cg25407617	chr3	147016549	-	0.389369	0.330868	0.0585004	0.228507	0.000131461	0.631535	0.130638	0.104966	0.572704	0.123103	0.106748	0	0.640817	2916	0	0
92924	cg17621618	chr2	89267667	+	0.944596	0.950432	-0.00583625	-0.00879355	0.000133136	0.966909	0.898964	0.0104835	0.971743	0.91889	0.0118755	0	0.640817	350647	0	0
134229	cg17044320	chr3	38180096	-	0.0188386	0.0174506	0.00138804	0.0711656	0.000133395	0.0310315	0.00735455	0.00481492	0.028006	0.0074995	0.00557697	0	0.640817	462454	0	0
360354	cg06272555	chr9	36862435	+	0.374225	0.348389	0.0258354	0.100423	0.000134164	0.516694	0.193461	0.0689013	0.477815	0.202785	0.068	0	0.640817	39285	0	0
527777	cg12951526	chr14	77004745	-	0.947616	0.951717	-0.00410135	-0.00616569	0.000134228	0.973925	0.898911	0.0127606	0.979226	0.919019	0.0136721	0	0.640817	407376	0	0
646422	cg05753993	chr18	77199432	-	0.331064	0.302969	0.0280946	0.124021	0.000134754	0.444594	0.257345	0.0400154	0.380621	0.217766	0.035974	0	0.640817	23691	0	0
57522	cg25319649	chr1	203639282	-	0.968022	0.971372	-0.00335061	-0.00493409	0.000135089	0.984894	0.945646	0.00679658	0.98555	0.958557	0.0070947	0	0.640817	444087	0	0
428211	cg03444245	chr11	45377079	-	0.0355087	0.0293285	0.0061802	0.210567	0.000136322	0.0601489	0.0193439	0.008508	0.0508544	0.0152202	0.00803088	0	0.640817	157110	0	0
480719	cg09412528	chr12	98987242	-	0.0587352	0.0506332	0.00810201	0.180941	0.000138551	0.0889807	0.0328546	0.0117737	0.0818871	0.030548	0.0117747	0	0.640817	112682	0	0
455133	cg24496609	chr11	130417065	-	0.957598	0.963124	-0.00552571	-0.00821543	0.000140233	0.975189	0.928691	0.00940557	0.983134	0.936042	0.0097335	0	0.640817	361306	0	0
953	cg23036947	chr1	1294018	-	0.182456	0.157124	0.0253317	0.203608	0.0001405	0.303577	0.0784804	0.0495283	0.255752	0.0672863	0.042979	0	0.640817	10806	0	0
695532	cg19966760	chr20	55205819	+	0.110992	0.0967785	0.014214	0.180296	0.000141655	0.237027	0.0458021	0.0349763	0.157869	0.0493324	0.0258595	0	0.640817	44444	0	0
423014	cg22062807	chr11	17567314	-	0.924914	0.930342	-0.00542851	-0.00835267	0.000144075	0.951422	0.894437	0.0119717	0.954603	0.895116	0.0119189	0	0.640817	358731	0	0
449743	cg00477721	chr11	117233965	-	0.980845	0.984129	-0.00328421	-0.00477398	0.000144903	0.990541	0.940147	0.00705892	0.992984	0.9735	0.00501283	0	0.640817	449485	0	0
181339	cg19823803	chr4	55549850	-	0.0136542	0.0153841	-0.00172987	-0.101827	0.000145074	0.0370356	0.0022413	0.0067361	0.0321344	0.00434922	0.00710651	0	0.640817	417861	0	0
487719	cg24889207	chr12	120124618	+	0.921677	0.928204	-0.00652767	-0.0100728	0.000145293	0.947933	0.886606	0.0127524	0.949775	0.899609	0.0123855	0	0.640817	329637	0	0
426583	cg09324712	chr11	35317407	+	0.819683	0.796771	0.0229118	0.0404006	0.000145999	0.905071	0.706418	0.0460022	0.86749	0.704418	0.0455114	0	0.640817	143668	0	0
318936	cg23606195	chr7	150805697	-	0.906994	0.919405	-0.0124104	-0.0193942	0.000146053	0.944521	0.859294	0.0176307	0.946474	0.889523	0.01385	0	0.640817	237187	0	0
343550	cg09497945	chr8	99436225	+	0.896315	0.912016	-0.0157013	-0.0247798	0.00014746	0.944193	0.838376	0.0208745	0.948936	0.882779	0.0178311	0	0.640817	205595	0	0
428159	cg18110362	chr11	45258014	+	0.854413	0.892336	-0.0379221	-0.0619425	0.000147612	0.942948	0.645556	0.0658644	0.949189	0.783634	0.0342469	0	0.640817	90205	0	0
221936	cg25022925	chr5	126112600	+	0.0733725	0.0695279	0.00384459	0.0681103	0.000148429	0.107858	0.0445745	0.0108791	0.101441	0.0386539	0.0129086	0	0.640817	247987	0	0
35939	cg24808901	chr1	95698954	+	0.583978	0.499797	0.0841809	0.220487	0.000151805	0.86442	0.242164	0.129028	0.719642	0.235332	0.116206	0	0.640817	3416	0	0
723170	cg11274568	chr22	48605506	+	0.852563	0.86463	-0.0120664	-0.0200419	0.000152196	0.894341	0.80557	0.0197204	0.906698	0.825461	0.022192	0	0.640817	232913	0	0
545254	cg09817848	chr15	45954755	+	0.938352	0.948402	-0.01005	-0.0152083	0.000152863	0.967956	0.894069	0.0151105	0.973851	0.91852	0.0122474	0	0.640817	269816	0	0
164164	cg20280182	chr3	183889887	-	0.889672	0.89911	-0.0094376	-0.0150551	0.000153062	0.93105	0.843717	0.018835	0.934531	0.867802	0.0183524	0	0.640817	271300	0	0
106888	cg02199111	chr2	170334588	+	0.961464	0.965389	-0.00392457	-0.00581652	0.000153472	0.979259	0.935969	0.00836161	0.983715	0.949356	0.00799204	0	0.640817	416801	0	0
422908	cg11789121	chr11	17411952	+	0.94802	0.953347	-0.00532654	-0.00799909	0.000154339	0.962978	0.926934	0.00756526	0.969809	0.942728	0.00717639	0	0.640817	365537	0	0
568216	cg22508957	chr16	3507546	-	0.0780965	0.0579139	0.0201826	0.375378	0.000155022	0.211628	0.0277993	0.040351	0.123352	0.0256635	0.0267261	0	0.640817	20040	0	0
633580	cg18879998	chr17	80895949	-	0.963022	0.9682	-0.00517796	-0.00765699	0.000155611	0.982331	0.941514	0.00902567	0.987613	0.940606	0.00997751	0	0.640817	372506	0	0
406415	cg19873536	chr10	116475283	-	0.722391	0.687548	0.0348427	0.070321	0.000156287	0.898956	0.466902	0.0896906	0.85769	0.479403	0.0923172	0	0.640817	75641	0	0
354699	cg10433678	chr8	144943023	-	0.962574	0.965316	-0.00274219	-0.00406199	0.000157445	0.975088	0.943267	0.00589692	0.976076	0.953098	0.00580779	0	0.640817	475809	0	0
370961	cg14320496	chr9	127960209	+	0.955622	0.959852	-0.00422919	-0.00630485	0.000158253	0.979402	0.921425	0.0103283	0.977478	0.940787	0.00926221	0	0.640817	403762	0	0
424280	cg17679980	chr11	22696306	+	0.938421	0.946039	-0.00761803	-0.0115419	0.00015906	0.966112	0.884212	0.0142304	0.966327	0.920393	0.0108086	0	0.640817	309140	0	0
680687	cg06751243	chr20	1927911	-	0.0965602	0.0864298	0.0101304	0.144117	0.000160476	0.21551	0.0491098	0.0251445	0.118358	0.0389716	0.0173168	0	0.640817	81322	0	0
457623	cg16938246	chr12	2688465	-	0.94381	0.948384	-0.00457439	-0.0069025	0.0001612	0.964328	0.916697	0.00978655	0.965341	0.927203	0.00862895	0	0.640817	389003	0	0
686421	cg14101379	chr20	30232469	-	0.942856	0.946096	-0.00324	-0.00489729	0.000166215	0.966547	0.91138	0.0123467	0.972154	0.92045	0.0132143	0	0.640817	445262	0	0
62544	cg06700740	chr1	221333169	-	0.962187	0.966981	-0.00479335	-0.0070957	0.000166876	0.981664	0.929565	0.010242	0.983841	0.945862	0.00977484	0	0.640817	384637	0	0
217375	cg12644123	chr5	93451150	+	0.942818	0.951205	-0.00838731	-0.0126439	0.000167271	0.969372	0.912394	0.0115806	0.969149	0.931601	0.00999162	0	0.640817	295978	0	0
311626	cg14030525	chr7	119960959	+	0.473891	0.429258	0.0446323	0.139611	0.000167762	0.710175	0.207619	0.0978288	0.667182	0.238209	0.0955167	0	0.640817	17053	0	0
233947	cg00224471	chr5	169918864	-	0.8309	0.8097	0.0212	0.0368383	0.000167952	0.944986	0.598858	0.0539271	0.915334	0.656535	0.0591344	0	0.640817	155438	0	0
470628	cg00790741	chr12	53453327	-	0.925924	0.928758	-0.00283457	-0.00436279	0.000171461	0.95205	0.888099	0.0137488	0.954782	0.897762	0.0149406	0	0.640817	464254	0	0
210309	cg16856920	chr5	54289358	-	0.91879	0.933518	-0.0147278	-0.0226974	0.00017249	0.96242	0.795461	0.0314089	0.964829	0.870868	0.0229439	0	0.640817	216826	0	0
459078	cg07949356	chr12	6186592	-	0.913543	0.921804	-0.00826104	-0.0128475	0.00017261	0.944328	0.877819	0.0153927	0.949413	0.881977	0.0150384	0	0.640817	293697	0	0
489019	cg02813877	chr12	122241955	-	0.0353648	0.0401126	-0.00474779	-0.1436	0.00017285	0.0568958	0.0136122	0.00943674	0.0607197	0.0174579	0.00932532	0	0.640817	206137	0	0
63571	cg17839226	chr1	225665763	+	0.0790382	0.0609457	0.0180925	0.327708	0.000173716	0.167688	0.026919	0.033623	0.125606	0.0266065	0.027256	0	0.640817	26206	0	0
670924	cg20179520	chr19	45926920	+	0.0785646	0.0733983	0.00516627	0.0867117	0.000173961	0.100455	0.0510949	0.0109842	0.0922458	0.0520046	0.0108947	0	0.640817	189898	0	0
516690	cg11867950	chr14	31890052	-	0.00694617	0.00817248	-0.00122631	-0.100796	0.000173988	0.0155562	0.00176192	0.0030086	0.0168714	0.00361596	0.00353355	0	0.640817	486576	0	0
348886	cg17857086	chr8	127034119	+	0.561818	0.530907	0.0309118	0.0801776	0.000174425	0.736245	0.269132	0.109811	0.715109	0.291637	0.121767	0	0.640817	61045	0	0
371681	cg00342530	chr9	130027020	+	0.809057	0.818465	-0.00940751	-0.016476	0.000174509	0.881846	0.705427	0.0344488	0.888964	0.751377	0.0345536	0	0.640817	258740	0	0
669580	cg03305036	chr19	43970537	+	0.939583	0.9465	-0.00691651	-0.0104701	0.00017481	0.965732	0.878127	0.0120547	0.966492	0.917559	0.0123846	0	0.640817	323716	0	0
194943	cg00706450	chr4	155483779	+	0.819178	0.842431	-0.0232528	-0.0399008	0.000175611	0.922097	0.691831	0.0455099	0.928944	0.727089	0.0436492	0	0.640817	145295	0	0
187649	cg25433855	chr4	102268622	+	0.0147298	0.0171911	-0.00246127	-0.136883	0.000175957	0.0394748	0.00314777	0.00662248	0.0346206	0.00423479	0.00668795	0	0.640817	342504	0	0
464852	cg24648741	chr12	29194866	-	0.893051	0.858921	0.0341303	0.055583	0.000178148	0.961	0.70016	0.0451764	0.932548	0.694806	0.0651949	0	0.640817	103285	0	0
108288	cg01269597	chr2	175200286	+	0.0289561	0.035055	-0.00609897	-0.20984	0.000178496	0.0574996	0.0107932	0.00944219	0.0878852	0.0160862	0.0135627	0	0.640817	159493	0	0
167305	cg02153814	chr3	194014525	+	0.801917	0.770014	0.0319031	0.0578324	0.000179313	0.910075	0.648097	0.0520571	0.882737	0.634235	0.0676807	0	0.640817	98454	0	0
568004	cg16749825	chr16	3241054	+	0.17507	0.238883	-0.0638131	-0.427397	0.000180109	0.366614	0.0610539	0.0736657	0.441537	0.0989386	0.100395	0	0.640817	274	0	0
128226	cg08424512	chr3	10268074	+	0.948472	0.954412	-0.00593995	-0.00891323	0.000180304	0.973404	0.915726	0.011846	0.968668	0.933706	0.00925597	0	0.640817	348571	0	0
575068	cg20754235	chr16	27712635	+	0.965611	0.969724	-0.00411286	-0.00606916	0.000181168	0.981608	0.946059	0.00678651	0.983096	0.954149	0.00744162	0	0.640817	409927	0	0
238534	cg05671673	chr5	179799212	-	0.934091	0.942078	-0.0079867	-0.0121534	0.000181197	0.961258	0.890664	0.014458	0.977508	0.908949	0.014515	0	0.640817	301677	0	0
615341	cg16022555	chr17	43394535	+	0.0730526	0.0801933	-0.00714074	-0.118996	0.000182339	0.100351	0.0464406	0.0118695	0.115096	0.0565561	0.0131451	0	0.640817	132539	0	0
141313	cg25118511	chr3	53926156	-	0.0151718	0.0184405	-0.00326871	-0.176139	0.000183499	0.0259809	0.00486068	0.00449877	0.0354732	0.00877463	0.00628809	0	0.640817	281946	0	0
133906	cg17479303	chr3	37218212	-	0.0115604	0.0158546	-0.00429424	-0.262039	0.000183613	0.0237902	0.00320327	0.00415927	0.0360047	0.00622785	0.00669494	0	0.640817	225746	0	0
291825	cg08889440	chr7	21065099	-	0.821107	0.836176	-0.0150697	-0.0259248	0.000184914	0.889547	0.715285	0.0353882	0.919619	0.774195	0.0327641	0	0.640817	199757	0	0
371855	cg03004953	chr9	130428222	-	0.976473	0.97911	-0.00263665	-0.0038509	0.000185121	0.988068	0.958932	0.00613526	0.990749	0.97024	0.00571374	0	0.640817	484513	0	0
20824	cg02483735	chr1	37051530	-	0.766649	0.803644	-0.0369955	-0.0671358	0.000185607	0.922783	0.468314	0.0959693	0.918513	0.659757	0.0637668	0	0.640817	80817	0	0
214018	cg06030649	chr5	73981490	+	0.0109058	0.0119384	-0.00103263	-0.069557	0.000186345	0.0206311	0.00420231	0.00324656	0.017228	0.00584481	0.00314784	0	0.640817	517676	0	0
497118	cg22600945	chr13	27825611	-	0.00376498	0.00459756	-0.000832585	-0.0847252	0.000186815	0.00762874	0.000929835	0.00140312	0.00912876	0.00176257	0.0018773	0	0.640817	552689	0	0
658009	cg00029458	chr19	13372996	+	0.969635	0.972673	-0.00303838	-0.00446766	0.000187423	0.983533	0.953593	0.00674016	0.983736	0.958249	0.00659665	0	0.640817	460464	0	0
483643	cg17054031	chr12	109703028	-	0.93446	0.941154	-0.00669443	-0.0101899	0.000188301	0.959429	0.899933	0.01315	0.961351	0.911257	0.0125392	0	0.640817	327855	0	0
289747	cg14549849	chr7	6539550	-	0.96802	0.97184	-0.0038199	-0.00562382	0.000188363	0.982281	0.951057	0.00666072	0.985712	0.962135	0.00616925	0	0.640817	422457	0	0
564077	cg05787952	chr16	734667	-	0.0534717	0.0494238	0.00404788	0.0950723	0.000188422	0.106019	0.0295954	0.0149285	0.0781229	0.0305406	0.0127323	0	0.640817	237655	0	0
88612	cg11072779	chr2	70044977	+	0.951624	0.957754	-0.00612998	-0.00916743	0.000188679	0.968984	0.927932	0.00874321	0.96994	0.940924	0.00682167	0	0.640817	344135	0	0
286908	cg18546384	chr7	2077057	-	0.90552	0.915688	-0.0101681	-0.0159348	0.000188997	0.950492	0.842592	0.0226776	0.955525	0.869923	0.0222371	0	0.640817	263310	0	0
150331	cg26550787	chr3	120369337	-	0.946979	0.952712	-0.00573248	-0.00861622	0.000189591	0.97679	0.913086	0.0128118	0.974677	0.923238	0.0116028	0	0.640817	353787	0	0
135117	cg05994652	chr3	41896526	-	0.92375	0.930326	-0.00657606	-0.0101248	0.000190054	0.954301	0.861931	0.0171361	0.952624	0.900331	0.0137444	0	0.640817	328836	0	0
657330	cg17742874	chr19	12792761	-	0.0124262	0.0143286	-0.00190242	-0.117469	0.000192491	0.0271265	0.0044061	0.00393308	0.0231779	0.00799705	0.00374254	0	0.640817	397741	0	0
426354	cg09570399	chr11	34646080	+	0.776185	0.810158	-0.0339729	-0.0610329	0.000194941	0.898799	0.565637	0.0706096	0.914399	0.687129	0.0483775	0	0.640817	91906	0	0
174260	cg09789721	chr4	7463007	-	0.305608	0.250897	0.0547113	0.274655	0.000195079	0.626548	0.116228	0.0904777	0.377239	0.11124	0.0686368	0	0.640817	1300	0	0
282754	cg19992756	chr6	168466778	-	0.915581	0.921292	-0.00571124	-0.00887471	0.000199456	0.954882	0.824162	0.0194613	0.959695	0.876589	0.019401	0	0.640817	349259	0	0
149590	cg12035174	chr3	115701750	-	0.929878	0.93716	-0.00728226	-0.011135	0.000200032	0.965934	0.87698	0.0159924	0.962095	0.887168	0.0140596	0	0.640817	314527	0	0
218217	cg11734183	chr5	98105073	-	0.0616935	0.0730389	-0.0113454	-0.211944	0.000200045	0.104098	0.028448	0.0168299	0.184996	0.0410615	0.0300128	0	0.640817	67440	0	0
94835	cg11714376	chr2	101320471	-	0.828213	0.846836	-0.0186229	-0.031702	0.000200383	0.909309	0.666231	0.0427849	0.908617	0.795228	0.0313878	0	0.640817	174471	0	0
529900	cg23639055	chr14	90165602	+	0.951329	0.956903	-0.0055742	-0.0083412	0.000201456	0.972822	0.917433	0.0104727	0.976081	0.936864	0.0100882	0	0.640817	358974	0	0
289153	cg13030786	chr7	5459645	+	0.0184265	0.0220884	-0.00366186	-0.174814	0.000202264	0.0426068	0.00688715	0.00615318	0.0421865	0.011882	0.00757145	0	0.640817	258043	0	0
568214	cg00484396	chr16	3507460	+	0.065916	0.0449923	0.0209237	0.465174	0.000203268	0.205172	0.0155189	0.0412784	0.122051	0.014621	0.0269277	0	0.640817	18171	0	0
442687	cg12269002	chr11	77122929	+	0.105457	0.099924	0.0055333	0.070853	0.00020574	0.128124	0.0726067	0.0125164	0.121354	0.0746578	0.0144639	0	0.640817	177047	0	0
499636	cg08717751	chr13	37881008	+	0.680484	0.657404	0.0230799	0.0490475	0.000207262	0.786744	0.530048	0.0558859	0.774889	0.502714	0.0659457	0	0.640817	118954	0	0
221731	cg08649379	chr5	124852645	-	0.849232	0.864249	-0.0150173	-0.024997	0.000207408	0.900893	0.757518	0.0313695	0.912545	0.793666	0.0255833	0	0.640817	204480	0	0
700156	cg24294835	chr20	62772566	+	0.931377	0.939711	-0.00833308	-0.0127146	0.000207675	0.961476	0.893076	0.0132463	0.964323	0.910793	0.0118904	0	0.640817	295168	0	0
245368	cg15121267	chr6	22294766	+	0.864509	0.875479	-0.0109696	-0.0179842	0.000207848	0.933635	0.743513	0.0374854	0.942039	0.783894	0.036844	0	0.640817	246938	0	0
624490	cg02234489	chr17	71547421	+	0.960041	0.965097	-0.00505564	-0.00749948	0.000208542	0.981637	0.93454	0.0100836	0.984673	0.945694	0.010405	0	0.640817	375843	0	0
177579	cg09037869	chr4	25915490	-	0.0206856	0.0240734	-0.00338786	-0.151087	0.000209826	0.0368046	0.0078083	0.00586977	0.0389688	0.013083	0.00675981	0	0.640817	274325	0	0
677978	cg21813050	chr19	56060880	-	0.707003	0.652975	0.0540277	0.113024	0.000210224	0.837495	0.524323	0.0719808	0.758233	0.472335	0.0666283	0	0.640817	29813	0	0
349527	cg04008854	chr8	129320905	+	0.953566	0.962148	-0.00858183	-0.0127922	0.000210291	0.977857	0.917501	0.0130434	0.981442	0.936837	0.0108816	0	0.640817	294289	0	0
560661	cg25059434	chr15	93617833	-	0.956377	0.961864	-0.00548726	-0.0081687	0.00021084	0.981448	0.923341	0.0110873	0.977979	0.945609	0.00921119	0	0.640817	362189	0	0
158397	cg19532122	chr3	150541397	+	0.953297	0.959394	-0.00609638	-0.00910155	0.000210872	0.976808	0.920417	0.0107287	0.98234	0.935502	0.0110128	0	0.640817	345263	0	0
228483	cg11488093	chr5	144809143	+	0.871132	0.88084	-0.00970824	-0.0158086	0.000211707	0.942174	0.809443	0.0222221	0.944621	0.839104	0.0231846	0	0.640817	264455	0	0
309824	cg24232378	chr7	106545895	+	0.912971	0.928134	-0.0151625	-0.023508	0.000211814	0.964569	0.790868	0.0307287	0.970136	0.889888	0.0185136	0	0.640817	212253	0	0
532557	cg26937778	chr14	96562667	+	0.768551	0.802748	-0.0341972	-0.0620168	0.000211968	0.915689	0.536355	0.07525	0.903089	0.701088	0.0580348	0	0.640817	90047	0	0
571126	cg26885250	chr16	11784060	+	0.928558	0.93446	-0.00590209	-0.00904393	0.000215282	0.959547	0.878478	0.0160389	0.965452	0.898317	0.0150752	0	0.640817	346299	0	0
392382	cg24443446	chr10	65647572	+	0.913652	0.922155	-0.00850298	-0.0132204	0.000215729	0.951132	0.845654	0.0196277	0.949428	0.884235	0.0152398	0	0.640817	289512	0	0
191381	cg19249858	chr4	129857969	-	0.96345	0.969481	-0.00603075	-0.00891027	0.000216379	0.985205	0.903181	0.0136207	0.987448	0.947418	0.00966525	0	0.640817	348616	0	0
691374	cg11731821	chr20	43277540	-	0.936702	0.944945	-0.00824275	-0.0125069	0.000216545	0.969359	0.900348	0.0145779	0.974755	0.92376	0.0127428	0	0.640817	297526	0	0
246857	cg09513990	chr6	27235822	+	0.0574371	0.0745478	-0.0171107	-0.326225	0.000218488	0.240742	0.0130638	0.0282931	0.200024	0.0214809	0.042433	0	0.640817	29912	0	0
115447	cg02239891	chr2	214016774	+	0.0172793	0.0211202	-0.00384092	-0.190045	0.000220525	0.0435632	0.00461786	0.00702706	0.0406363	0.00837212	0.00759297	0	0.640817	248180	0	0
186284	cg19096460	chr4	89490818	-	0.931909	0.925021	0.00688869	0.01059	0.00022103	0.964624	0.866639	0.0189828	0.952315	0.868114	0.0189208	0	0.640817	322015	0	0
2687	cg01737466	chr1	2512442	+	0.915657	0.928194	-0.0125364	-0.0194076	0.000221107	0.962265	0.858267	0.0209594	0.958248	0.880824	0.0174041	0	0.640817	237105	0	0
387624	cg14982967	chr10	33502525	+	0.969863	0.973282	-0.00341895	-0.0050251	0.000221302	0.983896	0.950693	0.00787589	0.986527	0.955834	0.00779042	0	0.640817	441065	0	0
322609	cg05101821	chr7	158207371	+	0.9608	0.966553	-0.00575306	-0.00852433	0.000222845	0.98544	0.883295	0.0155868	0.98483	0.942659	0.0114435	0	0.640817	355548	0	0
679560	cg10957906	chr19	58897201	-	0.9033	0.911712	-0.0084117	-0.0132267	0.000223251	0.96221	0.833258	0.0282231	0.959291	0.810082	0.0319056	0	0.640817	289453	0	0
1448	cg26421735	chr1	1710265	+	0.0327575	0.0368358	-0.00407836	-0.131436	0.000224601	0.0691659	0.00585801	0.0109888	0.0613953	0.0141235	0.0105794	0	0.640817	236114	0	0
206301	cg12913512	chr5	24488007	-	0.941704	0.94895	-0.0072467	-0.0109437	0.000226295	0.971713	0.893927	0.0149302	0.975071	0.90887	0.0160869	0	0.640817	317024	0	0
336442	cg02293964	chr8	55240874	+	0.954977	0.962847	-0.00787021	-0.0117187	0.000226484	0.981464	0.918862	0.0135728	0.988537	0.934378	0.0112892	0	0.640817	306977	0	0
425124	cg07082447	chr11	30771240	+	0.515723	0.477596	0.0381272	0.108617	0.0002265	0.764787	0.24472	0.0894473	0.683266	0.228009	0.0949665	0	0.640817	32738	0	0
270532	cg21125605	chr6	111493072	+	0.752769	0.76895	-0.0161819	-0.0302862	0.000226698	0.852105	0.619983	0.0497159	0.85363	0.599772	0.0527767	0	0.640817	180394	0	0
99043	cg11811017	chr2	120858236	+	0.972461	0.976796	-0.00433532	-0.0063522	0.000228238	0.985696	0.953671	0.00653878	0.989668	0.966965	0.00590021	0	0.640817	402491	0	0
589066	cg10409860	chr16	81969992	-	0.960357	0.964014	-0.00365708	-0.005427	0.000231098	0.975643	0.920405	0.00839877	0.977421	0.943863	0.00804198	0	0.640817	428381	0	0
683992	cg20944747	chr20	17787880	-	0.947994	0.95456	-0.00656557	-0.00985372	0.000232641	0.972435	0.923896	0.0106784	0.978265	0.924712	0.0120276	0	0.640817	332975	0	0
661432	cg19771975	chr19	18726088	+	0.867781	0.832783	0.0349983	0.0587004	0.000232681	0.944744	0.690725	0.0483034	0.930072	0.566594	0.0782926	0	0.640817	96627	0	0
534296	cg10090699	chr14	101184107	+	0.236417	0.221266	0.0151507	0.091547	0.000233939	0.332617	0.153037	0.0338403	0.289715	0.165381	0.0365922	0	0.640817	47715	0	0
147025	cg21010050	chr3	99979819	-	0.0178451	0.0160326	0.00181249	0.0971036	0.00023523	0.0267955	0.0103757	0.00383887	0.0246601	0.0101708	0.00379176	0	0.640817	408009	0	0
564009	cg02268354	chr16	718175	-	0.0132873	0.01628	-0.00299274	-0.174424	0.000237107	0.0206723	0.00388502	0.00401373	0.0286613	0.00522395	0.00542965	0	0.640817	300706	0	0
2561	cg17979046	chr1	2429078	-	0.812338	0.832254	-0.0199164	-0.0345246	0.000237142	0.884952	0.692862	0.0348477	0.878457	0.77965	0.025905	0	0.640817	163620	0	0
462020	cg19817757	chr12	13142313	-	0.950237	0.954472	-0.00423475	-0.00634846	0.000237537	0.971443	0.924235	0.00954647	0.975235	0.931059	0.00954612	0	0.640817	402595	0	0
706884	cg14583552	chr21	45170145	+	0.944487	0.951577	-0.00709008	-0.010677	0.000240107	0.962527	0.89806	0.0112964	0.973872	0.925284	0.0112225	0	0.640817	320834	0	0
92918	cg12539060	chr2	89203426	+	0.0257915	0.0312693	-0.00547781	-0.205453	0.000240727	0.0487952	0.00778594	0.00864441	0.0658966	0.0124353	0.0123817	0	0.640817	178931	0	0
33345	cg22780859	chr1	85101330	-	0.919015	0.927492	-0.00847707	-0.0131046	0.000241324	0.949135	0.88208	0.0139793	0.952232	0.90305	0.0120393	0	0.640817	290807	0	0
282745	cg14774180	chr6	168453959	-	0.906507	0.915351	-0.00884411	-0.013855	0.000244017	0.940763	0.859789	0.0152657	0.930629	0.898322	0.00853169	0	0.640817	282854	0	0
535312	cg20752298	chr14	102304871	-	0.970127	0.965645	0.00448226	0.00661278	0.000244103	0.989826	0.935109	0.00977857	0.983815	0.942004	0.00907877	0	0.640817	395992	0	0
590840	cg10272731	chr16	85614015	-	0.910953	0.915543	-0.00458926	-0.00717133	0.000244756	0.939606	0.880662	0.0115052	0.939341	0.893297	0.0117574	0	0.640817	382893	0	0
568218	cg09873201	chr16	3507582	-	0.0160715	0.0114918	0.00457977	0.278692	0.000244811	0.0586488	0.00372339	0.00921004	0.0207439	0.00407261	0.00504931	0	0.640817	213228	0	0
217782	cg08723126	chr5	95372972	+	0.784538	0.804543	-0.020005	-0.0358747	0.000245524	0.893662	0.692274	0.0418837	0.896819	0.740958	0.0372667	0	0.640817	158716	0	0
631158	cg00187671	chr17	79269466	+	0.0381094	0.0411645	-0.00305507	-0.0888236	0.000245595	0.0549592	0.0256538	0.00602207	0.0526294	0.0287402	0.00618753	0	0.640817	296354	0	0
472630	cg01178113	chr12	56473753	-	0.0412406	0.0378735	0.00336711	0.0980603	0.000246428	0.0614498	0.0229108	0.00736483	0.0504188	0.0206281	0.00661606	0	0.640817	275666	0	0
525405	cg21836031	chr14	71272941	-	0.954483	0.959	-0.00451679	-0.00674053	0.000248072	0.972958	0.919684	0.010666	0.976315	0.929581	0.0104508	0	0.640817	392889	0	0
632205	cg06205074	chr17	79954975	-	0.981906	0.98417	-0.00226447	-0.00328984	0.000249198	0.990794	0.967219	0.00472559	0.991083	0.971967	0.00486689	0	0.640817	509742	0	0
594975	cg09299076	chr16	89795781	-	0.936066	0.941365	-0.00529885	-0.00805789	0.000249278	0.957734	0.910928	0.00927674	0.962126	0.912559	0.00939246	0	0.640817	364368	0	0
25920	cg09258479	chr1	47655861	-	0.11574	0.109279	0.00646078	0.0761011	0.000249837	0.205438	0.0657875	0.0273377	0.185557	0.0672653	0.0259647	0	0.640817	149394	0	0
432042	cg11327194	chr11	61521905	-	0.945081	0.94995	-0.00486882	-0.0073359	0.000250074	0.964334	0.911541	0.00995411	0.964122	0.929509	0.00931618	0	0.640817	379308	0	0
545838	cg12290394	chr15	49448261	+	0.00683389	0.00834037	-0.00150648	-0.123654	0.000251044	0.012365	0.00323529	0.00208454	0.014461	0.00339459	0.00222066	0	0.640817	446295	0	0
357177	cg21338588	chr9	7489169	+	0.832669	0.846237	-0.0135681	-0.0230444	0.000251896	0.892989	0.788346	0.0209173	0.892299	0.803141	0.0211908	0	0.640817	214874	0	0
669155	cg07584558	chr19	42703228	+	0.0631733	0.0581885	0.00498481	0.101789	0.000253013	0.117984	0.0389482	0.0122252	0.0786184	0.0412181	0.00830588	0	0.640817	196709	0	0
120011	cg12339238	chr2	231729690	-	0.169042	0.161946	0.00709656	0.0583471	0.000254924	0.210889	0.101434	0.0220187	0.203305	0.0992773	0.024219	0	0.640817	133616	0	0
629735	cg14228980	chr17	78122221	-	0.9308	0.935386	-0.00458549	-0.00701466	0.000256909	0.956337	0.905502	0.00971312	0.959084	0.909966	0.0112296	0	0.640817	386466	0	0
636372	cg25836232	chr18	12306837	+	0.424316	0.375354	0.0489614	0.172559	0.000256932	0.628179	0.241823	0.0806802	0.547851	0.216415	0.0803362	0	0.640817	8619	0	0
96759	cg15166478	chr2	109237735	-	0.0147449	0.0202056	-0.00546061	-0.28768	0.000257649	0.0853376	0.000502995	0.012068	0.0601126	0.00429878	0.0125777	0	0.640817	179485	0	0
159418	cg18864995	chr3	156231486	+	0.90067	0.912566	-0.0118967	-0.0187249	0.000259475	0.945279	0.847165	0.0194621	0.947102	0.878355	0.0194411	0	0.640817	241696	0	0
601602	cg19643410	chr17	7911420	+	0.945398	0.95386	-0.00846204	-0.0127218	0.000261985	0.969376	0.915902	0.0101986	0.976145	0.921811	0.0126644	0	0.640817	295096	0	0
209150	cg24635834	chr5	42949919	+	0.00873548	0.0119099	-0.00317446	-0.225813	0.000262008	0.0343505	0.000788082	0.00491867	0.0296457	0.00231566	0.00709616	0	0.640817	288127	0	0
217802	cg08846894	chr5	95493579	+	0.929334	0.936188	-0.00685408	-0.0104888	0.000262323	0.967409	0.854522	0.0226529	0.968562	0.886918	0.0171943	0	0.640817	323454	0	0
413182	cg01757745	chr10	134755601	-	0.50532	0.484385	0.0209349	0.0598335	0.000262443	0.717638	0.306693	0.0774054	0.612759	0.287152	0.0882833	0	0.640817	94404	0	0
259813	cg02539671	chr6	41132055	-	0.946337	0.956096	-0.00975899	-0.0146474	0.000262845	0.972667	0.90542	0.0134749	0.973859	0.924401	0.0112698	0	0.640817	274984	0	0
664498	cg18486942	chr19	35342657	-	0.954057	0.957755	-0.00369793	-0.0055233	0.000264086	0.976904	0.911131	0.0109822	0.974978	0.936593	0.0107202	0	0.640817	425493	0	0
236638	cg00619245	chr5	176690505	-	0.978	0.980873	-0.00287292	-0.004189	0.000265153	0.98762	0.964919	0.00564857	0.989697	0.968427	0.00500203	0	0.640817	470875	0	0
158203	cg15864571	chr3	149966904	-	0.945001	0.950643	-0.00564192	-0.00849802	0.000265784	0.969778	0.906328	0.0128859	0.969826	0.909591	0.0127808	0	0.640817	356040	0	0
638781	cg16967099	chr18	30351472	-	0.0324676	0.0362001	-0.0037325	-0.121533	0.000266516	0.0690248	0.0162756	0.00817849	0.0643068	0.0202825	0.00851773	0	0.640817	254043	0	0
529855	cg10518733	chr14	90051460	-	0.972839	0.975772	-0.00293346	-0.00429956	0.000267102	0.986697	0.956972	0.00653872	0.988817	0.96417	0.00679667	0	0.640817	466647	0	0
704249	cg16320339	chr21	38740894	+	0.011426	0.0127441	-0.00131814	-0.0861323	0.000267221	0.0181564	0.00518814	0.00258487	0.022119	0.00788982	0.00299759	0	0.640817	472586	0	0
235463	cg25136605	chr5	173400737	-	0.325593	0.305353	0.0202402	0.0897457	0.000267989	0.430757	0.239395	0.0421814	0.3906	0.235952	0.0437742	0	0.640817	49555	0	0
644035	cg00268735	chr18	61429876	+	0.947686	0.952873	-0.0051874	-0.00779342	0.000268607	0.969402	0.92499	0.0102432	0.970918	0.925178	0.0103903	0	0.640817	369606	0	0
516303	cg18875371	chr14	29244185	-	0.0865279	0.105054	-0.0185258	-0.25329	0.000269528	0.200633	0.0433593	0.0271258	0.261028	0.0582079	0.0424213	0	0.640817	24687	0	0
257521	cg19355881	chr6	34759549	+	0.0661912	0.0605664	0.0056248	0.110643	0.000269545	0.0890565	0.0364173	0.0117819	0.0806376	0.0373985	0.0112972	0	0.640817	174006	0	0
339376	cg15726318	chr8	71315757	+	0.104682	0.096668	0.00801426	0.104515	0.000270027	0.153029	0.0656992	0.0178157	0.131028	0.0655277	0.0141953	0	0.640817	114290	0	0
119103	cg00732415	chr2	227348914	+	0.873044	0.823873	0.0491717	0.0826589	0.000271159	0.967471	0.624967	0.0688792	0.959088	0.501804	0.0951741	0	0.640817	57841	0	0
295109	cg17617930	chr7	31091825	+	0.0132256	0.0149727	-0.00174715	-0.104639	0.00027178	0.0386695	0.00352003	0.005493	0.0306605	0.00645512	0.00502124	0	0.640817	415793	0	0
567924	cg19842098	chr16	3187414	-	0.973968	0.976782	-0.00281374	-0.00411962	0.000273737	0.986601	0.953621	0.0065292	0.989025	0.96077	0.00724834	0	0.640817	473551	0	0
338698	cg16932652	chr8	67579508	+	0.0121429	0.0149739	-0.00283105	-0.17358	0.000274063	0.023691	0.00533414	0.00381389	0.0249955	0.00655861	0.00450923	0	0.640817	312542	0	0
542051	cg22892489	chr15	38857738	+	0.953127	0.955396	-0.00226909	-0.00339493	0.000274087	0.975634	0.922017	0.0106455	0.976428	0.912721	0.0139058	0	0.640817	504723	0	0
26970	cg18381573	chr1	52042032	-	0.941525	0.948752	-0.00722708	-0.0109162	0.000275345	0.970845	0.855441	0.0185534	0.973784	0.916106	0.0122179	0	0.640817	317443	0	0
691816	cg21482942	chr20	44033595	-	0.845827	0.813008	0.0328193	0.0564132	0.000276711	0.94252	0.559628	0.0667959	0.934252	0.574469	0.0768666	0	0.640817	101503	0	0
188625	cg20111875	chr4	109094570	+	0.0205775	0.022791	-0.00221354	-0.100831	0.000277182	0.0310919	0.012567	0.00405827	0.0316541	0.014325	0.00447637	0	0.640817	365625	0	0
61017	cg01003599	chr1	213123436	+	0.62723	0.543177	0.0840529	0.204073	0.000277488	0.904995	0.201166	0.142729	0.774012	0.161428	0.160265	0	0.640817	4675	0	0
564372	cg05479627	chr16	869560	-	0.0109331	0.0130873	-0.00215417	-0.141311	0.000278736	0.027717	0.00265991	0.00489934	0.0426697	0.00404279	0.00746904	0	0.640817	371388	0	0
311611	cg25241964	chr7	119912723	+	0.0259259	0.0285162	-0.00259028	-0.10044	0.000279031	0.0589899	0.0109254	0.00798245	0.0533337	0.0132341	0.00797351	0	0.640817	331551	0	0
148438	cg13764020	chr3	111304209	+	0.927155	0.932803	-0.00564813	-0.00866887	0.000279135	0.960067	0.858078	0.0188025	0.954192	0.897299	0.0147391	0	0.640817	352868	0	0
187678	cg20762861	chr4	102711747	+	0.0282217	0.0267004	0.00152123	0.0585934	0.000279506	0.0533687	0.0167277	0.00627695	0.0442245	0.0174548	0.00568237	0	0.640817	444319	0	0
83994	cg07897193	chr2	46926272	-	0.0138304	0.0158371	-0.00200676	-0.116645	0.00027957	0.0234821	0.00756548	0.00291293	0.0219375	0.00859512	0.00290947	0	0.640817	386497	0	0
203498	cg04136610	chr5	5139878	+	0.112823	0.0958415	0.0169813	0.214673	0.000280733	0.265841	0.0480315	0.0388783	0.168745	0.0438189	0.0279262	0	0.640817	30409	0	0
634987	cg20190746	chr18	6161706	-	0.93972	0.946776	-0.00705538	-0.010678	0.000281868	0.966534	0.913327	0.0110309	0.96903	0.923975	0.0112473	0	0.640817	320824	0	0
721930	cg25437992	chr22	45936212	+	0.93792	0.94515	-0.00722929	-0.0109609	0.000284322	0.959293	0.915701	0.00958024	0.965096	0.9258	0.00872391	0	0.640817	316822	0	0
180193	cg06184669	chr4	47034267	+	0.0370911	0.047398	-0.010307	-0.285548	0.000285551	0.075988	0.0125427	0.0122021	0.101174	0.0190701	0.0186462	0	0.640817	79093	0	0
221479	cg16583745	chr5	123839821	-	0.930887	0.937164	-0.0062774	-0.00959339	0.000287818	0.964707	0.891127	0.0143587	0.96816	0.896749	0.0167088	0	0.640817	337124	0	0
547329	cg17146150	chr15	56657437	-	0.0123954	0.0152662	-0.00287076	-0.174004	0.000288155	0.0221764	0.00445514	0.00365562	0.0215736	0.0082597	0.00355621	0	0.640817	309535	0	0
508214	cg18761450	chr13	102568502	+	0.204598	0.195151	0.009447	0.0649504	0.000288425	0.261739	0.15455	0.0204233	0.227646	0.150743	0.0177659	0	0.640817	90549	0	0
659007	cg05682965	chr19	15292631	+	0.931947	0.937471	-0.00552431	-0.00843637	0.000292358	0.965503	0.89313	0.014925	0.964737	0.899852	0.0162321	0	0.640817	357195	0	0
557601	cg16118530	chr15	85145643	+	0.977355	0.973961	0.00339378	0.00496743	0.000292399	0.990132	0.959316	0.00649522	0.985616	0.956239	0.00652473	0	0.640817	443007	0	0
282735	cg11423891	chr6	168449235	-	0.918158	0.92638	-0.00822194	-0.0127236	0.00029378	0.962101	0.86138	0.0167652	0.957594	0.877212	0.0190286	0	0.640817	295070	0	0
184331	cg23540187	chr4	79367889	+	0.951418	0.956023	-0.00460552	-0.0068945	0.000294178	0.977875	0.916416	0.0130245	0.976301	0.929776	0.0112811	0	0.640817	389173	0	0
162221	cg08707541	chr3	172860180	+	0.850076	0.874359	-0.0242823	-0.0401668	0.000294243	0.946724	0.655919	0.0505691	0.9512	0.803689	0.0394811	0	0.640817	144415	0	0
135756	cg24315508	chr3	43234682	+	0.952939	0.957786	-0.00484709	-0.00724379	0.000294811	0.975497	0.90568	0.0134825	0.975943	0.935537	0.0106166	0	0.640817	381332	0	0
149967	cg14602658	chr3	119182282	+	0.0137181	0.0108404	0.00287775	0.186609	0.000294911	0.0273172	0.00528176	0.0043104	0.020222	0.00411555	0.00402479	0	0.640817	308998	0	0
171844	cg12516019	chr4	2951291	-	0.952812	0.956553	-0.00374093	-0.00559461	0.000295088	0.971065	0.928501	0.0100115	0.972698	0.936497	0.00971924	0	0.640817	423313	0	0
22140	cg10214754	chr1	40190384	-	0.722138	0.684838	0.0372999	0.0754389	0.000295324	0.893191	0.504725	0.0871319	0.821691	0.435904	0.086291	0	0.640817	67683	0	0
17144	cg09343755	chr1	28654470	-	0.967668	0.972689	-0.00502098	-0.00739024	0.00029566	0.984909	0.939785	0.00817704	0.988114	0.956327	0.00783803	0	0.640817	378121	0	0
568177	cg26668626	chr16	3451006	+	0.0128012	0.0162837	-0.00348241	-0.205053	0.000297837	0.0294156	0.00315979	0.00546198	0.0298733	0.00335533	0.00662156	0	0.640817	268602	0	0
97382	cg14417920	chr2	111996928	-	0.882714	0.89442	-0.0117063	-0.0187954	0.000298284	0.937158	0.810214	0.0259267	0.936811	0.826348	0.0222305	0	0.640817	241200	0	0
528870	cg12382960	chr14	81672132	-	0.946789	0.955227	-0.00843877	-0.0126686	0.000301028	0.973315	0.877884	0.0149264	0.974342	0.929401	0.0122867	0	0.640817	295690	0	0
516849	cg14667748	chr14	32800811	-	0.949057	0.957045	-0.00798785	-0.0119662	0.000301451	0.977063	0.910565	0.0136536	0.974221	0.938079	0.00904176	0	0.640817	303909	0	0
373316	cg07986741	chr9	132515466	+	0.0604461	0.0554989	0.00494722	0.10505	0.000301641	0.0922603	0.0349659	0.0106763	0.0752084	0.0321421	0.00959711	0	0.640817	198139	0	0
75654	cg01312393	chr2	16081478	-	0.0197384	0.0223809	-0.00264249	-0.122816	0.000302048	0.052169	0.00465994	0.00874563	0.0485337	0.00857954	0.00902018	0	0.640817	327327	0	0
41490	cg12345706	chr1	145541525	-	0.921394	0.924431	-0.0030365	-0.00469578	0.000302216	0.96051	0.853862	0.0213434	0.951994	0.883399	0.0162348	0	0.640817	452282	0	0
661918	cg06952310	chr19	19327990	+	0.761256	0.79355	-0.0322943	-0.0591785	0.000303258	0.914852	0.500075	0.0883246	0.939599	0.600027	0.0881535	0	0.640817	95694	0	0
486730	cg18800161	chr12	116971933	-	0.0489364	0.0549005	-0.00596408	-0.13907	0.000303592	0.0714816	0.0266711	0.01014	0.0812678	0.0328494	0.0105941	0	0.640817	163420	0	0
405968	cg02578664	chr10	115325914	+	0.936382	0.942268	-0.00588605	-0.00894509	0.000304047	0.971178	0.898898	0.0158793	0.968864	0.902338	0.0177733	0	0.640817	347980	0	0
685354	cg06647001	chr20	23077908	-	0.948214	0.952317	-0.00410223	-0.00616317	0.000305127	0.969	0.931298	0.00933549	0.969494	0.932307	0.00903479	0	0.640817	407452	0	0
481685	cg09767187	chr12	103968395	-	0.960151	0.965251	-0.00510065	-0.00756523	0.000305131	0.980692	0.912689	0.011739	0.986248	0.949003	0.00921679	0	0.640817	374492	0	0
667711	cg24939980	chr19	40476778	-	0.0401904	0.0379829	0.0022075	0.0648912	0.000305738	0.0663727	0.0218915	0.0082428	0.0530428	0.0197771	0.00818664	0	0.640817	366202	0	0
195851	cg04384969	chr4	164038270	-	0.915848	0.922868	-0.00701968	-0.0108971	0.000306798	0.948299	0.878343	0.0156397	0.950253	0.889704	0.0135894	0	0.640817	317707	0	0
330999	cg09222674	chr8	27471955	-	0.0121707	0.0170923	-0.00492156	-0.289226	0.000309938	0.0486586	0.00118596	0.00732154	0.0502775	0.00380088	0.00978349	0	0.640817	199198	0	0
109571	cg03012876	chr2	179315436	-	0.0628883	0.0587196	0.00416874	0.0849665	0.000310318	0.0877356	0.0367221	0.00893351	0.0791484	0.0411124	0.00963119	0	0.640817	231657	0	0
88521	cg17101703	chr2	69793701	+	0.443046	0.414882	0.0281641	0.0925955	0.00031204	0.614199	0.305592	0.0593055	0.503296	0.239739	0.0568599	0	0.640817	46597	0	0
441318	cg00211630	chr11	74022875	+	0.152987	0.18234	-0.0293526	-0.238899	0.000312889	0.349921	0.0655219	0.0548756	0.341138	0.101515	0.0632432	0	0.640817	6931	0	0
566018	cg07870479	chr16	1813987	+	0.936561	0.941928	-0.00536704	-0.00815703	0.00031373	0.963877	0.904481	0.0115517	0.962837	0.913822	0.0134279	0	0.640817	362445	0	0
667476	cg26801047	chr19	39989258	+	0.0355143	0.0243813	0.011133	0.404695	0.000314072	0.0925086	0.0069483	0.0162092	0.0518051	0.00243826	0.0146049	0	0.640817	69618	0	0
492490	cg19428683	chr12	131104528	+	0.873364	0.884797	-0.0114333	-0.0185528	0.000315323	0.910194	0.826823	0.0187174	0.91739	0.836888	0.0204737	0	0.640817	242918	0	0
274210	cg03762694	chr6	134499419	-	0.0163144	0.0187102	-0.00239587	-0.125715	0.000316251	0.0357502	0.00642814	0.00491833	0.0327035	0.00685052	0.00620627	0	0.640817	348270	0	0
539075	cg18560144	chr15	25230200	+	0.925927	0.940436	-0.0145081	-0.0221922	0.000318406	0.962865	0.801474	0.0302295	0.970348	0.879264	0.0169185	0	0.640817	219750	0	0
99028	cg11264521	chr2	120770700	-	0.0254103	0.0223205	0.00308975	0.131717	0.000318463	0.0477755	0.00791001	0.00773597	0.0374681	0.00286582	0.00744697	0	0.640817	293992	0	0
102298	cg03608167	chr2	136875637	-	0.00811255	0.00998744	-0.00187489	-0.142104	0.000318663	0.0161205	0.00345693	0.00267252	0.0165478	0.00518918	0.00288834	0	0.640817	400882	0	0
139920	cg18017827	chr3	51574838	+	0.931469	0.936662	-0.0051937	-0.00793689	0.000319554	0.955998	0.889148	0.0145962	0.964459	0.902702	0.015791	0	0.640817	366707	0	0
258266	cg00106211	chr6	36514552	+	0.0152501	0.018584	-0.00333392	-0.17892	0.000321378	0.0293062	0.00536882	0.00549889	0.0413119	0.00920379	0.00731165	0	0.640817	277791	0	0
150168	cg12114129	chr3	119776654	-	0.943406	0.952131	-0.00872562	-0.0131436	0.00032226	0.967688	0.903026	0.0127385	0.971067	0.928581	0.0118363	0	0.640817	290420	0	0
20255	cg10709343	chr1	36023892	+	0.10251	0.0965961	0.00591341	0.0778923	0.000322382	0.155265	0.0571469	0.0164142	0.125934	0.0593658	0.014927	0	0.640817	164959	0	0
38971	cg24491364	chr1	112408123	-	0.902293	0.916434	-0.014141	-0.022191	0.000322483	0.948625	0.784328	0.0304055	0.95217	0.871083	0.0190065	0	0.640817	219759	0	0
147347	cg11364645	chr3	101405397	+	0.00751824	0.00933718	-0.00181894	-0.14252	0.000323055	0.0174491	0.00197079	0.00270918	0.0177345	0.00388245	0.00310493	0	0.640817	407256	0	0
223362	cg05861073	chr5	132377238	-	0.878689	0.899068	-0.0203783	-0.0327085	0.000325739	0.935994	0.740304	0.0347834	0.951577	0.844958	0.0276147	0	0.640817	170507	0	0
488784	cg03963023	chr12	121925225	-	0.968974	0.971913	-0.00293867	-0.00432418	0.000325797	0.981861	0.951798	0.00660047	0.983777	0.95874	0.00663899	0	0.640817	465676	0	0
577838	cg04432594	chr16	34408014	-	0.921673	0.93095	-0.00927677	-0.014294	0.000325965	0.959963	0.859962	0.0220657	0.959355	0.89487	0.0163267	0	0.640817	278366	0	0
175468	cg01536355	chr4	10624057	+	0.95618	0.962706	-0.00652537	-0.00971088	0.000326136	0.982148	0.920232	0.0116217	0.984258	0.940376	0.00888558	0	0.640817	335230	0	0
600092	cg27146152	chr17	6659364	+	0.00313297	0.00373128	-0.000598312	-0.0642732	0.000326581	0.00718159	0.000891431	0.00130444	0.00740841	0.00132644	0.00152141	0	0.640817	597046	0	0
398878	cg14137922	chr10	91315680	-	0.961132	0.968061	-0.00692927	-0.0102574	0.000328273	0.979949	0.916082	0.0130133	0.982944	0.943793	0.0109726	0	0.640817	326850	0	0
530574	cg09262217	chr14	91819321	-	0.951674	0.943136	0.00853849	0.0128666	0.000328311	0.976314	0.91604	0.0121945	0.969095	0.874475	0.0185559	0	0.640817	293467	0	0
282559	cg08381955	chr6	168226576	+	0.0239399	0.0298961	-0.00595616	-0.233264	0.000328996	0.0612533	0.00527031	0.0108061	0.0801718	0.00823248	0.0136055	0	0.640817	163653	0	0
114971	cg26690843	chr2	209259634	+	0.931095	0.936791	-0.00569524	-0.00870447	0.000329137	0.960739	0.887323	0.0130964	0.965709	0.905737	0.0138658	0	0.640817	352208	0	0
35938	cg20701556	chr1	95698924	+	0.626183	0.551448	0.074735	0.180289	0.000331434	0.854366	0.31026	0.118472	0.727542	0.304335	0.109192	0	0.640817	7424	0	0
218510	cg11458134	chr5	102091118	+	0.0251122	0.0284291	-0.00331692	-0.130228	0.000331479	0.0441617	0.0116237	0.0065813	0.0403096	0.0165408	0.00639632	0	0.640817	278893	0	0
443844	cg25820704	chr11	85338771	+	0.0175432	0.0146999	0.00284321	0.157186	0.000331498	0.0337939	0.00890216	0.00460799	0.0281105	0.00836311	0.00466445	0	0.640817	311632	0	0
575865	cg16178169	chr16	29827187	-	0.0114694	0.0141849	-0.00271548	-0.171823	0.000331809	0.0225198	0.00477479	0.00392028	0.0285104	0.00553137	0.00527546	0	0.640817	321440	0	0
427525	cg09504080	chr11	43965126	+	0.0842657	0.0984214	-0.0141557	-0.201845	0.000332213	0.174092	0.0387131	0.0307403	0.180924	0.0353885	0.0321583	0	0.640817	44810	0	0
409283	cg03499943	chr10	126211704	-	0.90879	0.868405	0.0403848	0.0648486	0.000333624	0.976168	0.752573	0.0486718	0.961277	0.693741	0.0646176	0	0.640817	84800	0	0
334104	cg01238526	chr8	41139049	+	0.919524	0.927983	-0.00845956	-0.0130705	0.000334215	0.958758	0.872593	0.0190066	0.958223	0.890307	0.0175828	0	0.640817	291213	0	0
111576	cg19699264	chr2	192701019	-	0.96827	0.971161	-0.00289083	-0.00425694	0.000334625	0.984387	0.941648	0.0080467	0.984709	0.956648	0.0071883	0	0.640817	468277	0	0
515484	cg25152855	chr14	24642358	+	0.929845	0.935391	-0.00554553	-0.00848757	0.000334655	0.956217	0.883806	0.0151899	0.962604	0.902127	0.0143731	0	0.640817	356217	0	0
376981	cg27063739	chr9	139377525	+	0.0183803	0.0132948	0.00508544	0.284879	0.000334973	0.0431853	0.00157694	0.00782975	0.0288416	0.00111197	0.00684077	0	0.640817	192860	0	0
472824	cg07262201	chr12	56617926	-	0.0159918	0.0183302	-0.0023384	-0.124284	0.000335972	0.0266829	0.00700987	0.00431647	0.026104	0.0114157	0.00368147	0	0.640817	353627	0	0
562029	cg11640175	chr15	99789939	+	0.169116	0.229989	-0.0608734	-0.422077	0.000336146	0.58532	0.0372841	0.105267	0.5477	0.0575119	0.137981	0	0.640817	375	0	0
586382	cg21228284	chr16	72127518	+	0.00955307	0.0116962	-0.00214311	-0.150046	0.000336665	0.0236133	0.00381807	0.00323448	0.0192131	0.00503984	0.00330069	0	0.640817	372550	0	0
122682	cg19308678	chr2	237895621	+	0.966151	0.969492	-0.0033409	-0.00492923	0.000337517	0.979843	0.94284	0.00765558	0.985132	0.954877	0.00738511	0	0.640817	444262	0	0
568217	cg05754148	chr16	3507555	-	0.0341118	0.0263378	0.00777399	0.279693	0.000337859	0.104646	0.0100685	0.018031	0.056431	0.0100797	0.0121348	0	0.640817	118918	0	0
200919	cg19574479	chr5	525440	+	0.520712	0.574716	-0.0540042	-0.139807	0.000340084	0.809364	0.169542	0.129926	0.826933	0.370638	0.107177	0	0.640817	16984	0	0
163675	cg15205746	chr3	182841949	+	0.82614	0.813512	0.0126281	0.021955	0.000342298	0.917068	0.667668	0.0506642	0.898351	0.685417	0.0531653	0	0.640817	221193	0	0
113094	cg09584003	chr2	202006589	+	0.963708	0.966847	-0.00313885	-0.00464321	0.000343337	0.978463	0.943328	0.00753226	0.981075	0.947687	0.00782652	0	0.640817	454163	0	0
463112	cg16726532	chr12	19692444	+	0.658659	0.632175	0.0264834	0.0583028	0.00034432	0.791033	0.509697	0.0615199	0.732707	0.416818	0.0678391	0	0.640817	97440	0	0
326848	cg23972785	chr8	11611189	+	0.86237	0.842366	0.020004	0.0334671	0.000344996	0.940732	0.739008	0.0409869	0.911399	0.682557	0.0548861	0	0.640817	167607	0	0
401175	cg08203727	chr10	99342787	+	0.941225	0.945574	-0.00434852	-0.00658024	0.000345033	0.966677	0.918453	0.0100581	0.973085	0.924683	0.012464	0	0.640817	396828	0	0
291905	cg26104541	chr7	21788477	+	0.856736	0.875009	-0.0182725	-0.0300987	0.000345644	0.931507	0.732639	0.0343422	0.928762	0.817285	0.0277963	0	0.640817	181130	0	0
371924	cg17613148	chr9	130497829	+	0.0156031	0.0176792	-0.00207608	-0.112483	0.000345878	0.0407037	0.00421606	0.00577727	0.0299591	0.00854309	0.00559526	0	0.640817	379271	0	0
49685	cg25062184	chr1	167088558	+	0.913426	0.921676	-0.00825013	-0.0128322	0.000345976	0.94529	0.862599	0.015565	0.947846	0.891663	0.0156694	0	0.640817	293865	0	0
372296	cg04561418	chr9	130864313	-	0.967311	0.971156	-0.00384445	-0.005664	0.000346284	0.980941	0.947928	0.00710122	0.985634	0.957538	0.00793868	0	0.640817	421255	0	0
643628	cg11671621	chr18	60258745	+	0.84974	0.825185	0.024555	0.0418046	0.000346434	0.93571	0.734388	0.0383358	0.916235	0.66855	0.0539197	0	0.640817	139415	0	0
616592	cg24948406	chr17	46608268	-	0.967742	0.971188	-0.00344656	-0.00507659	0.000347008	0.985135	0.949756	0.00821395	0.983118	0.95586	0.00650236	0	0.640817	439357	0	0
168576	cg05419984	chr3	196438463	+	0.0388088	0.0459941	-0.00718526	-0.198133	0.000347108	0.107651	0.0088964	0.0151495	0.121586	0.0188343	0.0188177	0	0.640817	131518	0	0
337471	cg03336500	chr8	61086216	+	0.882644	0.890522	-0.0078783	-0.0126771	0.000348873	0.922486	0.848016	0.0158711	0.92594	0.857705	0.0175408	0	0.640817	295591	0	0
606715	cg05898602	chr17	26646107	-	0.0143131	0.0173989	-0.00308578	-0.172383	0.000350955	0.0296394	0.00544152	0.00457646	0.0286761	0.00802266	0.0045623	0	0.640817	294261	0	0
285704	cg20496693	chr7	1177635	+	0.0231201	0.0314719	-0.00835188	-0.32443	0.000352148	0.0680974	0.00505349	0.0131308	0.0900012	0.0113353	0.0206007	0	0.640817	108161	0	0
602721	cg15664943	chr17	9874188	+	0.940787	0.927597	0.0131901	0.0201543	0.000353132	0.967832	0.86941	0.0184642	0.965826	0.877131	0.0196249	0	0.640817	232209	0	0
664355	cg00002559	chr19	34919659	-	0.046277	0.0519569	-0.00567993	-0.13872	0.000353466	0.0815578	0.0146746	0.0136478	0.11002	0.0180769	0.0149869	0	0.640817	172252	0	0
562678	cg10209823	chr15	101589127	+	0.941884	0.946617	-0.00473293	-0.00715555	0.000354798	0.968211	0.901396	0.0109046	0.966762	0.918221	0.0138507	0	0.640817	383261	0	0
411306	cg08891933	chr10	131825406	+	0.950616	0.944542	0.00607431	0.00915164	0.000355692	0.973613	0.922915	0.00924387	0.973177	0.909248	0.0120381	0	0.640817	344407	0	0
479533	cg08726818	chr12	94092011	-	0.948734	0.958939	-0.0102044	-0.0152743	0.000356559	0.984151	0.894716	0.0171701	0.984815	0.914145	0.0163603	0	0.640817	269230	0	0
544420	cg22129639	chr15	43785364	+	0.0175962	0.020885	-0.00328887	-0.16244	0.000357828	0.0438512	0.000836189	0.00872568	0.0460505	0.00283841	0.00937553	0	0.640817	280668	0	0
65955	cg17276863	chr1	230991708	+	0.963715	0.966731	-0.00301582	-0.00446145	0.00035818	0.979057	0.922015	0.00896179	0.984311	0.942307	0.00940376	0	0.640817	460683	0	0
290110	cg09195780	chr7	7811979	+	0.939459	0.940275	-0.000815454	-0.00123854	0.000359519	0.972941	0.844603	0.0243064	0.976523	0.853913	0.0271566	0	0.640817	631573	0	0
179349	cg14426001	chr4	40751717	-	0.0636268	0.0707287	-0.00710187	-0.13285	0.000359957	0.15666	0.0141978	0.0274671	0.153214	0.0427381	0.0220732	0	0.640817	133488	0	0
163206	cg10358197	chr3	180456625	+	0.950988	0.954465	-0.00347695	-0.00521039	0.000360783	0.973636	0.901443	0.0140187	0.980621	0.921726	0.0135162	0	0.640817	435067	0	0
80	cg06531475	chr1	870791	-	0.389462	0.339792	0.0496699	0.191561	0.000363452	0.707283	0.136921	0.127071	0.561006	0.173176	0.0960528	0	0.640817	5941	0	0
306549	cg15972516	chr7	98545950	+	0.973068	0.975332	-0.00226415	-0.00331892	0.000364007	0.985034	0.953683	0.00624605	0.986514	0.961381	0.00616443	0	0.640817	508308	0	0
143860	cg06555256	chr3	66405978	+	0.901968	0.913159	-0.0111914	-0.0175966	0.000364095	0.966079	0.773141	0.043106	0.975307	0.787644	0.0381591	0	0.640817	249919	0	0
374456	cg21224977	chr9	135037343	-	0.187721	0.177498	0.0102236	0.0765956	0.000364744	0.235013	0.139603	0.016098	0.215561	0.149813	0.0161649	0	0.640817	80136	0	0
122299	cg16901958	chr2	236945083	-	0.970473	0.972616	-0.00214341	-0.00315044	0.000365301	0.983884	0.956603	0.00531617	0.980371	0.960717	0.00515296	0	0.640817	516376	0	0
385656	cg19706697	chr10	24746103	+	0.418081	0.37624	0.0418409	0.148386	0.000367299	0.582673	0.259656	0.0726936	0.501813	0.239188	0.0613364	0	0.640817	14133	0	0
218432	cg06122361	chr5	100682581	+	0.965374	0.970773	-0.00539874	-0.00796337	0.000367302	0.981795	0.94017	0.00947741	0.984669	0.950058	0.0096837	0	0.640817	366200	0	0
426108	cg12403841	chr11	34128306	+	0.638256	0.678137	-0.0398807	-0.0861315	0.000368898	0.770038	0.497627	0.0513791	0.749733	0.604044	0.0367787	0	0.640817	53644	0	0
548367	cg17011981	chr15	60287397	-	0.0155459	0.0190071	-0.00346126	-0.183317	0.00036902	0.034393	0.00596734	0.0052765	0.0319236	0.00610914	0.00635597	0	0.640817	269856	0	0
355158	cg25344017	chr8	145509651	+	0.904419	0.915637	-0.0112186	-0.017592	0.000369376	0.937078	0.853378	0.0179215	0.943613	0.880281	0.0141797	0	0.640817	249950	0	0
170214	cg14525473	chr4	1161319	-	0.0342619	0.0502112	-0.0159493	-0.443968	0.000370025	0.147311	0.00228849	0.0241297	0.204775	0.0155961	0.0455792	0	0.640817	34863	0	0
164222	cg17716757	chr3	183911358	-	0.955929	0.961981	-0.0060524	-0.00901156	0.000370955	0.975421	0.934484	0.00907638	0.97688	0.942353	0.00886195	0	0.640817	346824	0	0
619750	cg27293471	chr17	55200459	+	0.96666	0.968797	-0.00213701	-0.00315328	0.000371301	0.979721	0.948026	0.00698461	0.98469	0.953254	0.00820565	0	0.640817	516233	0	0
515247	cg05171021	chr14	24422749	+	0.0181592	0.0208435	-0.0026843	-0.13136	0.000371384	0.0543443	0.00606199	0.00852047	0.0692024	0.00787328	0.0106853	0	0.640817	323940	0	0
31586	cg14025652	chr1	68698718	+	0.0365252	0.0413136	-0.00478843	-0.14133	0.000371623	0.10755	0.00569402	0.0164237	0.0935735	0.0120555	0.0160997	0	0.640817	204448	0	0
374071	cg11110196	chr9	134163973	-	0.126211	0.120741	0.00546999	0.0591312	0.000371757	0.241646	0.0634082	0.0336784	0.222108	0.0657798	0.0339351	0	0.640817	179184	0	0
478767	cg06565099	chr12	90184079	+	0.828364	0.805469	0.0228954	0.0399474	0.000372762	0.914966	0.703862	0.0453905	0.917228	0.686287	0.0502913	0	0.640817	145128	0	0
372849	cg09431062	chr9	131790499	+	0.00828323	0.0103046	-0.0020214	-0.151288	0.000373074	0.0207132	0.000400834	0.00498624	0.0217749	0.0012451	0.00506742	0	0.640817	385031	0	0
330188	cg13568950	chr8	24858463	+	0.0127914	0.0143723	-0.00158095	-0.096756	0.000375553	0.0343588	0.00360257	0.00583678	0.0258962	0.00490773	0.00450382	0	0.64246	436478	0	0
353737	cg12274478	chr8	144259770	+	0.962878	0.967264	-0.00438586	-0.00648924	0.000375803	0.984624	0.916732	0.0106595	0.985284	0.944678	0.0105102	0	0.64246	399047	0	0
564076	cg13372290	chr16	734663	-	0.0993489	0.0939611	0.00538785	0.0728955	0.000377485	0.178701	0.0554407	0.0209521	0.151188	0.058597	0.0221489	0	0.643817	181979	0	0
369697	cg08339189	chr9	124260498	+	0.0550562	0.0598913	-0.0048351	-0.103426	0.000378804	0.10391	0.0282459	0.0132625	0.0977814	0.0318241	0.0162773	0	0.64455	202569	0	0
568292	cg25416829	chr16	3564569	-	0.941286	0.946189	-0.00490305	-0.00741674	0.000380057	0.962566	0.91099	0.0104866	0.964615	0.923042	0.00924335	0	0.645168	377577	0	0
481781	cg02876747	chr12	104301468	-	0.912056	0.919792	-0.00773565	-0.0120531	0.000381406	0.96428	0.81549	0.0290663	0.970209	0.820235	0.0284404	0	0.645527	302854	0	0
171597	cg04721863	chr4	2623018	+	0.96592	0.968127	-0.00220666	-0.0032584	0.00038267	0.983852	0.935535	0.00762606	0.98097	0.948628	0.00719029	0	0.645527	511149	0	0
81757	cg18008766	chr2	38978896	-	0.17899	0.15646	0.0225296	0.183131	0.000384155	0.374635	0.0753875	0.0573772	0.255866	0.0643668	0.0486463	0	0.645527	15009	0	0
397822	cg12757181	chr10	88025053	+	0.969992	0.973299	-0.0033077	-0.00486123	0.000384883	0.983025	0.947641	0.00657199	0.985807	0.961813	0.00569236	0	0.645527	446490	0	0
374928	cg14194263	chr9	136075669	+	0.237101	0.205402	0.0316984	0.198066	0.000385766	0.477094	0.0738454	0.0844587	0.358563	0.0811332	0.0769727	0	0.645527	5340	0	0
283562	cg18232042	chr6	169633282	-	0.970556	0.972561	-0.00200517	-0.00294719	0.000386741	0.983832	0.951951	0.00652598	0.983429	0.956851	0.00578041	0	0.645527	526479	0	0
460698	cg00771108	chr12	8843741	+	0.98779	0.989056	-0.00126628	-0.00182974	0.000387122	0.994941	0.975654	0.00412837	0.99482	0.977681	0.00339622	0	0.645527	591288	0	0
624953	cg16557906	chr17	72436751	-	0.937237	0.941959	-0.00472173	-0.00717359	0.000387393	0.96227	0.89724	0.0109755	0.963402	0.919532	0.0122409	0	0.645527	382841	0	0
681756	cg19476186	chr20	3869959	-	0.022744	0.024563	-0.00181905	-0.0780001	0.000390332	0.0453069	0.0108967	0.00544595	0.0383622	0.0147868	0.00615782	0	0.647944	407238	0	0
132871	cg04452478	chr3	31753853	+	0.975493	0.979311	-0.00381794	-0.00557841	0.000391005	0.990078	0.954583	0.00652522	0.987751	0.965807	0.00565254	0	0.647944	423805	0	0
78224	cg03798217	chr2	26567396	+	0.907968	0.917513	-0.00954526	-0.014924	0.000393132	0.950775	0.808513	0.0260805	0.953987	0.872937	0.0219554	0	0.647944	272454	0	0
175186	cg24414019	chr4	8640896	+	0.766405	0.712161	0.0542443	0.104489	0.000394242	0.902346	0.559648	0.0703713	0.875238	0.534602	0.0957056	0	0.647944	35917	0	0
560088	cg16663063	chr15	91813826	+	0.94471	0.933591	0.0111192	0.0169012	0.000394637	0.977325	0.855278	0.0186239	0.962043	0.827258	0.0254514	0	0.647944	255275	0	0
293160	cg17061191	chr7	26541195	-	0.963346	0.967508	-0.00416259	-0.00615665	0.000394974	0.983409	0.940927	0.00913174	0.98314	0.949541	0.00906881	0	0.647944	407609	0	0
137452	cg01369817	chr3	47435787	-	0.978662	0.981161	-0.0024987	-0.0036416	0.000395471	0.991927	0.960071	0.00711241	0.993131	0.963197	0.00740919	0	0.647944	493424	0	0
694687	cg23117699	chr20	50416976	+	0.0123591	0.0144694	-0.00211032	-0.130118	0.000396199	0.0275476	0.00517214	0.00374952	0.0249847	0.00756046	0.00435248	0	0.647944	375934	0	0
413970	cg06795636	chr10	135190247	-	0.979861	0.982636	-0.00277455	-0.00403818	0.000396889	0.991484	0.961249	0.00525387	0.992579	0.97231	0.00521944	0	0.647944	476824	0	0
449473	cg09862428	chr11	116709382	-	0.939856	0.947378	-0.00752174	-0.0113795	0.000398071	0.965634	0.903309	0.0140691	0.973398	0.924689	0.0143146	0	0.648344	311255	0	0
299	cg01150641	chr1	976168	-	0.0307999	0.037361	-0.00656114	-0.215135	0.000398922	0.0643438	0.0091432	0.0112421	0.0678587	0.00996818	0.0116438	0	0.648344	146756	0	0
512509	cg17363387	chr13	114311898	-	0.951579	0.956063	-0.00448438	-0.00671246	0.000400813	0.970575	0.91544	0.0117352	0.974347	0.933247	0.0102224	0	0.648717	393532	0	0
421416	cg25759507	chr11	12008553	-	0.950815	0.956826	-0.0060109	-0.00899744	0.000400999	0.976592	0.901941	0.0122061	0.971649	0.935303	0.00797639	0	0.648717	347072	0	0
311087	cg03624735	chr7	116095140	+	0.919174	0.93385	-0.0146762	-0.0226091	0.000401837	0.960655	0.857805	0.0225848	0.967281	0.890108	0.0170689	0	0.648717	217333	0	0
202293	cg04998032	chr5	1798359	-	0.952707	0.955997	-0.00328987	-0.00492173	0.000403738	0.970014	0.930076	0.00809694	0.97132	0.938176	0.00891326	0	0.64918	444507	0	0
697619	cg03925413	chr20	60145120	-	0.927438	0.947008	-0.0195696	-0.029807	0.000404365	0.980015	0.71387	0.0496884	0.964552	0.900541	0.0168249	0	0.64918	182319	0	0
65932	cg12320196	chr1	230931088	+	0.859287	0.874915	-0.0156283	-0.0257069	0.000404811	0.901597	0.804828	0.0193306	0.913428	0.826821	0.0177178	0	0.64918	200861	0	0
419524	cg05393484	chr11	6818466	+	0.95974	0.964354	-0.00461406	-0.00684811	0.00040673	0.975824	0.927932	0.00900295	0.980281	0.944199	0.00802318	0	0.649919	390330	0	0
323246	cg26919723	chr8	330109	+	0.748131	0.729027	0.0191031	0.0368184	0.000409093	0.854047	0.603817	0.0529786	0.78836	0.602197	0.0466189	0	0.649919	155509	0	0
641963	cg06126571	chr18	52617021	-	0.958153	0.962723	-0.00456997	-0.00679392	0.000410193	0.977621	0.936594	0.00881189	0.975895	0.950094	0.00609372	0	0.649919	391589	0	0
35937	cg05382022	chr1	95698917	+	0.466254	0.410251	0.0560032	0.180481	0.000410226	0.715548	0.207272	0.102865	0.592067	0.19329	0.095273	0	0.649919	7397	0	0
133244	cg15498209	chr3	32908010	+	0.910382	0.922167	-0.0117849	-0.0183556	0.00041148	0.944257	0.852156	0.0195281	0.948654	0.88542	0.0151096	0	0.649919	244280	0	0
355362	cg06368857	chr8	145639880	+	0.876389	0.887718	-0.0113288	-0.018322	0.000412923	0.908989	0.835609	0.0185761	0.920827	0.850698	0.0193891	0	0.649919	244503	0	0
262653	cg01612730	chr6	48036280	+	0.0536185	0.0429642	0.0106542	0.264427	0.000414682	0.148627	0.0219026	0.0245707	0.0938792	0.0220994	0.017355	0	0.649919	74930	0	0
594800	cg02922808	chr16	89678825	-	0.907073	0.911358	-0.00428491	-0.00672511	0.000416641	0.929896	0.875462	0.0139195	0.933245	0.887747	0.0125833	0	0.649919	393244	0	0
4777	cg09136597	chr1	5946381	+	0.95794	0.962723	-0.00478266	-0.0071109	0.000416648	0.982235	0.928081	0.0101977	0.978217	0.94349	0.0100692	0	0.649919	384269	0	0
124631	cg01315621	chr2	241065850	-	0.973265	0.9773	-0.00403517	-0.00590848	0.00041687	0.985649	0.958261	0.00567277	0.989091	0.964168	0.00606981	0	0.649919	414264	0	0
447661	cg09860298	chr11	111168782	+	0.931352	0.937655	-0.00630354	-0.00962846	0.000418161	0.958303	0.899231	0.0115359	0.955969	0.91588	0.0107112	0	0.649919	336573	0	0
642779	cg07041327	chr18	56008827	-	0.982249	0.983966	-0.00171656	-0.00249366	0.000421045	0.991747	0.962657	0.00512484	0.992228	0.970434	0.00525279	0	0.649919	550906	0	0
263814	cg17366013	chr6	55009465	-	0.69935	0.710265	-0.010915	-0.0220302	0.000421592	0.757355	0.652244	0.0208555	0.765073	0.66902	0.0248751	0	0.649919	220710	0	0
402838	cg17283857	chr10	102989315	+	0.115921	0.0877212	0.0282003	0.365781	0.000423156	0.254031	0.0339254	0.0518065	0.179606	0.0318958	0.0383749	0	0.649919	7900	0	0
579502	cg05545914	chr16	51167855	-	0.0444666	0.0590293	-0.0145627	-0.341837	0.000423273	0.177285	0.0146407	0.0226519	0.207522	0.0222293	0.0435639	0	0.649919	42335	0	0
262548	cg11023565	chr6	47428069	-	0.974267	0.977365	-0.0030983	-0.00453421	0.000423612	0.98712	0.955277	0.00728644	0.989635	0.96209	0.00698079	0	0.649919	457975	0	0
88981	cg09586879	chr2	70900488	-	0.954694	0.957989	-0.00329514	-0.00491946	0.000424507	0.974441	0.932354	0.0085763	0.977343	0.935019	0.0106569	0	0.649919	444566	0	0
480622	cg16015543	chr12	98605243	-	0.93542	0.94115	-0.0057303	-0.00871795	0.000425563	0.961163	0.873481	0.0126686	0.957604	0.914425	0.0110826	0	0.649919	351983	0	0
161977	cg11549142	chr3	171872553	+	0.913496	0.918893	-0.00539729	-0.00840716	0.000426372	0.948563	0.865199	0.0167955	0.946475	0.877483	0.0163497	0	0.649919	357750	0	0
599949	cg07206676	chr17	6456371	+	0.918685	0.907672	0.0110123	0.0172097	0.000428534	0.963851	0.872988	0.0221021	0.949202	0.876347	0.0169492	0	0.649919	252904	0	0
330067	cg26522738	chr8	24261642	-	0.895132	0.903601	-0.00846858	-0.0134354	0.000428816	0.954874	0.807381	0.0306751	0.968311	0.805311	0.0356572	0	0.649919	287179	0	0
542058	cg06290138	chr15	38881520	-	0.897699	0.90984	-0.0121406	-0.0191684	0.000428899	0.947599	0.821896	0.0255999	0.949225	0.873106	0.0195426	0	0.649919	238735	0	0
170000	cg23802491	chr4	987312	-	0.861076	0.86979	-0.00871415	-0.0143609	0.000429654	0.929574	0.772176	0.0319945	0.924239	0.794596	0.0287625	0	0.649919	277709	0	0
367387	cg14235574	chr9	112080226	-	0.598745	0.648578	-0.0498328	-0.113516	0.000430435	0.756301	0.374822	0.0747002	0.772754	0.496318	0.0744908	0	0.649919	29517	0	0
589321	cg20729586	chr16	83433871	-	0.760482	0.72239	0.0380915	0.0731482	0.000431633	0.930771	0.389352	0.111122	0.893558	0.427387	0.109985	0	0.649919	71145	0	0
81298	cg07579311	chr2	37850131	-	0.945009	0.951951	-0.00694158	-0.0104484	0.00043171	0.978148	0.883377	0.0180953	0.982456	0.929458	0.0136652	0	0.649919	324024	0	0
315272	cg02786309	chr7	136089594	+	0.910853	0.919847	-0.00899472	-0.0140236	0.000431981	0.955049	0.816407	0.0234599	0.958554	0.884147	0.0189992	0	0.649919	281075	0	0
360768	cg08192812	chr9	38023267	-	0.953074	0.957383	-0.00430979	-0.00644171	0.000433123	0.976982	0.902906	0.0132826	0.975818	0.924397	0.0129241	0	0.649919	400233	0	0
594185	cg00739608	chr16	89205832	-	0.981494	0.984686	-0.00319208	-0.00463725	0.000433917	0.992024	0.969787	0.00557736	0.994033	0.975934	0.00475243	0	0.649919	454344	0	0
412126	cg23458898	chr10	133961710	+	0.885228	0.895242	-0.0100132	-0.016047	0.000434571	0.93359	0.804956	0.0244932	0.950637	0.844265	0.0235836	0	0.649919	262363	0	0
96978	cg19514230	chr2	109892206	+	0.967501	0.970727	-0.00322632	-0.00475389	0.000435509	0.982272	0.94951	0.00738207	0.982597	0.952356	0.00718511	0	0.649919	450189	0	0
258313	cg27644695	chr6	36607497	-	0.853861	0.866376	-0.0125146	-0.0207501	0.000435846	0.921161	0.768765	0.02917	0.905536	0.802955	0.0250537	0	0.649919	228433	0	0
615903	cg22674412	chr17	45056008	-	0.0496357	0.0438946	0.00574118	0.146038	0.000435865	0.10346	0.0240349	0.0148376	0.0689257	0.0276675	0.0114325	0	0.649919	170276	0	0
697998	cg21762585	chr20	60733723	+	0.974328	0.976391	-0.00206256	-0.00301987	0.000436268	0.986126	0.958277	0.0058823	0.988403	0.96172	0.00618493	0	0.649919	522810	0	0
146620	cg04180924	chr3	98272064	+	0.972397	0.977101	-0.00470366	-0.00689105	0.000437207	0.989197	0.938558	0.00932213	0.992531	0.960446	0.00796929	0	0.649919	389239	0	0
350565	cg14929805	chr8	134232964	+	0.967227	0.97083	-0.00360311	-0.00530955	0.000438676	0.981558	0.947404	0.0065248	0.981703	0.951827	0.00673694	0	0.649919	431950	0	0
607114	cg04213121	chr17	27054058	+	0.015197	0.0176806	-0.00248363	-0.135625	0.000439382	0.0262768	0.005179	0.0046468	0.0271594	0.00514323	0.00546279	0	0.649919	340551	0	0
116198	cg19675223	chr2	217560272	-	0.0596667	0.0696481	-0.00998141	-0.193171	0.000439787	0.142826	0.0278484	0.0190626	0.120119	0.0371002	0.0221617	0	0.649919	83137	0	0
281796	cg05624396	chr6	166759420	+	0.940934	0.948065	-0.00713035	-0.0107773	0.000440239	0.972741	0.893571	0.0166823	0.977415	0.910169	0.0168826	0	0.649919	319363	0	0
129843	cg27496117	chr3	13830636	+	0.51416	0.552924	-0.0387634	-0.102931	0.000443281	0.652745	0.356852	0.0573495	0.626473	0.457256	0.0401692	0	0.653079	37160	0	0
401807	cg19029325	chr10	101300506	+	0.0502054	0.0435227	0.00668272	0.169742	0.000444736	0.0949026	0.0258834	0.0130277	0.0719814	0.0226118	0.00978797	0	0.653893	143580	0	0
3531	cg14706825	chr1	3289925	+	0.93926	0.945926	-0.00666545	-0.0100948	0.00044704	0.967583	0.878363	0.017367	0.964449	0.91766	0.0127369	0	0.654391	329304	0	0
469165	cg05043645	chr12	50836089	-	0.955378	0.963941	-0.00856281	-0.0127402	0.000447771	0.981926	0.8983	0.0143343	0.983041	0.935929	0.0120222	0	0.654391	294893	0	0
373036	cg15406943	chr9	132044151	-	0.944638	0.947979	-0.00334188	-0.0050416	0.000447884	0.968224	0.918261	0.0105006	0.969683	0.922975	0.0108038	0	0.654391	440515	0	0
357259	cg12656557	chr9	9798357	+	0.939238	0.945193	-0.0059553	-0.00902287	0.000449338	0.980055	0.885369	0.0164975	0.9745	0.859309	0.0212681	0	0.654391	346628	0	0
460119	cg02826740	chr12	7088109	-	0.84948	0.862292	-0.0128128	-0.0213484	0.000449588	0.907889	0.778895	0.0260792	0.924949	0.820827	0.0263104	0	0.654391	224788	0	0
36684	cg16556008	chr1	101360663	+	0.011307	0.0165319	-0.0052249	-0.316401	0.000453345	0.0227668	0.00324249	0.00446105	0.0411091	0.00543857	0.00863201	0	0.656521	187785	0	0
8024	cg02073122	chr1	10960517	+	0.891607	0.902194	-0.0105862	-0.0168406	0.000453622	0.934021	0.84041	0.0194735	0.932404	0.870403	0.0167394	0	0.656521	255770	0	0
363408	cg13786031	chr9	91424986	+	0.718282	0.666351	0.0519313	0.106726	0.000453769	0.896666	0.48926	0.0760981	0.833865	0.479553	0.0775929	0	0.656521	34152	0	0
590011	cg11029830	chr16	84652429	-	0.449617	0.442225	0.0073927	0.0233936	0.000457617	0.67566	0.277634	0.0633551	0.602395	0.341975	0.0582746	0	0.658996	212913	0	0
200771	cg22327703	chr5	445852	-	0.973615	0.976254	-0.00263869	-0.00386505	0.000458162	0.984325	0.956528	0.00553768	0.987931	0.962193	0.00647998	0	0.658996	483924	0	0
410411	cg20407834	chr10	129797019	-	0.884891	0.911138	-0.0262472	-0.0417056	0.000458736	0.972951	0.641312	0.0691846	0.962421	0.805618	0.04268	0	0.658996	139706	0	0
403265	cg02696879	chr10	103880708	+	0.00616205	0.00684431	-0.00068226	-0.0596511	0.000461001	0.012945	0.00209303	0.00217602	0.0137612	0.00334818	0.00235001	0	0.658996	580681	0	0
644401	cg15081561	chr18	66504226	+	0.95625	0.960042	-0.00379149	-0.00564994	0.000461518	0.976176	0.926455	0.0100507	0.975462	0.938776	0.00899175	0	0.658996	421674	0	0
7845	cg24293689	chr1	10732356	+	0.950551	0.943908	0.00664277	0.0100117	0.00046432	0.983933	0.902853	0.0151424	0.980158	0.892059	0.0210951	0	0.658996	330603	0	0
601776	cg06271327	chr17	8062512	-	0.939027	0.943577	-0.00455046	-0.006901	0.000466911	0.962408	0.911604	0.0103881	0.959612	0.924914	0.0097557	0	0.658996	389035	0	0
7402	cg09146155	chr1	9946347	-	0.936806	0.944844	-0.00803823	-0.0121965	0.000468543	0.966014	0.878827	0.0156989	0.975214	0.912683	0.0136673	0	0.658996	301139	0	0
398043	cg00127176	chr10	88545884	+	0.928232	0.947813	-0.0195804	-0.0297984	0.000468725	0.971598	0.759675	0.0331081	0.983962	0.906275	0.0162366	0	0.658996	182357	0	0
497848	cg18247090	chr13	30062835	-	0.92421	0.9289	-0.00468977	-0.00722427	0.000470146	0.966621	0.85305	0.0193795	0.962751	0.872199	0.0199348	0	0.658996	381781	0	0
291952	cg08235624	chr7	22016008	-	0.948632	0.957505	-0.00887296	-0.013292	0.000471947	0.974996	0.904644	0.0147362	0.977392	0.917493	0.0132595	0	0.658996	288770	0	0
632360	cg11950105	chr17	80050646	-	0.978131	0.979564	-0.0014328	-0.00209041	0.000473189	0.988795	0.967795	0.00434498	0.986327	0.974366	0.00371765	0	0.658996	574631	0	0
473243	cg21922731	chr12	57157130	+	0.318796	0.30722	0.0115761	0.0517095	0.000473371	0.420159	0.230707	0.0361053	0.378375	0.233882	0.0322154	0	0.658996	112364	0	0
109437	cg23577800	chr2	178903588	+	0.973904	0.976229	-0.00232485	-0.0034049	0.000475022	0.983069	0.959923	0.0056643	0.987569	0.967277	0.00517561	0	0.658996	504242	0	0
353827	cg13439505	chr8	144341571	-	0.962489	0.965997	-0.00350814	-0.00519499	0.000475135	0.977613	0.943718	0.00675063	0.9781	0.946348	0.00855899	0	0.658996	435551	0	0
267013	cg24584488	chr6	88618959	+	0.89354	0.861071	0.0324687	0.0527976	0.000475869	0.977443	0.651334	0.0651477	0.960186	0.703639	0.0681931	0	0.658996	109724	0	0
492540	cg09932955	chr12	131184892	+	0.95308	0.957259	-0.00417965	-0.00624757	0.000475872	0.970016	0.932387	0.00823489	0.971018	0.936128	0.00862949	0	0.658996	405226	0	0
392484	cg09455274	chr10	68685487	+	0.458311	0.435798	0.0225132	0.0710774	0.000476228	0.763594	0.186512	0.107047	0.681102	0.207537	0.0976024	0	0.658996	74413	0	0
129249	cg08947125	chr3	12802515	+	0.953694	0.957636	-0.00394202	-0.00588935	0.000479223	0.970062	0.936473	0.00867528	0.972656	0.932417	0.00718882	0	0.658996	414779	0	0
100075	cg09961427	chr2	127457493	+	0.980006	0.982902	-0.00289653	-0.00421484	0.000480196	0.992389	0.963077	0.00640917	0.992441	0.97487	0.00427733	0	0.658996	469902	0	0
105456	cg19506623	chr2	161265259	+	0.943554	0.934804	0.00874998	0.0132995	0.000481036	0.972493	0.885337	0.0151907	0.966584	0.860056	0.0212611	0	0.658996	288697	0	0
150269	cg02351971	chr3	120130716	-	0.910563	0.918373	-0.00781036	-0.0121887	0.000481574	0.942431	0.872696	0.0154234	0.940998	0.881143	0.0174096	0	0.658996	301254	0	0
603370	cg14240829	chr17	13086394	-	0.395545	0.457869	-0.0623243	-0.206243	0.000481649	0.648267	0.128171	0.0923959	0.784639	0.318784	0.0945019	0	0.658996	4488	0	0
413367	cg07039130	chr10	134859973	+	0.874809	0.858335	0.0164743	0.0271148	0.000482102	0.940603	0.803996	0.028408	0.905369	0.748987	0.0344581	0	0.658996	194163	0	0
237303	cg12181484	chr5	177723664	+	0.959465	0.964385	-0.00492022	-0.00730343	0.00048496	0.976121	0.938921	0.00766005	0.976252	0.948271	0.00786252	0	0.658996	380076	0	0
608725	cg11897625	chr17	31611109	+	0.628235	0.605945	0.0222899	0.051286	0.000485041	0.775873	0.435174	0.0694376	0.730298	0.366225	0.0674604	0	0.658996	113403	0	0
414539	cg08200582	chr11	442649	-	0.678691	0.613767	0.0649235	0.142848	0.000486537	0.863003	0.458735	0.0895229	0.726891	0.383469	0.0843197	0	0.658996	15942	0	0
636666	cg19174643	chr18	13136426	-	0.0273606	0.0347283	-0.00736774	-0.259672	0.000486775	0.072218	0.00580461	0.0113091	0.0749184	0.0169761	0.0143928	0	0.658996	127442	0	0
278710	cg23628657	chr6	154756650	-	0.92024	0.926497	-0.0062566	-0.00967079	0.000486911	0.953341	0.871782	0.0176209	0.963386	0.900131	0.0158337	0	0.658996	335860	0	0
703609	cg04185676	chr21	37015294	-	0.885905	0.896016	-0.0101113	-0.0161913	0.000486998	0.925797	0.817003	0.0199684	0.935241	0.856917	0.0184144	0	0.658996	261194	0	0
142119	cg08989703	chr3	57619065	-	0.806301	0.78914	0.0171604	0.0306518	0.000489135	0.891506	0.712401	0.0393685	0.859769	0.688438	0.0407365	0	0.658996	178905	0	0
358351	cg12324242	chr9	21306373	-	0.865356	0.874388	-0.00903234	-0.0148101	0.000490301	0.92196	0.801142	0.0258388	0.913771	0.807522	0.0229268	0	0.658996	273440	0	0
559823	cg09112160	chr15	91424658	+	0.941578	0.949766	-0.00818808	-0.0123609	0.000491878	0.968827	0.903759	0.0123243	0.974087	0.930307	0.0102615	0	0.658996	299220	0	0
169836	cg07380286	chr4	894856	+	0.945513	0.949674	-0.00416093	-0.0062688	0.000493648	0.971213	0.916952	0.00985056	0.96544	0.928089	0.00851786	0	0.658996	404676	0	0
507379	cg04430472	chr13	99913409	-	0.947241	0.93409	0.0131512	0.019958	0.00049372	0.975616	0.902577	0.0162403	0.972363	0.808723	0.0272803	0	0.658996	233458	0	0
498576	cg20754145	chr13	32605902	+	0.00848789	0.00985699	-0.0013691	-0.103066	0.000502044	0.0171745	0.00261472	0.00294149	0.0194398	0.00461271	0.0033329	0	0.658996	465165	0	0
515574	cg08577238	chr14	24701499	+	0.017464	0.0213557	-0.00389175	-0.191188	0.000502553	0.0286882	0.00841841	0.0043662	0.0306584	0.011777	0.00511163	0	0.658996	245554	0	0
256758	cg08914800	chr6	33489324	-	0.93087	0.936486	-0.00561601	-0.00858577	0.000502793	0.95977	0.857863	0.0176542	0.964637	0.892397	0.0179314	0	0.658996	354387	0	0
525025	cg12848614	chr14	70193496	+	0.0623576	0.0544165	0.00794113	0.167715	0.00050375	0.145343	0.0301857	0.017068	0.0874044	0.0234072	0.0161397	0	0.658996	115685	0	0
622155	cg16047144	chr17	62097953	-	0.00818363	0.00901521	-0.000831586	-0.0645141	0.000504134	0.015833	0.00349751	0.00227922	0.0133079	0.0038936	0.0023005	0	0.658996	552885	0	0
500919	cg01016203	chr13	44681967	-	0.904385	0.894143	0.0102427	0.0162519	0.000506747	0.952341	0.827547	0.0242479	0.945737	0.791642	0.0283634	0	0.658996	260674	0	0
145497	cg12727680	chr3	75959386	-	0.891353	0.903289	-0.0119369	-0.0189806	0.000506939	0.948309	0.777945	0.0257838	0.947242	0.837357	0.0289356	0	0.658996	239984	0	0
120902	cg24936500	chr2	233499637	+	0.165477	0.158325	0.00715167	0.0600298	0.000509657	0.322052	0.0785812	0.0521877	0.267617	0.085279	0.0422152	0	0.658996	132278	0	0
28702	cg13115910	chr1	55840880	+	0.963445	0.966406	-0.00296101	-0.00438171	0.000509943	0.979875	0.939027	0.00803313	0.977405	0.956173	0.00641799	0	0.658996	463585	0	0
475314	cg07887163	chr12	65958288	+	0.919397	0.931386	-0.0119886	-0.0184907	0.000510571	0.95508	0.869019	0.0181586	0.957833	0.888185	0.0163693	0	0.658996	243356	0	0
635520	cg17338269	chr18	9114772	-	0.836058	0.806954	0.0291041	0.0505019	0.000511779	0.925141	0.705878	0.0431865	0.889318	0.651638	0.0497459	0	0.658996	115301	0	0
108173	cg00488692	chr2	174877566	-	0.094853	0.0808895	0.0139635	0.206182	0.000511856	0.230325	0.0396216	0.0405327	0.151633	0.0455362	0.0212371	0	0.658996	46080	0	0
354409	cg27167922	chr8	144776463	+	0.97189	0.976031	-0.00414166	-0.00607257	0.000512624	0.986363	0.949687	0.00752715	0.988066	0.960293	0.00696468	0	0.658996	409834	0	0
597969	cg14730805	chr17	3117144	+	0.669576	0.615411	0.054165	0.11983	0.000514561	0.88674	0.398982	0.0915268	0.848866	0.376559	0.0917813	0	0.658996	25805	0	0
615119	cg09214551	chr17	43139717	-	0.830279	0.851397	-0.021118	-0.0358099	0.000518208	0.907688	0.734297	0.0401161	0.908952	0.757702	0.0345205	0	0.658996	158965	0	0
244023	cg16526287	chr6	15524865	+	0.972285	0.977003	-0.00471753	-0.00691211	0.000518742	0.987154	0.950392	0.00720802	0.988655	0.957638	0.00788871	0	0.658996	388793	0	0
67014	cg19905445	chr1	234743688	-	0.0112109	0.0127932	-0.00158228	-0.103796	0.000518867	0.021946	0.00358225	0.00382064	0.0274926	0.00663782	0.00503491	0	0.658996	436317	0	0
118068	cg10695376	chr2	220862056	+	0.308959	0.272362	0.0365973	0.175827	0.000519277	0.474179	0.161195	0.0703493	0.402004	0.176317	0.0590098	0	0.658996	8086	0	0
357891	cg04389426	chr9	16871106	-	0.00781551	0.0100442	-0.00222866	-0.170049	0.000519291	0.0217248	0.000941536	0.00423601	0.0220933	0.00150591	0.00570235	0	0.658996	364088	0	0
223886	cg21536585	chr5	133801528	-	0.0224269	0.0270631	-0.00463615	-0.19279	0.00051995	0.0391614	0.0119375	0.00535918	0.0406779	0.0184552	0.00627217	0	0.658996	210780	0	0
32056	cg06547552	chr1	74932800	+	0.874394	0.880895	-0.00650073	-0.0105657	0.000522931	0.925373	0.811669	0.0248904	0.929801	0.823696	0.0261587	0	0.658996	322371	0	0
472374	cg23184344	chr12	56211634	-	0.0260218	0.0236404	0.00238144	0.0986772	0.00052369	0.0405104	0.0157716	0.00532804	0.0390173	0.0142872	0.00539364	0	0.658996	349609	0	0
269511	cg27585618	chr6	108093747	+	0.926869	0.932884	-0.00601515	-0.0092332	0.000527551	0.956389	0.884662	0.0136791	0.956353	0.905248	0.0119363	0	0.658996	343038	0	0
85550	cg20299046	chr2	55647702	+	0.0120508	0.0141347	-0.0020839	-0.130278	0.000528308	0.0280001	0.00212159	0.00524126	0.0295934	0.0043465	0.00542914	0	0.658996	378512	0	0
345750	cg11186933	chr8	109455379	+	0.0131165	0.0182135	-0.00509698	-0.287461	0.000529699	0.0432213	0.00233921	0.00731302	0.0325256	0.00357288	0.00815138	0	0.658996	192477	0	0
258421	cg03060540	chr6	36764388	+	0.930245	0.941556	-0.0113112	-0.0172522	0.000530235	0.970388	0.872185	0.0182038	0.967108	0.903783	0.0158981	0	0.658996	252560	0	0
658184	cg15519565	chr19	13938243	+	0.88412	0.888859	-0.00473881	-0.00762605	0.000531625	0.92508	0.847882	0.0159279	0.9224	0.860524	0.016496	0	0.658996	373161	0	0
246859	cg01518607	chr6	27235891	+	0.0552209	0.0716929	-0.0164719	-0.324875	0.000531675	0.270156	0.00422308	0.0309867	0.273973	0.0261449	0.0494958	0	0.658996	32509	0	0
162353	cg14903659	chr3	174580202	-	0.901711	0.916738	-0.015027	-0.023585	0.00053263	0.95112	0.793778	0.0297041	0.953893	0.850174	0.0278169	0	0.658996	211845	0	0
304306	cg26365742	chr7	87503866	-	0.0425557	0.0516959	-0.00914022	-0.231328	0.000533434	0.138437	0.0124107	0.0198086	0.100773	0.0206184	0.0182749	0	0.658996	95131	0	0
273651	cg09035093	chr6	132181821	+	0.956758	0.962504	-0.00574673	-0.00855047	0.00053411	0.981404	0.924632	0.0119599	0.981455	0.931149	0.0120522	0	0.658996	355083	0	0
425166	cg25015206	chr11	31263681	-	0.858924	0.873096	-0.0141718	-0.02334	0.000534955	0.917061	0.762723	0.0325463	0.912407	0.803433	0.0268992	0	0.658996	213209	0	0
224147	cg02037307	chr5	134363562	-	0.169819	0.127788	0.0420314	0.384099	0.000536794	0.390025	0.0477141	0.0869257	0.316813	0.0510954	0.0584931	0	0.658996	1932	0	0
442971	cg27340269	chr11	77921422	+	0.815334	0.830594	-0.0152602	-0.0264314	0.000540104	0.862539	0.76717	0.0201498	0.857475	0.797887	0.0164525	0	0.658996	197309	0	0
529782	cg11988846	chr14	89858021	-	0.975361	0.977443	-0.0020821	-0.00304524	0.000540741	0.984544	0.96084	0.00476378	0.986382	0.967962	0.00448191	0	0.658996	521455	0	0
412309	cg03351491	chr10	134117359	-	0.915943	0.922513	-0.00656953	-0.0101997	0.000543385	0.942603	0.890048	0.0117253	0.948173	0.892149	0.012142	0	0.658996	327720	0	0
651240	cg17341326	chr19	3817039	-	0.983627	0.982185	0.00144177	0.0020949	0.000543528	0.992179	0.969473	0.00372456	0.99187	0.972083	0.00394429	0	0.658996	574367	0	0
6024	cg20313951	chr1	7622695	-	0.831353	0.844265	-0.0129124	-0.0219731	0.00054498	0.875475	0.786478	0.0215365	0.87697	0.793604	0.0199777	0	0.658996	221081	0	0
280520	cg11363108	chr6	160501266	+	0.939994	0.943506	-0.00351199	-0.00532361	0.000545337	0.963684	0.91625	0.00927847	0.960695	0.924131	0.00920823	0	0.658996	431533	0	0
616131	cg26281453	chr17	45810610	-	0.0338544	0.0314464	0.00240795	0.0814733	0.000548262	0.0504244	0.0202461	0.00614633	0.0431641	0.0166328	0.00714879	0	0.658996	347182	0	0
514940	cg16280098	chr14	23790882	-	0.255246	0.243007	0.0122389	0.068153	0.000549103	0.299577	0.197141	0.0221605	0.29555	0.175257	0.0228201	0	0.658996	79080	0	0
487959	cg26124670	chr12	120651829	+	0.957798	0.961479	-0.00368117	-0.0054771	0.00054994	0.976806	0.937099	0.00867429	0.975501	0.940845	0.00878884	0	0.658996	426834	0	0
363226	cg10926307	chr9	90321277	+	0.950887	0.95558	-0.00469363	-0.00702996	0.000550554	0.971052	0.915038	0.0108644	0.97407	0.927041	0.0119092	0	0.658996	386093	0	0
712955	cg13699626	chr22	26788007	-	0.961887	0.965129	-0.00324286	-0.00480577	0.000550811	0.979576	0.934244	0.00777967	0.982158	0.950517	0.00763704	0	0.658996	448381	0	0
664845	cg04169912	chr19	35791192	-	0.974033	0.970205	0.00382776	0.00562285	0.000551204	0.986708	0.958329	0.00526318	0.981933	0.938314	0.00830035	0	0.658996	422492	0	0
444057	cg07232711	chr11	85859878	-	0.906098	0.893208	0.0128899	0.0204435	0.000551375	0.977999	0.763083	0.0451311	0.9743	0.800751	0.0470887	0	0.658996	230469	0	0
611584	cg15597662	chr17	38297856	+	0.942858	0.94839	-0.00553254	-0.00835244	0.000552808	0.96804	0.887968	0.0148369	0.974833	0.899842	0.0167913	0	0.658996	358738	0	0
322505	cg03125463	chr7	158065077	+	0.870979	0.883878	-0.0128999	-0.0209718	0.00055361	0.942794	0.694348	0.0471865	0.950303	0.754904	0.0393074	0	0.658996	227036	0	0
490178	cg15082212	chr12	124068903	-	0.0174954	0.0197477	-0.0022523	-0.113588	0.000553812	0.029425	0.00660737	0.00483308	0.0284536	0.0118767	0.00398568	0	0.658996	361799	0	0
705504	cg11719297	chr21	43187083	-	0.225543	0.257678	-0.0321345	-0.184505	0.000554102	0.357799	0.12776	0.0435271	0.38364	0.147076	0.0496155	0	0.658996	6858	0	0
249460	cg06051311	chr6	30131001	+	0.121422	0.0968652	0.0245565	0.298411	0.000554523	0.293082	0.0462895	0.0440742	0.161361	0.0315044	0.0374354	0	0.658996	11835	0	0
123829	cg06035333	chr2	239962225	+	0.939105	0.942521	-0.0034159	-0.00518305	0.000555259	0.961093	0.903497	0.0101029	0.964085	0.919794	0.0111945	0	0.658996	435897	0	0
708078	cg12352984	chr21	46687249	+	0.955055	0.959403	-0.00434759	-0.00648477	0.000555936	0.975292	0.922994	0.0104576	0.976013	0.939701	0.00975569	0	0.658996	399161	0	0
672126	cg00254284	chr19	47501986	-	0.970154	0.963413	0.00674063	0.00995585	0.000558098	0.987978	0.943345	0.00754947	0.983373	0.933079	0.0106539	0	0.658996	331430	0	0
462039	cg12910900	chr12	13155162	-	0.965945	0.968745	-0.00279912	-0.00413189	0.000558151	0.978777	0.934666	0.00787579	0.981701	0.957878	0.00604036	0	0.658996	473088	0	0
496230	cg19531475	chr13	24472454	+	0.950086	0.955333	-0.00524645	-0.00786224	0.000558346	0.974914	0.918912	0.0116884	0.976454	0.933445	0.0104698	0	0.658996	368190	0	0
193085	cg07696277	chr4	146097432	-	0.972005	0.967961	0.00404413	0.00595362	0.000558379	0.988376	0.952139	0.00800372	0.981039	0.95171	0.00773733	0	0.658996	413022	0	0
706065	cg23422060	chr21	43916508	-	0.10216	0.0973093	0.00485074	0.0637837	0.000559705	0.126633	0.0657921	0.0115201	0.123791	0.0612541	0.0144288	0	0.658996	201914	0	0
603326	cg25937114	chr17	12899453	+	0.968204	0.971799	-0.00359536	-0.00529287	0.000560851	0.982105	0.954012	0.00618853	0.984835	0.948231	0.00676532	0	0.658996	432511	0	0
3946	cg04344205	chr1	3566818	+	0.0105515	0.0119311	-0.00137955	-0.0937308	0.000561666	0.0307773	0.00224403	0.00499541	0.0234565	0.00396495	0.0047748	0	0.658996	463694	0	0
134188	cg16236725	chr3	38104256	+	0.943759	0.945686	-0.00192637	-0.00291096	0.000562347	0.972097	0.892161	0.0124156	0.969445	0.918172	0.0132928	0	0.658996	528343	0	0
359354	cg12071743	chr9	34158637	-	0.929233	0.913017	0.0162166	0.0251268	0.000562931	0.97482	0.826683	0.0236597	0.955585	0.832865	0.0324078	0	0.658996	203759	0	0
115879	cg22860137	chr2	216878466	+	0.00866975	0.010864	-0.00219424	-0.160312	0.000564425	0.0169289	0.003312	0.00296365	0.0233043	0.00419324	0.00387224	0	0.658996	367451	0	0
101917	cg16205431	chr2	135068515	+	0.974377	0.97735	-0.00297226	-0.00434955	0.0005652	0.989217	0.953067	0.00686992	0.986451	0.964983	0.0057822	0	0.658996	464748	0	0
520027	cg20831876	chr14	53421552	-	0.966797	0.970677	-0.00387964	-0.00571874	0.000566125	0.982126	0.947033	0.00750833	0.984781	0.949678	0.00831354	0	0.658996	419601	0	0
359863	cg13596208	chr9	35603605	+	0.0230154	0.024913	-0.00189754	-0.0806225	0.000566525	0.0720352	0.0070924	0.0115335	0.0466791	0.00772902	0.00946805	0	0.658996	398288	0	0
505323	cg26894033	chr13	79964800	+	0.939737	0.923017	0.0167204	0.0256253	0.000566604	0.99206	0.825121	0.0351971	0.976096	0.804031	0.0398726	0	0.658996	201265	0	0
397744	cg10527005	chr10	87552583	-	0.831143	0.844279	-0.013136	-0.0223563	0.000567628	0.870594	0.779377	0.0215722	0.876705	0.801616	0.0211169	0	0.658996	218759	0	0
306902	cg17047021	chr7	99063273	-	0.0627797	0.0556492	0.00713048	0.148758	0.000567722	0.134029	0.0332353	0.0194817	0.0870858	0.0315771	0.0130592	0	0.658996	132798	0	0
416624	cg01705897	chr11	1986915	+	0.892468	0.866325	0.0261436	0.0424108	0.000568387	0.947831	0.790059	0.0342099	0.924793	0.7817	0.0378871	0	0.658996	137573	0	0
409378	cg10045321	chr10	126331212	+	0.93323	0.938853	-0.00562287	-0.0085748	0.000568396	0.96439	0.881278	0.0141361	0.962936	0.910189	0.0130375	0	0.658996	354611	0	0
450974	cg00891599	chr11	119067892	-	0.011283	0.015134	-0.00385096	-0.239936	0.000571773	0.0617546	0.000300197	0.00888107	0.0532531	0.0015661	0.0101223	0	0.658996	247658	0	0
25474	cg08947153	chr1	46664340	+	0.0203935	0.0185654	0.00182804	0.0894912	0.000573029	0.0322098	0.0101425	0.00460341	0.0274855	0.00991378	0.00395093	0	0.658996	406271	0	0
246842	cg05121987	chr6	27219299	-	0.0264429	0.0335973	-0.00715434	-0.258599	0.000573749	0.083375	0.00221025	0.0137793	0.0860796	0.00677837	0.018322	0	0.658996	132216	0	0
447621	cg26059977	chr11	110916892	+	0.961746	0.927801	0.0339451	0.0512976	0.000574216	0.990644	0.793426	0.0378097	0.990476	0.66732	0.0758437	0	0.658996	113372	0	0
373254	cg07309060	chr9	132406044	+	0.949126	0.942476	0.00665003	0.0100377	0.000574435	0.971771	0.901631	0.0121357	0.962764	0.880835	0.016041	0	0.658996	330199	0	0
114032	cg18482666	chr2	206520809	-	0.955167	0.949005	0.0061621	0.00924041	0.000575316	0.974998	0.915475	0.0114854	0.967817	0.928944	0.0101096	0	0.658996	342904	0	0
482632	cg04943586	chr12	106993938	+	0.707366	0.674378	0.0329879	0.0679158	0.000577016	0.809662	0.598182	0.0470184	0.762719	0.523914	0.0622875	0	0.658996	79494	0	0
257903	cg00862770	chr6	35655764	+	0.010867	0.0125188	-0.00165179	-0.109906	0.000577307	0.0204176	0.00427958	0.00401271	0.0201834	0.00406297	0.00362468	0	0.658996	427471	0	0
151987	cg05607801	chr3	125903092	+	0.92002	0.92646	-0.00644032	-0.00995613	0.000579924	0.954601	0.880751	0.0146834	0.953658	0.888674	0.0142578	0	0.658996	331427	0	0
699165	cg21688209	chr20	61940917	-	0.373589	0.324871	0.0487176	0.195954	0.000580939	0.59478	0.134942	0.0955948	0.583026	0.130076	0.101272	0	0.658996	5446	0	0
712325	cg08025954	chr22	24823455	+	0.030768	0.0290735	0.00169449	0.0612462	0.000581597	0.0448102	0.0185612	0.00564271	0.041468	0.0177006	0.00470987	0	0.658996	422242	0	0
453184	cg18248499	chr11	124768241	-	0.271752	0.26747	0.00428206	0.0220944	0.000581985	0.514016	0.148876	0.0642031	0.449733	0.183194	0.0566878	0	0.658996	226262	0	0
172026	cg04387739	chr4	3255689	-	0.969936	0.971739	-0.00180244	-0.00265118	0.000582416	0.98278	0.951318	0.00584252	0.984121	0.955411	0.00693006	0	0.658996	542199	0	0
345435	cg14803703	chr8	106729127	-	0.435072	0.390437	0.0446348	0.152463	0.000583614	0.717819	0.222285	0.0837235	0.605208	0.160168	0.098911	0	0.658996	12931	0	0
94652	cg24729503	chr2	100645977	+	0.825499	0.839326	-0.0138271	-0.0236804	0.000586023	0.877958	0.775687	0.0204663	0.8822	0.803371	0.0169243	0	0.658996	211313	0	0
65430	cg26163852	chr1	229569969	-	0.077274	0.0937405	-0.0164665	-0.249356	0.000586035	0.196019	0.00973965	0.0313018	0.211231	0.0305719	0.0411605	0	0.658996	32529	0	0
145412	cg04014805	chr3	73834503	+	0.970616	0.965236	0.0053802	0.00793722	0.000586678	0.992715	0.918974	0.0141747	0.989394	0.920463	0.0147169	0	0.658996	366702	0	0
454935	cg01267844	chr11	130010333	+	0.923932	0.929831	-0.00589982	-0.0090851	0.000586751	0.952085	0.884495	0.01265	0.953477	0.905225	0.0126372	0	0.658996	345545	0	0
368366	cg17066494	chr9	116327218	-	0.263357	0.238238	0.0251186	0.13906	0.000588017	0.573997	0.0777935	0.0920309	0.476571	0.0857592	0.0886276	0	0.658996	17271	0	0
451039	cg09315989	chr11	119204144	+	0.949783	0.955526	-0.0057435	-0.0086076	0.000588736	0.970453	0.922874	0.00936294	0.968486	0.939555	0.00738915	0	0.658996	353951	0	0
411683	cg19256291	chr10	133156155	-	0.705356	0.751261	-0.0459047	-0.0897292	0.000590269	0.927549	0.417043	0.119414	0.907783	0.532578	0.111574	0	0.658996	49574	0	0
268639	cg20201669	chr6	101844626	-	0.0632916	0.0873138	-0.0240222	-0.408996	0.000590469	0.336712	0.00616814	0.047145	0.326313	0.0197994	0.0709033	0	0.658996	12622	0	0
447467	cg08381826	chr11	110043586	-	0.952153	0.943967	0.0081861	0.0123271	0.000590749	0.980342	0.902326	0.0154138	0.970059	0.895225	0.0184495	0	0.658996	299580	0	0
105525	cg15316475	chr2	161523447	-	0.599108	0.566991	0.0321174	0.0781502	0.000591988	0.723393	0.378037	0.0630352	0.664788	0.377365	0.0639721	0	0.658996	63810	0	0
201329	cg11265041	chr5	1036462	+	0.956018	0.960812	-0.00479394	-0.00714179	0.00059212	0.974626	0.925089	0.0096688	0.975843	0.941863	0.00893201	0	0.658996	383589	0	0
586629	cg07051796	chr16	72982538	-	0.964709	0.967955	-0.00324591	-0.00479638	0.000592355	0.985062	0.944016	0.00749137	0.984845	0.9524	0.00785613	0	0.658996	448694	0	0
606911	cg11881146	chr17	26880729	+	0.922067	0.907892	0.0141757	0.0221103	0.000592369	0.96652	0.832311	0.0262297	0.958877	0.836064	0.0264031	0	0.658996	220238	0	0
544467	cg23987491	chr15	43822292	-	0.892936	0.90126	-0.00832378	-0.0132387	0.000593674	0.933749	0.856739	0.0155599	0.92973	0.869231	0.0180139	0	0.658996	289327	0	0
102058	cg06196398	chr2	135801115	-	0.561589	0.516977	0.0446118	0.117238	0.000594076	0.7879	0.29446	0.104552	0.718231	0.286608	0.116736	0	0.658996	27206	0	0
549794	cg12469421	chr15	64737547	-	0.958672	0.952067	0.00660463	0.00987032	0.000594369	0.976518	0.929953	0.00936083	0.969374	0.929781	0.0103991	0	0.658996	332757	0	0
319422	cg07027226	chr7	151393294	+	0.968885	0.973208	-0.00432306	-0.00635736	0.000596011	0.984405	0.954991	0.00690055	0.984274	0.962281	0.00649931	0	0.658996	402362	0	0
153554	cg13438640	chr3	128880060	-	0.00890321	0.0107234	-0.00182018	-0.132629	0.000596724	0.0188428	0.00335783	0.00249487	0.0173268	0.00511887	0.00313748	0	0.658996	407136	0	0
70089	cg18793688	chr1	247588074	-	0.95728	0.959401	-0.00212173	-0.00316109	0.000596785	0.972998	0.941621	0.00689039	0.97534	0.940861	0.00758688	0	0.658996	515849	0	0
93216	cg16754864	chr2	96194596	+	0.930666	0.935634	-0.00496885	-0.00760065	0.000596799	0.955875	0.890836	0.012771	0.962769	0.913995	0.0116486	0	0.658996	373694	0	0
455343	cg04307764	chr11	131524344	+	0.934732	0.941809	-0.00707644	-0.0107661	0.000598732	0.974107	0.849231	0.0172516	0.968651	0.899995	0.0133935	0	0.658996	319527	0	0
58680	cg21850691	chr1	205649807	+	0.0166155	0.0142979	0.00231765	0.131438	0.000598856	0.0273878	0.00849535	0.00366037	0.0190518	0.00845365	0.0026792	0	0.658996	355562	0	0
91158	cg16995838	chr2	77212481	+	0.0848815	0.0546623	0.0302192	0.553202	0.000600557	0.313231	0.0150662	0.0563617	0.201077	0.0126459	0.0347272	0	0.658996	6270	0	0
323754	cg24614671	chr8	1045563	-	0.913209	0.925119	-0.0119095	-0.018492	0.000600854	0.962737	0.819465	0.0252446	0.963814	0.841249	0.0258436	0	0.658996	243346	0	0
571311	cg12715278	chr16	12181777	-	0.9729	0.977154	-0.00425367	-0.00623004	0.000602149	0.98572	0.957482	0.00616101	0.988187	0.962946	0.00576018	0	0.658996	405680	0	0
522623	cg14370910	chr14	62593650	+	0.0763346	0.0636012	0.0127334	0.23021	0.000603323	0.210175	0.0217813	0.0415658	0.122979	0.0228604	0.0290703	0	0.658996	55105	0	0
149034	cg10305627	chr3	113116731	+	0.931641	0.937035	-0.00539316	-0.00823932	0.000604238	0.959028	0.892292	0.0127957	0.965564	0.908104	0.0130946	0	0.658996	360870	0	0
195966	cg15498306	chr4	164534641	+	0.0282269	0.0373479	-0.00912109	-0.308715	0.000605768	0.059905	0.0123608	0.0101508	0.0723836	0.0195088	0.0130019	0	0.658996	95417	0	0
263139	cg12894525	chr6	52165602	-	0.922148	0.930998	-0.00885001	-0.0136326	0.000606433	0.955093	0.864077	0.0184442	0.975236	0.89405	0.0200431	0	0.658996	285109	0	0
438430	cg27389775	chr11	68822072	-	0.878283	0.888873	-0.0105905	-0.0170987	0.000607762	0.925697	0.818522	0.023214	0.926211	0.847398	0.0202002	0	0.658996	253777	0	0
70614	cg27366669	chr2	265069	-	0.0114987	0.0132102	-0.00171155	-0.110513	0.000608832	0.0205417	0.00527505	0.00319209	0.021513	0.00767082	0.00343588	0	0.658996	420134	0	0
217962	cg00081100	chr5	96031557	+	0.96092	0.966605	-0.00568548	-0.00842344	0.000610265	0.985108	0.910487	0.0117955	0.984255	0.951986	0.00797276	0	0.658996	357445	0	0
686013	cg13358693	chr20	25322514	+	0.957243	0.963202	-0.00595861	-0.00886033	0.000611366	0.979708	0.918167	0.0102698	0.982537	0.936082	0.0114328	0	0.658996	349526	0	0
398194	cg08364471	chr10	89323914	+	0.877126	0.884708	-0.00758133	-0.0122768	0.000614083	0.943738	0.747402	0.0347107	0.949748	0.800253	0.0287125	0	0.658996	300172	0	0
102053	cg01559152	chr2	135781390	-	0.863616	0.873981	-0.0103645	-0.0170153	0.000617473	0.917504	0.795908	0.0232766	0.913977	0.830088	0.0202297	0	0.658996	254376	0	0
165478	cg17641914	chr3	186525444	-	0.808322	0.827931	-0.0196091	-0.034163	0.0006176	0.906091	0.690656	0.0478926	0.903568	0.687492	0.0476362	0	0.658996	164947	0	0
144176	cg05287372	chr3	69058876	+	0.968875	0.974026	-0.00515124	-0.00757214	0.000618859	0.989149	0.934577	0.0104602	0.987331	0.946922	0.00896349	0	0.658996	374335	0	0
161046	cg06238409	chr3	168864101	-	0.00854104	0.0106854	-0.00214436	-0.157891	0.000621728	0.02158	0.00207183	0.00348441	0.0197133	0.00486926	0.00416675	0	0.658996	372409	0	0
87487	cg14629348	chr2	65455242	+	0.0210851	0.0194847	0.00160044	0.0762587	0.000622712	0.0350932	0.012633	0.004132	0.0256961	0.0115586	0.00347763	0	0.658996	433989	0	0
651255	cg17299616	chr19	3825330	-	0.781384	0.79372	-0.0123359	-0.0223148	0.000624679	0.882127	0.633675	0.046911	0.879227	0.690001	0.0426923	0	0.658996	218984	0	0
397562	cg09035552	chr10	86001241	+	0.956788	0.962438	-0.00565055	-0.00840751	0.00062601	0.984208	0.905567	0.0121917	0.985603	0.93256	0.0105061	0	0.658996	357745	0	0
552979	cg06733347	chr15	72453427	+	0.88278	0.893363	-0.0105826	-0.0170005	0.000626645	0.93087	0.8091	0.0213882	0.930887	0.840729	0.0223824	0	0.658996	254495	0	0
414916	cg00478709	chr11	660755	-	0.913189	0.918512	-0.00532311	-0.0082947	0.000626682	0.94518	0.868233	0.015288	0.940544	0.88727	0.0162946	0	0.658996	359798	0	0
285491	cg03870746	chr7	1068244	+	0.0193075	0.0228145	-0.00350697	-0.163062	0.000627314	0.0359751	0.00741189	0.00619917	0.0474067	0.0117953	0.00878252	0	0.658996	267076	0	0
318491	cg20795023	chr7	150413564	+	0.0214553	0.0185437	0.00291161	0.140131	0.000627728	0.0357937	0.0109583	0.00489266	0.0265789	0.00919892	0.00483879	0	0.658996	306526	0	0
292342	cg05067136	chr7	23338802	+	0.00865908	0.0116804	-0.00302137	-0.216517	0.000627823	0.024317	0.00145905	0.00469371	0.0254062	0.0039291	0.005247	0	0.658996	298733	0	0
179326	cg21151541	chr4	40633269	-	0.948907	0.957232	-0.0083247	-0.0124706	0.000631009	0.979539	0.890702	0.0168152	0.976255	0.932383	0.0110853	0	0.658996	297939	0	0
180598	cg02677510	chr4	48832156	+	0.956317	0.961293	-0.00497631	-0.00741048	0.000632128	0.97554	0.936467	0.00863712	0.980182	0.947831	0.00810489	0	0.658996	377698	0	0
353973	cg14425468	chr8	144437541	+	0.0265405	0.0335932	-0.00705274	-0.254608	0.000632911	0.103702	0.00151612	0.0146198	0.0969367	0.00843118	0.0170526	0	0.658996	134587	0	0
451553	cg11660146	chr11	120110688	-	0.075061	0.0629537	0.0121073	0.221517	0.000634915	0.17658	0.0315638	0.0276201	0.116961	0.037088	0.019042	0	0.658996	60353	0	0
274057	cg04415236	chr6	134158299	+	0.947021	0.952039	-0.00501772	-0.00754438	0.000634932	0.96768	0.926252	0.00866341	0.973058	0.929172	0.00879435	0	0.658996	374916	0	0
510045	cg27461824	chr13	111596806	+	0.802666	0.784182	0.0184844	0.0331935	0.000636921	0.887035	0.652791	0.0420003	0.840592	0.662492	0.040975	0	0.658996	168689	0	0
462068	cg05068570	chr12	13215640	+	0.912875	0.921795	-0.00892008	-0.0138775	0.000638228	0.956628	0.846353	0.0214249	0.949918	0.890166	0.0173482	0	0.658996	282634	0	0
461806	cg26634104	chr12	12764762	-	0.0340223	0.0314011	0.0026212	0.0885654	0.000639829	0.0470533	0.0190072	0.00619421	0.0431582	0.0172264	0.00530285	0	0.658996	329053	0	0
53924	cg13893488	chr1	184228072	+	0.966305	0.969247	-0.00294266	-0.00434185	0.000639986	0.982643	0.951896	0.00686406	0.984697	0.952704	0.00701924	0	0.658996	465041	0	0
233684	cg04780741	chr5	169073733	-	0.97427	0.978144	-0.00387368	-0.00566671	0.000640816	0.989158	0.931262	0.00927481	0.987859	0.958691	0.00702045	0	0.658996	421181	0	0
147750	cg18855370	chr3	105588536	-	0.0130251	0.0150681	-0.00204301	-0.122646	0.0006415	0.029272	0.00496203	0.00462765	0.0228074	0.0059662	0.00422715	0	0.658996	382736	0	0
38567	cg15139482	chr1	111506560	+	0.0765346	0.0735698	0.0029648	0.0502954	0.000641952	0.107898	0.0436852	0.0126999	0.10576	0.0410031	0.0136947	0	0.658996	302652	0	0
237994	cg00680023	chr5	179023554	-	0.981764	0.978255	0.00350887	0.00511331	0.000643608	0.992031	0.966333	0.00529174	0.988934	0.964836	0.00576093	0	0.658996	438165	0	0
516953	cg26393294	chr14	33408404	+	0.0377426	0.0425196	-0.004777	-0.137579	0.000643941	0.0743474	0.0164872	0.0106006	0.0713764	0.0223606	0.0121109	0	0.658996	204908	0	0
323908	cg18304839	chr8	1246922	-	0.925708	0.931576	-0.00586836	-0.00901971	0.00064471	0.96257	0.88839	0.0147525	0.972024	0.88872	0.0172453	0	0.658996	346689	0	0
44382	cg14859874	chr1	154238265	+	0.353063	0.483597	-0.130533	-0.443111	0.000644758	0.960389	0.00125779	0.297186	0.957893	0.00622044	0.291624	0	0.658996	683	0	0
502834	cg10454248	chr13	51796265	+	0.0298282	0.0335022	-0.00367404	-0.127299	0.000645035	0.0569688	0.0128679	0.00763583	0.0586673	0.0164729	0.00994251	0	0.658996	257356	0	0
572328	cg16902600	chr16	17027900	-	0.945455	0.949712	-0.00425747	-0.00641432	0.000647512	0.970796	0.910701	0.0131288	0.970234	0.925832	0.0117787	0	0.658996	400896	0	0
114076	cg10652367	chr2	206584053	-	0.890398	0.899432	-0.00903425	-0.0144033	0.000648448	0.9474	0.817383	0.0300193	0.958342	0.807135	0.0298899	0	0.658996	277320	0	0
618807	cg06329491	chr17	49031751	+	0.180092	0.164574	0.0155181	0.12286	0.000648662	0.352863	0.094647	0.0434943	0.251249	0.109376	0.0367724	0	0.658996	37037	0	0
55834	cg13044330	chr1	200590474	-	0.0188565	0.0228456	-0.00398913	-0.186805	0.000648689	0.0824872	0.0018925	0.011945	0.0544281	0.00437711	0.0115661	0	0.658996	240566	0	0
202204	cg07719674	chr5	1706317	+	0.970186	0.973418	-0.00323185	-0.004749	0.000649475	0.986884	0.938989	0.00868703	0.989281	0.959077	0.00880487	0	0.658996	450376	0	0
597744	cg23928114	chr17	2637525	-	0.944757	0.949427	-0.00466984	-0.00703921	0.000649966	0.969795	0.914857	0.00919319	0.965001	0.92997	0.00897463	0	0.658996	385901	0	0
596868	cg04520396	chr17	1585312	-	0.948928	0.953639	-0.00471065	-0.00706976	0.000651036	0.967362	0.930174	0.00755716	0.971192	0.939131	0.00709912	0	0.658996	385189	0	0
207904	cg21408817	chr5	36679892	+	0.947964	0.955999	-0.00803543	-0.0120509	0.000651581	0.976066	0.886582	0.017091	0.97528	0.919776	0.0132003	0	0.658996	302887	0	0
662625	cg11689925	chr19	22815704	+	0.969869	0.971428	-0.00155991	-0.00229489	0.000651726	0.98715	0.948025	0.00851478	0.985552	0.950896	0.00870881	0	0.658996	562331	0	0
39283	cg05439713	chr1	113384082	-	0.905654	0.884448	0.0212067	0.0338061	0.000652981	0.96368	0.753352	0.0340809	0.942133	0.774371	0.0414701	0	0.658996	166242	0	0
85859	cg25862458	chr2	58654252	-	0.979229	0.97401	0.00521905	0.00763164	0.000653168	0.995461	0.955417	0.00903134	0.990786	0.941671	0.0116569	0	0.658996	373037	0	0
275389	cg16364191	chr6	138745647	-	0.874857	0.88378	-0.00892329	-0.0144759	0.00065369	0.915384	0.806347	0.0194985	0.922122	0.843945	0.0213477	0	0.658996	276615	0	0
45154	cg12872916	chr1	155168189	+	0.938718	0.945092	-0.00637485	-0.00966168	0.000653831	0.960917	0.907529	0.0112461	0.959025	0.917525	0.0089121	0	0.658996	336012	0	0
669773	cg19524534	chr19	44173100	+	0.0274455	0.0340245	-0.006579	-0.233514	0.00065425	0.0507905	0.0114003	0.00841571	0.0481666	0.0199014	0.00709978	0	0.658996	146292	0	0
691482	cg21500133	chr20	43439451	+	0.0252298	0.0285228	-0.00329302	-0.128917	0.000656551	0.057461	0.0104797	0.0085417	0.0435699	0.0143354	0.00739378	0	0.658996	280417	0	0
367135	cg02181552	chr9	110681567	+	0.912779	0.920271	-0.00749266	-0.0116669	0.000656739	0.960581	0.828643	0.0278093	0.960192	0.841429	0.0238836	0	0.658996	307632	0	0
141884	cg05840900	chr3	56972832	-	0.927937	0.937435	-0.00949838	-0.0145365	0.000657447	0.962728	0.869033	0.0170566	0.965637	0.900005	0.0144589	0	0.658996	276013	0	0
471523	cg08106887	chr12	54412565	+	0.279605	0.240108	0.0394963	0.211531	0.000658277	0.556927	0.119315	0.084891	0.373359	0.106598	0.0655152	0	0.658996	4061	0	0
71346	cg11985116	chr2	1567042	+	0.883681	0.894329	-0.0106476	-0.0170872	0.000659123	0.929659	0.832617	0.0209482	0.936632	0.846594	0.0231874	0	0.658996	253847	0	0
373596	cg16991914	chr9	133280710	+	0.870119	0.883502	-0.013383	-0.0217723	0.000659138	0.917663	0.78327	0.0296237	0.923615	0.820816	0.0238959	0	0.658996	222286	0	0
23053	cg16432235	chr1	41976593	-	0.95387	0.955288	-0.00141813	-0.00212106	0.000659441	0.974099	0.931135	0.00782561	0.974578	0.939752	0.00861994	0	0.658996	572807	0	0
634631	cg01367444	chr18	3665966	+	0.306419	0.259453	0.0469661	0.231803	0.000661529	0.560691	0.130659	0.0923316	0.390608	0.106565	0.0593702	0	0.658996	2758	0	0
538031	cg14370961	chr14	105767520	-	0.0215655	0.0244839	-0.00291837	-0.127573	0.00066228	0.0414315	0.0103542	0.00627736	0.0355031	0.0136474	0.00614954	0	0.658996	306015	0	0
420035	cg01764559	chr11	8337383	+	0.816602	0.825689	-0.00908781	-0.0157747	0.000665555	0.874911	0.748391	0.0228808	0.879538	0.767953	0.0261627	0	0.658996	264754	0	0
699367	cg23582408	chr20	62130111	+	0.0318571	0.0266483	0.00520884	0.191728	0.000666073	0.0749742	0.012748	0.0140258	0.0550536	0.00568282	0.0113078	0	0.658996	188397	0	0
653666	cg19772356	chr19	7069957	+	0.0177976	0.0196696	-0.00187199	-0.0940247	0.000666136	0.0401155	0.003942	0.00682693	0.0377699	0.0104005	0.00702532	0	0.658996	401182	0	0
231900	cg07077934	chr5	157376043	+	0.0270542	0.0246698	0.00238435	0.0959554	0.000666778	0.0598889	0.0113025	0.00990459	0.0522559	0.0101321	0.0092747	0	0.658996	349328	0	0
173181	cg07087936	chr4	5842640	-	0.942563	0.947644	-0.00508146	-0.00767562	0.000667216	0.966281	0.914468	0.0111356	0.967718	0.932411	0.00998827	0	0.658996	372118	0	0
369449	cg11012194	chr9	123606428	+	0.973848	0.978488	-0.00464044	-0.00678865	0.00066933	0.989416	0.951307	0.00807342	0.989997	0.955596	0.00806212	0	0.658996	391712	0	0
223714	cg05560165	chr5	133450315	+	0.0232535	0.0277793	-0.00452577	-0.184089	0.000670695	0.04337	0.00859237	0.00728421	0.04921	0.0130821	0.00776634	0	0.658996	215530	0	0
393367	cg17477052	chr10	71596731	+	0.141077	0.112856	0.0282217	0.298323	0.000670954	0.403418	0.0411953	0.080276	0.271166	0.0382144	0.0713724	0	0.658996	7884	0	0
262183	cg19302441	chr6	46047991	+	0.949423	0.954532	-0.00510954	-0.00766289	0.000671063	0.973329	0.911236	0.0112083	0.972367	0.924991	0.0108103	0	0.658996	372387	0	0
426156	cg20766837	chr11	34210531	+	0.915411	0.917639	-0.00222807	-0.00346934	0.000671783	0.968441	0.815937	0.032424	0.955781	0.816363	0.0324329	0	0.658996	501213	0	0
160766	cg03591690	chr3	166884766	+	0.953444	0.960159	-0.0067155	-0.0100211	0.000671993	0.982828	0.866869	0.0175791	0.986296	0.920033	0.0153448	0	0.658996	330448	0	0
400232	cg25968326	chr10	97051613	+	0.933651	0.924361	0.00929057	0.0142742	0.000673107	0.980105	0.807777	0.0319707	0.963478	0.747335	0.0394144	0	0.658996	278574	0	0
463319	cg24125890	chr12	21654287	+	0.0242283	0.0280318	-0.00380351	-0.152017	0.000677236	0.0447824	0.0123849	0.00604391	0.0430133	0.0186966	0.0063219	0	0.658996	250172	0	0
76391	cg05225001	chr2	20102464	+	0.0535496	0.0615859	-0.00803635	-0.171793	0.000677297	0.169828	0.0114934	0.0278142	0.175308	0.0145189	0.0290842	0	0.658996	113889	0	0
562959	cg11700258	chr15	101926559	-	0.952124	0.956325	-0.00420126	-0.00628604	0.000678468	0.971673	0.924203	0.00919845	0.970317	0.936758	0.0084337	0	0.658996	404244	0	0
69816	cg10521650	chr1	246930936	-	0.974661	0.972176	0.00248474	0.00364517	0.000679156	0.98635	0.945669	0.00684445	0.985833	0.951333	0.00841807	0	0.658996	493275	0	0
533372	cg16716659	chr14	99828141	-	0.943708	0.94789	-0.00418229	-0.00631281	0.000679175	0.970998	0.912623	0.0120651	0.976994	0.926117	0.0117661	0	0.658996	403548	0	0
590950	cg02817932	chr16	85683584	-	0.886762	0.892775	-0.00601274	-0.0096409	0.000679187	0.925863	0.845562	0.0172583	0.924508	0.847375	0.0178927	0	0.658996	336353	0	0
600681	cg21189242	chr17	7222189	+	0.948857	0.952658	-0.00380023	-0.00570651	0.000680197	0.97277	0.919883	0.00997388	0.970535	0.934762	0.00979687	0	0.658996	419982	0	0
432118	cg16688137	chr11	61575219	-	0.918978	0.926726	-0.00774873	-0.0119838	0.000681357	0.949919	0.884251	0.0145433	0.957191	0.899949	0.0154406	0	0.658996	303695	0	0
669406	cg08393170	chr19	42894542	-	0.0875973	0.0763695	0.0112277	0.176318	0.000682239	0.247255	0.0319835	0.0369616	0.148375	0.0428458	0.0233543	0	0.658996	68632	0	0
40617	cg14335783	chr1	117754318	-	0.648645	0.611752	0.0368931	0.083162	0.000684902	0.810578	0.419662	0.0628427	0.727472	0.454199	0.0665687	0	0.658996	57221	0	0
182755	cg03582286	chr4	71571171	-	0.15569	0.146038	0.0096522	0.0865908	0.000685584	0.196778	0.106432	0.0172739	0.174547	0.094377	0.0186322	0	0.658996	87558	0	0
58156	cg04588745	chr1	204898044	+	0.899803	0.864845	0.0349585	0.0565276	0.000685697	0.962998	0.748368	0.0457587	0.947288	0.728441	0.0509159	0	0.658996	101247	0	0
528929	cg23879435	chr14	81864643	+	0.918909	0.923561	-0.00465206	-0.00720711	0.000685913	0.950226	0.880314	0.0151438	0.94962	0.887916	0.0144099	0	0.658996	382152	0	0
547800	cg15562790	chr15	58509856	+	0.908185	0.921819	-0.0136343	-0.0212654	0.000686787	0.962417	0.827828	0.0269981	0.964846	0.877866	0.0197306	0	0.658996	225278	0	0
606639	cg02043314	chr17	26383044	+	0.869843	0.880117	-0.0102747	-0.01675	0.000688922	0.934017	0.764664	0.0364487	0.942317	0.751723	0.0401268	0	0.658996	256453	0	0
553306	cg12516231	chr15	73373867	+	0.0243784	0.0286575	-0.00427918	-0.169249	0.000691791	0.0484446	0.00699219	0.00809832	0.0617825	0.0169765	0.00896371	0	0.658996	226411	0	0
568622	cg26608663	chr16	4007772	-	0.864157	0.895205	-0.0310484	-0.0503529	0.000692085	0.957656	0.649393	0.0631733	0.956744	0.79616	0.0443202	0	0.658996	115699	0	0
127222	cg08226821	chr3	6712523	+	0.871024	0.886705	-0.0156813	-0.0254527	0.000694684	0.924774	0.800696	0.0261952	0.930376	0.835378	0.020311	0	0.658996	202119	0	0
237073	cg01993799	chr5	177027141	-	0.0247687	0.0290921	-0.00432344	-0.16909	0.000695415	0.0447893	0.00788801	0.00735885	0.0432613	0.0192226	0.00572033	0	0.658996	224476	0	0
141821	cg14432857	chr3	56809637	+	0.949447	0.955105	-0.00565845	-0.00848346	0.000695593	0.974246	0.92279	0.0105508	0.974151	0.928122	0.0102679	0	0.658996	356303	0	0
91504	cg17354220	chr2	83743984	+	0.384042	0.440769	-0.0567274	-0.19404	0.000696263	0.721084	0.0921459	0.13197	0.680004	0.176863	0.126237	0	0.658996	5651	0	0
575114	cg05336268	chr16	27788236	-	0.969037	0.971907	-0.00286959	-0.00422241	0.000697847	0.98188	0.952634	0.00673135	0.984213	0.957198	0.00503298	0	0.658996	469594	0	0
111520	cg04720277	chr2	192482590	-	0.0216125	0.0265791	-0.0049666	-0.210525	0.000698027	0.0403238	0.0073551	0.00761757	0.0611816	0.0121098	0.0104723	0	0.658996	197393	0	0
305167	cg01852509	chr7	92804673	+	0.931486	0.936378	-0.00489192	-0.00747677	0.00069845	0.95808	0.898768	0.0132156	0.959754	0.907985	0.0125651	0	0.658996	376305	0	0
574702	cg14255707	chr16	26328315	-	0.584451	0.536009	0.0484418	0.122633	0.000698512	0.741944	0.409039	0.0746948	0.670782	0.385111	0.0813394	0	0.658996	24346	0	0
493269	cg17034959	chr12	132321329	+	0.456322	0.430645	0.025677	0.0817096	0.000699509	0.617917	0.323652	0.0512864	0.541766	0.314473	0.049856	0	0.658996	58980	0	0
49158	cg23917513	chr1	165181544	-	0.684532	0.626162	0.0583699	0.126647	0.000699657	0.868244	0.418703	0.0874516	0.79083	0.406556	0.104415	0	0.658996	22405	0	0
675225	cg02927373	chr19	51347703	-	0.830197	0.871894	-0.0416967	-0.0698771	0.000701747	0.960321	0.455153	0.102029	0.965693	0.740423	0.0605667	0	0.658996	76309	0	0
591634	cg12046723	chr16	86589512	+	0.393114	0.331099	0.0620149	0.240997	0.00070197	0.70283	0.140868	0.0978093	0.491202	0.156422	0.101353	0	0.658996	2339	0	0
397603	cg12012771	chr10	86088106	-	0.0355543	0.0336903	0.00186398	0.0602736	0.000704034	0.0498321	0.0227944	0.00606512	0.0454808	0.0225949	0.00543916	0	0.658996	402098	0	0
33943	cg07959138	chr1	87601970	+	0.859773	0.87147	-0.0116965	-0.0192718	0.000704721	0.936244	0.735431	0.0396446	0.932511	0.753414	0.0367553	0	0.658996	238051	0	0
111140	cg15635368	chr2	191208116	-	0.0558526	0.0555925	0.000260086	0.00570923	0.000707587	0.132103	0.0272314	0.0191473	0.121061	0.0273171	0.0200429	0	0.658996	667724	0	0
14583	cg11591992	chr1	24621076	+	0.556665	0.545335	0.0113302	0.0291383	0.000708216	0.702462	0.416469	0.0545487	0.663689	0.433013	0.0507862	0	0.658996	185064	0	0
357057	cg15886873	chr9	6640383	-	0.882289	0.89003	-0.00774133	-0.0124626	0.00070833	0.93397	0.818361	0.0231623	0.931316	0.840442	0.0194851	0	0.658996	298035	0	0
429629	cg17839278	chr11	47664375	+	0.0197269	0.0227112	-0.00298426	-0.138014	0.000709446	0.031345	0.0118784	0.00369994	0.0325725	0.0155425	0.00475991	0	0.658996	301299	0	0
647380	cg00359471	chr19	583581	-	0.924944	0.931897	-0.00695295	-0.0106893	0.000711322	0.953631	0.888504	0.0147385	0.951886	0.90428	0.013057	0	0.658996	320654	0	0
393791	cg12336290	chr10	72362674	-	0.217334	0.204823	0.0125105	0.0816618	0.000714269	0.31751	0.155782	0.0283365	0.266529	0.150579	0.0256214	0	0.658996	59038	0	0
298600	cg24014583	chr7	46361670	+	0.958769	0.963132	-0.00436352	-0.00648359	0.000715019	0.977703	0.934575	0.0100325	0.981113	0.946883	0.00882765	0	0.658996	399191	0	0
333006	cg24955173	chr8	37573713	+	0.940596	0.944341	-0.00374436	-0.00567155	0.000717437	0.963242	0.908838	0.0103724	0.962706	0.919539	0.0103268	0	0.658996	421020	0	0
120396	cg14436272	chr2	232391405	+	0.860494	0.871062	-0.0105677	-0.0174086	0.00071782	0.915581	0.808301	0.0240236	0.916613	0.830743	0.0196759	0	0.658996	251342	0	0
673860	cg20497246	chr19	49844896	+	0.948626	0.952909	-0.00428294	-0.00643131	0.000718089	0.966156	0.917224	0.010412	0.972908	0.934793	0.011989	0	0.658996	400477	0	0
49781	cg21108412	chr1	167406377	-	0.937991	0.944746	-0.00675521	-0.0102439	0.00072087	0.969079	0.887207	0.0157178	0.968635	0.917322	0.0123904	0	0.658996	327036	0	0
2225	cg26999585	chr1	2235061	-	0.956755	0.960364	-0.00360889	-0.00537555	0.000720956	0.97349	0.929419	0.00904885	0.978564	0.938994	0.00952648	0	0.658996	429890	0	0
221486	cg18613688	chr5	123880816	-	0.912108	0.918912	-0.00680365	-0.0106057	0.000722019	0.940243	0.878051	0.0145116	0.946987	0.896288	0.0113479	0	0.658996	321805	0	0
473350	cg19105142	chr12	57472922	-	0.0099776	0.0116172	-0.00163957	-0.113795	0.000723416	0.0271724	0.00278054	0.00413719	0.02239	0.00476696	0.0046072	0	0.658996	428998	0	0
307701	cg25442420	chr7	100205104	+	0.95956	0.963586	-0.00402592	-0.00597812	0.000724147	0.978339	0.92609	0.00883047	0.97768	0.944587	0.00865215	0	0.658996	412367	0	0
375789	cg13698865	chr9	137553680	-	0.949951	0.954997	-0.0050462	-0.00756399	0.000724636	0.972115	0.909594	0.0107659	0.971806	0.930934	0.00965882	0	0.658996	374513	0	0
150610	cg05206499	chr3	121901446	-	0.881388	0.911673	-0.0302849	-0.0482013	0.000725549	0.963169	0.650556	0.0582665	0.962387	0.81168	0.0312009	0	0.658996	121227	0	0
685518	cg07942990	chr20	23432977	-	0.904639	0.909529	-0.00488968	-0.00769214	0.000725808	0.945943	0.848276	0.0187893	0.950985	0.854752	0.0228606	0	0.658996	371775	0	0
573091	cg08284233	chr16	20370531	-	0.530878	0.490106	0.0407714	0.113068	0.000726719	0.676326	0.390007	0.0622885	0.627173	0.269724	0.0825023	0	0.658996	29782	0	0
717107	cg12897989	chr22	37737288	-	0.886494	0.873126	0.0133677	0.0216742	0.000727242	0.934852	0.818689	0.0266541	0.929098	0.754779	0.0357245	0	0.658996	222864	0	0
742	cg13375638	chr1	1202768	-	0.956148	0.960263	-0.00411495	-0.00613157	0.00072814	0.975034	0.936904	0.00796958	0.977028	0.938536	0.00933535	0	0.658996	408287	0	0
672480	cg19920479	chr19	47978509	+	0.875485	0.888764	-0.0132795	-0.0214752	0.000728981	0.916307	0.808185	0.0207376	0.931611	0.846956	0.0201582	0	0.658996	224027	0	0
284884	cg25288762	chr7	683906	-	0.92663	0.935947	-0.00931681	-0.0142798	0.000729374	0.956277	0.874148	0.0159239	0.960286	0.913528	0.0121284	0	0.658996	278521	0	0
552776	cg22694813	chr15	71646079	-	0.94592	0.951337	-0.00541749	-0.00815311	0.000730527	0.97117	0.914824	0.0111366	0.973609	0.92808	0.0120604	0	0.658996	362519	0	0
646526	cg23345151	chr18	77292947	-	0.93412	0.939278	-0.00515808	-0.00786053	0.000731014	0.960464	0.896284	0.0121467	0.96105	0.915241	0.0112388	0	0.658996	368223	0	0
474242	cg13808399	chr12	58259082	-	0.0314174	0.0272641	0.00415333	0.152452	0.00073144	0.0567457	0.0117485	0.00737484	0.0473906	0.013469	0.00906719	0	0.658996	232414	0	0
140512	cg22753768	chr3	52443424	+	0.165314	0.131553	0.0337614	0.308603	0.000732351	0.313282	0.0579099	0.0602805	0.234164	0.0542858	0.0438243	0	0.658996	4339	0	0
692920	cg15161447	chr20	46095614	-	0.92305	0.934254	-0.0112039	-0.0172205	0.000733173	0.964246	0.866563	0.0183829	0.965649	0.902112	0.016363	0	0.658996	252810	0	0
181965	cg27176323	chr4	57889831	+	0.975359	0.970749	0.00461058	0.00676633	0.000734255	0.991207	0.953372	0.00791029	0.987224	0.953726	0.00829214	0	0.658996	392228	0	0
133194	cg11308114	chr3	32821930	+	0.975374	0.977377	-0.00200367	-0.00293061	0.000734754	0.987736	0.953834	0.00716035	0.987667	0.968282	0.00564142	0	0.658996	527322	0	0
455667	cg07214967	chr11	132950809	-	0.965386	0.95983	0.00555596	0.00824132	0.000735113	0.986316	0.939586	0.00947767	0.978881	0.894775	0.0147963	0	0.658996	360837	0	0
602323	cg25611523	chr17	8863841	+	0.964302	0.968865	-0.00456244	-0.00674005	0.00073545	0.982686	0.935612	0.00811098	0.984961	0.953888	0.00696227	0	0.658996	392904	0	0
64065	cg16705351	chr1	226737245	-	0.0658468	0.061695	0.00415184	0.0812165	0.000735674	0.0903487	0.0414795	0.00950166	0.0769757	0.0351577	0.00973033	0	0.658996	232485	0	0
402291	cg06514784	chr10	102422119	+	0.580056	0.619966	-0.0399095	-0.0944208	0.000736428	0.703255	0.371901	0.0714688	0.753328	0.537883	0.0555882	0	0.658996	44815	0	0
288587	cg08797598	chr7	4751611	+	0.952107	0.957875	-0.00576811	-0.00862356	0.000736776	0.97677	0.916837	0.011623	0.976696	0.934661	0.0106429	0	0.658996	353653	0	0
329475	cg10565216	chr8	22785257	+	0.948098	0.953397	-0.00529956	-0.00795805	0.000737055	0.968973	0.916137	0.00995993	0.971403	0.934249	0.0104734	0	0.658996	366310	0	0
492948	cg16282686	chr12	131707495	+	0.396697	0.383352	0.0133443	0.0481311	0.000739135	0.532589	0.31024	0.048633	0.526719	0.304353	0.0502041	0	0.658996	121415	0	0
697686	cg09238313	chr20	60273746	-	0.934253	0.940915	-0.00666192	-0.0101428	0.000739333	0.959219	0.894316	0.0131892	0.962767	0.902743	0.0159374	0	0.658996	328579	0	0
23127	cg14038959	chr1	42136440	+	0.854307	0.861646	-0.00733897	-0.0121984	0.0007403	0.919608	0.78186	0.0313748	0.917649	0.777642	0.0291721	0	0.658996	301113	0	0
644827	cg23634681	chr18	71741326	+	0.942321	0.94652	-0.00419915	-0.00634742	0.00074173	0.966606	0.905089	0.0113471	0.971989	0.918649	0.0112373	0	0.658996	402623	0	0
503228	cg06259025	chr13	52769875	+	0.174417	0.136736	0.0376805	0.329745	0.000742446	0.430755	0.0323782	0.0942549	0.331288	0.0263815	0.0784609	0	0.658996	2961	0	0
710387	cg24164157	chr22	19929710	-	0.0238446	0.0304026	-0.00655807	-0.255525	0.000743385	0.0495565	0.00444407	0.0104959	0.0738427	0.0129243	0.0130714	0	0.658996	146838	0	0
106469	cg12990337	chr2	168151004	-	0.0291317	0.0442793	-0.0151476	-0.472066	0.000743923	0.107408	0.00812781	0.0155427	0.130823	0.0121823	0.0287905	0	0.658996	39049	0	0
105859	cg03591467	chr2	163101493	-	0.977615	0.98079	-0.003175	-0.00463055	0.000744023	0.989973	0.962381	0.0065235	0.991094	0.967253	0.00527904	0	0.658996	454567	0	0
563296	cg01704105	chr16	225666	+	0.366969	0.332977	0.0339921	0.136334	0.000744778	0.565545	0.218311	0.0684245	0.474714	0.189364	0.0642081	0	0.658996	18305	0	0
436403	cg10315249	chr11	66235081	+	0.261101	0.243118	0.0179826	0.0990181	0.000745016	0.355082	0.154322	0.0424665	0.335101	0.172827	0.0422066	0	0.658996	40551	0	0
11061	cg18941796	chr1	17764175	-	0.0269318	0.0329556	-0.00602381	-0.217983	0.000747684	0.0474583	0.00852875	0.00834107	0.0557877	0.0149505	0.0107574	0	0.658996	161687	0	0
394459	cg10131019	chr10	73733381	-	0.921799	0.929774	-0.0079748	-0.0122948	0.000748749	0.948138	0.883624	0.0154644	0.960897	0.901263	0.0159277	0	0.658996	299947	0	0
499016	cg05815363	chr13	34388417	+	0.896921	0.852656	0.0442647	0.072191	0.000749819	0.974274	0.641529	0.0584012	0.951351	0.632239	0.0736646	0	0.658996	72681	0	0
139055	cg05424356	chr3	49941240	+	0.0183465	0.0204771	-0.00213062	-0.104556	0.00075187	0.0380191	0.00911332	0.00467223	0.0291925	0.0136085	0.00372118	0	0.658996	373878	0	0
457839	cg04665351	chr12	3000000	-	0.0568021	0.0519352	0.00486688	0.109133	0.000752735	0.0809737	0.0321754	0.00966342	0.0735305	0.0318876	0.0100993	0	0.658996	201296	0	0
281232	cg18405330	chr6	164171960	+	0.15592	0.110297	0.0456234	0.463891	0.000752956	0.326128	0.0363154	0.0687994	0.213429	0.04158	0.051187	0	0.658996	1404	0	0
625058	cg21830728	chr17	72600026	-	0.642072	0.650808	-0.00873587	-0.0191996	0.000752983	0.747952	0.52561	0.0529559	0.752163	0.527246	0.0548892	0	0.658996	238539	0	0
512960	cg01973552	chr13	115044379	-	0.980053	0.973863	0.00618977	0.00904799	0.000753443	0.989854	0.95578	0.00667345	0.985281	0.951395	0.00706265	0	0.658996	346225	0	0
488346	cg22713360	chr12	121125837	-	0.104812	0.113972	-0.00915968	-0.110737	0.000754794	0.229429	0.0455429	0.0332826	0.190112	0.0595054	0.0353005	0	0.658996	94855	0	0
138088	cg23013128	chr3	48668518	-	0.896452	0.90462	-0.00816746	-0.012941	0.000755984	0.940379	0.845315	0.0191359	0.936426	0.870221	0.0183351	0	0.658996	292626	0	0
550577	cg26623478	chr15	66314570	-	0.910711	0.916959	-0.00624778	-0.00975681	0.000758459	0.954213	0.829822	0.0252703	0.95816	0.851407	0.0233132	0	0.658996	334497	0	0
716537	cg08981574	chr22	36878869	+	0.930162	0.904956	0.025206	0.039207	0.00075934	0.976979	0.733998	0.0363503	0.959335	0.776713	0.0494905	0	0.658996	147564	0	0
358958	cg03564940	chr9	32526407	+	0.143078	0.131575	0.0115025	0.112696	0.000760645	0.207151	0.094143	0.0186191	0.163909	0.0806218	0.0185596	0	0.658996	65887	0	0
286963	cg12098228	chr7	2106321	+	0.0644919	0.053135	0.0113569	0.238643	0.000760654	0.173103	0.0248957	0.0272316	0.114558	0.0253776	0.0217609	0	0.658996	67322	0	0
9658	cg12816674	chr1	15407935	+	0.607227	0.576078	0.0311481	0.0747064	0.000762442	0.770255	0.457076	0.0697795	0.720215	0.463644	0.059701	0	0.658996	68808	0	0
134075	cg12005819	chr3	37995561	+	0.366789	0.350005	0.0167834	0.0657375	0.000762863	0.601622	0.228766	0.0655669	0.531632	0.242771	0.0609687	0	0.658996	83267	0	0
714391	cg10178553	chr22	30696644	-	0.959791	0.963757	-0.00396616	-0.00588816	0.000763315	0.976341	0.937631	0.00789381	0.978678	0.946001	0.00839323	0	0.658996	414819	0	0
431916	cg05131646	chr11	61324780	+	0.51072	0.481573	0.0291473	0.0831029	0.000764057	0.697235	0.270915	0.0872253	0.636047	0.271782	0.0955895	0	0.658996	57299	0	0
301692	cg19955544	chr7	72772768	-	0.314968	0.308133	0.00683438	0.0306648	0.000764852	0.567114	0.132134	0.0872915	0.501047	0.137273	0.0801818	0	0.658996	178848	0	0
621248	cg01141580	chr17	59477027	+	0.0211999	0.0244843	-0.00328432	-0.144395	0.000766296	0.0313744	0.0101518	0.00431956	0.0376567	0.0127101	0.0054947	0	0.658996	280956	0	0
365859	cg24958206	chr9	100818799	+	0.0348773	0.0317265	0.00315082	0.105023	0.000766596	0.0483306	0.0206569	0.00636203	0.0414996	0.0190785	0.0054257	0	0.658996	289773	0	0
319530	cg05367028	chr7	151506424	-	0.917824	0.925567	-0.00774257	-0.0119891	0.000767979	0.947715	0.882247	0.0130473	0.952054	0.895549	0.0129751	0	0.658996	303642	0	0
699453	cg04442417	chr20	62191507	+	0.827959	0.858346	-0.030387	-0.0513903	0.000768716	0.92221	0.701419	0.0468832	0.908008	0.764518	0.0327197	0	0.658996	113160	0	0
58733	cg06442372	chr1	205745707	-	0.906692	0.917284	-0.0105912	-0.0165729	0.000771204	0.961427	0.788303	0.0331853	0.975622	0.859595	0.0272512	0	0.658996	257916	0	0
214312	cg18877252	chr5	75380987	-	0.323142	0.273171	0.0499703	0.234461	0.000771289	0.670862	0.13518	0.111715	0.538266	0.12008	0.101967	0	0.658996	2627	0	0
450863	cg08061891	chr11	118981639	-	0.906001	0.91126	-0.00525893	-0.00825909	0.000771402	0.943839	0.861777	0.0133105	0.944849	0.887252	0.0141167	0	0.658996	360478	0	0
375960	cg14208057	chr9	137859623	-	0.388795	0.376503	0.0122914	0.0451655	0.000771738	0.540479	0.224621	0.0566404	0.503986	0.260003	0.059041	0	0.658996	129511	0	0
648294	cg26831409	chr19	1257077	-	0.882441	0.891869	-0.00942773	-0.0151607	0.000772313	0.938355	0.811459	0.0223792	0.939086	0.834724	0.023723	0	0.658996	270275	0	0
446927	cg20912066	chr11	107436729	-	0.0115316	0.0131546	-0.00162291	-0.104838	0.000772568	0.0365822	0.00319673	0.00556599	0.0268744	0.00686634	0.00472683	0	0.658996	431155	0	0
535269	cg11740638	chr14	102235587	+	0.972931	0.976029	-0.00309837	-0.00454048	0.000773086	0.984217	0.954306	0.00631383	0.986577	0.961718	0.00518843	0	0.658996	457746	0	0
289346	cg13043518	chr7	5631928	-	0.377582	0.359037	0.018545	0.0707361	0.000773763	0.543185	0.234762	0.0626417	0.488102	0.234769	0.0586314	0	0.658996	74950	0	0
145987	cg03472610	chr3	85792009	-	0.905381	0.926062	-0.020681	-0.0322318	0.000773883	0.967179	0.821893	0.0337159	0.955957	0.870162	0.0208067	0	0.658996	172358	0	0
501922	cg04794607	chr13	48612295	-	0.00220085	0.00288626	-0.000685406	-0.0788515	0.000774946	0.00752891	0.000184847	0.0013741	0.0128402	0.000693884	0.00211332	0	0.658996	580082	0	0
573478	cg10704069	chr16	21732791	+	0.95034	0.955479	-0.00513871	-0.00769918	0.000775026	0.974648	0.901504	0.0140739	0.973927	0.908088	0.0128108	0	0.658996	371622	0	0
280917	cg10757964	chr6	162545403	-	0.837699	0.856007	-0.0183081	-0.0308268	0.000776135	0.927448	0.716291	0.0374908	0.921464	0.788073	0.0335548	0	0.658996	178162	0	0
722255	cg04329382	chr22	46480891	-	0.964319	0.968156	-0.00383658	-0.00566974	0.000776313	0.983291	0.933558	0.00931671	0.983006	0.950428	0.00915948	0	0.658996	421081	0	0
589577	cg05138133	chr16	84075503	+	0.951689	0.957949	-0.00626001	-0.00936063	0.000777146	0.981851	0.870325	0.0177759	0.976073	0.924029	0.0120413	0	0.658996	340934	0	0
104574	cg02743713	chr2	157178647	-	0.129952	0.108304	0.0216473	0.242426	0.000778291	0.346682	0.0402159	0.0595124	0.20136	0.0394736	0.0399373	0	0.658996	16656	0	0
697411	cg20580475	chr20	59458205	-	0.811074	0.830691	-0.0196168	-0.034063	0.000779077	0.890233	0.69304	0.0359394	0.877755	0.756653	0.0284419	0	0.658996	165300	0	0
98253	cg06238593	chr2	115822160	+	0.750509	0.763716	-0.0132075	-0.0248398	0.000780439	0.854768	0.620981	0.0390563	0.833537	0.670924	0.0368032	0	0.658996	205287	0	0
7361	cg07035320	chr1	9885517	+	0.180999	0.168537	0.0124621	0.0973427	0.000781021	0.377354	0.0800313	0.0603947	0.302186	0.0865728	0.0476161	0	0.658996	57343	0	0
610633	cg10385208	chr17	36982030	-	0.852275	0.868066	-0.015791	-0.0261814	0.000781088	0.915683	0.788033	0.0301692	0.922735	0.824121	0.0242637	0	0.658996	198494	0	0
165390	cg15061231	chr3	186353575	-	0.912558	0.92406	-0.0115017	-0.0178752	0.000781164	0.955707	0.839111	0.026662	0.960472	0.855822	0.0230344	0	0.658996	247752	0	0
701942	cg25493335	chr21	31964676	+	0.923025	0.929792	-0.00676744	-0.0104264	0.0007821	0.957229	0.8681	0.0167601	0.954945	0.888545	0.0150711	0	0.658996	324342	0	0
215496	cg06506598	chr5	79783889	-	0.133768	0.126182	0.00758615	0.0782083	0.000783175	0.16437	0.0830821	0.0148652	0.157223	0.0836821	0.01707	0	0.658996	122763	0	0
462631	cg06644349	chr12	15745870	-	0.920529	0.906581	0.013948	0.0217888	0.000783358	0.975862	0.788644	0.0355666	0.969773	0.826508	0.0334437	0	0.658996	222187	0	0
163625	cg22348789	chr3	182703865	-	0.946661	0.950202	-0.00354061	-0.00532957	0.000783629	0.966858	0.926568	0.00876497	0.967355	0.934366	0.00819771	0	0.658996	431333	0	0
130013	cg07906116	chr3	14287306	+	0.957588	0.962364	-0.00477602	-0.00710363	0.00078472	0.974384	0.931134	0.00895789	0.973395	0.945113	0.00823346	0	0.658996	384445	0	0
273986	cg13854642	chr6	133595060	+	0.861684	0.868519	-0.0068347	-0.0112678	0.000784775	0.917005	0.808252	0.0225418	0.912194	0.822834	0.0218125	0	0.658996	312722	0	0
1178	cg14395520	chr1	1459028	-	0.839363	0.852383	-0.01302	-0.0219475	0.000786136	0.887217	0.794797	0.0191271	0.88233	0.817421	0.0172132	0	0.658996	221243	0	0
386939	cg13516719	chr10	30638507	-	0.752363	0.696785	0.0555782	0.109207	0.000786469	0.865938	0.542918	0.0704168	0.838722	0.469526	0.0822084	0	0.658996	32338	0	0
32311	cg23237611	chr1	76262857	+	0.955802	0.961083	-0.00528138	-0.00786772	0.000786517	0.980917	0.869798	0.0198243	0.986349	0.891017	0.0174191	0	0.658996	368076	0	0
570304	cg08001123	chr16	9943686	-	0.948262	0.953845	-0.00558306	-0.00838109	0.000788629	0.978355	0.872398	0.019105	0.983337	0.919699	0.0149004	0	0.658996	358224	0	0
598047	cg00996258	chr17	3435796	+	0.896907	0.901702	-0.0047948	-0.00760741	0.000789285	0.927355	0.862914	0.0144932	0.933603	0.874178	0.0159575	0	0.658996	373565	0	0
56123	cg02937748	chr1	201235006	+	0.89802	0.907381	-0.00936144	-0.0147976	0.000789874	0.944569	0.843975	0.0247045	0.944246	0.845976	0.0235269	0	0.658996	273552	0	0
718176	cg01099453	chr22	39101431	-	0.0108235	0.0138041	-0.00298063	-0.192999	0.000790522	0.0216425	0.00477825	0.00316558	0.0251337	0.00629772	0.00411774	0	0.658996	301582	0	0
697073	cg25443299	chr20	58027907	-	0.940826	0.946456	-0.00562997	-0.00851721	0.000790549	0.969548	0.910175	0.0116645	0.967997	0.926351	0.0105072	0	0.658996	355686	0	0
15696	cg04852280	chr1	26496234	+	0.0318	0.0367057	-0.00490569	-0.160095	0.000790761	0.055785	0.0149486	0.00748724	0.0562034	0.0228467	0.00890088	0	0.658996	199796	0	0
36214	cg05590522	chr1	98675035	+	0.942513	0.951172	-0.00865907	-0.0130559	0.000791265	0.976848	0.872819	0.017053	0.976097	0.926175	0.0124495	0	0.658996	291376	0	0
200622	cg25430111	chr5	305770	+	0.980144	0.98265	-0.00250639	-0.00364734	0.000792372	0.991275	0.966812	0.00529518	0.990791	0.972289	0.00482344	0	0.658996	493165	0	0
145660	cg04774620	chr3	78765904	+	0.959322	0.953218	0.00610356	0.00911299	0.000792769	0.983334	0.926525	0.0113434	0.976089	0.923774	0.0111436	0	0.658996	345087	0	0
113056	cg09643151	chr2	201981873	+	0.00883081	0.0109272	-0.00209638	-0.152284	0.000793224	0.0194431	0.00325444	0.00305017	0.0273846	0.00428766	0.00493661	0	0.658996	377286	0	0
389752	cg24053375	chr10	48392130	-	0.933564	0.939114	-0.00555064	-0.00846198	0.000793339	0.956992	0.908882	0.0108975	0.960039	0.916459	0.0103693	0	0.658996	356688	0	0
703117	cg26429557	chr21	35468971	-	0.979317	0.981155	-0.00183726	-0.00267674	0.000794121	0.990178	0.956475	0.00542573	0.990372	0.969935	0.00571881	0	0.658996	540743	0	0
560489	cg14219106	chr15	93278363	+	0.951299	0.956972	-0.00567378	-0.00849005	0.000795091	0.974114	0.908526	0.0125458	0.977133	0.93233	0.0114609	0	0.658996	356177	0	0
412844	cg06507307	chr10	134567532	-	0.964311	0.968395	-0.00408411	-0.00603484	0.000795398	0.980051	0.946397	0.00722407	0.980657	0.9527	0.00657953	0	0.658996	410857	0	0
570550	cg09561055	chr16	10881762	-	0.962137	0.966657	-0.00452048	-0.00669306	0.00079593	0.980513	0.940471	0.00775952	0.981122	0.953298	0.00774474	0	0.658996	394020	0	0
4768	cg15466571	chr1	5940692	-	0.871098	0.881658	-0.01056	-0.017188	0.000795951	0.908056	0.838543	0.0156769	0.916357	0.848588	0.0160646	0	0.658996	253078	0	0
274947	cg04071398	chr6	137363996	+	0.939497	0.950701	-0.0112038	-0.0169237	0.00079611	0.96967	0.842526	0.0219234	0.978695	0.92605	0.0131907	0	0.658996	255071	0	0
494524	cg27075898	chr12	133296313	-	0.965048	0.968445	-0.00339705	-0.0050176	0.000797342	0.981329	0.939085	0.00707798	0.979817	0.954232	0.0069316	0	0.658996	441302	0	0
163841	cg12326526	chr3	183209927	+	0.934952	0.937654	-0.00270271	-0.00412045	0.000797351	0.961019	0.910621	0.00995541	0.961037	0.912045	0.0107791	0	0.658996	473518	0	0
393883	cg00527653	chr10	72574724	+	0.888849	0.90339	-0.0145403	-0.023151	0.000797481	0.934438	0.83636	0.0194487	0.934744	0.866498	0.018011	0	0.658996	214289	0	0
41529	cg26313349	chr1	145589328	+	0.101827	0.0961541	0.00567243	0.0751024	0.00079775	0.133797	0.0656604	0.0127826	0.116145	0.0582727	0.0131527	0	0.658996	172510	0	0
341437	cg04007017	chr8	86376637	+	0.0943809	0.0884962	0.00588473	0.0837182	0.000797989	0.126881	0.0598447	0.0132012	0.112384	0.053723	0.0156154	0	0.658996	165866	0	0
76011	cg00389259	chr2	17968147	+	0.968675	0.963845	0.00482961	0.0071371	0.000803353	0.989624	0.937809	0.0103871	0.983546	0.935039	0.0102963	0	0.658996	383683	0	0
623638	cg16978133	chr17	67488817	-	0.932432	0.935571	-0.00313818	-0.004796	0.000807012	0.962485	0.902966	0.0116118	0.95844	0.91467	0.0108253	0	0.658996	448702	0	0
551818	cg13848961	chr15	69308549	-	0.898569	0.911444	-0.0128751	-0.0203006	0.000807599	0.955392	0.812307	0.028068	0.959722	0.826079	0.0271777	0	0.658996	231334	0	0
707127	cg04916486	chr21	45506743	+	0.93406	0.942598	-0.00853817	-0.0129892	0.0008078	0.960047	0.890494	0.0135998	0.962373	0.899691	0.0130502	0	0.658996	292095	0	0
692645	cg16131972	chr20	45282877	+	0.919393	0.926843	-0.0074505	-0.0115193	0.000807807	0.953735	0.878771	0.0156854	0.957276	0.888321	0.0142807	0	0.658996	309441	0	0
711376	cg24178014	chr22	22317315	-	0.962277	0.966608	-0.00433193	-0.00641358	0.000808242	0.98175	0.935286	0.00898322	0.980591	0.952288	0.00680404	0	0.658996	400922	0	0
216653	cg14810301	chr5	88169099	-	0.96169	0.965121	-0.00343163	-0.00508606	0.00080957	0.982185	0.935131	0.00799489	0.982717	0.944504	0.00923802	0	0.658996	439068	0	0
288248	cg22871796	chr7	4030595	-	0.85636	0.87107	-0.0147097	-0.0242894	0.000813253	0.905446	0.790197	0.0219352	0.911528	0.829845	0.0203825	0	0.658996	208122	0	0
438294	cg25560471	chr11	68682433	+	0.972275	0.975135	-0.00285993	-0.00419435	0.000814548	0.985381	0.958396	0.00548086	0.98323	0.96448	0.00524888	0	0.658996	470669	0	0
430679	cg18962394	chr11	58192060	-	0.508157	0.568816	-0.0606594	-0.159717	0.000815045	0.882708	0.15356	0.163916	0.806316	0.375478	0.104525	0	0.658996	11130	0	0
586547	cg03382246	chr16	72827884	-	0.939195	0.945319	-0.00612407	-0.00927816	0.00081608	0.966969	0.885305	0.0139764	0.969854	0.911388	0.0152864	0	0.658996	342319	0	0
358836	cg14363787	chr9	27573986	+	0.00934969	0.0117011	-0.00235139	-0.165457	0.000816288	0.0199525	0.00330667	0.00305184	0.0322662	0.00473905	0.00499777	0	0.658996	352347	0	0
354303	cg17774960	chr8	144676206	+	0.948492	0.955183	-0.00669091	-0.010036	0.00081856	0.970677	0.920649	0.0117161	0.970217	0.93468	0.0100171	0	0.658996	330227	0	0
367947	cg09767648	chr9	114828820	+	0.968288	0.971358	-0.00306928	-0.00451922	0.000819032	0.983119	0.949428	0.00690473	0.985047	0.957609	0.00653661	0	0.658996	458553	0	0
207192	cg21580394	chr5	33502217	-	0.912741	0.924764	-0.0120234	-0.018677	0.000821603	0.946087	0.812725	0.0209919	0.95439	0.872921	0.020102	0	0.658996	242044	0	0
250724	cg08384314	chr6	30711680	-	0.0165104	0.0198268	-0.00331634	-0.170048	0.000821604	0.033124	0.0055278	0.00555573	0.0358682	0.00775864	0.00611376	0	0.658996	278930	0	0
653525	cg25244238	chr19	6730713	+	0.904049	0.914567	-0.0105176	-0.0165058	0.000823693	0.942885	0.799597	0.0290329	0.951566	0.850979	0.0224886	0	0.658996	258486	0	0
237755	cg27003681	chr5	178635398	+	0.942836	0.949569	-0.006733	-0.0101586	0.000823778	0.961757	0.896561	0.0123353	0.97264	0.92849	0.00924507	0	0.658996	328323	0	0
9128	cg13698714	chr1	12676759	+	0.170513	0.14612	0.0243932	0.209449	0.000823804	0.3229	0.085488	0.0480572	0.225634	0.0757199	0.0367005	0	0.658996	12059	0	0
520232	cg08041575	chr14	54550555	+	0.946346	0.955614	-0.00926831	-0.0139144	0.00082419	0.971802	0.898108	0.0136237	0.979023	0.934675	0.0115487	0	0.658996	282252	0	0
171810	cg00918862	chr4	2936279	+	0.0304026	0.0366435	-0.00624089	-0.207228	0.000825793	0.055024	0.0107435	0.00932546	0.061273	0.0108003	0.0105352	0	0.658996	155454	0	0
342322	cg02217206	chr8	94509022	+	0.944523	0.9497	-0.00517762	-0.00780446	0.000826691	0.970172	0.910747	0.0119079	0.97007	0.926105	0.0105049	0	0.658996	369381	0	0
722329	cg24101990	chr22	46594251	-	0.959904	0.955523	0.0043801	0.00652999	0.000828595	0.981422	0.937707	0.0095869	0.972742	0.933803	0.00868317	0	0.658996	398066	0	0
599696	cg18989615	chr17	5487989	+	0.0180829	0.0166693	0.00141362	0.0745129	0.000829309	0.0265696	0.011592	0.00345021	0.0217149	0.0107356	0.00293051	0	0.658996	458910	0	0
453969	cg12689529	chr11	126335883	+	0.0607253	0.0555932	0.00513207	0.10868	0.000829558	0.160079	0.0336419	0.0215854	0.0801461	0.033307	0.0140745	0	0.658996	191143	0	0
686616	cg23574215	chr20	30555351	+	0.337581	0.323671	0.0139106	0.0589256	0.000829736	0.49673	0.192259	0.0536526	0.410414	0.217072	0.0452126	0	0.658996	96166	0	0
702293	cg19168326	chr21	33650974	+	0.0354408	0.0324774	0.00296341	0.0972931	0.000830022	0.0500087	0.0209804	0.00591533	0.0454272	0.0210202	0.00682231	0	0.658996	302762	0	0
464637	cg06568330	chr12	27863683	-	0.0198133	0.0215333	-0.00171998	-0.0809191	0.000830673	0.0303894	0.0105519	0.00424139	0.0336018	0.0126184	0.00477475	0	0.658996	419094	0	0
669749	cg18006123	chr19	44132711	-	0.965363	0.969084	-0.00372126	-0.00549377	0.000832358	0.981803	0.946982	0.00706521	0.983688	0.953819	0.00807541	0	0.658996	426348	0	0
14944	cg13236242	chr1	25248925	+	0.869685	0.885316	-0.0156304	-0.025409	0.000832872	0.934381	0.749634	0.0368609	0.942208	0.796544	0.0342662	0	0.658996	202330	0	0
486754	cg12196045	chr12	116997185	+	0.0496582	0.0442822	0.00537605	0.136242	0.000834091	0.086053	0.0224672	0.0110377	0.0680277	0.0221973	0.010378	0	0.658996	182360	0	0
702337	cg07316147	chr21	33708289	-	0.84846	0.862214	-0.0137544	-0.0229318	0.000836523	0.917568	0.756634	0.0311357	0.917715	0.807448	0.0247666	0	0.658996	215518	0	0
57921	cg00952134	chr1	204381018	-	0.0141924	0.0171204	-0.00292799	-0.164824	0.000836865	0.0321591	0.00287576	0.00617503	0.0349869	0.00495483	0.00701566	0	0.658996	305329	0	0
358882	cg17757450	chr9	29213087	+	0.0424508	0.0496345	-0.00718362	-0.18518	0.000837155	0.147439	0.0114566	0.0205155	0.0802686	0.0242765	0.0154806	0	0.658996	131551	0	0
165687	cg03591420	chr3	187346840	+	0.917581	0.923937	-0.00635612	-0.00985215	0.000837832	0.961163	0.806515	0.0231837	0.953295	0.848626	0.0250388	0	0.658996	332997	0	0
54199	cg18273350	chr1	185270682	-	0.963227	0.965447	-0.00222014	-0.00328735	0.000838009	0.981001	0.934531	0.00841827	0.98006	0.943419	0.00917392	0	0.658996	509858	0	0
116431	cg27069628	chr2	218570889	-	0.879935	0.888186	-0.00825142	-0.013315	0.000838301	0.948345	0.750971	0.0374462	0.945084	0.800688	0.0324548	0	0.658996	288531	0	0
204013	cg21933165	chr5	6944118	-	0.851644	0.863653	-0.0120091	-0.0199686	0.000838507	0.903668	0.776216	0.0303752	0.913315	0.808593	0.0270138	0	0.658996	233386	0	0
267487	cg20853696	chr6	90609487	-	0.920173	0.909732	0.0104409	0.0162854	0.000838651	0.969172	0.810171	0.0287654	0.960388	0.829919	0.0289752	0	0.658996	260402	0	0
474978	cg19115204	chr12	64782908	+	0.879024	0.859252	0.0197715	0.032447	0.000839846	0.951056	0.728281	0.0449662	0.932099	0.758288	0.0480229	0	0.658996	171520	0	0
9657	cg25835058	chr1	15407757	+	0.421242	0.367381	0.0538614	0.192477	0.000840803	0.79505	0.143939	0.149651	0.672415	0.159878	0.129597	0	0.658996	5825	0	0
325137	cg16601933	chr8	6147291	+	0.975802	0.978101	-0.00229846	-0.00335982	0.000840973	0.986197	0.956797	0.00614834	0.990497	0.967034	0.0057083	0	0.658996	506390	0	0
521546	cg09952226	chr14	59597618	-	0.90874	0.916467	-0.00772733	-0.0120835	0.000841244	0.958754	0.81797	0.0236523	0.948509	0.838656	0.0243903	0	0.658996	302487	0	0
107843	cg03758484	chr2	173421431	+	0.0128051	0.0141736	-0.00136848	-0.0840745	0.000842327	0.0241533	0.00682228	0.00294442	0.0231591	0.0096472	0.00319927	0	0.658996	465260	0	0
159485	cg01308236	chr3	156391777	-	0.0168211	0.0201142	-0.00329307	-0.167074	0.000842806	0.0288812	0.00645635	0.00573894	0.0374257	0.00967554	0.00616123	0	0.658996	280409	0	0
325417	cg04636166	chr8	6914420	-	0.796801	0.74894	0.0478608	0.0882267	0.000842991	0.939082	0.545552	0.0859322	0.900903	0.429805	0.0954972	0	0.658996	51174	0	0
355477	cg14430982	chr8	145691629	+	0.012582	0.0112382	0.00134386	0.0885159	0.000843883	0.0258282	0.000806415	0.0052032	0.0252516	0.000682003	0.00638666	0	0.658996	468857	0	0
655120	cg09388123	chr19	9783906	+	0.979675	0.975599	0.00407568	0.00595358	0.000844319	0.991981	0.960468	0.00632245	0.9893	0.960567	0.00695741	0	0.658996	413023	0	0
541646	cg26295624	chr15	36872085	+	0.0405039	0.0390868	0.0014171	0.0410596	0.00084452	0.0811682	0.0224059	0.00915205	0.0630127	0.0235723	0.0103243	0	0.658996	458396	0	0
432211	cg23659934	chr11	61650130	-	0.826622	0.834881	-0.00825902	-0.0141723	0.000845758	0.88977	0.78052	0.0226055	0.896926	0.765667	0.0252168	0	0.658996	279558	0	0
259868	cg20540723	chr6	41294143	+	0.864033	0.910894	-0.0468603	-0.0753462	0.00084676	0.971381	0.536711	0.119404	0.966943	0.647629	0.0764079	0	0.658996	67823	0	0
599063	cg17165253	chr17	4646098	-	0.976957	0.978887	-0.00192929	-0.0028174	0.000847049	0.988007	0.953772	0.00607706	0.988432	0.959303	0.00688159	0	0.658996	533289	0	0
601877	cg01878839	chr17	8126381	-	0.0373617	0.0335668	0.00379491	0.120492	0.00084761	0.056216	0.0225806	0.00711353	0.0438699	0.0205339	0.00594354	0	0.658996	250609	0	0
127295	cg17219740	chr3	7773492	-	0.927118	0.931052	-0.00393447	-0.00604444	0.000848579	0.9658	0.852346	0.017698	0.964433	0.891668	0.0186036	0	0.658996	410602	0	0
225252	cg19513246	chr5	137721255	+	0.889273	0.908225	-0.0189515	-0.0300878	0.000850087	0.947252	0.786489	0.0290611	0.947203	0.873685	0.0215445	0	0.658996	181171	0	0
576488	cg08129848	chr16	30456761	-	0.0176829	0.0210314	-0.00334853	-0.164735	0.00085044	0.0296323	0.00735961	0.00456781	0.0345627	0.0117504	0.00490457	0	0.658996	276866	0	0
65453	cg21573793	chr1	229643508	+	0.0139569	0.0181289	-0.00417199	-0.231611	0.000852017	0.0320905	0.00182588	0.00632981	0.0503713	0.00479981	0.00933232	0	0.658996	231506	0	0
202282	cg24039870	chr5	1786730	-	0.925359	0.929387	-0.00402829	-0.00619988	0.000852483	0.955187	0.896201	0.0111405	0.95588	0.898368	0.0125264	0	0.658996	406510	0	0
668499	cg02372201	chr19	41725152	+	0.114517	0.10703	0.00748632	0.0894563	0.000852891	0.178961	0.0632186	0.023833	0.159015	0.0549126	0.0218459	0	0.658996	124903	0	0
119748	cg04783764	chr2	230845423	+	0.959758	0.964181	-0.00442329	-0.0065655	0.000853748	0.979441	0.928129	0.00834979	0.980126	0.94648	0.00838984	0	0.658996	397226	0	0
504716	cg02607802	chr13	76211251	+	0.0570638	0.0681813	-0.0111175	-0.22129	0.000854858	0.104233	0.02511	0.0160219	0.108098	0.0443532	0.0175517	0	0.658996	69783	0	0
654664	cg02828054	chr19	8478160	-	0.00801126	0.00857457	-0.000563314	-0.04443	0.000855822	0.0195106	0.000921354	0.0037814	0.0190001	0.00240216	0.00379491	0	0.658996	604023	0	0
10399	cg10312679	chr1	16442379	-	0.248242	0.237384	0.010858	0.0619715	0.000856032	0.369062	0.137921	0.0414075	0.322032	0.151707	0.0431663	0	0.658996	90154	0	0
389360	cg14294926	chr10	45480677	-	0.936285	0.940254	-0.00396829	-0.00603736	0.000856487	0.956216	0.9063	0.0100805	0.958756	0.919204	0.00900794	0	0.658996	410792	0	0
131906	cg11296421	chr3	24640905	+	0.972297	0.965916	0.00638101	0.00940234	0.000858939	0.990785	0.945809	0.00963314	0.982169	0.88294	0.0166635	0	0.658996	340264	0	0
435665	cg18099927	chr11	65611957	+	0.949967	0.937434	0.0125335	0.0189602	0.000859049	0.988281	0.89718	0.0159844	0.976406	0.843657	0.0301885	0	0.658996	240125	0	0
465464	cg09970396	chr12	32113004	-	0.00932892	0.0118578	-0.00252885	-0.177385	0.000859061	0.0203642	0.00186375	0.00395189	0.026859	0.0043656	0.00543352	0	0.658996	336683	0	0
954	cg17132079	chr1	1294140	+	0.434974	0.401928	0.0330467	0.111331	0.000860276	0.651831	0.241143	0.0732332	0.540288	0.195525	0.0814183	0	0.658996	30930	0	0
244744	cg05376119	chr6	18314298	-	0.923813	0.934263	-0.01045	-0.0160551	0.000860661	0.961589	0.792504	0.0312685	0.972597	0.868813	0.0215469	0	0.658996	262306	0	0
696998	cg12058843	chr20	57844021	-	0.659727	0.602109	0.0576178	0.129784	0.000860964	0.863244	0.398605	0.128652	0.822343	0.33553	0.134923	0	0.658996	20952	0	0
451433	cg03975781	chr11	119973827	+	0.911544	0.922778	-0.0112343	-0.0174812	0.00086169	0.961503	0.842226	0.0228297	0.957091	0.874031	0.0218194	0	0.658996	250744	0	0
386837	cg11967492	chr10	30303294	-	0.957481	0.96116	-0.00367937	-0.00547623	0.000862703	0.979237	0.912411	0.0115213	0.979234	0.928828	0.0110468	0	0.658996	426867	0	0
578095	cg08050352	chr16	46864715	+	0.110755	0.106531	0.00422411	0.0513706	0.000863707	0.146281	0.0699391	0.0141655	0.133482	0.0687784	0.0150566	0	0.658996	228957	0	0
428281	cg18863223	chr11	45672756	+	0.954004	0.962754	-0.00875029	-0.0130363	0.000865206	0.984901	0.836932	0.0209114	0.983237	0.934835	0.0122131	0	0.658996	291581	0	0
710163	cg23074732	chr22	19644239	+	0.936686	0.943745	-0.00705962	-0.0107185	0.000866844	0.965583	0.887538	0.0149453	0.96837	0.919516	0.012579	0	0.658996	320239	0	0
203710	cg14672100	chr5	6344259	+	0.778107	0.80028	-0.0221727	-0.0400286	0.000867749	0.868911	0.619213	0.0526145	0.872116	0.715223	0.0382484	0	0.658996	144868	0	0
666772	cg10236898	chr19	39002928	-	0.975056	0.977022	-0.00196655	-0.0028773	0.000867784	0.986711	0.953774	0.00662901	0.989152	0.963959	0.00639493	0	0.658996	530076	0	0
536610	cg09922085	chr14	104175768	+	0.938338	0.944414	-0.0060763	-0.00921431	0.00086801	0.958885	0.900202	0.0125703	0.965368	0.921774	0.0127111	0	0.658996	343351	0	0
410751	cg20400955	chr10	130828973	+	0.957901	0.950966	0.0069347	0.0103736	0.000868119	0.985188	0.91386	0.0167012	0.974846	0.916371	0.0135058	0	0.658996	325124	0	0
86913	cg02629905	chr2	63820866	-	0.961971	0.95393	0.0080412	0.0119852	0.000868337	0.980434	0.930652	0.00943488	0.974609	0.931998	0.0129995	0	0.658996	303682	0	0
292700	cg01429899	chr7	24830817	-	0.852293	0.864154	-0.0118604	-0.0197082	0.000868807	0.907656	0.768308	0.0262988	0.921052	0.831953	0.0243	0	0.658996	235091	0	0
715681	cg00220221	chr22	33178792	+	0.928433	0.933552	-0.00511929	-0.00784872	0.000870903	0.956762	0.890198	0.0144551	0.955199	0.901691	0.0143109	0	0.658996	368445	0	0
176426	cg27060294	chr4	16839404	-	0.931371	0.937709	-0.00633857	-0.0096816	0.000871048	0.961019	0.890075	0.0114777	0.959493	0.907614	0.0110891	0	0.658996	335690	0	0
460069	cg26363363	chr12	7060386	-	0.0261351	0.0309385	-0.00480331	-0.180054	0.00087203	0.0402392	0.0129965	0.00590811	0.0430482	0.0185115	0.00643316	0	0.658996	203855	0	0
122527	cg24265138	chr2	237413481	+	0.885727	0.892864	-0.00713663	-0.011449	0.000872806	0.930207	0.837523	0.0213577	0.933442	0.843959	0.0215504	0	0.658996	310342	0	0
265125	cg23683853	chr6	73886830	+	0.90079	0.87795	0.0228401	0.0366402	0.000872993	0.961128	0.76707	0.0394612	0.944442	0.718844	0.0526876	0	0.658996	156102	0	0
181254	cg22878148	chr4	55104084	+	0.903117	0.91281	-0.00969256	-0.0152332	0.000873151	0.950681	0.795034	0.0297459	0.965538	0.823837	0.0272556	0	0.658996	269586	0	0
599507	cg23619370	chr17	5168138	-	0.621456	0.604006	0.0174499	0.0404292	0.000873541	0.746549	0.500319	0.0519595	0.663946	0.471375	0.0481527	0	0.658996	143566	0	0
567012	cg02847766	chr16	2470641	+	0.0916964	0.0822482	0.00944829	0.140677	0.000875985	0.200737	0.0258814	0.0360171	0.198843	0.0289612	0.0351131	0	0.658996	90525	0	0
692513	cg01758993	chr20	44993436	-	0.0271473	0.0311205	-0.00397319	-0.1466	0.000876121	0.062387	0.0100876	0.00989414	0.0609263	0.0135534	0.0112331	0	0.658996	241341	0	0
543754	cg11130987	chr15	42226096	+	0.926417	0.931361	-0.00494343	-0.00759609	0.000876246	0.954716	0.887989	0.0148397	0.960632	0.901474	0.0146737	0	0.658996	373788	0	0
319170	cg04251489	chr7	151017776	-	0.968984	0.971677	-0.00269307	-0.00396324	0.000876816	0.982057	0.948367	0.00718974	0.985014	0.956094	0.00732792	0	0.658996	479783	0	0
679423	cg21994576	chr19	58739778	+	0.126089	0.119326	0.00676233	0.0735309	0.00087761	0.181722	0.0661584	0.0226651	0.155986	0.0709725	0.0220637	0	0.658996	141583	0	0
490366	cg09372386	chr12	124397892	+	0.973994	0.976356	-0.00236139	-0.00345803	0.000878399	0.986043	0.954272	0.00603712	0.986838	0.963035	0.00556366	0	0.658996	501764	0	0
398865	cg11960629	chr10	91295317	+	0.0757983	0.0679999	0.00779834	0.137476	0.000881415	0.137897	0.0395622	0.0177115	0.098584	0.039637	0.0130762	0	0.658996	118410	0	0
436151	cg19178040	chr11	66036932	+	0.012882	0.0149639	-0.00208183	-0.125626	0.000881523	0.0218945	0.00634801	0.00352573	0.0222313	0.0086406	0.00410541	0	0.658996	378704	0	0
81538	cg10481134	chr2	38387443	-	0.937228	0.907858	0.0293701	0.0454409	0.000881907	0.986985	0.779028	0.0423857	0.975367	0.714174	0.0596556	0	0.658996	128704	0	0
721830	cg22693272	chr22	45724948	-	0.414824	0.450924	-0.0361003	-0.117665	0.000882348	0.682064	0.218435	0.091515	0.674316	0.296268	0.0797074	0	0.658996	26967	0	0
325652	cg09957504	chr8	8742058	-	0.950894	0.960423	-0.00952937	-0.014237	0.000882486	0.979722	0.897354	0.0152291	0.986426	0.915001	0.0145209	0	0.658996	278934	0	0
272563	cg02612397	chr6	125855124	+	0.277141	0.247676	0.0294649	0.156201	0.000882728	0.492426	0.139854	0.0733408	0.469399	0.141473	0.0641253	0	0.658996	11973	0	0
129474	cg21924571	chr3	13114441	+	0.28878	0.248442	0.0403382	0.209244	0.000882776	0.542241	0.135616	0.0724371	0.359379	0.122339	0.0623408	0	0.658996	4244	0	0
597957	cg09554952	chr17	3030881	+	0.784093	0.812338	-0.028245	-0.0504235	0.0008849	0.871457	0.642303	0.0445488	0.889833	0.737284	0.030861	0	0.659902	115506	0	0
550062	cg25698089	chr15	65321903	+	0.0261804	0.0304841	-0.00430378	-0.16215	0.000888784	0.0393987	0.0145947	0.00558786	0.045022	0.0185332	0.00744409	0	0.660604	225312	0	0
234007	cg12008764	chr5	170120755	+	0.697461	0.656287	0.0411743	0.0865076	0.000888814	0.851187	0.456212	0.0907807	0.829252	0.494267	0.0841562	0	0.660604	53192	0	0
530744	cg14548192	chr14	92335675	-	0.962865	0.96643	-0.00356555	-0.00527781	0.000888976	0.978083	0.94685	0.00708407	0.977484	0.953569	0.00706153	0	0.660604	432950	0	0
496192	cg02467012	chr13	24368042	+	0.906402	0.91689	-0.0104884	-0.0164182	0.000891085	0.948476	0.836165	0.0221584	0.947934	0.879662	0.0184103	0	0.660604	259250	0	0
111551	cg22795891	chr2	192543908	-	0.395521	0.353954	0.0415673	0.156021	0.000891527	0.645521	0.182349	0.101671	0.541032	0.191893	0.0974511	0	0.660604	12027	0	0
27746	cg07598331	chr1	53926227	+	0.931189	0.936252	-0.00506339	-0.00774059	0.000892542	0.960879	0.848314	0.021454	0.959287	0.901755	0.0135396	0	0.660604	370739	0	0
558436	cg22338328	chr15	89055193	+	0.965058	0.966898	-0.00184071	-0.00272095	0.00089353	0.981816	0.939572	0.00797342	0.985018	0.953747	0.00714352	0	0.660604	538325	0	0
17776	cg10264162	chr1	30126941	+	0.759266	0.805617	-0.0463512	-0.0844097	0.000893824	0.854799	0.601045	0.0542642	0.875436	0.703695	0.0358143	0	0.660604	55698	0	0
400251	cg20502346	chr10	97088584	+	0.935951	0.919442	0.0165098	0.0254019	0.000894044	0.987945	0.810439	0.0294793	0.972856	0.850698	0.0326206	0	0.660604	202361	0	0
498410	cg01522829	chr13	31690720	+	0.900177	0.909883	-0.00970548	-0.0153024	0.000895923	0.94119	0.854973	0.0191306	0.950887	0.880532	0.0169856	0	0.661319	268980	0	0
683914	cg15815375	chr20	17594530	+	0.797459	0.809977	-0.0125177	-0.0221939	0.000897779	0.867704	0.735685	0.0255075	0.854615	0.759503	0.0238003	0	0.661952	219744	0	0
562256	cg03300787	chr15	100533202	+	0.759219	0.782358	-0.0231394	-0.0427588	0.000898608	0.845629	0.623768	0.0441766	0.865147	0.728117	0.0316214	0	0.661952	136535	0	0
247530	cg07242282	chr6	28412251	-	0.905672	0.921761	-0.0160896	-0.0251299	0.000902823	0.957766	0.793764	0.0314744	0.962346	0.814549	0.0273928	0	0.66336	203741	0	0
691502	cg15324310	chr20	43514360	-	0.0129354	0.015388	-0.0024526	-0.14657	0.000905186	0.0269317	0.00300582	0.00516492	0.0271584	0.00701403	0.00439607	0	0.66336	343234	0	0
635453	cg21191574	chr18	8859393	-	0.855788	0.879441	-0.0236528	-0.0388848	0.000905919	0.932415	0.655325	0.0510262	0.948068	0.744615	0.037054	0	0.66336	148598	0	0
376769	cg26979259	chr9	139228817	-	0.921139	0.928801	-0.00766262	-0.0118238	0.000907749	0.962599	0.86977	0.0187764	0.957424	0.888458	0.0137607	0	0.66336	305660	0	0
349107	cg17032846	chr8	128095382	+	0.929894	0.935946	-0.00605216	-0.00926001	0.000908241	0.962235	0.87257	0.0149788	0.964149	0.910102	0.0121069	0	0.66336	342606	0	0
678789	cg17868363	chr19	57752307	-	0.0158245	0.0210857	-0.00526113	-0.267507	0.000909083	0.0343994	0.00280411	0.00705623	0.0480539	0.00626651	0.00922872	0	0.66336	186418	0	0
386853	cg12731836	chr10	30318683	-	0.943918	0.948516	-0.00459812	-0.00693744	0.000909395	0.967369	0.909249	0.0109353	0.970681	0.92085	0.0108978	0	0.66336	388222	0	0
283672	cg19269926	chr6	169902154	-	0.928389	0.931955	-0.00356608	-0.00547216	0.000909758	0.949858	0.897375	0.0113323	0.951282	0.912327	0.0106983	0	0.66336	426988	0	0
162276	cg07452098	chr3	173457176	+	0.943148	0.947775	-0.00462675	-0.00698615	0.000910584	0.973956	0.884004	0.0171564	0.988682	0.91514	0.016413	0	0.66336	387134	0	0
289024	cg07508942	chr7	5267994	+	0.968238	0.96979	-0.00155133	-0.00228607	0.000912574	0.980583	0.956964	0.00588077	0.980985	0.952615	0.00607278	0	0.66336	562806	0	0
221796	cg05593759	chr5	125695848	+	0.930508	0.937474	-0.00696662	-0.0106471	0.000913267	0.96943	0.854851	0.0196142	0.967327	0.900782	0.0179802	0	0.66336	321251	0	0
691996	cg14780681	chr20	44420720	-	0.0184137	0.0211994	-0.00278563	-0.134928	0.000914187	0.0326851	0.00832545	0.00517269	0.0375006	0.00836916	0.00716162	0	0.66336	315955	0	0
115641	cg05691168	chr2	216176809	+	0.0253494	0.0226188	0.00273061	0.115983	0.000914325	0.0438729	0.0148236	0.00545881	0.0391879	0.00994049	0.0062147	0	0.66336	320247	0	0
242596	cg13351621	chr6	10952381	+	0.866262	0.882085	-0.015823	-0.0258189	0.000914401	0.940785	0.74861	0.0342422	0.946993	0.795865	0.0306039	0	0.66336	200299	0	0
661438	cg17969123	chr19	18745971	+	0.37892	0.358378	0.0205418	0.0782856	0.000915148	0.519392	0.272755	0.0405338	0.420793	0.272561	0.0314835	0	0.66336	63618	0	0
443048	cg07909967	chr11	78142047	+	0.957192	0.961963	-0.0047709	-0.00709894	0.000915161	0.977275	0.917542	0.0104856	0.979723	0.934772	0.00866356	0	0.66336	384558	0	0
686930	cg16326403	chr20	31123990	-	0.069181	0.0647855	0.00439544	0.0823945	0.00091662	0.114249	0.0461097	0.0116159	0.0898258	0.0424947	0.0112717	0	0.663754	221216	0	0
120240	cg14900199	chr2	232087084	+	0.963489	0.966715	-0.00322607	-0.00477308	0.000917623	0.980411	0.939422	0.00821269	0.982882	0.943009	0.00881574	0	0.663817	449512	0	0
345725	cg24633260	chr8	109245294	-	0.935647	0.942678	-0.00703087	-0.0106867	0.00091895	0.974608	0.876063	0.0189068	0.973699	0.914246	0.0163258	0	0.66401	320699	0	0
364575	cg06090314	chr9	96291645	+	0.931107	0.936422	-0.00531466	-0.00812434	0.000919722	0.961481	0.899253	0.0127351	0.965788	0.919145	0.0124397	0	0.66401	363011	0	0
642559	cg20477402	chr18	55328421	-	0.896467	0.906943	-0.0104763	-0.016578	0.000921598	0.944427	0.836948	0.0219149	0.945363	0.845351	0.0214212	0	0.664702	257862	0	0
459374	cg22140363	chr12	6561547	+	0.00985573	0.0129295	-0.0030738	-0.207651	0.000924297	0.030767	0.00258257	0.00450469	0.0357275	0.00529667	0.00746733	0	0.665528	295068	0	0
681403	cg17156227	chr20	3209945	-	0.827612	0.833801	-0.00618914	-0.0106209	0.00092458	0.882321	0.767385	0.0226146	0.867293	0.771405	0.0241151	0	0.665528	321608	0	0
181363	cg01575886	chr4	55809673	-	0.747879	0.730815	0.0170644	0.032855	0.000925965	0.868277	0.610204	0.056872	0.823475	0.598031	0.053533	0	0.66558	169935	0	0
705391	cg01208266	chr21	42953366	+	0.908103	0.919024	-0.0109211	-0.01706	0.00092738	0.956765	0.776088	0.0341184	0.963037	0.816373	0.032494	0	0.66558	254029	0	0
224149	cg22827250	chr5	134363823	-	0.241201	0.192316	0.0488855	0.312235	0.000928562	0.466369	0.101139	0.0830101	0.39935	0.0890175	0.0727642	0	0.66558	1010	0	0
422279	cg06297470	chr11	14666839	+	0.0116265	0.0140174	-0.00239086	-0.151277	0.000929868	0.0324007	0.00193998	0.00596222	0.0338913	0.00547978	0.00683112	0	0.66558	348723	0	0
328141	cg12622242	chr8	19203257	+	0.510221	0.436204	0.0740171	0.221422	0.000930105	0.835187	0.319835	0.124825	0.737255	0.263352	0.0842099	0	0.66558	3343	0	0
237055	cg07160800	chr5	177018950	+	0.0105349	0.0132836	-0.00274868	-0.181235	0.000930227	0.0316322	0.00342334	0.00395896	0.032825	0.00464499	0.00551732	0	0.66558	318773	0	0
721799	cg17795059	chr22	45704902	+	0.0523121	0.0430446	0.00926746	0.232305	0.000931964	0.137575	0.0167964	0.0230136	0.0898416	0.01699	0.0171428	0	0.66558	93253	0	0
350435	cg21666956	chr8	134012885	+	0.988972	0.985633	0.00333856	0.00482955	0.000932978	0.995161	0.976763	0.00351561	0.993961	0.972717	0.00539677	0	0.66558	447546	0	0
32395	cg13434669	chr1	77013304	-	0.938964	0.943575	-0.00461119	-0.00699334	0.000933449	0.965036	0.893281	0.0137099	0.965027	0.91864	0.0120902	0	0.66558	386986	0	0
707727	cg05029838	chr21	46237743	-	0.0159194	0.0185895	-0.0026701	-0.141453	0.00093403	0.0289494	0.0053418	0.00504146	0.029501	0.00838341	0.00511666	0	0.66558	325096	0	0
108098	cg16805923	chr2	174523036	-	0.956718	0.960909	-0.00419104	-0.00624103	0.000935321	0.978172	0.930931	0.0110819	0.976582	0.941564	0.00939841	0	0.66558	405395	0	0
461777	cg23224405	chr12	12715060	+	0.0171474	0.0186193	-0.00147199	-0.0761788	0.000935925	0.0291791	0.0066795	0.00498013	0.0279485	0.00777709	0.00493878	0	0.66558	451014	0	0
190930	cg10731073	chr4	126237373	+	0.0176841	0.0202449	-0.00256086	-0.127637	0.000936937	0.0421627	0.00778248	0.00619641	0.038184	0.0105403	0.00587832	0	0.66558	334041	0	0
629181	cg02310027	chr17	77704741	-	0.908569	0.914335	-0.00576578	-0.00902737	0.000937507	0.943726	0.861194	0.0149682	0.946586	0.893057	0.0130285	0	0.66558	346565	0	0
2222	cg00618291	chr1	2234291	-	0.922811	0.929405	-0.00659409	-0.0101626	0.000939264	0.95289	0.88655	0.0137543	0.962282	0.900842	0.0127275	0	0.665666	328264	0	0
681030	cg05857996	chr20	2675418	+	0.734082	0.64572	0.0883623	0.182382	0.000940273	0.9424	0.33519	0.139845	0.863705	0.393794	0.12213	0	0.665666	7127	0	0
209485	cg03389318	chr5	43874923	-	0.894186	0.846865	0.0473215	0.0775526	0.000940383	0.966106	0.751578	0.0451124	0.943384	0.6868	0.0701663	0	0.665666	64598	0	0
573041	cg03448169	chr16	20186968	+	0.143434	0.101677	0.0417575	0.458292	0.000943461	0.414438	0.0340545	0.0822416	0.214309	0.0422608	0.0439448	0	0.666945	1984	0	0
122214	cg19761110	chr2	236774071	+	0.417354	0.468903	-0.0515495	-0.164303	0.000946186	0.720947	0.197149	0.113919	0.770651	0.294923	0.14549	0	0.666945	10166	0	0
388525	cg27137512	chr10	43048665	-	0.0989075	0.0835553	0.0153522	0.219213	0.000946553	0.217028	0.036043	0.0364514	0.144935	0.0308418	0.0275831	0	0.666945	37894	0	0
135089	cg25741744	chr3	41492621	+	0.943845	0.95082	-0.0069754	-0.0105119	0.000947406	0.969884	0.907541	0.0126686	0.968113	0.923712	0.0109567	0	0.666945	323085	0	0
379245	cg11349980	chr10	1016695	+	0.758955	0.738569	0.0203858	0.0387634	0.000947434	0.863667	0.628799	0.0458808	0.805949	0.599331	0.0480255	0	0.666945	149006	0	0
446579	cg07748540	chr11	104034619	-	0.00440681	0.00602275	-0.00161594	-0.153371	0.00094771	0.0122612	0.000731009	0.002262	0.0288417	0.00247717	0.00432402	0	0.666945	432086	0	0
193556	cg10416029	chr4	148482302	-	0.963489	0.966288	-0.00279854	-0.00414144	0.000951218	0.983916	0.935096	0.0101228	0.98375	0.944648	0.00837041	0	0.667968	472739	0	0
662086	cg19679796	chr19	19567926	+	0.937275	0.944212	-0.00693732	-0.010527	0.000952543	0.966019	0.900979	0.0143645	0.961704	0.912471	0.0112742	0	0.667968	322887	0	0
616061	cg22751080	chr17	45726749	+	0.0125534	0.0135416	-0.000988203	-0.0618677	0.000954293	0.0334049	0.000786818	0.00613137	0.0266104	0.0029774	0.00560932	0	0.667968	525153	0	0
5227	cg18324862	chr1	6328955	-	0.792865	0.801618	-0.00875274	-0.015643	0.000954917	0.849062	0.727782	0.0209327	0.857688	0.750806	0.0252941	0	0.667968	265895	0	0
101070	cg14274991	chr2	130585005	-	0.942045	0.949379	-0.00733336	-0.0110701	0.000956928	0.966369	0.902876	0.0112768	0.972328	0.932549	0.0109214	0	0.667968	315372	0	0
148508	cg21857668	chr3	111451273	-	0.970004	0.973812	-0.00380809	-0.00559515	0.000958165	0.984405	0.950559	0.00739702	0.988592	0.958953	0.00824557	0	0.667968	423300	0	0
173152	cg14178794	chr4	5713546	+	0.224686	0.211316	0.01337	0.0846245	0.000958396	0.38666	0.109709	0.050926	0.336742	0.106035	0.0586215	0	0.667968	55422	0	0
413590	cg03580836	chr10	134992080	-	0.967663	0.974	-0.0063364	-0.00932018	0.000959569	0.985998	0.937619	0.00970693	0.988892	0.949836	0.0103844	0	0.667968	341633	0	0
570767	cg10479434	chr16	11268097	+	0.977538	0.979496	-0.00195782	-0.00285735	0.000960763	0.988292	0.959854	0.00562013	0.988831	0.962697	0.00538753	0	0.667968	531167	0	0
113169	cg20909531	chr2	202213179	-	0.941429	0.94608	-0.00465088	-0.00703516	0.000961784	0.969327	0.903242	0.0121989	0.964626	0.905523	0.0119887	0	0.667968	385987	0	0
322334	cg20705893	chr7	157869970	+	0.688562	0.66138	0.0271819	0.0572585	0.000962746	0.850541	0.449808	0.0680742	0.810288	0.422405	0.0875793	0	0.667968	99668	0	0
366200	cg19146916	chr9	101998297	-	0.16547	0.139895	0.0255749	0.227272	0.000962966	0.37017	0.0818276	0.0570999	0.221009	0.0760615	0.0354923	0	0.667968	10507	0	0
506526	cg26886381	chr13	96296979	+	0.0157718	0.0169929	-0.00122104	-0.0667833	0.000963677	0.0390646	0.00468396	0.0068495	0.0377098	0.00813125	0.00632644	0	0.667968	487420	0	0
640883	cg03656833	chr18	46067547	+	0.0157663	0.0179496	-0.00218333	-0.117344	0.000963929	0.0358321	0.00571174	0.00569421	0.0271588	0.0078156	0.00434578	0	0.667968	368497	0	0
673482	cg12326725	chr19	49340456	+	0.0171283	0.0321193	-0.014991	-0.634685	0.000963989	0.124201	0.0020701	0.0189935	0.161793	0.00492608	0.0411171	0	0.667968	39922	0	0
304725	cg12778481	chr7	90779222	+	0.969413	0.971946	-0.00253292	-0.00372623	0.000966414	0.983897	0.954885	0.00661989	0.982071	0.960066	0.00679378	0	0.667968	489803	0	0
356571	cg00370495	chr9	4155739	+	0.955042	0.958463	-0.00342097	-0.00510516	0.000967352	0.977056	0.902716	0.0112366	0.980204	0.936354	0.0106996	0	0.667968	438453	0	0
275691	cg03339731	chr6	139695396	-	0.0160825	0.0199789	-0.00389634	-0.200862	0.000967642	0.0341459	0.00292801	0.00669782	0.0360514	0.00767991	0.00717804	0	0.667968	245292	0	0
438181	cg10553894	chr11	68550534	-	0.962179	0.965876	-0.0036972	-0.00547616	0.000967846	0.977881	0.944475	0.00790134	0.9803	0.951255	0.00855214	0	0.667968	426871	0	0
142274	cg00612752	chr3	58134895	+	0.916902	0.925196	-0.00829408	-0.0128521	0.000968436	0.950847	0.876187	0.0155129	0.947806	0.884199	0.014551	0	0.667968	293649	0	0
368800	cg12489503	chr9	117499425	+	0.94119	0.945764	-0.00457419	-0.00692117	0.000970905	0.970897	0.904476	0.0137596	0.970215	0.919822	0.0122084	0	0.667968	388593	0	0
523796	cg10071662	chr14	66973919	+	0.0630869	0.0741281	-0.0110412	-0.202974	0.000971496	0.17106	0.0151504	0.0290253	0.144681	0.0350825	0.0244243	0	0.667968	70581	0	0
634632	cg06920833	chr18	3666099	+	0.395786	0.332489	0.0632964	0.244659	0.000972008	0.741852	0.182245	0.121341	0.532268	0.191235	0.076638	0	0.667968	2195	0	0
300386	cg26130384	chr7	55980165	-	0.955554	0.960207	-0.00465264	-0.00693511	0.000972219	0.974523	0.933894	0.00801494	0.974728	0.944424	0.008969	0	0.667968	388277	0	0
239053	cg11914659	chr5	180670379	-	0.0372058	0.0419072	-0.00470141	-0.136971	0.000972599	0.0816715	0.0156024	0.0120752	0.0834368	0.0154827	0.0141368	0	0.667968	208020	0	0
97617	cg16508956	chr2	113279033	-	0.965694	0.969447	-0.00375315	-0.00553888	0.000973124	0.989833	0.921253	0.0123477	0.99033	0.940928	0.0135374	0	0.667968	425044	0	0
181018	cg05067889	chr4	54366688	-	0.945913	0.947724	-0.0018117	-0.00273168	0.000974116	0.967713	0.916726	0.0106542	0.970909	0.920744	0.0115103	0	0.668017	537751	0	0
52195	cg04837847	chr1	178482132	+	0.778985	0.790866	-0.011881	-0.021563	0.000976326	0.844694	0.689942	0.0340701	0.844038	0.722673	0.0264384	0	0.668765	223539	0	0
619826	cg20030714	chr17	55401727	-	0.964428	0.966634	-0.00220628	-0.00326283	0.000978465	0.979127	0.948041	0.00626905	0.9826	0.950219	0.00722545	0	0.668765	510948	0	0
145558	cg04546691	chr3	77143393	-	0.923733	0.928373	-0.00464005	-0.00715151	0.000978548	0.960444	0.860676	0.0198096	0.961316	0.887681	0.0168917	0	0.668765	383366	0	0
270528	cg19455931	chr6	111413399	+	0.852605	0.834252	0.0183537	0.0310276	0.000979293	0.931933	0.782917	0.0330395	0.912595	0.75825	0.038324	0	0.668765	177302	0	0
126943	cg15476980	chr3	4836672	+	0.961446	0.965196	-0.00374968	-0.00555793	0.000980291	0.979006	0.93919	0.00814767	0.981385	0.943923	0.0100767	0	0.668765	424442	0	0
401227	cg08949011	chr10	99400449	-	0.0104717	0.013414	-0.00294232	-0.193742	0.000980896	0.0228667	0.00317861	0.00398538	0.025778	0.00299002	0.00529409	0	0.668765	304252	0	0
387543	cg22239258	chr10	33271411	+	0.805853	0.819012	-0.0131592	-0.023084	0.000981665	0.892572	0.640731	0.0469526	0.896941	0.689726	0.0459064	0	0.668765	214663	0	0
619202	cg21551132	chr17	53046152	-	0.0392272	0.0379244	0.00130279	0.0386949	0.000985398	0.0613625	0.0227354	0.00730749	0.0505371	0.0195332	0.00624731	0	0.669216	474882	0	0
608783	cg01280279	chr17	32039522	+	0.759669	0.781308	-0.0216393	-0.0400018	0.000986223	0.864074	0.590888	0.0587678	0.852579	0.666633	0.0472322	0	0.669216	144956	0	0
126627	cg16907496	chr3	3020780	+	0.766814	0.776278	-0.00946377	-0.0174699	0.000987323	0.82699	0.676878	0.0241876	0.815598	0.711973	0.0234163	0	0.669216	250855	0	0
720362	cg10108828	chr22	43040685	+	0.823596	0.799238	0.0243571	0.0427827	0.000990132	0.926145	0.658113	0.0506541	0.90342	0.65925	0.0569222	0	0.669216	136458	0	0
178814	cg03629777	chr4	39183882	+	0.00397716	0.0046992	-0.000722044	-0.0726668	0.00099138	0.01309	0.000854295	0.00181472	0.0110147	0.00167428	0.0019949	0	0.669216	573133	0	0
467870	cg10767920	chr12	49110214	+	0.0205238	0.024229	-0.00370524	-0.165286	0.0009917	0.0403118	0.00241718	0.00849105	0.0475682	0.00806289	0.00922013	0	0.669216	255578	0	0
539409	cg27376339	chr15	25841862	+	0.937252	0.944745	-0.00749295	-0.0113671	0.000992821	0.966144	0.885725	0.0132774	0.965775	0.915625	0.0108131	0	0.669216	311402	0	0
130090	cg00393050	chr3	14435541	+	0.958954	0.963254	-0.00430093	-0.00638957	0.000993102	0.9759	0.934829	0.00819215	0.979677	0.945385	0.00825151	0	0.669216	401543	0	0
594553	cg02184744	chr16	89480774	-	0.973782	0.97841	-0.0046281	-0.00677109	0.000993366	0.989107	0.950002	0.00875281	0.989087	0.962769	0.00701886	0	0.669216	392107	0	0
27128	cg04898719	chr1	52456918	-	0.270556	0.246668	0.0238878	0.128384	0.000994666	0.425734	0.142781	0.0571866	0.37326	0.110318	0.0625142	0	0.669216	21532	0	0
593923	cg04699663	chr16	89043171	-	0.0483849	0.0447002	0.00368474	0.0940502	0.000994844	0.118083	0.0233309	0.0184909	0.0957623	0.0213489	0.0163728	0	0.669216	256758	0	0
705442	cg01795894	chr21	43107725	+	0.949835	0.954222	-0.00438649	-0.00657816	0.000995626	0.978166	0.917119	0.0123847	0.973926	0.939293	0.00935018	0	0.669216	396876	0	0
291943	cg12516528	chr7	21986445	+	0.917733	0.900136	0.0175973	0.027628	0.000996668	0.952153	0.831968	0.0233687	0.944129	0.773621	0.0380528	0	0.669216	191787	0	0
156116	cg23363832	chr3	139258939	+	0.0284515	0.0305026	-0.0020511	-0.0749747	0.000996897	0.0712949	0.0104139	0.0103082	0.0589077	0.0120853	0.00892473	0	0.669216	381876	0	0
400471	cg09323434	chr10	97802912	-	0.113144	0.0958449	0.0172994	0.218398	0.000997025	0.331855	0.0348488	0.0490853	0.195803	0.0313225	0.0372885	0	0.669216	29149	0	0
641267	cg00373974	chr18	47271292	+	0.841553	0.827934	0.0136188	0.0232594	0.00099723	0.921918	0.713001	0.0385949	0.88834	0.689991	0.0430955	0	0.669216	213664	0	0
503226	cg25692524	chr13	52769662	+	0.0707426	0.0516682	0.0190743	0.388801	0.000998943	0.300017	0.00881513	0.0595331	0.182997	0.00555658	0.0454544	0	0.669216	23036	0	0
571630	cg03391173	chr16	13644390	-	0.923506	0.935965	-0.0124588	-0.0191273	0.000998946	0.974502	0.780156	0.0339412	0.970494	0.876355	0.0194857	0	0.669216	239012	0	0
465442	cg12750791	chr12	32049519	+	0.0464974	0.033764	0.0127334	0.36844	0.00100419	0.141854	0.0157157	0.0250529	0.072638	0.014606	0.0133296	0	0.670061	55106	0	0
485869	cg17604071	chr12	114195388	+	0.578961	0.622111	-0.0431493	-0.102004	0.00100425	0.72746	0.291502	0.0938403	0.721417	0.459684	0.0569922	0	0.670061	37905	0	0
400474	cg24255928	chr10	97802966	-	0.0382708	0.0324344	0.00583638	0.185916	0.00100707	0.089764	0.0174806	0.0135524	0.0572494	0.014277	0.0107645	0	0.670061	167332	0	0
355252	cg01651710	chr8	145577079	-	0.838337	0.817417	0.0209195	0.0360221	0.00100782	0.910748	0.690001	0.0389011	0.887327	0.675998	0.0533962	0	0.670061	158231	0	0
717857	cg06218036	chr22	38608788	+	0.949691	0.951492	-0.00180169	-0.00270592	0.00100823	0.96694	0.928459	0.00799146	0.965855	0.938402	0.00665037	0	0.670061	539121	0	0
97540	cg19142179	chr2	112927013	-	0.964237	0.968112	-0.00387436	-0.00572595	0.00100844	0.981444	0.940909	0.00903802	0.982013	0.951732	0.00774996	0	0.670061	419394	0	0
455372	cg18999314	chr11	131560382	+	0.944315	0.94989	-0.00557463	-0.00840298	0.00100911	0.968242	0.885303	0.0154547	0.967607	0.918111	0.0113953	0	0.670061	357829	0	0
203533	cg27112066	chr5	5262780	-	0.908756	0.921187	-0.0124316	-0.0193902	0.00100935	0.962372	0.767019	0.0372479	0.970582	0.790925	0.0350481	0	0.670061	237212	0	0
111795	cg08958558	chr2	196581551	+	0.927111	0.932231	-0.00511926	-0.00785972	0.00101111	0.963181	0.883713	0.0150707	0.959835	0.902354	0.014087	0	0.670061	368237	0	0
566934	cg08318085	chr16	2321558	-	0.958909	0.962947	-0.00403768	-0.00599956	0.00101152	0.975819	0.937016	0.0088801	0.976846	0.947517	0.00850981	0	0.670061	411763	0	0
705157	cg08834883	chr21	42512339	+	0.952103	0.956693	-0.00458984	-0.00686621	0.0010116	0.969887	0.929183	0.00959303	0.976671	0.933717	0.00947568	0	0.670061	389869	0	0
476691	cg26058055	chr12	72105195	+	0.972055	0.967898	0.00415776	0.00612095	0.00101262	0.987109	0.949449	0.007415	0.980116	0.946611	0.00714962	0	0.670061	408574	0	0
253405	cg17166950	chr6	31940240	-	0.00832504	0.00995864	-0.0016336	-0.123197	0.0010134	0.0152738	0.00355741	0.00234551	0.0176526	0.00441124	0.00279213	0	0.670061	429748	0	0
477522	cg23523014	chr12	78746187	+	0.889629	0.896662	-0.00703255	-0.0112339	0.00101398	0.945403	0.82852	0.0260376	0.943494	0.841317	0.027447	0	0.670061	313182	0	0
650895	cg15793850	chr19	3547948	-	0.949543	0.953512	-0.00396869	-0.00595471	0.00101744	0.969188	0.926699	0.00788522	0.967093	0.938333	0.00762554	0	0.670061	412991	0	0
665268	cg07189258	chr19	36244945	-	0.9252	0.929776	-0.00457582	-0.00704172	0.00101792	0.956818	0.889876	0.0137421	0.959601	0.90325	0.0141688	0	0.670061	385850	0	0
76824	cg25050076	chr2	21125547	+	0.898125	0.910382	-0.0122575	-0.0193427	0.00101809	0.934379	0.839751	0.0189123	0.938853	0.854086	0.0175831	0	0.670061	237533	0	0
203467	cg01250006	chr5	5063651	-	0.610027	0.578867	0.0311599	0.074389	0.0010194	0.758417	0.401247	0.0682974	0.699268	0.413693	0.0700833	0	0.670061	69291	0	0
593906	cg07599366	chr16	89033692	+	0.233764	0.217818	0.0159455	0.0976	0.00101967	0.435091	0.134491	0.0525516	0.318662	0.127398	0.0449597	0	0.670061	41815	0	0
30447	cg17131560	chr1	64352886	-	0.785931	0.806912	-0.0209809	-0.037537	0.00102336	0.879352	0.61833	0.0569538	0.89874	0.687642	0.0521911	0	0.670061	153112	0	0
356102	cg13143440	chr9	738894	-	0.932694	0.938616	-0.00592247	-0.00903538	0.00102389	0.962005	0.890895	0.0145213	0.964733	0.904983	0.0145629	0	0.670061	346427	0	0
517904	cg12646504	chr14	37641090	+	0.0288264	0.0337729	-0.00494652	-0.173	0.0010257	0.0607299	0.010853	0.00920981	0.0512994	0.0161785	0.00914659	0	0.670061	198157	0	0
291963	cg11387705	chr7	22122473	-	0.0677585	0.0625839	0.00517453	0.0993494	0.00102801	0.0992955	0.0412276	0.0114293	0.0791068	0.0326142	0.0105429	0	0.670061	189605	0	0
665247	cg01419084	chr19	36236615	-	0.00580504	0.00689463	-0.00108959	-0.0961801	0.00102893	0.0123969	0.00165529	0.00229717	0.0137081	0.0016634	0.00247147	0	0.670061	508418	0	0
238566	cg13283353	chr5	179881397	+	0.717234	0.738031	-0.0207977	-0.0406798	0.00102907	0.841529	0.506966	0.0626156	0.848472	0.642853	0.0507723	0	0.670061	142810	0	0
619405	cg18899039	chr17	53828396	+	0.0213488	0.0259796	-0.00463086	-0.198771	0.0010293	0.0543384	0.00768819	0.00767374	0.0616624	0.0155125	0.00929123	0	0.670061	211014	0	0
505961	cg21970509	chr13	92228888	-	0.868843	0.888956	-0.020113	-0.032645	0.00102971	0.94637	0.760768	0.0396568	0.9593	0.761873	0.0412378	0	0.670061	170768	0	0
435135	cg26170077	chr11	65153953	-	0.0121399	0.0139304	-0.00179056	-0.1122	0.00102983	0.0267717	0.00158772	0.00482097	0.0295462	0.00446487	0.00536212	0	0.670061	410646	0	0
192468	cg03490431	chr4	141446649	+	0.960561	0.965643	-0.00508212	-0.00753463	0.00103019	0.980595	0.931375	0.00966426	0.982598	0.947369	0.00837159	0	0.670061	375121	0	0
551045	cg20563447	chr15	67359289	-	0.0516252	0.047526	0.00409916	0.0993052	0.00103204	0.0713281	0.0298369	0.00913561	0.0698418	0.0302833	0.010987	0	0.670061	235048	0	0
58813	cg15063808	chr1	205905200	-	0.914147	0.920868	-0.00672118	-0.0104545	0.00103213	0.94235	0.872531	0.015572	0.945776	0.882073	0.0143145	0	0.670061	323939	0	0
426500	cg20143092	chr11	35160330	-	0.0159881	0.0149449	0.00104317	0.0591044	0.0010325	0.03861	0.00660408	0.00581968	0.0267509	0.00665663	0.00541383	0	0.670061	515974	0	0
425775	cg20366522	chr11	33193745	+	0.953013	0.939382	0.0136308	0.0205662	0.00103436	0.987782	0.878645	0.0191345	0.985215	0.860977	0.0304627	0	0.670061	229623	0	0
411704	cg11065467	chr10	133218425	+	0.906849	0.915663	-0.00881459	-0.0138038	0.0010355	0.946578	0.8257	0.0174883	0.944058	0.879804	0.0160081	0	0.670061	283386	0	0
606005	cg19064492	chr17	20945241	+	0.11036	0.104634	0.00572652	0.0703274	0.00103563	0.140836	0.0754961	0.01298	0.1333	0.0695818	0.0155108	0	0.670061	170773	0	0
363786	cg19427069	chr9	93488722	+	0.979264	0.980324	-0.00105966	-0.00154454	0.00103564	0.991115	0.965668	0.00556748	0.98862	0.969328	0.00512512	0	0.670061	610168	0	0
539569	cg02242989	chr15	26147435	+	0.880262	0.886895	-0.00663351	-0.0107099	0.00103598	0.9324	0.835341	0.0197306	0.920031	0.837305	0.0200308	0	0.670061	320361	0	0
103946	cg13927054	chr2	151908353	-	0.0155402	0.0180406	-0.00250047	-0.134751	0.00103926	0.0272585	0.00802361	0.0039957	0.0247183	0.0127996	0.00314128	0	0.670061	339135	0	0
610289	cg06524162	chr17	36499074	-	0.919771	0.926378	-0.00660729	-0.0102161	0.00103934	0.950976	0.876187	0.0149421	0.944015	0.895169	0.0109328	0	0.670061	327455	0	0
665507	cg25468802	chr19	36484832	-	0.83861	0.811837	0.0267725	0.0462485	0.00104115	0.91993	0.69063	0.0430276	0.890796	0.685678	0.0482797	0	0.670061	126480	0	0
487449	cg21654404	chr12	118814431	-	0.120771	0.105734	0.0150364	0.176223	0.00104178	0.181809	0.0549784	0.0274141	0.155481	0.0527953	0.0287932	0	0.670061	39665	0	0
449864	cg04453624	chr11	117515073	+	0.879597	0.883437	-0.00384066	-0.00621515	0.0010423	0.929184	0.83132	0.0182667	0.929833	0.835518	0.0217286	0	0.670061	406095	0	0
333379	cg21658405	chr8	38126943	+	0.0304149	0.028539	0.00187589	0.0685678	0.00104294	0.0468591	0.018346	0.00579332	0.0425426	0.0187559	0.00620745	0	0.670061	400769	0	0
653745	cg26532951	chr19	7294093	+	0.0984517	0.091023	0.00742872	0.102369	0.00104371	0.16768	0.0495632	0.0211351	0.117594	0.054962	0.0158459	0	0.670061	126168	0	0
556691	cg05208249	chr15	81135497	-	0.830813	0.848865	-0.0180527	-0.0306475	0.00104455	0.914668	0.705414	0.0437745	0.912979	0.771607	0.0304397	0	0.670061	178921	0	0
598248	cg13693928	chr17	3600310	+	0.606812	0.600503	0.00630886	0.0148321	0.00104512	0.84582	0.347988	0.100469	0.733931	0.365796	0.0930975	0	0.670061	273251	0	0
674266	cg00999835	chr19	50170539	-	0.834292	0.844569	-0.0102768	-0.0174545	0.00104534	0.890014	0.778875	0.0235713	0.895255	0.789926	0.0261292	0	0.670061	250985	0	0
203427	cg06801941	chr5	4941407	-	0.959102	0.962091	-0.00298862	-0.00444229	0.00104646	0.975517	0.938217	0.00735846	0.973688	0.950189	0.00673534	0	0.670061	461387	0	0
321557	cg21638338	chr7	157276278	+	0.9641	0.967358	-0.00325786	-0.00481702	0.00104695	0.98236	0.911447	0.0117913	0.986117	0.920996	0.0127459	0	0.670061	447976	0	0
138791	cg21553656	chr3	49569379	+	0.934287	0.94232	-0.00803269	-0.0122206	0.00104895	0.96091	0.888946	0.0141368	0.96566	0.918954	0.0130938	0	0.670061	300861	0	0
429542	cg25444486	chr11	47587425	+	0.0216369	0.0194197	0.00221726	0.104829	0.00105063	0.0346192	0.0110768	0.00538949	0.0300471	0.0101887	0.00449956	0	0.670061	365250	0	0
164692	cg23431450	chr3	184426928	-	0.950233	0.943131	0.00710251	0.0107108	0.00105174	0.978697	0.904365	0.0161529	0.974011	0.882397	0.0201406	0	0.670061	320347	0	0
5153	cg18975791	chr1	6285107	-	0.948245	0.952072	-0.00382751	-0.00575106	0.00105437	0.971953	0.920068	0.0103198	0.971803	0.930505	0.0103893	0	0.670061	418658	0	0
505577	cg13278895	chr13	84451164	-	0.83477	0.843383	-0.00861279	-0.0146344	0.00105507	0.901443	0.711021	0.0391836	0.898208	0.713553	0.0386995	0	0.670061	275091	0	0
334766	cg20187858	chr8	42395886	+	0.0620753	0.071881	-0.00980567	-0.184023	0.00105622	0.139034	0.0215587	0.0213827	0.129753	0.0374404	0.0199625	0	0.670061	85464	0	0
554080	cg04614885	chr15	74832783	+	0.0142663	0.0164945	-0.00222818	-0.126737	0.00105923	0.0275279	0.00775121	0.00365291	0.0309149	0.0111293	0.00413349	0	0.670061	364128	0	0
389776	cg23812775	chr10	48416899	+	0.702636	0.646708	0.055928	0.117913	0.00105952	0.897024	0.44524	0.0918625	0.803692	0.465032	0.0762251	0	0.670061	26832	0	0
22605	cg13900113	chr1	41131309	+	0.0128786	0.0150813	-0.00220263	-0.132609	0.00106099	0.0238014	0.00415627	0.00419676	0.0271721	0.007033	0.00422363	0	0.670061	366664	0	0
413011	cg02210222	chr10	134652760	-	0.846995	0.819483	0.0275127	0.0470756	0.00106196	0.918512	0.707845	0.044568	0.906779	0.678893	0.0530737	0	0.670061	124249	0	0
706523	cg11142362	chr21	44589128	+	0.894387	0.90365	-0.00926308	-0.0147015	0.00106289	0.954441	0.802432	0.0251117	0.953741	0.835554	0.0253027	0	0.670061	274439	0	0
383042	cg23361613	chr10	12915529	-	0.960243	0.963518	-0.00327498	-0.0048615	0.00106411	0.983703	0.918433	0.0108205	0.985568	0.940723	0.0109026	0	0.670061	446480	0	0
665083	cg06791670	chr19	36103803	+	0.00826293	0.00928941	-0.00102648	-0.0788908	0.00106481	0.0148998	0.00335805	0.00204902	0.0154817	0.00532229	0.0025055	0	0.670061	518660	0	0
110069	cg24226308	chr2	182480167	-	0.975224	0.979388	-0.00416353	-0.00608394	0.00106503	0.994528	0.946243	0.00949532	0.994224	0.963661	0.00811453	0	0.670061	409531	0	0
193771	cg24715972	chr4	149863539	+	0.934654	0.941484	-0.00683054	-0.0103942	0.00106553	0.962444	0.894597	0.0130915	0.966089	0.917316	0.0118489	0	0.670061	324811	0	0
283673	cg22389147	chr6	169902378	+	0.836975	0.842724	-0.00574908	-0.00975961	0.00106613	0.890649	0.777128	0.0211092	0.884075	0.790945	0.0236708	0	0.670061	334456	0	0
443596	cg08612187	chr11	82904490	+	0.0134928	0.0148735	-0.00138065	-0.0823877	0.00106614	0.0255606	0.00450172	0.00417567	0.0226753	0.00709774	0.00385884	0	0.670061	463524	0	0
493534	cg12115397	chr12	132566291	-	0.881132	0.891559	-0.0104267	-0.0167823	0.0010662	0.934371	0.805688	0.0253456	0.934463	0.860473	0.0192015	0	0.670061	256217	0	0
264897	cg12524311	chr6	72096292	+	0.928214	0.933649	-0.00543469	-0.00833283	0.00106622	0.971565	0.869789	0.0194284	0.964027	0.87534	0.0213848	0	0.670061	359142	0	0
304046	cg22363670	chr7	86273169	+	0.0214421	0.0241024	-0.00266022	-0.117172	0.00106624	0.0494573	0.00610828	0.00755768	0.0477385	0.0102425	0.00866991	0	0.670061	325878	0	0
139849	cg18017383	chr3	51379874	-	0.810808	0.823306	-0.0124984	-0.0218023	0.00106651	0.862589	0.746034	0.0203082	0.861351	0.78109	0.020196	0	0.670061	222100	0	0
280929	cg06043792	chr6	162684526	-	0.911251	0.915931	-0.00467967	-0.0073099	0.00106667	0.948883	0.838617	0.0209637	0.956437	0.872152	0.0204465	0	0.670061	379926	0	0
711730	cg08439561	chr22	23476327	+	0.935723	0.942319	-0.0065954	-0.0100263	0.00106739	0.967515	0.900239	0.0130558	0.96466	0.917945	0.0117286	0	0.670061	330365	0	0
70721	cg21198880	chr2	423400	-	0.870707	0.879988	-0.00928125	-0.0151242	0.00106769	0.925072	0.811512	0.0223086	0.927412	0.843543	0.0196987	0	0.670061	270619	0	0
665597	cg27221050	chr19	36597770	+	0.940731	0.946824	-0.00609236	-0.0092154	0.00107117	0.965901	0.902158	0.0119549	0.968562	0.924555	0.0118373	0	0.67131	343330	0	0
707632	cg15021280	chr21	46077582	+	0.519909	0.580092	-0.0601834	-0.155196	0.00107153	0.831589	0.144563	0.137933	0.790476	0.257031	0.122241	0	0.67131	12226	0	0
280146	cg06805546	chr6	159466427	+	0.0262842	0.0320909	-0.00580665	-0.214165	0.00107274	0.0835004	0.000981636	0.0167825	0.0856723	0.00262527	0.0234654	0	0.671484	168186	0	0
22834	cg13115781	chr1	41467201	+	0.968755	0.971259	-0.00250387	-0.00368602	0.00107576	0.982465	0.951757	0.00619185	0.981114	0.952689	0.00616659	0	0.671925	491499	0	0
243312	cg05297931	chr6	13429841	-	0.90233	0.909386	-0.00705604	-0.011115	0.00107693	0.945067	0.86336	0.0176052	0.943253	0.873592	0.0166237	0	0.671925	314799	0	0
503879	cg20897026	chr13	64416816	+	0.855275	0.86314	-0.00786468	-0.0130537	0.00107749	0.903133	0.8168	0.0184751	0.902751	0.82719	0.0183745	0	0.671925	291407	0	0
410553	cg11690632	chr10	130118794	-	0.920584	0.929339	-0.00875516	-0.0135098	0.00107768	0.959854	0.872526	0.0183175	0.960057	0.889936	0.0166327	0	0.671925	286414	0	0
607133	cg21200055	chr17	27066944	-	0.957697	0.960065	-0.00236828	-0.00352645	0.00107901	0.97742	0.931172	0.00993588	0.980528	0.940709	0.00974295	0	0.671925	498617	0	0
82741	cg00360761	chr2	43398079	-	0.168976	0.154944	0.0140315	0.117786	0.00107911	0.399582	0.0587597	0.0613309	0.279876	0.0670884	0.0505549	0	0.671925	45644	0	0
388719	cg12083972	chr10	43705440	+	0.935457	0.93905	-0.00359314	-0.00547247	0.00107993	0.962841	0.900178	0.0126476	0.956022	0.908765	0.0114173	0	0.671925	426977	0	0
386669	cg26508239	chr10	29759299	+	0.960751	0.966182	-0.00543073	-0.00804846	0.00108229	0.981983	0.928059	0.0109852	0.982555	0.93857	0.0100235	0	0.672409	364560	0	0
150049	cg07073622	chr3	119318487	+	0.920172	0.927192	-0.00702037	-0.0108477	0.00108458	0.956175	0.868421	0.0166043	0.961251	0.878332	0.0175299	0	0.672409	318351	0	0
335905	cg05522014	chr8	52730616	-	0.926378	0.937183	-0.0108054	-0.0165528	0.00108865	0.965628	0.867527	0.0186439	0.972352	0.873056	0.0193618	0	0.672409	258093	0	0
486899	cg09184853	chr12	117318548	-	0.0887518	0.111894	-0.0231422	-0.303748	0.00108993	0.28454	0.0210904	0.042441	0.328417	0.0610187	0.0573799	0	0.672409	13941	0	0
471348	cg00796424	chr12	54365966	+	0.342702	0.27442	0.0682815	0.310424	0.0010903	0.741848	0.101345	0.14297	0.544928	0.08986	0.118201	0	0.672409	1170	0	0
460502	cg17537007	chr12	8023676	-	0.928958	0.933456	-0.0044977	-0.00689415	0.00109061	0.959475	0.896509	0.0138879	0.955475	0.891468	0.0137173	0	0.672409	389180	0	0
30518	cg16910238	chr1	64668576	+	0.956264	0.960775	-0.00451134	-0.00672005	0.00109317	0.978596	0.935989	0.00834969	0.981954	0.943266	0.00882614	0	0.672409	393338	0	0
216111	cg14430679	chr5	83269314	+	0.904523	0.913363	-0.00883967	-0.013878	0.00109349	0.943212	0.835217	0.0225732	0.951737	0.854062	0.0230086	0	0.672409	282628	0	0
193504	cg22491627	chr4	148081961	+	0.920445	0.909986	0.0104589	0.0163088	0.00109559	0.968121	0.853186	0.0238149	0.952457	0.862648	0.0253535	0	0.672409	260194	0	0
489336	cg25705464	chr12	122688023	-	0.0349168	0.0391002	-0.00418345	-0.128475	0.0010957	0.0544744	0.021888	0.00636584	0.053463	0.0265744	0.00568487	0	0.672409	230975	0	0
142105	cg23670415	chr3	57583409	-	0.0127513	0.0141651	-0.00141376	-0.0869734	0.00109814	0.0237531	0.00376045	0.00429501	0.0299604	0.00397397	0.00502887	0	0.672409	458890	0	0
553198	cg15777859	chr15	72907050	+	0.952231	0.956386	-0.00415582	-0.0062175	0.00109947	0.973524	0.929729	0.00915833	0.974376	0.936681	0.00904751	0	0.672409	406020	0	0
11117	cg21908208	chr1	17865737	-	0.0888251	0.079572	0.00925316	0.141831	0.00110001	0.174245	0.0379199	0.0258061	0.14143	0.0447242	0.0232947	0	0.672409	93479	0	0
425152	cg03400849	chr11	31149006	+	0.771184	0.806315	-0.035131	-0.0634636	0.00110005	0.913886	0.460965	0.0873887	0.912064	0.630853	0.0721499	0	0.672409	87324	0	0
39387	cg17966227	chr1	113738233	+	0.837034	0.802718	0.0343164	0.0596657	0.00110008	0.933921	0.621279	0.0720226	0.912225	0.605046	0.0868419	0	0.672409	94753	0	0
609722	cg06405340	chr17	34900057	-	0.0254651	0.0242496	0.00121551	0.0503132	0.00110025	0.036433	0.0152489	0.00394219	0.0305726	0.0171054	0.00386391	0	0.672409	488252	0	0
720798	cg26221509	chr22	43608569	-	0.927399	0.933228	-0.00582951	-0.00894407	0.0011003	0.958389	0.865434	0.0169038	0.965552	0.904048	0.0151863	0	0.672409	347995	0	0
151403	cg26162691	chr3	124170647	+	0.0841646	0.0751047	0.00905988	0.145946	0.00110045	0.164483	0.0460323	0.0244854	0.130283	0.0402359	0.0210864	0	0.672409	96340	0	0
272042	cg14888953	chr6	121147979	-	0.960944	0.967446	-0.00650213	-0.00962911	0.00110085	0.97956	0.932931	0.0101758	0.981482	0.948473	0.0078242	0	0.672409	336563	0	0
473848	cg13138226	chr12	57970710	-	0.927923	0.933324	-0.00540114	-0.00828409	0.00110229	0.965981	0.872261	0.0170563	0.964669	0.891503	0.0170501	0	0.672409	360005	0	0
400870	cg01432110	chr10	98832638	+	0.00800748	0.0103418	-0.00233427	-0.175847	0.00110259	0.0280237	0.00177352	0.00369785	0.0315388	0.00385779	0.00585604	0	0.672409	354023	0	0
381476	cg03261682	chr10	6233757	-	0.963107	0.966779	-0.00367223	-0.00543408	0.00110327	0.978993	0.939249	0.0081329	0.980149	0.95108	0.00683079	0	0.672409	428151	0	0
300110	cg02929993	chr7	55195359	-	0.606075	0.554983	0.0510922	0.124899	0.00110399	0.820913	0.314453	0.105229	0.747359	0.295477	0.0997954	0	0.672409	23232	0	0
565067	cg18055018	chr16	1251966	+	0.941938	0.94681	-0.00487153	-0.00736414	0.0011047	0.973341	0.870947	0.016737	0.971499	0.916555	0.0121655	0	0.672409	378680	0	0
265753	cg05068340	chr6	78176512	+	0.0241335	0.0289551	-0.00482155	-0.190622	0.00110511	0.0782658	0.00686752	0.0105173	0.0529256	0.011484	0.0104164	0	0.672409	203113	0	0
296790	cg17008884	chr7	39606002	+	0.0269498	0.0251839	0.00176588	0.0706504	0.0011056	0.0457058	0.0153981	0.00617206	0.0342553	0.0157211	0.00465222	0	0.672409	413584	0	0
623038	cg10696787	chr17	65242740	-	0.146382	0.138655	0.00772653	0.073102	0.00110882	0.228674	0.08275	0.0314533	0.223813	0.0653287	0.0333089	0	0.672409	119876	0	0
457719	cg12588957	chr12	2881593	-	0.839644	0.857479	-0.0178356	-0.0299713	0.00111046	0.882856	0.773148	0.0217389	0.907379	0.821144	0.0216291	0	0.672409	181636	0	0
424565	cg26972207	chr11	27352501	-	0.957508	0.96193	-0.00442225	-0.0065792	0.00111093	0.980152	0.925896	0.0106457	0.98017	0.936874	0.00941231	0	0.672409	396852	0	0
309596	cg02236157	chr7	105550877	+	0.898938	0.903643	-0.00470442	-0.00744775	0.00111127	0.964915	0.754393	0.0437996	0.962226	0.74932	0.0432289	0	0.672409	376924	0	0
471621	cg16370398	chr12	54448913	+	0.43728	0.37321	0.0640697	0.223042	0.00111351	0.761403	0.177242	0.109691	0.532421	0.178417	0.101626	0	0.672409	3236	0	0
720781	cg13754251	chr22	43583855	+	0.0660258	0.0585478	0.00747798	0.149378	0.00111476	0.131966	0.0335582	0.0153519	0.0786871	0.0338604	0.0119488	0	0.672409	125081	0	0
162057	cg24599434	chr3	172166242	-	0.0795992	0.094571	-0.0149718	-0.222925	0.00111531	0.167898	0.0378541	0.0228227	0.201819	0.0504061	0.0384152	0	0.672409	40025	0	0
459166	cg01887322	chr12	6343862	+	0.944839	0.951088	-0.00624907	-0.00941115	0.00111592	0.976197	0.885874	0.0195459	0.978482	0.879238	0.0197243	0	0.672409	340123	0	0
659347	cg02987026	chr19	15904110	-	0.880572	0.899703	-0.0191311	-0.0306635	0.00111622	0.958678	0.717053	0.0509616	0.953186	0.721828	0.046211	0	0.672409	178860	0	0
341290	cg13580934	chr8	86019138	+	0.0158578	0.0201498	-0.00429198	-0.221548	0.00111689	0.0361089	0.00565556	0.00523623	0.0338829	0.0110325	0.00605385	0	0.672409	225834	0	0
270182	cg00930347	chr6	110012366	-	0.0148934	0.0166093	-0.00171589	-0.0961665	0.00111753	0.0233899	0.0101511	0.00268111	0.0230636	0.0105654	0.0033743	0	0.672409	419608	0	0
189173	cg10345283	chr4	112244726	+	0.931792	0.940808	-0.00901582	-0.0137453	0.00111756	0.966247	0.842914	0.0180314	0.974048	0.905798	0.0148237	0	0.672409	283942	0	0
467264	cg07523122	chr12	47630089	+	0.968894	0.972424	-0.00353081	-0.00519435	0.00111767	0.983887	0.950828	0.00717086	0.983261	0.946084	0.00734323	0	0.672409	435566	0	0
721693	cg01883819	chr22	45593503	+	0.958943	0.962058	-0.00311457	-0.00462997	0.00111781	0.976597	0.935936	0.00872042	0.978926	0.944478	0.0083912	0	0.672409	454581	0	0
560297	cg20937204	chr15	92875587	-	0.88599	0.89977	-0.0137799	-0.0220192	0.00111964	0.946937	0.802714	0.0292935	0.950997	0.830749	0.0297767	0	0.672657	220793	0	0
569170	cg01482556	chr16	4674718	-	0.0244995	0.0221884	0.00231114	0.100036	0.00112008	0.0398523	0.0151097	0.00489139	0.0379068	0.0144684	0.00515867	0	0.672657	356184	0	0
531130	cg10892262	chr14	93304861	+	0.973724	0.975942	-0.00221816	-0.00324941	0.00112124	0.987519	0.959359	0.00626405	0.988207	0.963228	0.00647844	0	0.672667	511535	0	0
3945	cg17801268	chr1	3566797	+	0.00423135	0.00572033	-0.00148899	-0.14356	0.00112416	0.0118091	0.000298512	0.00227746	0.0110727	0.000464858	0.00267205	0	0.672667	448657	0	0
156819	cg19893077	chr3	142314877	+	0.0125672	0.0152525	-0.00268527	-0.162197	0.0011242	0.025954	0.00269542	0.00546612	0.0406386	0.00488343	0.00704838	0	0.672667	323868	0	0
171989	cg23728864	chr4	3239305	+	0.892279	0.901034	-0.00875524	-0.0139317	0.00112504	0.931487	0.850701	0.0182584	0.933236	0.86461	0.0178264	0	0.672667	282069	0	0
407260	cg18014947	chr10	120000991	-	0.0219348	0.025479	-0.00354416	-0.151834	0.00112613	0.0358393	0.010197	0.0057418	0.0365084	0.0161915	0.00533998	0	0.672667	264842	0	0
45372	cg16692668	chr1	155298166	+	0.929995	0.936292	-0.00629708	-0.00963247	0.00112721	0.954811	0.903941	0.0103355	0.962152	0.915575	0.0106004	0	0.672667	336494	0	0
81756	cg02375320	chr2	38978881	-	0.213529	0.189155	0.0243737	0.166568	0.00112801	0.389348	0.0825377	0.0686757	0.314922	0.0778435	0.0597055	0	0.672667	12090	0	0
4900	cg12604162	chr1	6086148	-	0.0134891	0.0157097	-0.00222058	-0.13032	0.0011301	0.0212201	0.00827832	0.00268358	0.0249423	0.00937959	0.00345754	0	0.672667	364901	0	0
715062	cg14703589	chr22	31644558	-	0.854627	0.864702	-0.0100741	-0.0167123	0.00113047	0.904758	0.760532	0.0232072	0.904565	0.829086	0.0180341	0	0.672667	256731	0	0
109857	cg23417306	chr2	180868811	+	0.912315	0.892565	0.0197496	0.0312281	0.00113197	0.971204	0.828436	0.0348157	0.950822	0.812644	0.0344035	0	0.672667	176504	0	0
394927	cg20735844	chr10	75038960	-	0.959666	0.96256	-0.00289348	-0.00429859	0.00113231	0.977387	0.939232	0.00906439	0.980211	0.947539	0.0084586	0	0.672667	466681	0	0
609872	cg05119076	chr17	35215768	+	0.976256	0.979682	-0.00342634	-0.00500337	0.00113233	0.990083	0.958558	0.0069775	0.99075	0.965016	0.00620471	0	0.672667	441775	0	0
667965	cg24318575	chr19	40865255	+	0.933385	0.940605	-0.00722006	-0.0109994	0.00113295	0.960798	0.895268	0.0139066	0.960667	0.904687	0.0123354	0	0.672667	316286	0	0
41539	cg03436297	chr1	145592743	-	0.970318	0.962068	0.00824987	0.0121924	0.00113368	0.989648	0.932271	0.00991811	0.986738	0.942367	0.0114636	0	0.672667	301204	0	0
666573	cg11682124	chr19	38810437	-	0.0147639	0.0175604	-0.00279655	-0.154361	0.00113603	0.0250011	0.00507855	0.00457926	0.038855	0.00832913	0.00672188	0	0.672667	315132	0	0
462827	cg23704770	chr12	16758943	+	0.0314652	0.0329078	-0.00144264	-0.0493402	0.00113618	0.0906704	0.00694771	0.0160832	0.0735607	0.00958606	0.013978	0	0.672667	454902	0	0
249099	cg20210151	chr6	30026635	-	0.953721	0.941522	0.0121993	0.018379	0.00113805	0.986778	0.887075	0.0171296	0.979426	0.864725	0.0233366	0	0.672667	244121	0	0
254471	cg08563982	chr6	32306373	-	0.972427	0.975275	-0.00284841	-0.00417684	0.00113839	0.989494	0.950722	0.00845897	0.988051	0.96304	0.00750073	0	0.672667	471314	0	0
29513	cg07489891	chr1	59889088	-	0.879966	0.902339	-0.0223736	-0.0358207	0.00114189	0.959994	0.698656	0.069814	0.951924	0.693149	0.0584767	0	0.672667	158928	0	0
315285	cg14155504	chr7	136438610	-	0.963408	0.967329	-0.00392178	-0.00580083	0.00114199	0.97951	0.942611	0.00895474	0.983993	0.950345	0.00761592	0	0.672667	417274	0	0
12453	cg13335686	chr1	20628455	-	0.71258	0.742043	-0.0294628	-0.0576575	0.00114505	0.837918	0.56285	0.0624597	0.836756	0.623764	0.0529387	0	0.672667	98811	0	0
467491	cg19008693	chr12	48270864	+	0.973044	0.975246	-0.00220256	-0.00322882	0.00114672	0.986146	0.957288	0.00563173	0.984858	0.963743	0.00600735	0	0.672667	512592	0	0
120213	cg27383418	chr2	232055581	-	0.268806	0.241319	0.0274871	0.149742	0.00114694	0.485062	0.120336	0.0693922	0.465402	0.110435	0.0753178	0	0.672667	13710	0	0
362653	cg04355676	chr9	86316837	+	0.926491	0.917276	0.00921519	0.0142666	0.00114759	0.963664	0.869373	0.0181256	0.951337	0.868802	0.0194795	0	0.672667	278642	0	0
717531	cg16854977	chr22	38236257	+	0.966565	0.963554	0.00301147	0.00445576	0.00114789	0.979474	0.947445	0.00754266	0.976457	0.946911	0.0091938	0	0.672667	460881	0	0
721871	cg18855195	chr22	45828264	-	0.320728	0.294621	0.0261072	0.11863	0.00114855	0.678868	0.123846	0.103904	0.562736	0.154054	0.0965222	0	0.672667	26447	0	0
219791	cg23622299	chr5	112508197	-	0.267539	0.214409	0.0531297	0.306558	0.00114888	0.575135	0.0458316	0.135621	0.539566	0.051132	0.126635	0	0.672667	1234	0	0
347660	cg14342919	chr8	123834707	-	0.938909	0.944126	-0.00521637	-0.00790911	0.00115074	0.96256	0.909435	0.0109302	0.962543	0.923491	0.0104568	0	0.672667	367250	0	0
19313	cg16135547	chr1	33381671	+	0.914646	0.917726	-0.00308031	-0.00479812	0.00115109	0.961936	0.811171	0.0228711	0.956321	0.851742	0.0255116	0	0.672667	448636	0	0
594140	cg03090204	chr16	89179240	+	0.866796	0.871684	-0.00488774	-0.00802004	0.0011512	0.904794	0.820216	0.0150464	0.906687	0.839837	0.0159162	0	0.672667	365116	0	0
619165	cg03944691	chr17	52976555	-	0.965181	0.966453	-0.00127216	-0.00188083	0.00115258	0.981943	0.939764	0.00850679	0.985859	0.95084	0.00927806	0	0.672667	587951	0	0
76614	cg10695013	chr2	20553543	+	0.956625	0.961259	-0.00463428	-0.00690018	0.00115582	0.974029	0.932338	0.00884889	0.978814	0.942576	0.00884562	0	0.672667	389058	0	0
703155	cg10781604	chr21	35576824	+	0.949151	0.951511	-0.00236034	-0.00354592	0.00115613	0.965926	0.925733	0.00732672	0.963806	0.937637	0.00753518	0	0.672667	497698	0	0
444047	cg07180834	chr11	85838833	+	0.846127	0.833657	0.0124703	0.0211688	0.00115728	0.927612	0.672203	0.0421155	0.923026	0.714766	0.0452856	0	0.672667	225883	0	0
152750	cg06415233	chr3	127410671	+	0.862236	0.873449	-0.0112136	-0.0184292	0.0011574	0.926725	0.799345	0.0251432	0.92221	0.797386	0.0289449	0	0.672667	243780	0	0
277617	cg11182199	chr6	150161689	-	0.915142	0.919855	-0.00471263	-0.00733037	0.00115934	0.945445	0.887982	0.011966	0.949971	0.894693	0.0112716	0	0.672667	379445	0	0
175356	cg27085846	chr4	10117147	+	0.0513095	0.0490182	0.00229122	0.0549489	0.00116008	0.0979464	0.0278795	0.012412	0.0831183	0.0321288	0.0116336	0	0.672667	358136	0	0
249785	cg02957290	chr6	30298765	-	0.977467	0.979579	-0.00211139	-0.00308146	0.00116024	0.989624	0.957842	0.00594075	0.990778	0.961806	0.00638036	0	0.672667	519683	0	0
169893	cg09216008	chr4	939597	+	0.959668	0.963354	-0.00368571	-0.00547329	0.00116034	0.981966	0.893961	0.0128713	0.981656	0.933865	0.0111592	0	0.672667	426954	0	0
374406	cg14602211	chr9	134888591	+	0.975528	0.970862	0.00466568	0.00684622	0.00116081	0.989338	0.947635	0.00765365	0.983255	0.944198	0.0094778	0	0.672667	390368	0	0
260470	cg18371976	chr6	42227082	-	0.963694	0.968288	-0.00459369	-0.00679034	0.00116093	0.980691	0.937534	0.00819215	0.982529	0.952622	0.00651678	0	0.672667	391674	0	0
635006	cg10334948	chr18	6355911	-	0.932275	0.936483	-0.00420776	-0.00642806	0.0011621	0.963761	0.884596	0.0136753	0.966542	0.903055	0.0145479	0	0.672667	400550	0	0
472370	cg24620454	chr12	56211520	+	0.0211221	0.0232167	-0.00209458	-0.0939687	0.00116239	0.0335986	0.00902348	0.00477451	0.0337727	0.013106	0.00523203	0	0.672667	377470	0	0
270912	cg21118091	chr6	112511472	-	0.958625	0.96429	-0.00566517	-0.00841326	0.00116268	0.978152	0.93535	0.0095714	0.987648	0.944465	0.00946102	0	0.672667	357639	0	0
181479	cg11139063	chr4	56278054	+	0.970887	0.973752	-0.00286494	-0.00420764	0.00116278	0.98545	0.950625	0.00770553	0.989052	0.957827	0.00782162	0	0.672667	470183	0	0
277187	cg12355586	chr6	148869895	-	0.961233	0.953319	0.00791431	0.0118043	0.00116293	0.982852	0.923582	0.0124959	0.978835	0.911125	0.0150116	0	0.672667	305924	0	0
640668	cg16154470	chr18	45276121	+	0.973361	0.976589	-0.00322861	-0.00472895	0.00116371	0.986614	0.948306	0.00671917	0.987546	0.960324	0.00637176	0	0.672667	451080	0	0
103118	cg23267345	chr2	145275877	+	0.019675	0.0217653	-0.00209029	-0.0982032	0.00116564	0.0452183	0.0058969	0.00756665	0.045977	0.00691534	0.00854025	0	0.672819	377902	0	0
700781	cg09618141	chr21	19192457	+	0.0103332	0.0126822	-0.00234907	-0.157728	0.00116583	0.0278278	0.000785749	0.00488147	0.0379881	0.00376423	0.00715014	0	0.672819	352579	0	0
330061	cg05466228	chr8	24242846	-	0.971474	0.974227	-0.00275356	-0.00404186	0.00116762	0.985855	0.947928	0.00733516	0.987588	0.959887	0.00701595	0	0.673242	476665	0	0
704796	cg17935304	chr21	40555523	+	0.0138893	0.0168229	-0.00293362	-0.167102	0.00116842	0.0313702	0.00176641	0.0049785	0.043315	0.0069897	0.00738154	0	0.673242	304914	0	0
606463	cg13200730	chr17	25827857	+	0.928156	0.930752	-0.00259585	-0.00398638	0.00116961	0.968861	0.839762	0.0159139	0.956375	0.893942	0.0170194	0	0.673392	478892	0	0
611544	cg16252131	chr17	38257290	-	0.0128452	0.0140652	-0.00121994	-0.075054	0.00117203	0.0245235	0.00407045	0.00397363	0.0285014	0.00675265	0.00430614	0	0.67367	487579	0	0
719220	cg15649555	chr22	41040955	+	0.834169	0.861636	-0.0274676	-0.046195	0.00117238	0.93196	0.72186	0.0424011	0.924202	0.812319	0.0300149	0	0.67367	126617	0	0
441900	cg15761248	chr11	75296733	-	0.829274	0.841113	-0.0118392	-0.0202092	0.00117349	0.878757	0.778623	0.0223475	0.882239	0.799374	0.0201799	0	0.67367	231852	0	0
161766	cg21413905	chr3	171178386	+	0.0256208	0.0296706	-0.00404977	-0.155349	0.00117381	0.0561399	0.00587408	0.00921683	0.0457051	0.00890367	0.00969323	0	0.67367	237552	0	0
690608	cg16186051	chr20	40247245	-	0.0278029	0.0247093	0.00309353	0.123172	0.00117764	0.0448438	0.0165118	0.0055925	0.0353817	0.0153454	0.00486466	0	0.674912	293733	0	0
151159	cg11733626	chr3	123304043	+	0.019362	0.0223224	-0.00296041	-0.138584	0.00117784	0.0286075	0.0106248	0.0042663	0.0326452	0.013715	0.0049969	0	0.674912	302976	0	0
408112	cg14968358	chr10	123268840	-	0.871258	0.826418	0.0448399	0.0753402	0.00118474	0.960497	0.595204	0.0786844	0.939057	0.629129	0.0963667	0	0.675793	67832	0	0
391941	cg10901421	chr10	63775908	+	0.919969	0.926217	-0.00624862	-0.0096613	0.00118527	0.97033	0.822224	0.0253787	0.964703	0.872578	0.0231816	0	0.675793	336018	0	0
720124	cg12875413	chr22	42606991	-	0.957931	0.959911	-0.00197973	-0.00294776	0.00118834	0.975385	0.929493	0.00894901	0.977497	0.944484	0.00712319	0	0.675793	526452	0	0
125401	cg03087247	chr2	242006772	-	0.94754	0.957625	-0.0100856	-0.0151162	0.00119035	0.981239	0.83219	0.0261705	0.979675	0.924465	0.0138514	0	0.675793	270684	0	0
66360	cg01384487	chr1	232059544	+	0.946063	0.951977	-0.0059135	-0.00889595	0.00119077	0.967167	0.910314	0.0104709	0.970379	0.918878	0.0109687	0	0.675793	348873	0	0
448689	cg20178075	chr11	113860607	-	0.872804	0.889021	-0.0162171	-0.0262617	0.00119325	0.948729	0.662014	0.0529877	0.94768	0.769978	0.034225	0	0.675793	198087	0	0
428816	cg03492894	chr11	46391995	-	0.897278	0.905364	-0.00808553	-0.0128001	0.00119519	0.934162	0.853691	0.0176836	0.942625	0.881171	0.0161084	0	0.675793	294210	0	0
535925	cg08794574	chr14	103292047	-	0.952542	0.953361	-0.00081889	-0.00122686	0.00119566	0.975333	0.925015	0.0106991	0.969781	0.917494	0.0119278	0	0.675793	632386	0	0
541133	cg09825467	chr15	34166691	-	0.917818	0.925508	-0.0076898	-0.0119078	0.00119601	0.946421	0.884678	0.0141574	0.94891	0.893262	0.0114752	0	0.675793	304627	0	0
126482	cg08707471	chr3	353166	-	0.51968	0.468186	0.0514941	0.147549	0.00119777	0.731895	0.269551	0.0881665	0.644758	0.251937	0.082824	0	0.675793	14356	0	0
682928	cg21857363	chr20	10199473	+	0.01057	0.0128266	-0.00225656	-0.150172	0.00119788	0.019118	0.00415062	0.00292483	0.019063	0.0065705	0.00339048	0	0.675793	361373	0	0
355086	cg18925846	chr8	145164991	+	0.893884	0.811957	0.0819271	0.137075	0.00119798	0.980361	0.591015	0.101716	0.984249	0.379734	0.169448	0	0.675793	17997	0	0
104162	cg18334412	chr2	152955206	-	0.0147145	0.0159	-0.00118553	-0.0675961	0.0011985	0.036811	0.00403672	0.00543752	0.0263422	0.00684739	0.0054227	0	0.675793	492973	0	0
414704	cg19309118	chr11	548855	+	0.911619	0.91858	-0.00696147	-0.0108565	0.00119857	0.95256	0.853941	0.0191953	0.959056	0.883437	0.020531	0	0.675793	318228	0	0
500595	cg21110887	chr13	43136120	+	0.89371	0.901579	-0.0078692	-0.0125081	0.00119863	0.939622	0.81793	0.0246845	0.941729	0.846225	0.0223617	0	0.675793	297513	0	0
614512	cg10308265	chr17	42290028	+	0.927099	0.932837	-0.00573802	-0.00880693	0.00119895	0.956223	0.893759	0.0138432	0.954609	0.912534	0.0110776	0	0.675793	350416	0	0
160382	cg19459508	chr3	160282885	+	0.0177833	0.0164551	0.00132825	0.0706747	0.00119916	0.0311001	0.00388105	0.00555582	0.0338036	0.00416406	0.00600525	0	0.675793	471104	0	0
151236	cg26394191	chr3	123459423	+	0.839284	0.851237	-0.0119539	-0.0201647	0.00119922	0.901878	0.72311	0.035185	0.902354	0.761098	0.0298066	0	0.675793	232140	0	0
173563	cg07867360	chr4	6475156	+	0.847095	0.808422	0.0386735	0.066611	0.00120067	0.939901	0.647953	0.0597286	0.907629	0.608686	0.0720809	0	0.675793	81742	0	0
654212	cg23228218	chr19	7908919	-	0.936439	0.925155	0.0112836	0.0173034	0.00120425	0.967731	0.831201	0.0236992	0.958507	0.817617	0.0258312	0	0.675793	252167	0	0
200033	cg13866688	chr4	188045495	+	0.787937	0.757123	0.0308147	0.0568182	0.00120742	0.882124	0.600209	0.0437154	0.856992	0.608535	0.0666284	0	0.675793	100595	0	0
566345	cg09351715	chr16	2028206	-	0.94202	0.94397	-0.0019501	-0.00295216	0.00120859	0.96411	0.920046	0.00846135	0.965707	0.924539	0.00982641	0	0.675793	526220	0	0
279151	cg11071155	chr6	157012049	+	0.917786	0.925494	-0.0077082	-0.0119366	0.00121009	0.945861	0.88049	0.0148584	0.945979	0.89662	0.0115554	0	0.675793	304290	0	0
279825	cg18978680	chr6	158734097	+	0.949979	0.954688	-0.00470841	-0.00705869	0.00121094	0.969622	0.919797	0.00984297	0.968583	0.934567	0.00787154	0	0.675793	385431	0	0
388761	cg01330050	chr10	43800478	-	0.124538	0.116775	0.00776295	0.0857431	0.0012118	0.174195	0.077172	0.0180584	0.15205	0.0710816	0.0161987	0	0.675793	119135	0	0
459658	cg12007420	chr12	6782601	-	0.978509	0.971958	0.00655131	0.00959324	0.00121202	0.99178	0.954358	0.00760188	0.987712	0.93663	0.00989436	0	0.675793	337125	0	0
173367	cg08073882	chr4	6202381	-	0.0164243	0.0194663	-0.00304206	-0.157204	0.00121393	0.0307325	0.00601329	0.00512812	0.0337789	0.0106554	0.00526786	0	0.675793	297273	0	0
534081	cg20664809	chr14	100848244	-	0.953159	0.960227	-0.00706746	-0.0105475	0.00121448	0.978303	0.889903	0.0156583	0.985096	0.925214	0.0121053	0	0.675793	322610	0	0
632135	cg19729649	chr17	79919727	+	0.066918	0.0579336	0.00898443	0.179196	0.00121475	0.138839	0.0331564	0.0217872	0.103463	0.0294821	0.0172753	0	0.675793	97540	0	0
255541	cg09502339	chr6	33152642	-	0.947302	0.935848	0.0114534	0.0173649	0.00121545	0.980953	0.851618	0.0222636	0.958718	0.832924	0.0232936	0	0.675793	251666	0	0
528961	cg10042132	chr14	81938575	-	0.943314	0.948023	-0.00470894	-0.00710871	0.00121895	0.967859	0.913867	0.0105081	0.969775	0.927146	0.0107985	0	0.675793	384323	0	0
521660	cg09403795	chr14	59895032	-	0.971989	0.976505	-0.00451612	-0.00661967	0.00121998	0.989076	0.950545	0.00789862	0.987022	0.963009	0.00646864	0	0.675793	395828	0	0
619351	cg16269236	chr17	53638963	+	0.960327	0.966939	-0.00661279	-0.00979863	0.00122289	0.980127	0.925629	0.00971077	0.982114	0.943577	0.0101822	0	0.675793	333832	0	0
368216	cg17598146	chr9	116038396	-	0.0129652	0.0119131	0.00105212	0.0676569	0.00122334	0.0247192	0.00632761	0.00342895	0.0172555	0.005841	0.00334446	0	0.675793	514471	0	0
438786	cg01460619	chr11	69453653	-	0.0219307	0.0252512	-0.0033205	-0.142728	0.00122492	0.0581938	0.00842973	0.00730279	0.0481086	0.0112647	0.00743069	0	0.675793	278668	0	0
428024	cg00792751	chr11	44979029	+	0.658077	0.618991	0.0390869	0.086977	0.00122591	0.846889	0.474125	0.0687413	0.789697	0.483226	0.0690874	0	0.675793	52641	0	0
309996	cg15320854	chr7	107300939	-	0.0477969	0.0443133	0.00348355	0.0896854	0.00122632	0.0828547	0.0273288	0.0110675	0.0683809	0.0286122	0.00939765	0	0.675793	268528	0	0
290151	cg16788137	chr7	8008242	+	0.00882536	0.0111399	-0.00231457	-0.167293	0.00122676	0.0199587	0.00233758	0.00315518	0.0180851	0.00515301	0.00378922	0	0.675793	355852	0	0
364244	cg13566278	chr9	95475470	-	0.947621	0.953344	-0.00572235	-0.00859529	0.00122779	0.972943	0.906818	0.0116893	0.971686	0.926548	0.0116001	0	0.675793	354187	0	0
29947	cg00647067	chr1	62218696	+	0.921938	0.910659	0.0112791	0.0175672	0.00122851	0.969524	0.848689	0.026625	0.953762	0.809823	0.0300144	0	0.675793	250116	0	0
449459	cg00142925	chr11	116706562	+	0.0323011	0.0270874	0.0052137	0.189766	0.00122869	0.0555619	0.0145866	0.00952937	0.0429984	0.0171773	0.00714155	0	0.675793	188215	0	0
111271	cg18943134	chr2	191564311	+	0.716294	0.688119	0.0281745	0.0570797	0.00122874	0.895319	0.454005	0.0748074	0.818607	0.40566	0.0789939	0	0.675793	100052	0	0
279685	cg02897383	chr6	158421499	-	0.963859	0.969049	-0.00518998	-0.00766813	0.00122882	0.984611	0.928067	0.0101484	0.987381	0.948282	0.00973628	0	0.675793	372277	0	0
563472	cg01045337	chr16	374988	+	0.0198812	0.0226748	-0.00279356	-0.128938	0.00122886	0.0309398	0.0105662	0.00462767	0.0305978	0.0146744	0.00390488	0	0.675793	315365	0	0
381129	cg19588538	chr10	5693331	+	0.936944	0.946805	-0.00986098	-0.0149458	0.00123096	0.964797	0.879711	0.0149615	0.969762	0.912379	0.0129972	0	0.675793	272264	0	0
405484	cg09459758	chr10	113683673	+	0.894533	0.882455	0.0120773	0.0193926	0.00123117	0.948573	0.837194	0.0233413	0.927883	0.806721	0.0325576	0	0.675793	237197	0	0
650606	cg26548187	chr19	3208840	+	0.878173	0.887604	-0.00943157	-0.0152393	0.0012324	0.924406	0.829573	0.0180593	0.927003	0.851615	0.0190988	0	0.675793	269520	0	0
597720	cg22356173	chr17	2614217	+	0.00518991	0.00628007	-0.00109016	-0.0999937	0.00123391	0.0122625	0.000792151	0.00233006	0.0182783	0.00247702	0.00324012	0	0.675793	508317	0	0
201246	cg02246916	chr5	960204	+	0.925489	0.930985	-0.00549596	-0.00845096	0.0012346	0.9528	0.893944	0.0142585	0.961107	0.90061	0.0144883	0	0.675793	356918	0	0
274164	cg26775598	chr6	134381863	-	0.868541	0.877658	-0.00911745	-0.0148951	0.00123543	0.938508	0.741834	0.0358202	0.9343	0.787234	0.0314575	0	0.675793	272676	0	0
707784	cg01419679	chr21	46294237	+	0.00770049	0.00885413	-0.00115364	-0.0910916	0.00123634	0.0143824	0.00321404	0.00219072	0.0172217	0.00410107	0.00291572	0	0.675793	497962	0	0
202470	cg00243313	chr5	1883413	-	0.0088799	0.00986572	-0.000985823	-0.0734302	0.00123738	0.019618	0.00383408	0.00289079	0.0153705	0.00413062	0.00261059	0	0.675793	525604	0	0
169758	cg24415922	chr4	858814	+	0.882658	0.89032	-0.0076621	-0.0123305	0.00124222	0.9193	0.853796	0.0139622	0.916068	0.87165	0.0115284	0	0.675793	299547	0	0
81264	cg09305261	chr2	37686130	+	0.89041	0.901786	-0.0113756	-0.0181126	0.00124263	0.936726	0.835916	0.0204315	0.943019	0.859846	0.0184252	0	0.675793	245991	0	0
519602	cg04403381	chr14	52029617	+	0.934826	0.939928	-0.00510178	-0.00776916	0.00124444	0.957298	0.910027	0.0102273	0.958361	0.916326	0.0118966	0	0.675793	370145	0	0
149023	cg01908177	chr3	113005203	+	0.949748	0.952844	-0.0030964	-0.00464702	0.00124802	0.970983	0.928053	0.00864657	0.972278	0.936277	0.00871634	0	0.675793	454030	0	0
63821	cg19709822	chr1	226186804	-	0.020485	0.0232029	-0.00271793	-0.123211	0.00125009	0.0314593	0.0105017	0.00453863	0.0342339	0.0128006	0.0055423	0	0.675793	321251	0	0
171451	cg03014027	chr4	2369183	+	0.955999	0.960445	-0.004446	-0.00662475	0.00125077	0.97967	0.923438	0.0109392	0.97627	0.938028	0.00948023	0	0.675793	395695	0	0
391146	cg03424285	chr10	60032152	-	0.969179	0.973133	-0.00395448	-0.00581469	0.00125157	0.984596	0.950115	0.00702712	0.983993	0.961868	0.00599819	0	0.675793	416846	0	0
639759	cg18993481	chr18	37333028	+	0.923534	0.932395	-0.00886141	-0.01363	0.00125196	0.954168	0.882783	0.0147585	0.956415	0.906222	0.0120684	0	0.675793	285134	0	0
421484	cg10284310	chr11	12108679	-	0.972131	0.97572	-0.00358884	-0.00526219	0.00125254	0.990416	0.949825	0.00783121	0.989688	0.96061	0.00828038	0	0.675793	433453	0	0
378778	cg06952288	chr10	465045	+	0.965594	0.967707	-0.0021131	-0.00312144	0.0012532	0.979619	0.946432	0.00647525	0.982961	0.951936	0.00734766	0	0.675793	517814	0	0
694259	cg01840850	chr20	49308210	+	0.0534248	0.0478047	0.00562012	0.133861	0.00125457	0.0840718	0.0282029	0.0114221	0.0734996	0.0322346	0.0109084	0	0.675793	174173	0	0
279847	cg01791189	chr6	158820684	-	0.955785	0.959597	-0.00381177	-0.00568284	0.00125457	0.975934	0.930534	0.00905415	0.98096	0.934626	0.0102577	0	0.675793	420680	0	0
587876	cg25378624	chr16	77796853	+	0.95664	0.961107	-0.004467	-0.00665157	0.0012546	0.979531	0.917085	0.0124713	0.983524	0.921912	0.0120181	0	0.675793	395002	0	0
459765	cg24679411	chr12	6876188	+	0.0238092	0.0278387	-0.00402946	-0.162445	0.00125544	0.0450834	0.00952291	0.00647995	0.0423611	0.011949	0.00717809	0	0.675793	238597	0	0
425664	cg12956209	chr11	32851240	-	0.00910029	0.00818988	0.000910414	0.0704588	0.00125547	0.0216945	0.00292492	0.00333765	0.014413	0.00204982	0.0031525	0	0.675793	538578	0	0
206651	cg19001554	chr5	31527598	+	0.741005	0.754603	-0.0135981	-0.0258886	0.00125703	0.827295	0.649393	0.0349386	0.825038	0.710093	0.0272302	0	0.675793	199950	0	0
594734	cg08672296	chr16	89632344	-	0.0259857	0.0242234	0.0017623	0.0724409	0.0012574	0.0437532	0.0132708	0.00616007	0.0361055	0.0123028	0.00613705	0	0.675793	414002	0	0
64346	cg02525420	chr1	227501894	-	0.943966	0.932375	0.0115908	0.0176363	0.00125747	0.974222	0.868482	0.0205358	0.972697	0.844311	0.0302012	0	0.675793	249601	0	0
161634	cg01292094	chr3	170693546	-	0.936166	0.942664	-0.00649718	-0.00987291	0.00125864	0.965976	0.88007	0.0151465	0.971198	0.898512	0.0147489	0	0.675793	332717	0	0
104467	cg26852477	chr2	155239151	-	0.933404	0.939868	-0.00646408	-0.00985144	0.00125948	0.964505	0.891967	0.0155878	0.970542	0.913695	0.0139964	0	0.675793	333010	0	0
435497	cg06610589	chr11	65407224	+	0.0490609	0.0438093	0.00525159	0.134348	0.00125975	0.148314	0.0214615	0.0184292	0.0761903	0.0229237	0.0130546	0	0.675793	186784	0	0
57367	cg26894354	chr1	203311314	-	0.322245	0.314532	0.00771348	0.0338888	0.00126155	0.440363	0.174592	0.0537377	0.404429	0.189012	0.0461641	0	0.675793	165968	0	0
684887	cg14175979	chr20	21137039	+	0.958281	0.961749	-0.00346808	-0.00515806	0.00126512	0.979561	0.929588	0.0103306	0.977497	0.944575	0.00923356	0	0.675793	436678	0	0
420853	cg17975060	chr11	10380331	-	0.98066	0.983303	-0.00264331	-0.00384431	0.00126594	0.993281	0.96376	0.00620139	0.992308	0.963842	0.00628744	0	0.675793	484808	0	0
247445	cg11259833	chr6	28249221	-	0.0189278	0.0148821	0.00404568	0.217347	0.00126622	0.0521474	0.00320618	0.00805931	0.035903	0.00296122	0.00890557	0	0.675793	237750	0	0
467341	cg22856264	chr12	48122937	-	0.935498	0.941832	-0.00633442	-0.00963319	0.00126747	0.963143	0.893031	0.0132541	0.966564	0.91978	0.0100142	0	0.675793	336475	0	0
96026	cg15434912	chr2	105879997	-	0.907755	0.913383	-0.0056272	-0.00881884	0.00126767	0.94057	0.875714	0.0142171	0.943762	0.88553	0.0142505	0	0.675793	350202	0	0
23863	cg04968642	chr1	43784977	-	0.956196	0.958747	-0.00255167	-0.00380506	0.00126974	0.972247	0.941265	0.00708352	0.971452	0.945955	0.0072396	0	0.675793	486468	0	0
449435	cg09136129	chr11	116692084	-	0.877212	0.88754	-0.0103285	-0.0166981	0.00127084	0.929327	0.799178	0.0273853	0.929341	0.815205	0.0240734	0	0.675793	256844	0	0
522380	cg00133556	chr14	62005843	+	0.961862	0.965448	-0.00358621	-0.00531381	0.00127598	0.981335	0.943453	0.00815593	0.977688	0.951842	0.00740195	0	0.675793	431827	0	0
92547	cg18109106	chr2	86850866	+	0.00985843	0.011331	-0.00147261	-0.103203	0.00127869	0.0207458	0.00218059	0.00427644	0.0190518	0.00461336	0.00374301	0	0.675793	450925	0	0
94980	cg07953209	chr2	101619020	-	0.0117598	0.0151337	-0.00337389	-0.207957	0.00127998	0.0235632	0.00149718	0.00474412	0.039146	0.00457034	0.0059402	0	0.675793	275230	0	0
134274	cg24867653	chr3	38306594	-	0.930255	0.937645	-0.00738963	-0.0112941	0.00128041	0.970482	0.843704	0.023673	0.969777	0.86543	0.0203569	0	0.675793	312389	0	0
505654	cg02494440	chr13	86172218	-	0.890316	0.902312	-0.0119961	-0.019096	0.00128151	0.944606	0.820624	0.0288163	0.939588	0.828276	0.0249025	0	0.675793	239236	0	0
104027	cg14956176	chr2	152324251	-	0.90294	0.914941	-0.0120008	-0.018841	0.00128152	0.95215	0.820095	0.0281055	0.956157	0.863487	0.0227653	0	0.675793	240918	0	0
175548	cg03350736	chr4	11410342	-	0.857553	0.869432	-0.0118786	-0.0196195	0.00128362	0.927532	0.693521	0.0367712	0.925972	0.783206	0.0348973	0	0.675793	235689	0	0
218686	cg07905018	chr5	102990237	-	0.966195	0.970452	-0.00425711	-0.0062778	0.0012839	0.980834	0.946743	0.00785495	0.986564	0.950557	0.00718762	0	0.675793	404450	0	0
671706	cg14522236	chr19	46905998	-	0.708452	0.647225	0.0612267	0.128504	0.00128522	0.869245	0.507124	0.0943605	0.832222	0.476071	0.0971076	0	0.675793	21480	0	0
333275	cg16095262	chr8	37963188	+	0.0202169	0.0217165	-0.00149959	-0.0698773	0.00128719	0.031543	0.0107476	0.00446884	0.0313843	0.0136123	0.00469314	0	0.675793	447221	0	0
713882	cg06223477	chr22	29663662	+	0.0504722	0.0468555	0.00361665	0.0889711	0.00128793	0.0733892	0.0306758	0.00826226	0.0639266	0.0278414	0.00863627	0	0.675793	260703	0	0
329220	cg05698069	chr8	22436246	+	0.058975	0.0534539	0.00552109	0.120364	0.00128827	0.0921506	0.0351543	0.0104751	0.0736061	0.036069	0.00986505	0	0.675793	177448	0	0
704140	cg09316688	chr21	38444692	-	0.0171544	0.0160797	0.00107466	0.0582565	0.00128832	0.0274901	0.00991001	0.00375134	0.0240676	0.0103131	0.00364033	0	0.675793	510777	0	0
566435	cg07312485	chr16	2052423	-	0.949592	0.954618	-0.00502552	-0.00753589	0.00128913	0.970353	0.909904	0.0102254	0.972429	0.936894	0.00866824	0	0.675793	375091	0	0
274834	cg04159666	chr6	136949971	+	0.968481	0.973204	-0.00472283	-0.00694669	0.00128921	0.989545	0.937388	0.0107144	0.989821	0.950349	0.0104419	0	0.675793	388022	0	0
489085	cg15842285	chr12	122288010	-	0.917198	0.928878	-0.01168	-0.0180602	0.00128921	0.959312	0.867583	0.0210986	0.965662	0.87539	0.0179151	0	0.675793	246386	0	0
25399	cg12800095	chr1	46594087	+	0.837495	0.843976	-0.00648111	-0.0109909	0.00129025	0.872832	0.801465	0.0155701	0.878679	0.808289	0.0176233	0	0.675793	316409	0	0
644545	cg17388924	chr18	67714404	-	0.854625	0.86832	-0.0136948	-0.0226718	0.0012905	0.906636	0.795576	0.023772	0.907246	0.830071	0.0219713	0	0.675793	216969	0	0
331919	cg06246552	chr8	29952761	-	0.0289621	0.0356615	-0.00669936	-0.228906	0.00129162	0.0697806	0.00365426	0.0133153	0.0850123	0.0172714	0.0150836	0	0.675793	143145	0	0
208367	cg00090632	chr5	38600962	+	0.773079	0.81259	-0.0395117	-0.071017	0.00129191	0.886271	0.62299	0.0530621	0.876374	0.737581	0.0375307	0	0.675793	74511	0	0
562095	cg26287546	chr15	99972595	+	0.910915	0.918686	-0.00777148	-0.0121236	0.00129295	0.952173	0.824872	0.0236309	0.949468	0.864149	0.0214211	0	0.675793	302024	0	0
713576	cg21417381	chr22	28439745	+	0.896598	0.903715	-0.00711673	-0.0112808	0.00129452	0.946209	0.812141	0.0233559	0.951782	0.846051	0.0250385	0	0.675793	312536	0	0
25564	cg06741803	chr1	46807522	-	0.89605	0.901751	-0.00570097	-0.00904917	0.00129643	0.931119	0.854912	0.0176467	0.937886	0.867116	0.0169974	0	0.675793	346210	0	0
456268	cg14194253	chr11	134340440	-	0.92509	0.930255	-0.00516575	-0.007948	0.00129654	0.956863	0.853632	0.016901	0.949948	0.869529	0.0158842	0	0.675793	366494	0	0
561112	cg07009968	chr15	96537958	-	0.684645	0.698392	-0.0137468	-0.0282717	0.00129866	0.765989	0.54236	0.040042	0.762404	0.596032	0.04166	0	0.675793	188875	0	0
153108	cg13587665	chr3	128154244	-	0.947576	0.95223	-0.00465439	-0.00699537	0.00129928	0.968282	0.918166	0.00991582	0.971404	0.936987	0.00925829	0	0.675793	386926	0	0
688615	cg08532724	chr20	34690295	-	0.982726	0.984536	-0.0018104	-0.00262859	0.00130101	0.991942	0.966606	0.00446779	0.991085	0.97227	0.00452145	0	0.675793	543385	0	0
298815	cg26672672	chr7	47479433	-	0.911664	0.917531	-0.00586742	-0.00915526	0.00130194	0.94382	0.860807	0.0164835	0.946857	0.889406	0.0141595	0	0.675793	344354	0	0
596705	cg18121601	chr17	1462838	-	0.933049	0.937657	-0.00460838	-0.00703282	0.001302	0.956265	0.905109	0.0101583	0.958515	0.915381	0.0105953	0	0.675793	386039	0	0
553200	cg02866536	chr15	72920773	+	0.891789	0.899495	-0.00770584	-0.0122755	0.00130247	0.944011	0.838444	0.0243607	0.943709	0.858916	0.0225322	0	0.675793	300197	0	0
38154	cg03910767	chr1	110626977	-	0.0105381	0.0120081	-0.00146998	-0.0997304	0.00130294	0.0185522	0.0056934	0.00248096	0.0192506	0.0063983	0.00310414	0	0.675793	451255	0	0
198434	cg13111356	chr4	184244476	-	0.822988	0.839165	-0.0161773	-0.0277497	0.00130442	0.897001	0.689147	0.0427742	0.905758	0.746747	0.0313459	0	0.675793	191247	0	0
689951	cg00689316	chr20	37300418	-	0.151471	0.131667	0.0198041	0.188773	0.00130528	0.341216	0.0720951	0.0660976	0.256837	0.053965	0.0509242	0	0.675793	21007	0	0
362907	cg10823546	chr9	88555702	-	0.00834426	0.00985024	-0.00150598	-0.113828	0.00130593	0.0245247	0.00164024	0.00353274	0.0240286	0.00291509	0.00455748	0	0.675793	446373	0	0
96257	cg23881672	chr2	106468075	+	0.911542	0.916794	-0.00525269	-0.00819986	0.00130615	0.941799	0.885138	0.0118381	0.942409	0.887179	0.0125793	0	0.675793	361619	0	0
581825	cg24816868	chr16	57980866	-	0.855997	0.871146	-0.0151493	-0.0250196	0.00130756	0.925467	0.691434	0.0384609	0.944383	0.788567	0.0283494	0	0.675793	204382	0	0
405912	cg18683103	chr10	115015742	-	0.951073	0.952613	-0.00154014	-0.0023101	0.00130828	0.974276	0.890236	0.0151292	0.972641	0.924864	0.0122628	0	0.675793	561437	0	0
422304	cg16802027	chr11	14913860	+	0.0711274	0.0684152	0.00271221	0.0490561	0.00130845	0.0956604	0.0413241	0.0107502	0.0838123	0.0413798	0.0103278	0	0.675793	321693	0	0
40893	cg25340966	chr1	119532195	-	0.0523081	0.0478995	0.00440854	0.105867	0.00130911	0.0974281	0.0245277	0.0119201	0.0678016	0.0300028	0.0102526	0	0.675793	220610	0	0
405224	cg25605792	chr10	112326929	-	0.0118798	0.0149622	-0.00308238	-0.190144	0.00130928	0.026062	0.00439975	0.00392774	0.025461	0.00619077	0.00499614	0	0.675793	294488	0	0
81988	cg01058454	chr2	39774748	+	0.955384	0.958727	-0.003343	-0.00498724	0.00131057	0.981067	0.924226	0.0106757	0.981061	0.941066	0.0106403	0	0.675793	442350	0	0
685357	cg15277173	chr20	23081084	-	0.946794	0.950093	-0.00329858	-0.00496518	0.00131164	0.971026	0.914903	0.0123194	0.971397	0.919384	0.0112245	0	0.675793	443088	0	0
271405	cg23357830	chr6	116609276	-	0.968886	0.963479	0.00540708	0.00799111	0.00131225	0.983924	0.942059	0.00864417	0.978495	0.945957	0.00857557	0	0.675793	365707	0	0
619823	cg03679398	chr17	55398854	+	0.961301	0.964566	-0.00326543	-0.00484208	0.00131239	0.979112	0.939765	0.00845432	0.978865	0.944977	0.00846124	0	0.675793	447136	0	0
491991	cg14750341	chr12	129691759	+	0.69001	0.696487	-0.00647662	-0.0132867	0.00131251	0.782523	0.566202	0.0403899	0.782833	0.635469	0.0320718	0	0.675793	288831	0	0
379357	cg06233823	chr10	1142583	+	0.879728	0.889712	-0.00998311	-0.0160975	0.00131323	0.922051	0.840098	0.0192917	0.920136	0.860095	0.0158524	0	0.675793	261951	0	0
101947	cg00550747	chr2	135206371	+	0.929135	0.934647	-0.00551213	-0.00844296	0.00131409	0.952648	0.8959	0.0127251	0.956755	0.908721	0.0122122	0	0.675793	357070	0	0
93324	cg19561274	chr2	96905601	-	0.954879	0.959691	-0.00481178	-0.00717673	0.00131433	0.97375	0.933163	0.00942631	0.978049	0.934578	0.0108074	0	0.675793	382782	0	0
301292	cg11916753	chr7	69161398	+	0.0509048	0.0510346	-0.000129846	-0.00307249	0.00131701	0.109541	0.0234138	0.0177558	0.117836	0.0244191	0.017868	0	0.675793	696219	0	0
676656	cg19717326	chr19	54370016	+	0.777307	0.755365	0.0219415	0.0407775	0.00131888	0.910161	0.610974	0.0513599	0.869111	0.615513	0.0584002	0	0.675793	142519	0	0
224150	cg07274716	chr5	134363973	+	0.125895	0.109553	0.0163418	0.184839	0.00132269	0.311069	0.0481572	0.0507464	0.184217	0.062165	0.0317638	0	0.675793	33134	0	0
367185	cg14325779	chr9	111230512	-	0.92983	0.937631	-0.00780181	-0.0119268	0.00132377	0.964401	0.883217	0.016112	0.971235	0.90158	0.0165997	0	0.675793	304397	0	0
513997	cg03989416	chr14	22467853	-	0.957613	0.96096	-0.00334618	-0.0049805	0.00132549	0.978808	0.916624	0.0122317	0.9839	0.919589	0.0131377	0	0.675793	442580	0	0
268321	cg08875094	chr6	100016130	-	0.0907645	0.0836049	0.00715966	0.106332	0.00132632	0.12406	0.054023	0.0144563	0.121134	0.0488952	0.015781	0	0.675793	132112	0	0
104489	cg09085888	chr2	155446887	-	0.941334	0.947223	-0.00588856	-0.00890246	0.00132761	0.963708	0.903731	0.0103954	0.964828	0.928391	0.0084996	0	0.675793	348764	0	0
444165	cg23555155	chr11	86142104	+	0.931036	0.913745	0.0172908	0.0267549	0.00133049	0.980335	0.755083	0.0396555	0.96393	0.802906	0.0483058	0	0.675793	195832	0	0
546430	cg20307368	chr15	52040296	+	0.837807	0.82138	0.0164272	0.0282282	0.0013312	0.906824	0.742088	0.0328981	0.872119	0.747099	0.0324792	0	0.675793	189096	0	0
605274	cg22027305	chr17	18759561	-	0.00954428	0.0112441	-0.0016998	-0.120314	0.00133131	0.0165896	0.00417638	0.00263284	0.0179822	0.00607098	0.00284345	0	0.675793	421609	0	0
354126	cg23170280	chr8	144568483	+	0.970037	0.973888	-0.0038508	-0.00565759	0.00133148	0.987619	0.931636	0.00939148	0.990766	0.95933	0.00819631	0	0.675793	421442	0	0
353221	cg01288167	chr8	143535437	-	0.922491	0.929662	-0.00717127	-0.0110525	0.00133341	0.960964	0.867459	0.017696	0.962349	0.891936	0.0166718	0	0.675793	315617	0	0
78862	cg06720879	chr2	27486316	+	0.0203581	0.0235739	-0.00321584	-0.14526	0.00133776	0.0512291	0.0070906	0.00803084	0.0401431	0.0110279	0.00712498	0	0.675793	285373	0	0
252531	cg24932925	chr6	31708299	-	0.0314616	0.0283189	0.00314272	0.11372	0.00134062	0.0553376	0.0146366	0.00715385	0.043076	0.0124971	0.00660534	0	0.675793	290346	0	0
619738	cg02865193	chr17	55183945	-	0.792328	0.802905	-0.0105765	-0.0188938	0.00134479	0.852888	0.709121	0.0339867	0.866007	0.708233	0.0378683	0	0.675793	240567	0	0
406657	cg13286985	chr10	118230768	+	0.847911	0.86146	-0.0135496	-0.0226075	0.00134517	0.917334	0.741906	0.0339574	0.919668	0.819009	0.0293697	0	0.675793	217339	0	0
530285	cg25014412	chr14	91247332	-	0.969441	0.972868	-0.00342731	-0.00503954	0.00134519	0.983449	0.953363	0.00626279	0.986561	0.958423	0.00622399	0	0.675793	440584	0	0
250548	cg22967205	chr6	30675571	-	0.958998	0.962027	-0.00302924	-0.00450305	0.00134646	0.974333	0.93812	0.00775046	0.974224	0.936731	0.00788667	0	0.675793	459161	0	0
535078	cg21059392	chr14	101922750	+	0.724225	0.747213	-0.0229875	-0.044476	0.00135032	0.889421	0.510275	0.080782	0.88819	0.621115	0.0723198	0	0.675793	131540	0	0
256976	cg09092446	chr6	33827013	+	0.95406	0.956076	-0.00201568	-0.00301327	0.00135066	0.97409	0.919476	0.00918435	0.973483	0.93973	0.00892678	0	0.675793	523113	0	0
700214	cg06053407	chr20	62852752	-	0.836754	0.845582	-0.00882795	-0.0149631	0.00135075	0.90268	0.725848	0.0356036	0.910609	0.762668	0.0386157	0	0.675793	272109	0	0
584689	cg09104050	chr16	68563912	-	0.132369	0.125588	0.00678008	0.070396	0.00135165	0.165252	0.0807904	0.0183412	0.156018	0.0765784	0.0176785	0	0.675793	141174	0	0
212398	cg02219956	chr5	65836561	-	0.943016	0.949563	-0.00654707	-0.0098772	0.00135331	0.977559	0.887753	0.0185507	0.977272	0.907826	0.0159044	0	0.675793	332653	0	0
362111	cg17411747	chr9	80111481	+	0.967444	0.972638	-0.00519363	-0.00764544	0.00135373	0.981794	0.938227	0.00771186	0.986974	0.957733	0.00758048	0	0.675793	372779	0	0
422582	cg25842524	chr11	16144910	+	0.922246	0.928965	-0.00671932	-0.0103612	0.00135399	0.964724	0.866487	0.0201404	0.96032	0.892959	0.0179824	0	0.675793	325285	0	0
539619	cg07264079	chr15	26375655	-	0.282367	0.337794	-0.0554273	-0.250454	0.00135426	0.648782	0.0824162	0.105595	0.682764	0.190305	0.115986	0	0.675793	1982	0	0
700098	cg24513045	chr20	62711519	-	0.0316698	0.0311555	0.000514283	0.0179163	0.00135482	0.043456	0.0226205	0.00484983	0.0443168	0.0228634	0.00542259	0	0.675793	613821	0	0
573377	cg00652027	chr16	21311968	-	0.0110093	0.0136437	-0.00263443	-0.17043	0.00135491	0.0227701	0.00267166	0.00402298	0.0236922	0.00474963	0.00534976	0	0.675793	327970	0	0
314909	cg10731606	chr7	134671120	+	0.0685216	0.0636291	0.00489246	0.0928128	0.00135576	0.0978333	0.0444604	0.0128179	0.0850145	0.0367965	0.0116783	0	0.675793	200304	0	0
413499	cg07505629	chr10	134929753	+	0.877492	0.852754	0.0247382	0.0407852	0.00135606	0.946124	0.626243	0.0589748	0.938728	0.668328	0.0693279	0	0.675793	142489	0	0
218753	cg08923392	chr5	104955557	-	0.932587	0.938533	-0.00594636	-0.00907273	0.00135622	0.965269	0.889802	0.0149698	0.958221	0.909662	0.0132809	0	0.675793	345751	0	0
179431	cg23681495	chr4	40982188	+	0.804122	0.817055	-0.0129328	-0.0227378	0.00135651	0.875109	0.743635	0.0297471	0.89908	0.747946	0.0348874	0	0.675793	216611	0	0
230810	cg02842704	chr5	151305746	-	0.753426	0.697003	0.0564228	0.110771	0.00135661	0.879054	0.573465	0.0675937	0.808803	0.491727	0.0829535	0	0.675793	31297	0	0
57409	cg00602880	chr1	203421233	-	0.449336	0.420924	0.0284117	0.0921155	0.00135734	0.557691	0.300526	0.0519648	0.531195	0.269473	0.0599273	0	0.675793	47124	0	0
185733	cg00234613	chr4	87418006	-	0.961653	0.965626	-0.00397331	-0.00588747	0.00135836	0.980778	0.919727	0.0112448	0.984033	0.940764	0.0102046	0	0.675793	414844	0	0
5229	cg26250989	chr1	6333502	-	0.902927	0.910835	-0.00790799	-0.0124431	0.00135839	0.933642	0.860498	0.0166557	0.934812	0.876617	0.013652	0	0.675793	298261	0	0
474874	cg01826959	chr12	64238607	+	0.0185252	0.0205246	-0.00199939	-0.097735	0.00135977	0.0329277	0.0103834	0.00432807	0.0283065	0.0115974	0.00424331	0	0.675793	387262	0	0
150243	cg13498035	chr3	120067095	+	0.0143441	0.0161832	-0.00183911	-0.10507	0.00135987	0.023372	0.00626121	0.00385419	0.0255061	0.00864045	0.00450096	0	0.675793	404967	0	0
194600	cg25941544	chr4	154176911	-	0.981528	0.977969	0.00355906	0.00518782	0.00136071	0.992802	0.963032	0.00571693	0.988795	0.956065	0.0077632	0	0.675793	435762	0	0
351698	cg09149160	chr8	141195525	-	0.944812	0.94918	-0.0043672	-0.00658367	0.00136278	0.967189	0.915459	0.0104871	0.968402	0.933043	0.00909307	0	0.675793	396725	0	0
263137	cg07418892	chr6	52150456	-	0.886444	0.897404	-0.0109604	-0.0175322	0.00136344	0.967305	0.722835	0.0471379	0.961454	0.72082	0.0452204	0	0.675793	250375	0	0
52493	cg25269569	chr1	179560133	-	0.96375	0.967025	-0.00327541	-0.00484467	0.00136376	0.982456	0.930246	0.0100645	0.979497	0.944345	0.00880106	0	0.675793	447051	0	0
336009	cg00598259	chr8	53206831	+	0.929327	0.914124	0.0152026	0.0235404	0.00136427	0.966501	0.881702	0.0202137	0.951295	0.837166	0.0253163	0	0.675793	212098	0	0
173422	cg22247194	chr4	6271904	-	0.042979	0.0520853	-0.00910631	-0.228831	0.00136483	0.157023	0.00442421	0.026537	0.147796	0.0106445	0.0295742	0	0.675793	95641	0	0
157882	cg06800962	chr3	149096029	-	0.20773	0.185235	0.0224945	0.157325	0.00136489	0.39091	0.0826096	0.0628909	0.372539	0.069543	0.0691614	0	0.675793	15080	0	0
719810	cg26538749	chr22	42135388	-	0.908566	0.922761	-0.0141956	-0.022125	0.00136522	0.94679	0.83142	0.0213567	0.955808	0.877563	0.0189498	0	0.675793	220151	0	0
664390	cg14477047	chr19	35050450	-	0.930287	0.935587	-0.00530004	-0.00810909	0.00136573	0.964098	0.849073	0.017222	0.962358	0.909761	0.0175714	0	0.675793	363329	0	0
204627	cg11212594	chr5	10518495	-	0.978295	0.974571	0.00372398	0.00544646	0.00136665	0.9896	0.962614	0.00625189	0.984444	0.955749	0.00664515	0	0.675793	427755	0	0
543856	cg17172170	chr15	42386729	+	0.959986	0.963602	-0.00361609	-0.00536835	0.00136794	0.97861	0.930042	0.00925948	0.976831	0.947802	0.0081511	0	0.675793	430107	0	0
251104	cg00119460	chr6	30923743	-	0.0281351	0.0252495	0.00288561	0.113517	0.00136914	0.0540782	0.0134902	0.00797356	0.038483	0.0132716	0.00627382	0	0.675793	308388	0	0
700682	cg27019609	chr21	18811027	+	0.597348	0.565278	0.0320696	0.0782631	0.00136949	0.724261	0.433827	0.0595931	0.665425	0.391723	0.0629243	0	0.675793	63646	0	0
720637	cg26722055	chr22	43474612	-	0.896747	0.9143	-0.0175535	-0.0276619	0.00136989	0.948317	0.787863	0.0314103	0.960514	0.871946	0.0207351	0	0.675793	191628	0	0
113952	cg18626478	chr2	205591269	-	0.860455	0.833903	0.0265519	0.0446924	0.00137003	0.963307	0.710603	0.0548672	0.933231	0.730854	0.0509195	0	0.675793	130933	0	0
148691	cg10777851	chr3	112051808	+	0.0346179	0.0376853	-0.00306741	-0.0959224	0.00137123	0.0679082	0.0155689	0.00969905	0.0627636	0.0226602	0.00968281	0	0.675793	295510	0	0
544481	cg09106471	chr15	44036757	+	0.961993	0.966103	-0.00410983	-0.00608721	0.00137146	0.979265	0.9363	0.00812342	0.981544	0.946359	0.0086174	0	0.675793	409450	0	0
160187	cg20712415	chr3	159570903	+	0.332701	0.319879	0.0128221	0.0550137	0.00137452	0.500839	0.244666	0.0451159	0.44639	0.257396	0.0436455	0	0.675793	104576	0	0
262074	cg04812891	chr6	45545177	-	0.950828	0.954877	-0.00404895	-0.00606678	0.00137486	0.972116	0.926883	0.00941817	0.974493	0.934629	0.0108741	0	0.675793	409987	0	0
620254	cg15547413	chr17	56301725	+	0.636692	0.684145	-0.0474532	-0.102159	0.00137508	0.805401	0.368426	0.0944607	0.89759	0.48841	0.102153	0	0.675793	37782	0	0
632542	cg21034531	chr17	80197757	+	0.903936	0.914439	-0.010503	-0.0164849	0.00137598	0.944156	0.85709	0.0206926	0.942779	0.884147	0.0148281	0	0.675793	258654	0	0
497921	cg07609031	chr13	30277153	-	0.206539	0.200465	0.00607409	0.0410471	0.00137661	0.465462	0.0952162	0.0675113	0.363926	0.0754136	0.0594678	0	0.675793	160255	0	0
82253	cg09189355	chr2	42103227	-	0.920856	0.928308	-0.00745135	-0.0115026	0.00137709	0.95344	0.882387	0.0153705	0.95285	0.906405	0.0122086	0	0.675793	309643	0	0
191900	cg26957855	chr4	139859157	-	0.784693	0.743223	0.0414697	0.07732	0.00137784	0.91908	0.585964	0.0664799	0.852312	0.622594	0.0637759	0	0.675793	64918	0	0
306680	cg27471904	chr7	98693972	-	0.939702	0.944518	-0.00481558	-0.00729688	0.00137845	0.9712	0.894964	0.0145092	0.974675	0.9142	0.0150968	0	0.675793	380204	0	0
670462	cg26190885	chr19	45409005	+	0.0562196	0.0505099	0.00570975	0.130088	0.00137853	0.0911896	0.0380962	0.00924103	0.0707568	0.0370797	0.00781655	0	0.675793	171297	0	0
723126	cg27310267	chr22	48445267	-	0.867619	0.878604	-0.010985	-0.0179459	0.00137941	0.93706	0.80887	0.028518	0.934035	0.805366	0.0284025	0	0.675793	247261	0	0
717340	cg23996325	chr22	38038349	+	0.794223	0.788255	0.00596775	0.0107455	0.00138027	0.858462	0.732655	0.0245316	0.828284	0.724576	0.0261095	0	0.675793	319828	0	0
708974	cg19139193	chr21	47820729	+	0.938382	0.941353	-0.00297102	-0.0045125	0.00138123	0.963886	0.896625	0.0109386	0.96053	0.911145	0.0112625	0	0.675793	458806	0	0
223905	cg23194711	chr5	133859471	-	0.928726	0.931816	-0.00309004	-0.00474118	0.00138353	0.961731	0.870701	0.0191076	0.959218	0.905242	0.0146701	0	0.675793	450635	0	0
677841	cg19947904	chr19	55955289	+	0.0212508	0.0240614	-0.00281064	-0.124246	0.00138651	0.0376491	0.00982525	0.00595949	0.035475	0.0136703	0.00563034	0	0.675793	314055	0	0
545009	cg19006841	chr15	45491101	-	0.00941295	0.0116126	-0.00219966	-0.154854	0.00138704	0.0216529	0.00126791	0.00399348	0.0266032	0.00347254	0.00518058	0	0.675793	366929	0	0
95213	cg13986486	chr2	102295986	-	0.94264	0.947491	-0.00485101	-0.00732781	0.00138753	0.978759	0.852878	0.016128	0.974872	0.92075	0.0130305	0	0.675793	379505	0	0
259553	cg26748297	chr6	40346044	+	0.904589	0.910235	-0.00564641	-0.0088794	0.00138754	0.949191	0.853347	0.0190452	0.938702	0.874805	0.0162866	0	0.675793	349179	0	0
546365	cg03694569	chr15	51871434	-	0.972046	0.969228	0.00281778	0.00414547	0.00138795	0.982614	0.957691	0.00549218	0.977501	0.957577	0.00503021	0	0.675793	472566	0	0
232045	cg16793592	chr5	158407204	-	0.544468	0.495638	0.0488297	0.132999	0.00139213	0.819201	0.28413	0.104362	0.681796	0.251824	0.100752	0	0.675793	19640	0	0
458423	cg11416012	chr12	4380899	-	0.103617	0.109833	-0.00621596	-0.0768463	0.00139216	0.158335	0.0590384	0.0247571	0.216789	0.0547486	0.0316165	0	0.675793	156109	0	0
113481	cg09043926	chr2	203044720	-	0.959525	0.964409	-0.0048842	-0.00724966	0.00139299	0.980422	0.93801	0.00924896	0.982243	0.939993	0.00952483	0	0.675793	381210	0	0
135112	cg22988851	chr3	41752483	+	0.889666	0.898088	-0.00842193	-0.0134425	0.00139312	0.932599	0.84886	0.0157858	0.941598	0.866242	0.0182973	0	0.675793	287113	0	0
584318	cg06866814	chr16	68027297	+	0.0115107	0.0128106	-0.0012999	-0.0846501	0.00139429	0.0252676	0.00309796	0.00449934	0.0238621	0.00605562	0.00378133	0	0.675793	475303	0	0
197114	cg14771997	chr4	174265120	+	0.960382	0.964402	-0.00402017	-0.00596455	0.00139475	0.979725	0.928058	0.00885368	0.975723	0.949405	0.0072366	0	0.675793	412718	0	0
577795	cg00106591	chr16	34209017	+	0.867549	0.83512	0.0324284	0.0543225	0.00139489	0.948793	0.714265	0.0525215	0.941376	0.69622	0.065753	0	0.675793	106180	0	0
110672	cg01955377	chr2	188392251	-	0.884793	0.86309	0.0217027	0.0354231	0.0013954	0.956697	0.61572	0.0512931	0.940659	0.610931	0.0641886	0	0.675793	160324	0	0
321935	cg27611274	chr7	157512892	+	0.972266	0.974073	-0.00180678	-0.00265125	0.00139582	0.985415	0.951428	0.00712155	0.988534	0.961034	0.00726856	0	0.675793	542191	0	0
449892	cg08022044	chr11	117595028	-	0.915671	0.924171	-0.00850036	-0.0131877	0.00139586	0.951419	0.871527	0.0152753	0.947337	0.885512	0.0152809	0	0.675793	289905	0	0
257365	cg04025110	chr6	34407017	-	0.888583	0.897865	-0.00928277	-0.0148272	0.00139615	0.939379	0.811176	0.0230473	0.933666	0.853513	0.0188014	0	0.675793	273288	0	0
675117	cg08678044	chr19	51226849	-	0.166719	0.139924	0.0267949	0.237224	0.0013962	0.393907	0.0450138	0.0734796	0.303182	0.0513869	0.0593899	0	0.675793	9180	0	0
630467	cg04163696	chr17	78877971	+	0.942295	0.946707	-0.00441162	-0.00666803	0.00139661	0.958817	0.922141	0.00778017	0.961202	0.93326	0.00773106	0	0.675793	394602	0	0
386482	cg05705492	chr10	28955341	-	0.784414	0.803106	-0.0186921	-0.0335527	0.00139897	0.871036	0.665682	0.0369818	0.885401	0.693733	0.0387066	0	0.675793	167273	0	0
466954	cg17713673	chr12	46466053	+	0.121063	0.1105	0.0105624	0.12122	0.00139956	0.214594	0.0691915	0.0276402	0.173675	0.0687094	0.0251651	0	0.675793	75984	0	0
619282	cg07712000	chr17	53396083	-	0.94707	0.952052	-0.00498169	-0.00748997	0.00140009	0.969158	0.922536	0.010371	0.972658	0.930197	0.0112417	0	0.675793	376028	0	0
223126	cg05972502	chr5	132073061	+	0.0400256	0.0376456	0.00237999	0.0703234	0.0014001	0.0615658	0.0221257	0.00706841	0.0555255	0.0217078	0.00692073	0	0.675793	349727	0	0
148374	cg00705142	chr3	110789788	+	0.0180668	0.0204163	-0.0023495	-0.11598	0.00140139	0.0383767	0.00953928	0.00476666	0.0349991	0.0128334	0.00477634	0	0.675793	352532	0	0
118743	cg20343375	chr2	224866411	+	0.970927	0.972724	-0.00179681	-0.00264024	0.00140161	0.984544	0.953879	0.00694001	0.983381	0.956528	0.0070521	0	0.675793	542773	0	0
18082	cg06973225	chr1	31343737	+	0.898441	0.906567	-0.00812594	-0.0128474	0.00140209	0.941734	0.82997	0.0228541	0.942925	0.861976	0.0210579	0	0.675793	293700	0	0
268815	cg15317722	chr6	105418093	+	0.871307	0.840488	0.0308181	0.0513523	0.00140213	0.942323	0.738246	0.0402689	0.926821	0.715142	0.0519421	0	0.675793	113256	0	0
169755	cg17445101	chr4	854688	-	0.948067	0.951063	-0.00299552	-0.00450374	0.00140285	0.967971	0.922684	0.00920406	0.969824	0.930096	0.00822577	0	0.675793	459134	0	0
664083	cg11706865	chr19	34122807	+	0.608883	0.576618	0.0322651	0.0772455	0.00140356	0.737649	0.445869	0.072178	0.727362	0.338685	0.079876	0	0.675793	65031	0	0
595110	cg00800038	chr16	89945340	+	0.973671	0.975957	-0.00228567	-0.00334838	0.00140486	0.988139	0.95708	0.0061317	0.989858	0.963314	0.00664531	0	0.675793	506933	0	0
66879	cg09753291	chr1	234462425	+	0.0347361	0.0520125	-0.0172764	-0.471119	0.00140499	0.0967726	0.010387	0.0169071	0.169549	0.0164846	0.0393293	0	0.675793	29232	0	0
97748	cg03338835	chr2	113479649	-	0.950158	0.954707	-0.00454863	-0.00681845	0.00140601	0.967646	0.928313	0.0102122	0.967958	0.938049	0.00743501	0	0.675793	391007	0	0
451684	cg27438880	chr11	120393931	-	0.479726	0.442326	0.0374009	0.114614	0.00140662	0.665389	0.294056	0.0735945	0.558441	0.271359	0.0730488	0	0.675793	28825	0	0
251053	cg26672776	chr6	30899568	-	0.578353	0.63191	-0.0535565	-0.125688	0.00140674	0.767569	0.274551	0.115211	0.783311	0.409823	0.0907363	0	0.675793	22846	0	0
122018	cg01080600	chr2	236443773	-	0.901323	0.912464	-0.0111406	-0.0175296	0.00140683	0.937261	0.849035	0.0171241	0.938564	0.874986	0.0143729	0	0.675793	250395	0	0
607974	cg24134016	chr17	28837420	+	0.989852	0.991653	-0.00180073	-0.00259596	0.00140687	0.996902	0.981039	0.00348234	0.997402	0.984829	0.00329998	0	0.675793	545191	0	0
593517	cg00816037	chr16	88812342	+	0.0486466	0.0463114	0.00233517	0.0586198	0.00140926	0.0990362	0.0241072	0.0166204	0.111934	0.0201549	0.0212029	0	0.675793	353948	0	0
6444	cg15575320	chr1	8384513	+	0.836474	0.856456	-0.0199817	-0.0336603	0.00140932	0.910895	0.695419	0.0442264	0.91216	0.781582	0.0336963	0	0.675793	166833	0	0
409022	cg09308738	chr10	125652310	-	0.954793	0.957334	-0.00254152	-0.00379544	0.00140942	0.980923	0.929139	0.0100529	0.981048	0.929229	0.0120877	0	0.675793	486871	0	0
432731	cg08077155	chr11	62435169	+	0.959174	0.962473	-0.00329852	-0.00490178	0.00141092	0.97936	0.9232	0.010097	0.978778	0.936949	0.00922988	0	0.675793	445136	0	0
390951	cg07745596	chr10	54538682	-	0.160366	0.12124	0.0391253	0.376423	0.001411	0.367385	0.0338764	0.0859261	0.278072	0.0282533	0.0650202	0	0.675793	2578	0	0
637923	cg17917181	chr18	22597188	+	0.954486	0.960953	-0.00646722	-0.0096415	0.00141217	0.97902	0.910517	0.0120325	0.97843	0.943829	0.00753187	0	0.675793	336343	0	0
224605	cg24585690	chr5	135231514	+	0.923203	0.909433	0.0137703	0.0214469	0.00141243	0.972201	0.791025	0.0360155	0.969265	0.788442	0.0410807	0	0.675793	224172	0	0
719709	cg01119680	chr22	41986251	-	0.038804	0.0459764	-0.00717238	-0.197819	0.00141258	0.0851404	0.00801563	0.0145507	0.071876	0.0213459	0.0135429	0	0.675793	131778	0	0
258568	cg15014454	chr6	36973093	-	0.411156	0.373232	0.0379241	0.136137	0.00141311	0.655506	0.253686	0.0896377	0.539283	0.241181	0.071672	0	0.675793	18377	0	0
32163	cg10714415	chr1	75594135	+	0.0217125	0.0246624	-0.00294986	-0.128318	0.00141443	0.0570583	0.00996192	0.00645166	0.0415454	0.0130119	0.00636569	0	0.675793	303741	0	0
28463	cg19808825	chr1	55267006	+	0.0591174	0.057013	0.00210439	0.0446077	0.0014145	0.0857616	0.0355498	0.00980779	0.0810187	0.038234	0.010437	0	0.675793	376474	0	0
610313	cg22459948	chr17	36508988	+	0.0166144	0.0191479	-0.00253343	-0.131181	0.00141548	0.0429983	0.00633941	0.00623577	0.0387335	0.00977162	0.00646713	0	0.675793	336317	0	0
588701	cg27598656	chr16	81348532	-	0.00944671	0.0103525	-0.000905784	-0.0656795	0.00141555	0.0254323	0.0012985	0.00440015	0.0240753	0.00240954	0.0054055	0	0.675793	539384	0	0
692434	cg18376773	chr20	44878374	-	0.389733	0.32864	0.0610932	0.239285	0.00141562	0.685837	0.151428	0.102929	0.472226	0.146394	0.0894116	0	0.675793	2409	0	0
724452	cg19546063	chr22	50757480	+	0.950209	0.955691	-0.00548221	-0.00821349	0.00141634	0.976585	0.918835	0.0114119	0.974077	0.925418	0.00995278	0	0.675793	361355	0	0
439757	cg03521925	chr11	70665907	+	0.959926	0.962387	-0.00246132	-0.00365641	0.00141774	0.976327	0.933609	0.00820409	0.977307	0.943334	0.00874995	0	0.675793	492776	0	0
284430	cg25149888	chr7	81075	-	0.934774	0.938359	-0.00358467	-0.00546353	0.00141899	0.973118	0.838869	0.0223038	0.97565	0.873402	0.0257245	0	0.675793	427242	0	0
592817	cg08014937	chr16	88093877	+	0.92794	0.934744	-0.00680421	-0.0104281	0.00141909	0.951193	0.896994	0.0111248	0.956377	0.902257	0.0117072	0	0.675793	324327	0	0
288358	cg19529957	chr7	4198590	-	0.914349	0.919561	-0.00521244	-0.00811257	0.0014195	0.9456	0.877847	0.0151461	0.943003	0.876762	0.0163126	0	0.675793	363265	0	0
387060	cg11198398	chr10	31054241	+	0.535732	0.473077	0.0626548	0.175939	0.00142055	0.857578	0.177369	0.183777	0.798709	0.205938	0.14735	0	0.675793	8069	0	0
544281	cg07516329	chr15	43504963	+	0.772051	0.781026	-0.00897477	-0.016462	0.00142307	0.841342	0.666023	0.0370422	0.834291	0.686368	0.0318561	0	0.675793	258859	0	0
139834	cg25959131	chr3	50855436	-	0.783078	0.812348	-0.0292697	-0.0522857	0.00142417	0.938193	0.44754	0.0934632	0.9518	0.641072	0.090325	0	0.675793	110965	0	0
483794	cg16017313	chr12	109971103	+	0.93202	0.940472	-0.00845181	-0.0128861	0.00142526	0.960106	0.891347	0.01516	0.969961	0.910489	0.014385	0	0.675793	293223	0	0
11305	cg04139043	chr1	18193291	-	0.762553	0.768103	-0.00554947	-0.0103262	0.00142702	0.833148	0.656633	0.0362416	0.824958	0.69739	0.0333446	0	0.675793	325792	0	0
251771	cg08553327	chr6	31543647	+	0.0941426	0.0808476	0.013295	0.19704	0.00142826	0.244309	0.0411837	0.0333723	0.119023	0.0348199	0.0211242	0	0.675793	50733	0	0
494793	cg24727133	chr12	133464594	-	0.0115313	0.0132979	-0.00176655	-0.113761	0.00142827	0.0193704	0.00630864	0.00265452	0.022152	0.00664932	0.0031991	0	0.675793	413514	0	0
561421	cg25271525	chr15	97316699	-	0.610486	0.58376	0.0267257	0.0635181	0.0014302	0.71504	0.472224	0.0491113	0.69299	0.458481	0.0551739	0	0.675793	87237	0	0
390695	cg12553292	chr10	52382517	+	0.0195415	0.0180402	0.00150128	0.0752455	0.00143055	0.0288002	0.0108284	0.00467863	0.0270448	0.0117624	0.00385622	0	0.675793	446990	0	0
153641	cg12276904	chr3	129035177	+	0.020138	0.0181091	0.00202895	0.100549	0.00143134	0.0329027	0.0114548	0.00470759	0.0304152	0.00850204	0.00486695	0	0.675793	384181	0	0
78701	cg08285371	chr2	27323827	+	0.938968	0.942142	-0.00317397	-0.00481726	0.00143296	0.966555	0.914673	0.00981542	0.969125	0.919697	0.0104354	0	0.675793	447966	0	0
620821	cg27298559	chr17	57785523	-	0.0147804	0.0171175	-0.00233709	-0.130024	0.00143363	0.02776	0.00754997	0.00350487	0.0257219	0.0121639	0.00313226	0	0.675793	353771	0	0
378721	cg05837041	chr10	420492	+	0.967146	0.963041	0.00410479	0.00607324	0.00143429	0.983343	0.946407	0.00781991	0.978511	0.943896	0.00997176	0	0.675793	409820	0	0
473317	cg00011461	chr12	57432410	+	0.913229	0.920513	-0.00728368	-0.0113373	0.00143495	0.958806	0.826377	0.0229686	0.956181	0.859126	0.022335	0	0.675793	311805	0	0
87006	cg18312398	chr2	64203304	+	0.927846	0.920046	0.00780039	0.0120496	0.001435	0.959053	0.87453	0.0168676	0.953601	0.877547	0.0196287	0	0.675793	302902	0	0
368559	cg13748564	chr9	116917393	-	0.0531583	0.0449692	0.00818904	0.200347	0.0014361	0.182964	0.0151622	0.0249803	0.093466	0.0128065	0.0170588	0	0.675793	111123	0	0
174004	cg06435920	chr4	7054392	+	0.608839	0.587199	0.0216397	0.0513516	0.00143649	0.731463	0.393995	0.0717132	0.740692	0.428907	0.0753259	0	0.675793	113259	0	0
529595	cg18970679	chr14	89134178	+	0.870561	0.838715	0.0318454	0.0531418	0.00143878	0.955276	0.669145	0.0532703	0.939788	0.674023	0.0661138	0	0.675793	108889	0	0
712081	cg21495622	chr22	24199125	+	0.231419	0.204469	0.0269503	0.170772	0.00143898	0.3823	0.0989777	0.0650201	0.364494	0.0984813	0.0630121	0	0.675793	9022	0	0
234858	cg22026677	chr5	172288445	-	0.940573	0.945227	-0.00465382	-0.00704592	0.00143972	0.964523	0.909137	0.0111235	0.961722	0.917833	0.011171	0	0.675793	385744	0	0
688245	cg10431651	chr20	34022173	-	0.943163	0.948441	-0.00527884	-0.00796794	0.00144148	0.966937	0.911345	0.0119613	0.966983	0.923901	0.0100369	0	0.675793	366106	0	0
261899	cg04927340	chr6	44628990	-	0.95027	0.955068	-0.00479816	-0.00719074	0.00144197	0.974228	0.917531	0.0117476	0.976926	0.934075	0.0115302	0	0.675793	382464	0	0
606185	cg11644059	chr17	21221497	-	0.80423	0.82226	-0.0180306	-0.031599	0.00144379	0.855836	0.729831	0.0220969	0.86373	0.760119	0.0232199	0	0.675793	174895	0	0
111475	cg07734803	chr2	192217615	+	0.957473	0.963667	-0.00619457	-0.0092079	0.00144544	0.980868	0.928405	0.0107401	0.977957	0.942608	0.00895543	0	0.675793	343461	0	0
196914	cg13733984	chr4	171691186	-	0.815201	0.831045	-0.0158446	-0.0274384	0.00144719	0.901297	0.690389	0.043043	0.911784	0.743028	0.0418604	0	0.675793	192663	0	0
92687	cg26565451	chr2	88428285	+	0.930271	0.936829	-0.00655859	-0.0100282	0.00144817	0.962623	0.886759	0.0133581	0.957724	0.91077	0.0116079	0	0.675793	330338	0	0
84751	cg08405848	chr2	50168330	+	0.943564	0.951197	-0.00763215	-0.0115011	0.00144829	0.97217	0.899092	0.0141437	0.972685	0.926797	0.0112857	0	0.675793	309658	0	0
533007	cg03725360	chr14	97765969	-	0.932751	0.943099	-0.0103481	-0.0157494	0.00144834	0.969048	0.857117	0.0188584	0.972023	0.90435	0.0160243	0	0.675793	264985	0	0
51573	cg00767644	chr1	174968745	-	0.0914138	0.0868059	0.00460792	0.0670874	0.00145087	0.118336	0.0656583	0.0110071	0.10897	0.0612646	0.0124049	0	0.675793	212012	0	0
682487	cg07305931	chr20	6604933	+	0.0242256	0.0278619	-0.00363628	-0.14567	0.00145107	0.0547961	0.0100558	0.0080246	0.0674938	0.01719	0.00890323	0	0.675793	259554	0	0
468838	cg00449612	chr12	50331506	-	0.865584	0.878114	-0.0125303	-0.0204997	0.00145207	0.939846	0.760888	0.0330643	0.938532	0.828294	0.0308299	0	0.675793	230099	0	0
562716	cg12064201	chr15	101606006	+	0.968337	0.970825	-0.00248789	-0.00366408	0.00145333	0.980471	0.953449	0.00650947	0.981182	0.956022	0.00560019	0	0.675793	492473	0	0
138245	cg22919115	chr3	48936584	+	0.445352	0.415208	0.0301445	0.0988151	0.00145407	0.581041	0.275519	0.0650407	0.505165	0.270983	0.059749	0	0.675793	40715	0	0
272895	cg03835378	chr6	127664201	-	0.0206231	0.0231521	-0.00252903	-0.114481	0.00145509	0.0294911	0.012117	0.00364329	0.0312285	0.0150398	0.00400896	0	0.675793	336665	0	0
361049	cg13532055	chr9	71649195	-	0.930313	0.938732	-0.00841855	-0.0128589	0.00145544	0.960606	0.886717	0.0150321	0.963171	0.918838	0.0112758	0	0.675793	293562	0	0
388415	cg25447559	chr10	38073387	-	0.927173	0.934179	-0.00700529	-0.0107439	0.00145638	0.960762	0.868754	0.0175014	0.964942	0.888095	0.0194922	0	0.675793	319854	0	0
271748	cg14812218	chr6	117996645	-	0.0242586	0.0216938	0.00256477	0.112264	0.00145655	0.0360564	0.0138459	0.00507312	0.0315162	0.0127275	0.00472634	0	0.675793	333702	0	0
208639	cg21489565	chr5	39723183	-	0.902401	0.910409	-0.00800782	-0.0126068	0.00145702	0.96566	0.792455	0.0364136	0.965611	0.801672	0.034926	0	0.675793	296401	0	0
362844	cg23533601	chr9	87723267	+	0.958557	0.962907	-0.00434941	-0.00646407	0.00145766	0.97984	0.93418	0.00949569	0.980941	0.941756	0.00943659	0	0.675793	399687	0	0
724557	cg02227453	chr22	50919482	-	0.284753	0.255226	0.029527	0.152284	0.0014578	0.533084	0.116366	0.0832424	0.386481	0.134969	0.0642532	0	0.675793	12989	0	0
115084	cg15155371	chr2	210561004	+	0.959701	0.964133	-0.00443235	-0.0065793	0.00145931	0.979004	0.93807	0.00947927	0.976683	0.943084	0.00806716	0	0.675793	396849	0	0
44961	cg00589492	chr1	155035881	-	0.0603246	0.0510585	0.00926609	0.203837	0.00146061	0.12489	0.0326536	0.0187239	0.0917453	0.027638	0.0159651	0	0.675793	93276	0	0
706319	cg25627766	chr21	44312722	+	0.698317	0.662871	0.0354454	0.0740641	0.00146292	0.824813	0.532184	0.0542632	0.776405	0.524523	0.065658	0	0.675793	69780	0	0
515399	cg15623239	chr14	24608277	-	0.956492	0.958757	-0.00226487	-0.00337684	0.00146311	0.974488	0.934628	0.00902755	0.976043	0.934371	0.0101907	0	0.675793	505612	0	0
99901	cg00722394	chr2	123147539	-	0.893016	0.900423	-0.00740632	-0.0117844	0.00146432	0.93307	0.836998	0.0194207	0.937541	0.860745	0.0172684	0	0.675793	306187	0	0
344337	cg14265650	chr8	102217569	+	0.0130433	0.0142151	-0.00117178	-0.0715583	0.00146474	0.0294713	0.00116231	0.00559655	0.0279377	0.00582324	0.00522749	0	0.675793	495160	0	0
575831	cg01383799	chr16	29819361	-	0.0120267	0.0150855	-0.00305877	-0.187598	0.00146485	0.0260137	0.00365049	0.00490563	0.0311457	0.0045478	0.00598823	0	0.675793	296090	0	0
296490	cg10754659	chr7	38110151	-	0.93953	0.933356	0.00617335	0.00941028	0.00146488	0.978243	0.83924	0.0224983	0.973244	0.843119	0.0270954	0	0.675793	340137	0	0
189863	cg13598159	chr4	119258656	+	0.95841	0.965825	-0.00741482	-0.0110042	0.00146678	0.975469	0.93095	0.00904574	0.981919	0.945068	0.00863836	0	0.675793	316232	0	0
274920	cg07730827	chr6	137255610	-	0.928668	0.932462	-0.00379394	-0.00581938	0.00146833	0.957473	0.857013	0.0177425	0.954539	0.895664	0.0172211	0	0.675793	416732	0	0
655304	cg01205324	chr19	10138615	+	0.0334686	0.0384715	-0.00500291	-0.157164	0.0014705	0.0528647	0.0163518	0.00850603	0.0585039	0.02806	0.00741178	0	0.675793	196004	0	0
310640	cg11161873	chr7	112120943	+	0.948872	0.952871	-0.0039994	-0.00600489	0.00147059	0.969407	0.923118	0.00976188	0.963484	0.932546	0.00824091	0	0.675793	411623	0	0
569139	cg08819417	chr16	4659349	-	0.946872	0.95195	-0.00507747	-0.00763516	0.00147098	0.966841	0.919693	0.0104864	0.967722	0.929532	0.00862257	0	0.675793	372966	0	0
436132	cg14538055	chr11	66035834	-	0.078386	0.0862707	-0.00788477	-0.12328	0.00147289	0.11802	0.0448455	0.0140095	0.119313	0.0586978	0.016871	0	0.675793	116807	0	0
310822	cg05232889	chr7	114055419	+	0.725231	0.691578	0.0336532	0.0675945	0.0014774	0.919295	0.440242	0.093303	0.838992	0.430467	0.0971557	0	0.675793	80030	0	0
124421	cg08051728	chr2	240582281	+	0.941871	0.948205	-0.00633418	-0.00956854	0.00148004	0.97397	0.880251	0.0139158	0.965811	0.902307	0.0132113	0	0.675793	337545	0	0
618072	cg00612977	chr17	48241445	-	0.115347	0.107919	0.00742756	0.088126	0.00148044	0.198184	0.0698943	0.0232075	0.162201	0.058942	0.0199497	0	0.675793	126191	0	0
416150	cg01720040	chr11	1581101	+	0.423256	0.40823	0.0150252	0.0509206	0.00148109	0.589207	0.286438	0.0448464	0.507444	0.286831	0.0486571	0	0.675793	114289	0	0
662317	cg11523128	chr19	19773068	-	0.0627201	0.0746021	-0.0118819	-0.218338	0.00148187	0.118033	0.0290724	0.0180277	0.133982	0.0434101	0.0207481	0	0.675793	62289	0	0
480776	cg17591593	chr12	99125993	+	0.96177	0.965153	-0.00338229	-0.00501264	0.00148193	0.974851	0.941179	0.00738709	0.981217	0.945236	0.00823195	0	0.675793	441471	0	0
716975	cg19530178	chr22	37578528	+	0.950408	0.952825	-0.00241735	-0.0036267	0.00148369	0.97224	0.923895	0.00983185	0.96748	0.939507	0.00898832	0	0.675793	494062	0	0
84525	cg26912903	chr2	48334617	-	0.976971	0.978815	-0.00184383	-0.00269269	0.00148502	0.988034	0.963222	0.00549886	0.988685	0.965756	0.00500448	0	0.675793	539841	0	0
452315	cg10578112	chr11	122526355	+	0.0291127	0.0334924	-0.00437972	-0.153127	0.00148517	0.0479934	0.0130646	0.00725161	0.0511735	0.0137193	0.00849834	0	0.675793	221903	0	0
374248	cg11289645	chr9	134527184	+	0.0519148	0.066687	-0.0147722	-0.308698	0.00148553	0.107866	0.0151794	0.0219189	0.117741	0.0283165	0.0255543	0	0.675793	41156	0	0
248316	cg27191906	chr6	29140126	+	0.820976	0.800502	0.020474	0.0359911	0.00148557	0.92211	0.651591	0.0450099	0.916117	0.619508	0.0643961	0	0.675793	158335	0	0
15175	cg08035105	chr1	25756455	-	0.00860862	0.0101049	-0.00149631	-0.111578	0.00148674	0.0200769	0.00350307	0.00325111	0.0190071	0.00451687	0.00342619	0	0.675793	447710	0	0
66296	cg00346898	chr1	231761721	-	0.377888	0.370575	0.0073132	0.0274601	0.00148772	0.540038	0.265431	0.0455315	0.489245	0.286614	0.0434125	0	0.675793	192561	0	0
642696	cg12413852	chr18	55820185	-	0.964628	0.968352	-0.00372411	-0.00550212	0.00149111	0.984784	0.937588	0.00780035	0.984377	0.95249	0.00833122	0	0.675793	426097	0	0
573520	cg04802498	chr16	22018183	+	0.944854	0.932102	0.0127519	0.0193967	0.00149152	0.979216	0.858872	0.0235996	0.978962	0.855656	0.0289476	0	0.675793	237164	0	0
195071	cg19553598	chr4	156131088	-	0.477427	0.42886	0.0485669	0.151425	0.00149249	0.791369	0.133818	0.14125	0.630737	0.138374	0.111863	0	0.675793	13221	0	0
615227	cg18051346	chr17	43238278	-	0.0351784	0.0317217	0.00345676	0.114837	0.00149266	0.0505992	0.0197561	0.00667159	0.0422716	0.0202839	0.00621736	0	0.675793	270138	0	0
456602	cg14463348	chr12	471081	+	0.969522	0.961076	0.00844565	0.0124932	0.0014935	0.991912	0.925109	0.0122708	0.984072	0.910389	0.0176257	0	0.675793	297683	0	0
70799	cg06417878	chr2	497417	+	0.932055	0.936969	-0.00491352	-0.00750518	0.00149401	0.962364	0.894056	0.0131567	0.955402	0.910999	0.00984577	0	0.675793	375721	0	0
369093	cg03040139	chr9	119606687	-	0.432924	0.464102	-0.0311772	-0.0981357	0.00149479	0.657675	0.153699	0.0875737	0.669988	0.306038	0.0814615	0	0.675793	41323	0	0
108455	cg04902302	chr2	175594739	-	0.132908	0.162962	-0.0300535	-0.275364	0.00149592	0.342078	0.0582406	0.0485248	0.406577	0.087931	0.0688263	0	0.675793	6386	0	0
411940	cg11356398	chr10	133783182	+	0.951598	0.954586	-0.002988	-0.00447597	0.00149599	0.972734	0.926452	0.00925668	0.973348	0.929613	0.0104857	0	0.675793	460150	0	0
663315	cg23645261	chr19	30940563	+	0.817661	0.83775	-0.0200888	-0.0345985	0.00149603	0.897708	0.66269	0.0478219	0.901574	0.736928	0.0402276	0	0.675793	163361	0	0
421361	cg18986534	chr11	11863292	-	0.0094002	0.0108101	-0.00140994	-0.101215	0.00149649	0.019914	0.00297954	0.00377784	0.0227699	0.00388809	0.00423416	0	0.675793	459395	0	0
545443	cg08518709	chr15	48065468	-	0.928862	0.936804	-0.00794277	-0.0121539	0.00149711	0.96918	0.811704	0.0263488	0.968495	0.862895	0.0192095	0	0.675793	301674	0	0
395779	cg04424015	chr10	77163615	-	0.00943224	0.0108495	-0.00141731	-0.101564	0.00149727	0.0192907	0.00385202	0.00307523	0.0184942	0.00509181	0.0037733	0	0.675793	458352	0	0
645933	cg19924120	chr18	76160108	-	0.908061	0.896282	0.0117794	0.0186306	0.00149779	0.960504	0.784664	0.0272518	0.946444	0.779995	0.0400802	0	0.675793	242394	0	0
662279	cg16035419	chr19	19747545	-	0.942553	0.946535	-0.00398199	-0.00601838	0.00149866	0.964625	0.908975	0.011212	0.969383	0.926006	0.0102845	0	0.675793	411270	0	0
471112	cg26971330	chr12	54070229	-	0.0181486	0.0203759	-0.00222731	-0.109865	0.00149941	0.0300587	0.0106896	0.0037804	0.0319581	0.0125951	0.0044714	0	0.675793	364227	0	0
720732	cg13160331	chr22	43547217	+	0.162934	0.155555	0.00737889	0.0629101	0.00149958	0.293924	0.0695611	0.0431255	0.247024	0.0770353	0.0405616	0	0.675793	127181	0	0
181651	cg03020822	chr4	56915374	-	0.0127047	0.0142244	-0.00151974	-0.0934721	0.00150104	0.0288308	0.00413356	0.00402637	0.0259317	0.00554727	0.00432341	0	0.675793	444523	0	0
85027	cg08139509	chr2	54014491	+	0.0190765	0.0222542	-0.00317771	-0.149634	0.00150182	0.0330799	0.00775894	0.00565925	0.0366057	0.0114837	0.00606155	0	0.675793	287923	0	0
699449	cg12372745	chr20	62187666	-	0.981134	0.982319	-0.00118518	-0.00172411	0.00150408	0.989903	0.967711	0.00368916	0.990526	0.970701	0.00448361	0	0.675793	598301	0	0
522445	cg03867746	chr14	62130280	+	0.866022	0.850465	0.0155566	0.02585	0.00150429	0.943947	0.733305	0.0416512	0.929899	0.722931	0.0454492	0	0.675793	200146	0	0
6984	cg20700740	chr1	9339683	+	0.352214	0.328647	0.023567	0.09706	0.00150655	0.752215	0.109574	0.1088	0.638767	0.138835	0.0972702	0	0.675793	42322	0	0
562024	cg25385940	chr15	99789637	+	0.207376	0.270036	-0.0626604	-0.365422	0.00151129	0.591278	0.0460379	0.114397	0.658133	0.0598696	0.147445	0	0.675793	1606	0	0
663969	cg08098800	chr19	33870655	-	0.954975	0.961032	-0.00605698	-0.00902724	0.00151166	0.98325	0.901928	0.0128438	0.985187	0.923806	0.011932	0	0.675793	346568	0	0
143229	cg11876912	chr3	63602009	+	0.758025	0.721443	0.0365821	0.070408	0.00151195	0.893098	0.554941	0.0743949	0.84154	0.511057	0.0887429	0	0.675793	75501	0	0
227157	cg00978427	chr5	140736762	+	0.572271	0.608454	-0.0361825	-0.0869743	0.00151342	0.783985	0.356621	0.0887255	0.809721	0.420972	0.0949456	0	0.675793	52645	0	0
680732	cg13077517	chr20	2082435	-	0.1146	0.108873	0.00572697	0.0678828	0.00151389	0.147379	0.066295	0.0158339	0.1419	0.0645229	0.0155755	0	0.675793	170757	0	0
605881	cg07507836	chr17	20056735	+	0.918187	0.92268	-0.00449338	-0.00696728	0.00151452	0.949492	0.879464	0.0170893	0.952891	0.892029	0.0150722	0	0.675793	387538	0	0
184783	cg16023162	chr4	82136337	-	0.0366372	0.0371983	-0.000561126	-0.0172545	0.00151488	0.0865896	0.0169941	0.0130225	0.0664458	0.0175289	0.0109878	0	0.675793	604441	0	0
576358	cg10424530	chr16	30379585	+	0.0836885	0.0920286	-0.0083401	-0.12303	0.0015154	0.133448	0.0437702	0.0192215	0.128329	0.062628	0.0160011	0	0.675793	108375	0	0
680034	cg25917590	chr20	552967	-	0.400738	0.352245	0.0484931	0.181253	0.00151625	0.690101	0.229993	0.083824	0.471212	0.195955	0.0741903	0	0.675793	7270	0	0
612128	cg04571740	chr17	39122792	-	0.980322	0.984082	-0.00376043	-0.00546779	0.00151639	0.993644	0.950427	0.00770327	0.995329	0.964769	0.00696344	0	0.675793	427124	0	0
673718	cg20102506	chr19	49621876	-	0.0938416	0.0895141	0.0043275	0.0614117	0.00151725	0.131959	0.0571188	0.0124427	0.115738	0.0572249	0.0149157	0	0.675793	224310	0	0
222067	cg07897069	chr5	126564606	+	0.759455	0.743387	0.0160681	0.030446	0.00151797	0.876231	0.595948	0.0545628	0.846071	0.608747	0.053979	0	0.675793	179721	0	0
320847	cg12620706	chr7	155917159	+	0.7584	0.770462	-0.0120618	-0.0224705	0.00151859	0.884633	0.602772	0.0571059	0.874765	0.660555	0.0499208	0	0.675793	218114	0	0
474383	cg16776821	chr12	59281005	-	0.618597	0.656625	-0.0380286	-0.0847413	0.00151921	0.812836	0.43207	0.0721827	0.775193	0.534764	0.0623452	0	0.675793	55248	0	0
394207	cg22630628	chr10	73337125	-	0.948937	0.953639	-0.0047026	-0.00705764	0.0015201	0.972435	0.918006	0.0105378	0.974137	0.927577	0.0112099	0	0.675793	385474	0	0
75971	cg23483069	chr2	17825778	-	0.786564	0.791995	-0.00543026	-0.00980162	0.00152073	0.840468	0.734679	0.0193235	0.848346	0.756225	0.0215734	0	0.675793	333797	0	0
300197	cg17479718	chr7	55410964	-	0.906775	0.912606	-0.00583163	-0.00914796	0.00152146	0.947475	0.855817	0.0156655	0.940839	0.881431	0.0136979	0	0.675793	344472	0	0
587791	cg05266963	chr16	77443037	-	0.935711	0.924863	0.0108484	0.016645	0.00152284	0.964727	0.874909	0.0177442	0.951978	0.874176	0.0203227	0	0.675793	257292	0	0
597198	cg17447802	chr17	1921104	-	0.878615	0.885715	-0.00709976	-0.0114809	0.00152384	0.923025	0.821339	0.0191564	0.916365	0.84377	0.0161363	0	0.675793	309926	0	0
322654	cg05012972	chr7	158250129	-	0.820691	0.836306	-0.0156147	-0.0268669	0.00152407	0.889092	0.706127	0.0344466	0.894226	0.763983	0.0350343	0	0.675793	195326	0	0
443802	cg02992048	chr11	84676688	+	0.912116	0.900396	0.0117194	0.018453	0.00152548	0.954119	0.803396	0.0266472	0.942391	0.785999	0.0325539	0	0.675793	243600	0	0
219846	cg14136686	chr5	112630976	+	0.0439911	0.0537746	-0.00978354	-0.240261	0.00152586	0.127431	0.0176516	0.0191623	0.146229	0.0207791	0.0260167	0	0.675793	85808	0	0
50922	cg15515745	chr1	171779314	-	0.948168	0.937718	0.0104493	0.0158197	0.00152663	0.975747	0.907967	0.0137573	0.962394	0.890059	0.0180308	0	0.675793	264342	0	0
387047	cg21195070	chr10	31017368	-	0.664116	0.612433	0.0516839	0.11508	0.0015274	0.923452	0.273919	0.15862	0.864497	0.303356	0.145874	0	0.675793	28522	0	0
436552	cg11574130	chr11	66379666	+	0.963822	0.957271	0.0065514	0.00973855	0.001528	0.987748	0.896191	0.0136971	0.978709	0.918806	0.0140495	0	0.675793	334781	0	0
632302	cg06466415	chr17	80012647	+	0.97549	0.979932	-0.00444189	-0.00648804	0.00152834	0.987955	0.954276	0.00706061	0.992721	0.963735	0.00593847	0	0.675793	399079	0	0
432987	cg12059507	chr11	62606662	+	0.0609022	0.0578812	0.00302101	0.0628185	0.00152835	0.0832103	0.0287156	0.0118668	0.0762261	0.0329492	0.0119513	0	0.675793	298758	0	0
41756	cg15636040	chr1	147142673	+	0.00620837	0.00693448	-0.000726117	-0.0632253	0.00153071	0.0171957	0.00220926	0.00224516	0.0104442	0.00245342	0.00207999	0	0.675793	572366	0	0
235381	cg26342170	chr5	173252771	-	0.869583	0.881728	-0.0121455	-0.0197848	0.00153235	0.934408	0.757114	0.0313771	0.930057	0.805214	0.0274008	0	0.675793	234584	0	0
491682	cg05761732	chr12	128124963	+	0.612539	0.642034	-0.0294948	-0.0667825	0.00153305	0.732867	0.443905	0.0654451	0.759475	0.498181	0.0608603	0	0.675793	81462	0	0
207488	cg15003812	chr5	34899275	+	0.929723	0.931784	-0.00206083	-0.00316039	0.00153481	0.958861	0.89437	0.014129	0.964306	0.905113	0.0149141	0	0.675793	515874	0	0
721414	cg10898989	chr22	45060369	-	0.0321104	0.0306432	0.00146721	0.0511629	0.00153522	0.0566209	0.020732	0.00732427	0.0458422	0.0180051	0.00554895	0	0.675793	451600	0	0
699075	cg10436333	chr20	61883856	+	0.590385	0.533982	0.0564031	0.142329	0.0015361	0.821619	0.28623	0.113237	0.724671	0.314336	0.112996	0	0.675793	16107	0	0
626756	cg22853140	chr17	74462145	-	0.0295217	0.0336248	-0.00410308	-0.142503	0.00153776	0.0516094	0.0138813	0.00728841	0.0565052	0.0178337	0.00926571	0	0.675793	234883	0	0
593055	cg02808931	chr16	88503009	+	0.931349	0.935721	-0.00437178	-0.0066846	0.00153801	0.956922	0.895744	0.013759	0.957844	0.898395	0.0127756	0	0.675793	394238	0	0
174001	cg04194054	chr4	7053957	-	0.922166	0.926193	-0.00402711	-0.00621926	0.00154009	0.950759	0.889504	0.0114975	0.948076	0.900984	0.0119116	0	0.675793	405972	0	0
713235	cg06755180	chr22	27299057	+	0.0655918	0.0728062	-0.00721441	-0.131509	0.00154024	0.13367	0.0326601	0.0204547	0.138769	0.0410739	0.0243478	0	0.675793	130862	0	0
506558	cg10375174	chr13	96397759	+	0.968907	0.972558	-0.00365078	-0.00537045	0.00154095	0.988991	0.943655	0.00841769	0.985908	0.956716	0.00774441	0	0.675793	430051	0	0
170075	cg11411884	chr4	1016333	+	0.963474	0.957953	0.00552104	0.00820551	0.00154111	0.979509	0.933727	0.00843368	0.974942	0.935539	0.00907813	0	0.675793	361521	0	0
400496	cg20235036	chr10	97850399	-	0.977934	0.979756	-0.00182194	-0.00265815	0.00154142	0.988335	0.959721	0.00544834	0.988634	0.966865	0.00540784	0	0.675793	541792	0	0
502148	cg11925609	chr13	49433820	+	0.292689	0.260769	0.0319194	0.16077	0.00154258	0.566097	0.0342498	0.115449	0.582023	0.121968	0.0969463	0	0.675793	10898	0	0
495728	cg02847037	chr13	22033729	+	0.031083	0.0390754	-0.00799245	-0.25646	0.0015433	0.0618954	0.0121886	0.0105901	0.0864113	0.0177236	0.0161423	0	0.675793	114691	0	0
289792	cg26062439	chr7	6577467	+	0.936328	0.940588	-0.00425936	-0.0064789	0.00154551	0.958304	0.909026	0.0101016	0.963427	0.925604	0.0097348	0	0.675793	399306	0	0
532425	cg16656633	chr14	96136206	-	0.931312	0.935581	-0.00426841	-0.00652716	0.00154675	0.957745	0.891166	0.0131627	0.960553	0.914864	0.011403	0	0.675793	398124	0	0
269696	cg05922610	chr6	108495985	+	0.143566	0.137663	0.00590342	0.0565546	0.00154758	0.251062	0.0831604	0.0255229	0.192203	0.0711785	0.0256835	0	0.675793	165277	0	0
363238	cg02104500	chr9	90340593	+	0.0399498	0.0451684	-0.00521862	-0.143364	0.00154878	0.0790843	0.0183089	0.0128331	0.075508	0.0270653	0.0119335	0	0.675793	188024	0	0
670038	cg03486540	chr19	44598375	-	0.00783794	0.0102249	-0.00238698	-0.181185	0.00154891	0.0204338	0.00100308	0.00384079	0.0266298	0.00202169	0.00502614	0	0.675793	349085	0	0
77573	cg06293172	chr2	25045211	-	0.951505	0.958362	-0.00685676	-0.0102518	0.00154897	0.972562	0.916533	0.0103256	0.979945	0.940242	0.0104779	0	0.675793	326941	0	0
97401	cg11986760	chr2	112420098	+	0.644395	0.669772	-0.0253776	-0.0548905	0.00154905	0.750103	0.528794	0.0464638	0.744529	0.607663	0.0364119	0	0.675793	104826	0	0
210931	cg07638871	chr5	56247860	-	0.0164905	0.0199604	-0.00346983	-0.177578	0.00154951	0.0541738	0.00316981	0.00857066	0.0475057	0.00328048	0.00946563	0	0.675793	269373	0	0
28504	cg10901780	chr1	55330824	+	0.855144	0.87483	-0.0196861	-0.0324601	0.00155007	0.919956	0.720077	0.0349311	0.920053	0.836101	0.0232768	0	0.675793	171470	0	0
667926	cg26332378	chr19	40828159	-	0.951369	0.955376	-0.00400738	-0.00600125	0.00155023	0.973337	0.925657	0.00997728	0.975758	0.937977	0.00900861	0	0.675793	411719	0	0
429310	cg11667435	chr11	47297711	+	0.965062	0.968703	-0.00364046	-0.00537637	0.00155032	0.983776	0.939805	0.00847808	0.985732	0.946696	0.00911205	0	0.675793	429867	0	0
193526	cg17073859	chr4	148401828	-	0.86583	0.876712	-0.0108813	-0.0178136	0.0015505	0.916481	0.788959	0.023825	0.927413	0.83489	0.0207876	0	0.675793	248227	0	0
271644	cg20916535	chr6	117592262	+	0.0918901	0.100496	-0.00860584	-0.11698	0.00155212	0.229568	0.0344212	0.0350508	0.187014	0.0522853	0.033714	0	0.675793	103735	0	0
456174	cg17582306	chr11	134241099	-	0.920226	0.927167	-0.00694148	-0.0107256	0.00155253	0.951596	0.876505	0.0146889	0.94749	0.89706	0.0129329	0	0.675793	320129	0	0
317051	cg14031363	chr7	142700023	+	0.771272	0.719742	0.0515292	0.0984369	0.00155324	0.921713	0.573487	0.0771418	0.84202	0.600329	0.0628794	0	0.675793	41071	0	0
678140	cg16349424	chr19	56170507	-	0.907787	0.917233	-0.00944629	-0.014773	0.0015536	0.946297	0.867143	0.0185191	0.950699	0.887955	0.017434	0	0.675793	273786	0	0
633225	cg15001953	chr17	80702150	-	0.941422	0.933951	0.00747176	0.0113746	0.0015578	0.978737	0.880957	0.018625	0.96244	0.882426	0.017469	0	0.675793	311323	0	0
708965	cg26735294	chr21	47813364	+	0.91241	0.918828	-0.00641833	-0.0100038	0.00155914	0.947143	0.874426	0.0137662	0.942394	0.894682	0.0126387	0	0.675793	330718	0	0
343893	cg05833318	chr8	101170644	-	0.0286975	0.0272328	0.00146469	0.0556657	0.00155951	0.0453176	0.0168959	0.00551915	0.0371284	0.0166867	0.00538515	0	0.675793	451943	0	0
329302	cg18025275	chr8	22498768	+	0.941573	0.946454	-0.00488143	-0.0073819	0.00155994	0.966301	0.91166	0.0109458	0.962013	0.931319	0.00797016	0	0.675793	378292	0	0
348840	cg01814774	chr8	126763633	-	0.967996	0.97266	-0.00466373	-0.00686336	0.00156388	0.987607	0.950459	0.00806968	0.982948	0.958427	0.0069672	0	0.675793	389940	0	0
164053	cg20075575	chr3	183733220	-	0.944839	0.949897	-0.00505829	-0.00762255	0.00156419	0.963666	0.910626	0.010369	0.969147	0.928572	0.0100163	0	0.675793	373242	0	0
692742	cg26046136	chr20	45526613	+	0.727	0.697019	0.0299808	0.0599153	0.00156523	0.860097	0.533848	0.0592091	0.805116	0.603643	0.0532324	0	0.675793	94233	0	0
455230	cg08834986	chr11	130776184	+	0.967705	0.970998	-0.0032935	-0.0048517	0.0015659	0.984769	0.937221	0.00957065	0.987443	0.942923	0.00978347	0	0.675793	446828	0	0
418408	cg09588815	chr11	3845298	+	0.971586	0.973711	-0.00212499	-0.00311985	0.00156654	0.985211	0.957128	0.00618715	0.988213	0.960763	0.00634993	0	0.675793	517885	0	0
69620	cg23547721	chr1	246158768	+	0.952982	0.958769	-0.00578783	-0.0086451	0.00156658	0.974687	0.915422	0.0110693	0.977699	0.940125	0.00880953	0	0.675793	353286	0	0
426647	cg04948929	chr11	35507505	+	0.0229285	0.0252253	-0.00229682	-0.0972758	0.00156689	0.0386048	0.011238	0.00652124	0.0375098	0.0171069	0.00574536	0	0.675793	357603	0	0
106420	cg18866212	chr2	167698517	-	0.787724	0.808002	-0.020278	-0.0362147	0.00156822	0.862059	0.663554	0.0402825	0.871848	0.722863	0.0359502	0	0.675793	157541	0	0
545501	cg22732635	chr15	48441511	-	0.963971	0.967048	-0.00307641	-0.00454975	0.00156891	0.98322	0.944682	0.00787887	0.979867	0.95288	0.00700464	0	0.675793	457431	0	0
63911	cg17813331	chr1	226315651	+	0.232905	0.216417	0.0164875	0.101407	0.00156953	0.440949	0.144932	0.0550507	0.344272	0.113867	0.0508706	0	0.675793	38381	0	0
454079	cg07451370	chr11	126848024	-	0.791337	0.824257	-0.0329197	-0.0580823	0.00157078	0.948811	0.440163	0.103628	0.947836	0.690568	0.0715759	0	0.675793	97930	0	0
138599	cg07285807	chr3	49235826	-	0.961731	0.967375	-0.00564467	-0.0083562	0.00157201	0.983295	0.879404	0.0141075	0.982838	0.944058	0.00882502	0	0.675793	358669	0	0
390979	cg02875589	chr10	54984564	+	0.941899	0.947591	-0.00569138	-0.00860015	0.00157209	0.968982	0.906048	0.0114239	0.964052	0.919537	0.0120566	0	0.675793	354103	0	0
149079	cg12596171	chr3	113251061	+	0.00607418	0.00709328	-0.00101909	-0.0886834	0.00157212	0.0141695	0.00170186	0.00256375	0.015056	0.00260381	0.00293979	0	0.675793	519965	0	0
496324	cg07160044	chr13	24735301	+	0.12147	0.114219	0.00725141	0.0818526	0.00157281	0.162454	0.079914	0.0154189	0.136864	0.080964	0.0158721	0	0.675793	130009	0	0
394722	cg01687711	chr10	74386160	-	0.0112351	0.0131267	-0.00189161	-0.123109	0.00157305	0.0196818	0.00620012	0.00282562	0.0205301	0.00724118	0.00315808	0	0.675793	398953	0	0
723573	cg06069877	chr22	49690911	+	0.926675	0.931423	-0.00474797	-0.0072945	0.00157379	0.957452	0.846095	0.0178343	0.961324	0.898545	0.0150769	0	0.675793	380253	0	0
299325	cg06841833	chr7	50348195	-	0.00571597	0.00751338	-0.0017974	-0.156225	0.00157398	0.0108286	0.00206885	0.00203722	0.0157378	0.00340547	0.0031429	0	0.675793	409819	0	0
27374	cg08736216	chr1	53307985	+	0.758114	0.715703	0.042411	0.0819413	0.00157408	0.923371	0.416107	0.104254	0.885061	0.367963	0.107934	0	0.675793	58706	0	0
562198	cg11514156	chr15	100272266	-	0.93438	0.913727	0.0206523	0.0318998	0.00157491	0.97442	0.780182	0.0315223	0.959906	0.751779	0.0508286	0	0.675793	173683	0	0
345410	cg06647660	chr8	106540963	+	0.967503	0.97204	-0.00453722	-0.00668098	0.00157679	0.985915	0.935909	0.0094379	0.985718	0.951597	0.00745479	0	0.675793	394326	0	0
147070	cg03160445	chr3	100120349	+	0.0202147	0.0225073	-0.00229262	-0.105514	0.00157718	0.0290998	0.011995	0.00390364	0.0321447	0.0147541	0.00453588	0	0.675793	357997	0	0
206848	cg08553136	chr5	32090873	+	0.961635	0.963857	-0.00222186	-0.00329527	0.00157737	0.979057	0.936049	0.00882786	0.984027	0.944494	0.00925697	0	0.675793	509471	0	0
440032	cg05240381	chr11	71164349	+	0.0445405	0.0388256	0.0057149	0.15969	0.00157841	0.0692399	0.0272514	0.00779173	0.0516999	0.0252284	0.00703169	0	0.675793	171129	0	0
466521	cg19814923	chr12	43727305	+	0.923935	0.934593	-0.0106576	-0.01637	0.00157846	0.97026	0.817021	0.0258318	0.974051	0.872711	0.020065	0	0.675793	259674	0	0
389235	cg10233401	chr10	45192368	-	0.940172	0.948766	-0.00859394	-0.01299	0.00157852	0.970399	0.901211	0.0149878	0.973273	0.915639	0.0132784	0	0.675793	292090	0	0
650695	cg04535176	chr19	3359655	+	0.0144789	0.0174851	-0.00300619	-0.16711	0.00157934	0.0353867	0.00150006	0.00586887	0.0349695	0.0040923	0.00642945	0	0.675793	299815	0	0
21764	cg18483428	chr1	39408558	+	0.85704	0.868834	-0.0117935	-0.0194914	0.0015846	0.901592	0.810303	0.0202599	0.909373	0.827751	0.0208025	0	0.676224	236535	0	0
613341	cg04892772	chr17	40780291	-	0.968432	0.971346	-0.00291373	-0.0042899	0.00158695	0.982493	0.955788	0.00570709	0.983373	0.954943	0.00641342	0	0.676224	467016	0	0
699091	cg23048303	chr20	61895726	+	0.846242	0.853666	-0.00742455	-0.0124558	0.00158736	0.906296	0.71486	0.0346812	0.908146	0.790003	0.0300291	0	0.676224	298118	0	0
341604	cg07781212	chr8	87535689	+	0.0199529	0.0242297	-0.00427688	-0.192556	0.00158751	0.0347912	0.00825797	0.00591689	0.0470238	0.0109621	0.00771164	0	0.676224	226535	0	0
549432	cg24167897	chr15	63796719	-	0.0465475	0.0427439	0.00380355	0.100458	0.0015878	0.0657591	0.026317	0.00781165	0.0577791	0.02888	0.00717229	0	0.676224	250168	0	0
158364	cg00184189	chr3	150470483	-	0.975228	0.97795	-0.00272224	-0.00398075	0.00158797	0.988402	0.960501	0.00648434	0.988372	0.966634	0.00560963	0	0.676224	479134	0	0
444439	cg00167102	chr11	87933596	+	0.931631	0.933329	-0.00169728	-0.00259811	0.00158814	0.967076	0.833865	0.0209055	0.976118	0.882422	0.0211762	0	0.676224	545058	0	0
669873	cg20110633	chr19	44302906	+	0.0613459	0.0566954	0.00465045	0.0972422	0.0015896	0.085961	0.0331871	0.00972954	0.0769492	0.0328015	0.0101414	0	0.676224	210173	0	0
588353	cg02450832	chr16	80308154	+	0.8763	0.860763	0.0155369	0.0255149	0.00158971	0.932248	0.785791	0.032013	0.913115	0.789181	0.03218	0	0.676224	201815	0	0
137982	cg00157983	chr3	48555229	+	0.955019	0.959014	-0.00399462	-0.0059596	0.00158982	0.974671	0.925964	0.0100934	0.978245	0.937913	0.0103957	0	0.676224	412861	0	0
561873	cg11346805	chr15	99481110	-	0.880159	0.89688	-0.0167203	-0.0268475	0.00159061	0.942172	0.784435	0.0342695	0.949522	0.79897	0.0319919	0	0.676224	195423	0	0
592653	cg01779679	chr16	87857222	-	0.951303	0.956533	-0.00523036	-0.0078283	0.00159632	0.973486	0.898759	0.0125089	0.980081	0.937036	0.0099273	0	0.676927	368843	0	0
635712	cg12319795	chr18	9771821	-	0.320646	0.29526	0.0253861	0.115249	0.00159722	0.586841	0.126324	0.0858602	0.57374	0.13613	0.0881138	0	0.676927	28417	0	0
427731	cg23391889	chr11	44349464	-	0.640236	0.658579	-0.0183432	-0.0401351	0.001598	0.829756	0.435394	0.0980343	0.824927	0.499042	0.0785455	0	0.676927	144514	0	0
49088	cg06215798	chr1	164743113	+	0.963994	0.966318	-0.00232327	-0.00343717	0.00159845	0.978327	0.940434	0.00855006	0.978843	0.947268	0.00801826	0	0.676927	502725	0	0
233989	cg16080814	chr5	170053232	+	0.820019	0.837308	-0.0172888	-0.0297418	0.00159852	0.900632	0.703049	0.0401434	0.905503	0.724219	0.039579	0	0.676927	182601	0	0
414838	cg04878902	chr11	617778	-	0.900838	0.911924	-0.0110855	-0.0174526	0.00159887	0.945108	0.840052	0.0224788	0.948071	0.881528	0.0171199	0	0.676927	250994	0	0
42924	cg10343375	chr1	151458349	-	0.970091	0.971842	-0.00175089	-0.00257501	0.00159928	0.984894	0.948942	0.00776696	0.989473	0.947866	0.00853149	0	0.676927	546365	0	0
553787	cg27552679	chr15	74425757	+	0.119589	0.111037	0.00855186	0.0984934	0.00159973	0.26287	0.0447509	0.0339601	0.18955	0.0585192	0.0314863	0	0.676927	104656	0	0
645273	cg10016752	chr18	73130463	+	0.965807	0.969626	-0.00381876	-0.00563488	0.0016019	0.983286	0.943141	0.00890999	0.981579	0.956257	0.00631516	0	0.677332	422102	0	0
724515	cg24141339	chr22	50891204	+	0.771163	0.796361	-0.0251984	-0.0458029	0.00160256	0.859551	0.684316	0.0443039	0.889293	0.711093	0.040389	0	0.677332	127745	0	0
62620	cg09658739	chr1	221910617	-	0.935085	0.938917	-0.00383204	-0.00583788	0.00160441	0.962031	0.905394	0.0119126	0.959894	0.914535	0.00953623	0	0.677344	416174	0	0
551977	cg09626887	chr15	69659681	+	0.956233	0.959763	-0.00352967	-0.00526059	0.00160445	0.975152	0.927611	0.00998097	0.983559	0.932351	0.0117037	0	0.677344	433505	0	0
17786	cg23354802	chr1	30170611	-	0.905965	0.915231	-0.0092653	-0.01452	0.00161248	0.951802	0.837266	0.0201218	0.949446	0.869648	0.0212046	0	0.680333	276210	0	0
387892	cg09051246	chr10	34854975	+	0.939939	0.944581	-0.00464161	-0.00703216	0.0016149	0.963587	0.905522	0.0123828	0.966998	0.924606	0.0123837	0	0.68096	386049	0	0
235863	cg18371750	chr5	175112799	-	0.959659	0.964235	-0.00457594	-0.00679225	0.00161642	0.978196	0.942839	0.00759723	0.977738	0.950734	0.0074083	0	0.681204	391627	0	0
439505	cg27442307	chr11	70347868	+	0.904129	0.912303	-0.00817351	-0.0128423	0.00161848	0.945555	0.858019	0.0191359	0.94683	0.881536	0.0148182	0	0.681378	293752	0	0
148435	cg15939396	chr3	111289875	-	0.929792	0.937946	-0.00815395	-0.0124633	0.00161871	0.956574	0.893712	0.0138413	0.957998	0.91506	0.0108958	0	0.681378	298027	0	0
151142	cg16033921	chr3	123254110	-	0.974609	0.977982	-0.00337304	-0.00493389	0.00162138	0.985664	0.955787	0.00625167	0.988315	0.965376	0.00580348	0	0.681873	444090	0	0
137712	cg12688043	chr3	48129944	+	0.0136853	0.0162853	-0.00260003	-0.150266	0.00162187	0.0293382	0.00466735	0.00476894	0.0356377	0.00650843	0.00567295	0	0.681873	330768	0	0
267650	cg05360004	chr6	91218634	+	0.940091	0.943044	-0.00295328	-0.00447754	0.00162271	0.961907	0.909902	0.0106524	0.965971	0.915439	0.012367	0	0.681873	460100	0	0
44377	cg25536111	chr1	154232097	-	0.979229	0.975599	0.00363049	0.00530446	0.00162515	0.991716	0.959448	0.00641641	0.989884	0.959746	0.00681351	0	0.682502	432119	0	0
517411	cg04993592	chr14	35761922	-	0.0187592	0.0173774	0.00138184	0.0710402	0.00162675	0.0313108	0.0111859	0.0035368	0.02524	0.0103659	0.00393798	0	0.682778	463353	0	0
641354	cg20012977	chr18	47688392	+	0.885845	0.91082	-0.0249755	-0.0396708	0.0016286	0.964478	0.702281	0.0575707	0.953894	0.784358	0.034636	0	0.683137	146064	0	0
56633	cg26455554	chr1	201971805	+	0.960469	0.963228	-0.00275975	-0.00409682	0.00162987	0.981429	0.941861	0.00810124	0.980399	0.945267	0.00935208	0	0.683137	474457	0	0
119971	cg01413054	chr2	231658979	-	0.283936	0.360528	-0.0765915	-0.334079	0.00163043	0.578667	0.0776111	0.102035	0.647009	0.182158	0.0958653	0	0.683137	1730	0	0
47489	cg18876457	chr1	160071037	+	0.0334428	0.0382792	-0.00483645	-0.152286	0.00163425	0.0591803	0.0155479	0.00920694	0.0595894	0.0209662	0.0100424	0	0.683216	202492	0	0
290712	cg01564803	chr7	13845911	-	0.887675	0.897361	-0.00968614	-0.0154836	0.00163478	0.940437	0.811626	0.0247289	0.934147	0.843484	0.0191882	0	0.683216	267315	0	0
719435	cg22304285	chr22	41634744	-	0.897302	0.904881	-0.00757943	-0.0120019	0.00163507	0.934193	0.861655	0.0170128	0.931367	0.869244	0.0188237	0	0.683216	303481	0	0
531933	cg22257585	chr14	95057197	-	0.913551	0.919274	-0.00572341	-0.00891305	0.00163531	0.944035	0.879654	0.0115387	0.938766	0.900606	0.00931811	0	0.683216	348573	0	0
177812	cg13621396	chr4	26861261	-	0.871366	0.845939	0.0254268	0.0422329	0.00163685	0.948058	0.718782	0.0489684	0.909228	0.739933	0.0497249	0	0.683216	138090	0	0
499453	cg25578773	chr13	37247048	+	0.857308	0.871242	-0.0139348	-0.0229951	0.00163735	0.940013	0.713425	0.0432238	0.926139	0.785012	0.0351053	0	0.683216	215171	0	0
663901	cg04856470	chr19	33745760	+	0.883981	0.890735	-0.00675426	-0.010859	0.00163754	0.927396	0.82748	0.0194671	0.924057	0.856633	0.0175842	0	0.683216	318191	0	0
413676	cg14099938	chr10	135038107	-	0.954251	0.960106	-0.00585477	-0.00873331	0.00163816	0.982073	0.894875	0.0158136	0.978823	0.921821	0.0113394	0	0.683216	351701	0	0
211529	cg06426248	chr5	59815420	-	0.948493	0.956846	-0.0083522	-0.012517	0.00164115	0.975346	0.896139	0.014325	0.97963	0.931784	0.0108322	0	0.683246	297408	0	0
592429	cg04509526	chr16	87679579	-	0.934067	0.941741	-0.00767438	-0.0116803	0.00164171	0.962631	0.894521	0.0124257	0.969362	0.922498	0.0129951	0	0.683246	307471	0	0
393609	cg12630070	chr10	72080498	+	0.860682	0.875333	-0.0146513	-0.0240749	0.00164181	0.913392	0.805981	0.0223359	0.918751	0.826075	0.0220283	0	0.683246	209211	0	0
550503	cg14118450	chr15	66155653	-	0.962767	0.965506	-0.00273816	-0.00405522	0.001642	0.980843	0.937404	0.00883925	0.983556	0.947843	0.00930834	0	0.683246	476103	0	0
265917	cg13624704	chr6	80284660	+	0.914053	0.921875	-0.00782219	-0.0121611	0.00164566	0.966247	0.822862	0.0253249	0.966381	0.876745	0.0187433	0	0.684139	301605	0	0
248733	cg06122864	chr6	29629187	-	0.740853	0.694882	0.0459714	0.0911494	0.00164639	0.898066	0.413748	0.093121	0.877235	0.460749	0.104184	0	0.684139	48153	0	0
439940	cg14917557	chr11	70998074	+	0.565026	0.516071	0.0489546	0.128369	0.00164752	0.793361	0.249683	0.100626	0.762891	0.276402	0.102118	0	0.684139	21541	0	0
433221	cg20421360	chr11	63303828	+	0.845608	0.822777	0.0228309	0.0390195	0.00164792	0.913057	0.720788	0.0380169	0.895568	0.67013	0.0459389	0	0.684139	148163	0	0
675113	cg24790297	chr19	51226357	-	0.423043	0.396418	0.026625	0.0915459	0.00164896	0.647002	0.208159	0.0795529	0.597435	0.225215	0.0803927	0	0.684178	47717	0	0
107893	cg00936853	chr2	173671353	+	0.0129943	0.0154442	-0.00244993	-0.146062	0.00165042	0.0287549	0.00256658	0.00579682	0.0329785	0.00244888	0.00695387	0	0.684233	343477	0	0
411914	cg01118730	chr10	133767507	+	0.956694	0.959158	-0.00246393	-0.00367249	0.00165098	0.979948	0.937997	0.00887063	0.976448	0.938865	0.0103285	0	0.684233	492096	0	0
246780	cg05142576	chr6	27114781	-	0.00367855	0.00429767	-0.000619113	-0.0638641	0.00165805	0.00796089	0.000964824	0.00158496	0.00938584	0.00169189	0.0017301	0	0.685904	592940	0	0
456947	cg13079837	chr12	1104452	+	0.931034	0.934699	-0.00366457	-0.00560723	0.00166087	0.958415	0.890167	0.0114686	0.952519	0.910941	0.0124489	0	0.685904	422952	0	0
333722	cg25371169	chr8	38757772	-	0.0452125	0.0421723	0.00304024	0.081712	0.00166116	0.0729383	0.025317	0.00982819	0.0683427	0.0267805	0.00974587	0	0.685904	297412	0	0
440272	cg08966189	chr11	71823395	+	0.0159658	0.0181408	-0.00217497	-0.116049	0.00166122	0.0350425	0.00418249	0.00551124	0.0380159	0.00761448	0.00646343	0	0.685904	369316	0	0
319568	cg07132585	chr7	151550030	+	0.918667	0.925192	-0.00652571	-0.0101023	0.00166157	0.956495	0.848329	0.0190734	0.94875	0.892	0.01298	0	0.685904	329195	0	0
27539	cg14142689	chr1	53609657	-	0.936526	0.941978	-0.00545247	-0.00828681	0.00166553	0.970865	0.880327	0.0182912	0.969719	0.891157	0.0172221	0	0.685904	359943	0	0
18276	cg17163976	chr1	31820915	+	0.918109	0.926095	-0.00798578	-0.0123604	0.00166588	0.950835	0.844922	0.0161117	0.948314	0.894012	0.0143059	0	0.685904	299224	0	0
204950	cg24839593	chr5	13175911	-	0.874767	0.879675	-0.00490783	-0.00798056	0.00166721	0.910104	0.839661	0.0168056	0.90284	0.850085	0.0165667	0	0.685904	365891	0	0
106982	cg25085500	chr2	170597890	+	0.959219	0.963606	-0.00438734	-0.00651588	0.00166808	0.977677	0.937116	0.00978283	0.983733	0.947294	0.00870094	0	0.685904	398416	0	0
307085	cg20030852	chr7	99391506	-	0.933565	0.919462	0.0141021	0.0217247	0.00166894	0.985787	0.830457	0.0309043	0.970952	0.789404	0.0409382	0	0.685904	222575	0	0
545012	cg22459814	chr15	45491484	+	0.0146518	0.0174125	-0.0027607	-0.153141	0.00167045	0.0292569	0.00459395	0.00421028	0.0268028	0.0077255	0.00485335	0	0.685904	317809	0	0
17623	cg22284828	chr1	29562746	-	0.0959097	0.0796661	0.0162436	0.2402	0.00167181	0.21043	0.0428837	0.0293067	0.165499	0.0342704	0.0267904	0	0.685904	33558	0	0
709555	cg12941550	chr22	18300472	-	0.94665	0.954738	-0.0080881	-0.0121462	0.00167214	0.973361	0.909632	0.011778	0.983111	0.922979	0.013528	0	0.685904	301771	0	0
224148	cg08206318	chr5	134363637	+	0.184365	0.156548	0.0278173	0.222833	0.00167252	0.412983	0.083433	0.0676557	0.280412	0.0962084	0.0485602	0	0.685904	8207	0	0
264479	cg20316949	chr6	66382341	-	0.917335	0.921175	-0.00384053	-0.00596254	0.00167366	0.947696	0.874534	0.0159725	0.956932	0.886008	0.0180204	0	0.685904	412774	0	0
402698	cg17535691	chr10	102881324	-	0.0178432	0.0215142	-0.00367103	-0.178679	0.00167411	0.0517501	0.00672042	0.00880824	0.0527682	0.00841788	0.0120323	0	0.685904	257522	0	0
311803	cg13161961	chr7	120970240	+	0.0311111	0.0342559	-0.00314482	-0.106342	0.00167662	0.0630741	0.0100999	0.00948524	0.0543144	0.0102273	0.00995652	0	0.685904	290210	0	0
273175	cg20233814	chr6	129810953	-	0.64807	0.622542	0.0255284	0.0570807	0.00167768	0.809239	0.479736	0.0678482	0.739646	0.493606	0.0645696	0	0.685904	100049	0	0
211612	cg18613288	chr5	60213144	+	0.94941	0.954026	-0.00461595	-0.0069245	0.00167773	0.970307	0.913526	0.0117156	0.973393	0.934783	0.00994727	0	0.685904	388509	0	0
486990	cg25364861	chr12	117477481	-	0.977362	0.979457	-0.00209529	-0.00305831	0.00168302	0.989799	0.960849	0.00547887	0.988692	0.967819	0.00517042	0	0.685904	520817	0	0
24122	cg17737314	chr1	44114355	-	0.107433	0.123125	-0.0156916	-0.180939	0.00168333	0.28631	0.0220069	0.0525519	0.231084	0.0395126	0.0447777	0	0.685904	36146	0	0
267369	cg16304097	chr6	90276732	+	0.974	0.977067	-0.00306645	-0.00448889	0.00168451	0.986335	0.952758	0.00672243	0.988136	0.963379	0.00611018	0	0.685904	459681	0	0
152401	cg00795382	chr3	126748200	-	0.894032	0.900047	-0.00601484	-0.00956696	0.00168528	0.935507	0.827604	0.0206445	0.935293	0.860637	0.0183457	0	0.685904	337573	0	0
166295	cg11702543	chr3	189518075	-	0.860069	0.84048	0.0195886	0.0328519	0.00168558	0.936841	0.709383	0.0443791	0.896171	0.672175	0.0510469	0	0.685904	169946	0	0
551421	cg26925546	chr15	68293523	+	0.9251	0.932152	-0.00705218	-0.0108394	0.00168619	0.95388	0.89132	0.0119928	0.954942	0.914218	0.0115514	0	0.685904	318487	0	0
678925	cg03526224	chr19	57989117	-	0.0257365	0.0285691	-0.00283269	-0.11005	0.00168692	0.0945205	0.0116699	0.0104656	0.0820531	0.0112537	0.0126365	0	0.685904	312413	0	0
649229	cg12588082	chr19	1940412	-	0.0588337	0.0558721	0.00296162	0.063448	0.00168707	0.0961369	0.0340234	0.0120618	0.086594	0.0304473	0.0139393	0	0.685904	302887	0	0
292784	cg14436487	chr7	25065444	+	0.873853	0.878151	-0.00429726	-0.00699733	0.0016882	0.929662	0.797059	0.0265605	0.923637	0.75175	0.0351539	0	0.685904	386879	0	0
65268	cg06778363	chr1	229208186	-	0.831069	0.847498	-0.0164282	-0.0279078	0.00168839	0.910209	0.726655	0.0353977	0.885409	0.768154	0.0299955	0	0.685904	190494	0	0
517525	cg02814278	chr14	36231173	-	0.976748	0.980049	-0.00330111	-0.00481841	0.00168898	0.990878	0.958966	0.00675962	0.99105	0.963728	0.00762242	0	0.685904	447926	0	0
562927	cg07388848	chr15	101869560	+	0.970217	0.973709	-0.00349203	-0.00513048	0.0016892	0.987498	0.947215	0.00802787	0.98574	0.96027	0.00671343	0	0.685904	437619	0	0
9350	cg16911819	chr1	14105506	-	0.941088	0.944801	-0.0037125	-0.00562049	0.00168924	0.964173	0.914559	0.0103917	0.963529	0.925095	0.00867107	0	0.685904	422570	0	0
201912	cg03107473	chr5	1402702	+	0.915314	0.896665	0.0186498	0.0293747	0.00169142	0.959176	0.815686	0.0263119	0.946268	0.789333	0.0332596	0	0.685904	184117	0	0
585814	cg14876183	chr16	70819699	+	0.930797	0.934049	-0.00325272	-0.00497939	0.00169371	0.958685	0.877547	0.0145768	0.958207	0.896863	0.0132547	0	0.685904	442629	0	0
365707	cg18697856	chr9	100396069	+	0.0368468	0.033115	0.00373182	0.119761	0.00169377	0.0612132	0.0220965	0.00785485	0.0464005	0.0196397	0.00736269	0	0.685904	254094	0	0
549685	cg15736359	chr15	64439522	-	0.954772	0.959081	-0.00430929	-0.00642966	0.0016947	0.972588	0.932076	0.0082099	0.971473	0.946458	0.00725222	0	0.685904	400511	0	0
604170	cg24947985	chr17	16557942	+	0.923586	0.890664	0.032922	0.0517939	0.00169626	0.985383	0.728092	0.0502606	0.968789	0.686971	0.0744094	0	0.685904	112157	0	0
648387	cg26174454	chr19	1304930	-	0.824118	0.832795	-0.00867711	-0.0149304	0.00169723	0.882944	0.773745	0.0203915	0.880002	0.795712	0.019186	0	0.685904	272400	0	0
194192	cg13152819	chr4	152682222	-	0.011487	0.0121675	-0.000680477	-0.0449804	0.00169759	0.0219348	0.00429932	0.00333267	0.0221317	0.00534606	0.00407854	0	0.685904	581010	0	0
227742	cg07268068	chr5	141348550	-	0.01332	0.0163151	-0.00299514	-0.174325	0.00169838	0.0290271	0.00123125	0.00577287	0.0323261	0.0052613	0.00666073	0	0.685904	300557	0	0
628904	cg13777759	chr17	77134081	+	0.87776	0.893331	-0.0155716	-0.025086	0.00169931	0.950481	0.6898	0.0506017	0.956837	0.785569	0.0360726	0	0.685904	204011	0	0
280057	cg25249492	chr6	159273623	-	0.897487	0.908407	-0.0109202	-0.0172569	0.00170023	0.937526	0.852879	0.0172917	0.935887	0.876471	0.0152769	0	0.685904	252532	0	0
173649	cg03179312	chr4	6614660	-	0.931258	0.937422	-0.00616453	-0.00941777	0.00170171	0.955773	0.907166	0.0101719	0.953273	0.917669	0.0084252	0	0.685904	340034	0	0
571098	cg01329687	chr16	11761803	+	0.295351	0.277481	0.0178702	0.0870029	0.00170326	0.456069	0.1682	0.0486988	0.367534	0.167812	0.0446618	0	0.685904	52606	0	0
647956	cg11015549	chr19	1026207	+	0.0230401	0.0194677	0.00357231	0.165079	0.0017038	0.045613	0.00791949	0.00720823	0.0325181	0.01103	0.0061953	0	0.685904	263279	0	0
541185	cg27624178	chr15	34393959	+	0.0205815	0.0241158	-0.00353426	-0.157779	0.00170612	0.0324291	0.0111754	0.00428467	0.034186	0.0170865	0.00499757	0	0.685904	265407	0	0
133425	cg02341182	chr3	33480109	-	0.0650651	0.0790902	-0.0140251	-0.247124	0.00170615	0.120353	0.0379127	0.0189412	0.124953	0.0437275	0.0213324	0	0.685904	45673	0	0
41519	cg00198102	chr1	145576003	-	0.0381766	0.0403165	-0.0021399	-0.062699	0.00170744	0.0643113	0.0151403	0.00911161	0.0592122	0.0208198	0.00728001	0	0.685904	372902	0	0
623605	cg05237828	chr17	67323976	+	0.0254796	0.0339892	-0.00850965	-0.310162	0.00170943	0.108509	0.00655494	0.0157922	0.120044	0.0142278	0.0243495	0	0.685904	105378	0	0
473741	cg16164619	chr12	57871855	+	0.0126124	0.0147777	-0.00216527	-0.131927	0.00170975	0.0229914	0.00603377	0.00335047	0.024292	0.00693589	0.00432414	0	0.685904	370237	0	0
122350	cg09480515	chr2	237033375	-	0.97059	0.973778	-0.00318836	-0.00468327	0.00171163	0.988336	0.946192	0.00819578	0.991437	0.95483	0.00848247	0	0.685904	452724	0	0
260675	cg03959445	chr6	42852280	-	0.974402	0.977047	-0.00264496	-0.00387114	0.00171217	0.988542	0.956898	0.00670225	0.989854	0.96451	0.00655281	0	0.685904	483670	0	0
240373	cg14462067	chr6	3158207	+	0.046148	0.055249	-0.00910101	-0.216721	0.00171354	0.0780364	0.0241777	0.0107986	0.113453	0.0336137	0.0159407	0	0.685904	95719	0	0
330049	cg20966378	chr8	24199149	+	0.919168	0.928915	-0.00974721	-0.0150554	0.00171363	0.967344	0.851804	0.0260493	0.97035	0.853603	0.0247629	0	0.685904	271298	0	0
36445	cg12909559	chr1	100435310	+	0.0265838	0.0312127	-0.00462896	-0.171886	0.00171499	0.0452546	0.0106789	0.00766539	0.0507795	0.0164792	0.0078346	0	0.685904	211107	0	0
396002	cg11532418	chr10	78647178	+	0.893303	0.901817	-0.00851448	-0.0135351	0.00171565	0.935244	0.843675	0.0200087	0.934215	0.846138	0.018935	0	0.685904	286162	0	0
550863	cg18349625	chr15	66977635	-	0.925447	0.93445	-0.00900313	-0.0138187	0.00171846	0.967763	0.834723	0.0255918	0.974998	0.890742	0.020412	0	0.685904	283250	0	0
653076	cg10169026	chr19	6002617	-	0.901946	0.913395	-0.0114495	-0.0180002	0.0017186	0.948258	0.759911	0.0252458	0.952651	0.876982	0.0226611	0	0.685904	246839	0	0
471982	cg26787915	chr12	54936840	+	0.977635	0.974012	0.00362323	0.0053024	0.00171917	0.990422	0.960848	0.00657582	0.986204	0.947481	0.00846396	0	0.685904	432188	0	0
42487	cg15441434	chr1	150898392	+	0.197294	0.169667	0.0276276	0.206357	0.00171941	0.39787	0.0526378	0.0800623	0.288162	0.0575754	0.0694747	0	0.685904	8352	0	0
692945	cg14774045	chr20	46130592	+	0.0448878	0.0413999	0.00348794	0.094721	0.00172069	0.0666254	0.0267593	0.00818026	0.0569815	0.0245086	0.00640155	0	0.685904	268250	0	0
187112	cg06158944	chr4	99182422	-	0.00846827	0.00937251	-0.000904237	-0.068962	0.0017208	0.0162303	0.00219245	0.00295365	0.0213949	0.00318127	0.00354303	0	0.685904	539665	0	0
223630	cg09039647	chr5	133304495	-	0.0215307	0.0250531	-0.00352235	-0.152783	0.00172167	0.0552094	0.00507722	0.0085449	0.0390358	0.00882207	0.00726692	0	0.685904	266145	0	0
649112	cg21201285	chr19	1847690	-	0.018914	0.0219473	-0.00303324	-0.143923	0.00172291	0.0337747	0.0116001	0.00424368	0.0334343	0.0138229	0.00475228	0	0.685904	297877	0	0
148620	cg14092328	chr3	111752393	+	0.93782	0.942773	-0.00495337	-0.00751999	0.00172455	0.965494	0.903991	0.0125871	0.966197	0.913294	0.0118085	0	0.685904	375396	0	0
211466	cg05995159	chr5	59325256	-	0.951643	0.957894	-0.00625166	-0.00934863	0.00172484	0.973542	0.920081	0.0103513	0.974081	0.935072	0.00880604	0	0.685904	341144	0	0
375364	cg14157170	chr9	136747711	+	0.94808	0.950017	-0.00193724	-0.00291419	0.00172502	0.970654	0.920054	0.00949837	0.970684	0.930693	0.0102562	0	0.685904	528169	0	0
510636	cg02166450	chr13	112712795	+	0.0718005	0.0687737	0.00302675	0.0543947	0.00172555	0.152892	0.0288393	0.0185174	0.131687	0.03674	0.0180873	0	0.685904	298358	0	0
163670	cg22878357	chr3	182834013	+	0.0148142	0.0167531	-0.00193894	-0.108542	0.00172677	0.0247896	0.00599979	0.00423918	0.0324868	0.00794667	0.00564464	0	0.685904	393713	0	0
542630	cg10360467	chr15	40532541	+	0.913127	0.919601	-0.00647394	-0.0100824	0.0017278	0.954062	0.845141	0.0191883	0.948395	0.874959	0.0177644	0	0.685904	329493	0	0
416220	cg01135259	chr11	1674211	+	0.181226	0.21845	-0.037224	-0.2566	0.0017279	0.314952	0.0752625	0.0510896	0.340614	0.110028	0.0595197	0	0.685904	3089	0	0
198376	cg09859947	chr4	184098416	-	0.851729	0.868651	-0.0169221	-0.0280562	0.00172883	0.920255	0.741016	0.035371	0.931775	0.775041	0.0324999	0	0.685904	189833	0	0
50813	cg19641284	chr1	171451938	+	0.963632	0.957282	0.00635057	0.00944088	0.00173031	0.983077	0.93032	0.00982125	0.976817	0.920852	0.0118666	0	0.685904	339653	0	0
559928	cg10345131	chr15	91475918	-	0.112128	0.104577	0.00755181	0.0920864	0.00173169	0.143719	0.0779344	0.0130272	0.130168	0.0751308	0.0133137	0	0.685904	123513	0	0
686154	cg05491754	chr20	25728844	-	0.912092	0.931285	-0.0191929	-0.0297208	0.00173198	0.961024	0.816507	0.0295481	0.975115	0.870501	0.0233052	0	0.685904	182673	0	0
495260	cg10560060	chr13	20764054	-	0.927233	0.920334	0.00689899	0.010659	0.00173207	0.967257	0.877445	0.0188316	0.951291	0.884626	0.0183994	0	0.685904	321072	0	0
292770	cg06348136	chr7	25019998	-	0.0185843	0.021398	-0.00281371	-0.13545	0.00173223	0.0396512	0.00785882	0.00625653	0.0320745	0.00712588	0.0052045	0	0.685904	313807	0	0
6953	cg00562879	chr1	9307378	-	0.938616	0.942566	-0.00394982	-0.00599458	0.00173238	0.968297	0.902898	0.012528	0.964563	0.923439	0.0125946	0	0.685904	411894	0	0
114178	cg09646896	chr2	206942524	-	0.966923	0.970738	-0.00381524	-0.00562328	0.00173421	0.979892	0.95179	0.00626018	0.98256	0.95413	0.00670488	0	0.685904	422474	0	0
142125	cg11984586	chr3	57651926	-	0.972097	0.97358	-0.00148325	-0.00217724	0.00173482	0.984822	0.954567	0.00625422	0.985377	0.962223	0.00609335	0	0.685904	569387	0	0
158071	cg04927429	chr3	149531388	-	0.0218103	0.0248846	-0.0030743	-0.133096	0.0017353	0.0478024	0.00825889	0.00699236	0.0429011	0.0106759	0.00810464	0	0.685904	295024	0	0
582772	cg06121900	chr16	66416551	+	0.874282	0.886418	-0.0121355	-0.0196643	0.00173572	0.932043	0.789712	0.0290877	0.936242	0.833893	0.0230559	0	0.685904	235380	0	0
43938	cg10242122	chr1	153604075	-	0.866281	0.877415	-0.0111337	-0.0182149	0.00173701	0.933838	0.777376	0.0354592	0.943106	0.801409	0.0326951	0	0.685904	245254	0	0
379498	cg03743191	chr10	1258225	+	0.875611	0.859098	0.016513	0.0271543	0.00173871	0.962036	0.698063	0.052905	0.926497	0.687355	0.0567867	0	0.685904	193961	0	0
283688	cg24148518	chr6	169967648	+	0.93337	0.93741	-0.00403984	-0.00616494	0.00174447	0.958448	0.904344	0.0126005	0.95796	0.90971	0.0100913	0	0.685904	407400	0	0
569834	cg04971446	chr16	8348340	+	0.956794	0.961609	-0.00481528	-0.00716775	0.00174483	0.980446	0.907624	0.0126096	0.975823	0.939971	0.009331	0	0.685904	382980	0	0
71990	cg12836057	chr2	3158592	+	0.957189	0.960045	-0.00285594	-0.00425374	0.00174667	0.97344	0.924857	0.00840218	0.972989	0.9384	0.00873913	0	0.685904	468405	0	0
242036	cg17336569	chr6	8106561	+	0.961387	0.965657	-0.00426939	-0.00632696	0.00174691	0.977849	0.935663	0.00744189	0.979886	0.951876	0.00643809	0	0.685904	403171	0	0
186668	cg11982583	chr4	93225933	-	0.0169763	0.0187003	-0.001724	-0.0893736	0.00174785	0.0552065	0.00431062	0.00869713	0.038746	0.0079222	0.00701542	0	0.685904	418574	0	0
70629	cg03230215	chr2	282889	-	0.967047	0.96996	-0.00291338	-0.00429547	0.00174809	0.98366	0.94469	0.00804491	0.98555	0.954228	0.00738187	0	0.685904	466800	0	0
425393	cg08976874	chr11	31885698	-	0.825907	0.844601	-0.0186943	-0.0319091	0.0017497	0.946239	0.517095	0.0806954	0.929382	0.68113	0.0659201	0	0.685904	173662	0	0
89021	cg14288567	chr2	70994960	+	0.0128075	0.015015	-0.00220752	-0.133287	0.00175123	0.0326542	0.00383323	0.00485327	0.027799	0.00905531	0.00449481	0	0.685904	366200	0	0
448944	cg08653158	chr11	114655164	+	0.931913	0.943758	-0.0118449	-0.0180293	0.00175279	0.975672	0.777628	0.0384775	0.980636	0.884537	0.0192295	0	0.685904	246620	0	0
155099	cg23093151	chr3	134755785	-	0.811411	0.790938	0.0204728	0.0364133	0.00175301	0.881994	0.713169	0.0378054	0.859983	0.662617	0.0445816	0	0.685904	156842	0	0
152586	cg24289380	chr3	127207185	-	0.912295	0.922855	-0.0105599	-0.0164244	0.00175374	0.961353	0.819333	0.027276	0.954467	0.839305	0.0249768	0	0.685904	259192	0	0
385671	cg13572780	chr10	24792697	-	0.0512494	0.0641067	-0.0128573	-0.274909	0.00175411	0.143498	0.0148524	0.0239314	0.146485	0.0263134	0.0327289	0	0.685904	54126	0	0
34997	cg15714328	chr1	92907297	-	0.837537	0.852049	-0.0145122	-0.0244938	0.00175446	0.88499	0.78371	0.0228665	0.898326	0.805748	0.0230489	0	0.685904	207078	0	0
248620	cg18004110	chr6	29589729	+	0.771059	0.791478	-0.0204193	-0.0372318	0.00175573	0.890629	0.647283	0.0475265	0.877977	0.686001	0.0426449	0	0.685904	154107	0	0
20156	cg13209712	chr1	35660588	+	0.843342	0.854373	-0.0110311	-0.0185302	0.00175849	0.906417	0.767769	0.032165	0.915265	0.770319	0.0397581	0	0.685904	243072	0	0
65570	cg23142297	chr1	230021889	-	0.932046	0.938666	-0.00662058	-0.0101036	0.00176032	0.962028	0.8928	0.0126741	0.959172	0.917613	0.0107415	0	0.685904	329179	0	0
501991	cg21814667	chr13	48877568	+	0.0121656	0.0134265	-0.00126094	-0.0798212	0.00176081	0.0212853	0.00566367	0.00326746	0.0236124	0.00735157	0.00338056	0	0.685904	481140	0	0
420843	cg07684214	chr11	10339408	+	0.911444	0.918479	-0.00703461	-0.0109722	0.00176182	0.961178	0.825215	0.0266046	0.95061	0.833558	0.0258237	0	0.685904	316669	0	0
623037	cg13148085	chr17	65242711	-	0.126983	0.11751	0.00947304	0.103387	0.00176189	0.253469	0.048865	0.0396572	0.2158	0.0571953	0.0384492	0	0.685904	90138	0	0
311620	cg19150007	chr7	119915076	-	0.935117	0.937962	-0.00284533	-0.00433679	0.00176402	0.959965	0.898937	0.012964	0.963028	0.909811	0.0111145	0	0.685904	465206	0	0
854	cg17709975	chr1	1248492	+	0.940849	0.946245	-0.00539556	-0.00816338	0.00176448	0.964349	0.905296	0.0100883	0.969961	0.924931	0.0101576	0	0.685904	362305	0	0
489771	cg18619541	chr12	123459241	+	0.0131426	0.0150805	-0.00193789	-0.116015	0.00176481	0.0246714	0.00532852	0.0037269	0.0250123	0.0069612	0.00454194	0	0.685904	393834	0	0
658590	cg21235950	chr19	14496535	+	0.185549	0.180349	0.00520067	0.0388882	0.00176535	0.317557	0.11626	0.0385701	0.25464	0.12947	0.0354078	0	0.685904	188684	0	0
593038	cg04471589	chr16	88493773	+	0.878217	0.88643	-0.00821306	-0.0132788	0.00176597	0.914951	0.818671	0.0185099	0.909054	0.854259	0.0160832	0	0.685904	288910	0	0
481478	cg21847378	chr12	102811121	+	0.948201	0.955699	-0.00749781	-0.011245	0.00176647	0.973868	0.905875	0.0139857	0.975614	0.935223	0.0105904	0	0.685904	313037	0	0
269987	cg01304950	chr6	109416612	-	0.0111365	0.0128772	-0.00174068	-0.114173	0.00176648	0.0221458	0.00414661	0.00378455	0.0272584	0.00545505	0.00458541	0	0.685904	416575	0	0
75616	cg08147001	chr2	15948683	+	0.92593	0.929076	-0.00314629	-0.00484174	0.00176652	0.971791	0.849019	0.0237659	0.960918	0.844913	0.025735	0	0.685904	447148	0	0
579908	cg18381420	chr16	53491450	+	0.689263	0.702169	-0.0129056	-0.0263836	0.00176674	0.818941	0.554137	0.0551335	0.813209	0.513453	0.0615159	0	0.685904	197536	0	0
290509	cg06286300	chr7	12250161	-	0.00859128	0.0102979	-0.00170662	-0.126704	0.00176751	0.0233849	0.00152219	0.00387862	0.020495	0.00325089	0.00407432	0	0.685904	420737	0	0
487293	cg16391752	chr12	118481253	-	0.961521	0.964996	-0.00347574	-0.00515222	0.00176886	0.982737	0.936651	0.00872907	0.984614	0.948285	0.00843867	0	0.685904	436894	0	0
250051	cg24372586	chr6	30520094	-	0.949386	0.952429	-0.00304285	-0.0045685	0.00176955	0.971065	0.913572	0.0104416	0.973499	0.934093	0.0109808	0	0.685904	456774	0	0
577794	cg01215328	chr16	34208792	+	0.886883	0.896609	-0.00972591	-0.0155605	0.00176969	0.939107	0.835801	0.0217913	0.923872	0.860773	0.0195837	0	0.685904	266633	0	0
507564	cg23748125	chr13	100278804	-	0.967685	0.970205	-0.00251994	-0.0037137	0.00177051	0.982945	0.950165	0.00756079	0.984481	0.948789	0.00767853	0	0.685904	490349	0	0
471447	cg03215137	chr12	54393687	-	0.0852007	0.116276	-0.0310755	-0.407539	0.00177078	0.227285	0.0355546	0.034334	0.307738	0.0579169	0.0593134	0	0.685904	5672	0	0
348018	cg20202430	chr8	124545061	-	0.979416	0.975705	0.00371043	0.00542046	0.00177198	0.992167	0.961807	0.00608704	0.989	0.955553	0.00858326	0	0.685904	428575	0	0
198315	cg04535496	chr4	183859433	-	0.0110412	0.013919	-0.00287781	-0.184941	0.00177209	0.0204684	0.00492812	0.00315594	0.0242308	0.00647414	0.00409774	0	0.685904	308991	0	0
556010	cg18432286	chr15	79120806	-	0.955388	0.958746	-0.00335882	-0.00501077	0.00177352	0.977889	0.927022	0.00981355	0.978333	0.935308	0.00906881	0	0.685904	441531	0	0
330569	cg00704695	chr8	26278680	-	0.973801	0.978188	-0.00438714	-0.00641922	0.0017749	0.991133	0.950458	0.00801532	0.991108	0.961277	0.00777255	0	0.685904	400767	0	0
422317	cg24706275	chr11	14926472	+	0.01505	0.0134179	0.00163214	0.0972013	0.00177509	0.0263686	0.00720557	0.00344848	0.0191996	0.00743687	0.00271461	0	0.685904	429942	0	0
264312	cg11680027	chr6	63921394	-	0.938563	0.942166	-0.00360345	-0.00547021	0.00177543	0.963692	0.906327	0.0126168	0.963732	0.910485	0.0124994	0	0.685904	427046	0	0
688156	cg08210727	chr20	33865349	-	0.0882224	0.0846316	0.00359085	0.0537308	0.00177784	0.113933	0.0567447	0.0122449	0.105145	0.056446	0.0119063	0	0.685904	262164	0	0
47617	cg19680222	chr1	160253463	+	0.945003	0.951276	-0.00627335	-0.00944598	0.00177832	0.966709	0.922728	0.00925932	0.968995	0.933988	0.00940412	0	0.685904	339578	0	0
497922	cg11231563	chr13	30278927	-	0.649083	0.673523	-0.0244402	-0.0525301	0.0017784	0.829052	0.429434	0.0728775	0.785416	0.437105	0.0725551	0	0.685904	110361	0	0
180292	cg15075638	chr4	47814806	-	0.907532	0.914568	-0.00703543	-0.0110201	0.00177929	0.955528	0.827495	0.023317	0.946778	0.859577	0.0201619	0	0.685904	316032	0	0
46597	cg00353407	chr1	156974025	-	0.96589	0.969537	-0.00364691	-0.00538131	0.00178105	0.984228	0.944237	0.00761982	0.986292	0.95423	0.00715626	0	0.685904	429718	0	0
558077	cg22435267	chr15	86312163	-	0.954372	0.959455	-0.00508262	-0.0075836	0.00178134	0.97601	0.921667	0.0110065	0.982939	0.93881	0.0104463	0	0.685904	374071	0	0
494325	cg24462656	chr12	133156510	-	0.967104	0.972685	-0.0055818	-0.00821808	0.00178176	0.988066	0.943912	0.00893493	0.991611	0.955212	0.00876639	0	0.685904	361257	0	0
76310	cg06393263	chr2	19745124	+	0.908681	0.889876	0.0188055	0.0298386	0.00178258	0.964957	0.828205	0.0286614	0.943938	0.768616	0.0427943	0	0.685904	182190	0	0
41969	cg20523987	chr1	149890289	-	0.498843	0.482029	0.0168137	0.0484764	0.00178345	0.629399	0.394176	0.0483401	0.612391	0.335693	0.0552799	0	0.685904	120459	0	0
349157	cg26299953	chr8	128305282	-	0.885887	0.897765	-0.0118779	-0.019002	0.00178362	0.946912	0.783537	0.0335135	0.955284	0.854709	0.0228248	0	0.685904	239827	0	0
662776	cg02942594	chr19	28284741	-	0.0127661	0.0163806	-0.00361451	-0.212591	0.0017851	0.0301643	0.00565944	0.00447384	0.0450087	0.00820266	0.00706101	0	0.685904	260825	0	0
503428	cg12008054	chr13	53740191	+	0.823541	0.837637	-0.0140961	-0.0241935	0.00178686	0.897741	0.698299	0.0372554	0.88576	0.771069	0.0293106	0	0.685904	208588	0	0
251770	cg21467614	chr6	31543638	+	0.0994534	0.0922211	0.00723234	0.0986243	0.0017873	0.182403	0.0592487	0.0220602	0.135776	0.0468888	0.020473	0	0.685904	130453	0	0
159304	cg11002227	chr3	155588016	+	0.0332275	0.0304574	0.00277007	0.0955446	0.00178865	0.0511772	0.0198045	0.00690059	0.0493835	0.0166306	0.00685538	0	0.685904	317061	0	0
179891	cg05603881	chr4	42401149	-	0.0254307	0.0286192	-0.00318854	-0.12432	0.00178923	0.101155	0.00908127	0.0150427	0.0576575	0.012124	0.0107116	0	0.685904	287193	0	0
356629	cg02553654	chr9	4387128	+	0.842931	0.84667	-0.00373903	-0.00631059	0.00178997	0.92888	0.689731	0.0337038	0.916466	0.736581	0.0334626	0	0.685904	403603	0	0
605344	cg01136380	chr17	18874685	-	0.96234	0.966009	-0.00366852	-0.00543287	0.00179079	0.981889	0.925933	0.00930816	0.980191	0.951339	0.00676649	0	0.685904	428184	0	0
693099	cg22202490	chr20	46577360	-	0.949101	0.954433	-0.00533127	-0.00799717	0.00179289	0.97355	0.923387	0.010228	0.975041	0.925121	0.0115343	0	0.685904	365572	0	0
82766	cg00968638	chr2	43450965	+	0.0110918	0.0123909	-0.00129915	-0.0862336	0.00179348	0.0221734	0.00438037	0.00366081	0.0233764	0.004513	0.00440891	0	0.685904	475426	0	0
12545	cg10550982	chr1	20758218	+	0.256451	0.233263	0.0231876	0.131351	0.00179356	0.587135	0.0646071	0.10453	0.446181	0.0657868	0.0998007	0	0.685904	20322	0	0
453626	cg09760666	chr11	125775128	-	0.913507	0.918042	-0.00453522	-0.00706755	0.00179483	0.946224	0.824683	0.0206897	0.953391	0.88907	0.0151138	0	0.685904	385236	0	0
336694	cg11862779	chr8	56757013	+	0.0183162	0.0202332	-0.00191701	-0.0945063	0.00179686	0.0455896	0.00946895	0.00532641	0.0309881	0.0112504	0.00490257	0	0.685904	396084	0	0
429541	cg00113051	chr11	47587410	+	0.0240113	0.0224482	0.00156312	0.0678768	0.00179725	0.0349031	0.0138272	0.00445323	0.0322339	0.0151026	0.00413335	0	0.685904	438758	0	0
365238	cg14234105	chr9	98550966	+	0.864165	0.875035	-0.0108699	-0.0178288	0.00179728	0.923595	0.729894	0.0353293	0.935444	0.781734	0.0353206	0	0.685904	248101	0	0
689180	cg14510641	chr20	35879597	+	0.912881	0.918554	-0.00567207	-0.00883974	0.00179758	0.948703	0.867564	0.0182763	0.955934	0.890234	0.018009	0	0.685904	349879	0	0
198407	cg14472584	chr4	184186934	-	0.935768	0.944242	-0.00847332	-0.0128678	0.00179878	0.978065	0.831341	0.0274218	0.980131	0.871054	0.0233554	0	0.685904	293455	0	0
625189	cg06624832	chr17	72772340	-	0.0202503	0.0225031	-0.00225276	-0.103626	0.00180042	0.0327311	0.0101129	0.00503988	0.0362337	0.0134222	0.0058616	0	0.685904	361756	0	0
664286	cg02167097	chr19	34791424	-	0.94834	0.952041	-0.00370117	-0.00556105	0.00180136	0.970874	0.917045	0.0101273	0.966806	0.931673	0.00741007	0	0.685904	424345	0	0
695101	cg17763346	chr20	52529242	-	0.976659	0.979413	-0.00275352	-0.0040206	0.00180198	0.989172	0.953712	0.00757422	0.98883	0.962167	0.0067523	0	0.685904	477535	0	0
53370	cg16330697	chr1	182559596	-	0.936658	0.943427	-0.0067692	-0.0102795	0.00180222	0.96222	0.908119	0.0108295	0.965666	0.923928	0.0115427	0	0.685904	326514	0	0
368431	cg16510793	chr9	116450346	+	0.0762532	0.0707511	0.00550216	0.095097	0.00180248	0.16111	0.039709	0.0207204	0.112621	0.041066	0.0184423	0	0.685904	178136	0	0
497770	cg13910526	chr13	29528053	-	0.625386	0.577194	0.0481919	0.113796	0.00180396	0.822285	0.332871	0.105091	0.745067	0.289693	0.0878428	0	0.685904	29331	0	0
345561	cg07873443	chr8	107709762	+	0.961617	0.965439	-0.00382227	-0.00566433	0.00180426	0.98129	0.938815	0.00934615	0.981543	0.940514	0.00978715	0	0.685904	421243	0	0
377931	cg21174903	chr9	140147188	+	0.902611	0.909841	-0.00723001	-0.0113845	0.00180452	0.950823	0.839654	0.0244435	0.958121	0.8505	0.026103	0	0.685904	311193	0	0
650432	cg15043720	chr19	3047355	+	0.013033	0.0153141	-0.00228115	-0.136242	0.0018064	0.028024	0.00285946	0.0052174	0.0273629	0.00326048	0.00721998	0	0.686059	359067	0	0
360213	cg08121090	chr9	36190785	+	0.00913224	0.0117348	-0.00260259	-0.184003	0.00180803	0.0213467	0.00306624	0.003702	0.0252954	0.00539483	0.0048838	0	0.686059	330543	0	0
698626	cg13203507	chr20	61447442	+	0.198233	0.186505	0.0117287	0.0836379	0.00180807	0.347496	0.118539	0.0434798	0.254498	0.101689	0.0407366	0	0.686059	63676	0	0
543752	cg24938123	chr15	42224307	+	0.96423	0.967796	-0.0035652	-0.00526991	0.00180872	0.981185	0.940884	0.00759085	0.978865	0.949865	0.00700998	0	0.686059	433207	0	0
75500	cg01198655	chr2	15403576	-	0.973022	0.975296	-0.00227356	-0.00333286	0.00181237	0.986738	0.955701	0.00705702	0.986954	0.96078	0.00689603	0	0.686601	507643	0	0
61717	cg23273333	chr1	217262889	-	0.027429	0.0341289	-0.0066999	-0.237567	0.00181342	0.0615059	0.00629905	0.0116149	0.0731918	0.013515	0.0120273	0	0.686601	143132	0	0
101727	cg24439232	chr2	134241989	-	0.836585	0.850984	-0.014399	-0.0243315	0.00181412	0.939227	0.632781	0.0611017	0.938754	0.702703	0.0515046	0	0.686601	207894	0	0
392029	cg06811101	chr10	64070369	+	0.932024	0.935282	-0.00325788	-0.00498078	0.00181591	0.958861	0.897449	0.0126902	0.957971	0.907928	0.0117404	0	0.686601	442565	0	0
511519	cg22088587	chr13	113588120	+	0.861377	0.870638	-0.00926043	-0.0152511	0.00181684	0.904254	0.802358	0.0211645	0.912306	0.823494	0.023819	0	0.686601	269414	0	0
172542	cg05639690	chr4	3749615	-	0.467139	0.522366	-0.0552277	-0.158011	0.00181734	0.723017	0.22278	0.095225	0.750838	0.335964	0.0995771	0	0.686601	11516	0	0
718101	cg03178411	chr22	38970180	+	0.953316	0.958586	-0.00527005	-0.00787109	0.00181815	0.977957	0.923525	0.0113786	0.982767	0.929045	0.0128528	0	0.686601	368009	0	0
442599	cg04664643	chr11	76882431	-	0.954343	0.956862	-0.00251851	-0.00376288	0.001819	0.977882	0.932747	0.00885171	0.976521	0.936963	0.00987133	0	0.686601	488221	0	0
422786	cg22869372	chr11	17041463	+	0.91125	0.920018	-0.00876727	-0.0136648	0.00181923	0.95556	0.818646	0.024575	0.963485	0.848721	0.0249734	0	0.686601	284763	0	0
537092	cg03188238	chr14	104775469	+	0.96303	0.966308	-0.00327722	-0.00485091	0.00182071	0.977343	0.945989	0.00711861	0.977293	0.950395	0.00574816	0	0.686601	446859	0	0
246005	cg12898892	chr6	25625393	-	0.869439	0.883244	-0.013805	-0.0224708	0.00182077	0.940802	0.763936	0.0311313	0.948305	0.809822	0.0287282	0	0.686601	218110	0	0
168448	cg05979682	chr3	196192494	-	0.975932	0.971897	0.00403491	0.00591632	0.00182151	0.989689	0.95545	0.00705509	0.987747	0.955377	0.00860867	0	0.686601	414046	0	0
608544	cg22264251	chr17	30807785	-	0.969725	0.975657	-0.0059315	-0.00870809	0.00182302	0.987351	0.935198	0.00967944	0.987745	0.955679	0.00785515	0	0.686718	352158	0	0
587607	cg16042568	chr16	75788367	-	0.919827	0.926221	-0.00639431	-0.00988728	0.00182441	0.958046	0.869245	0.016755	0.952759	0.887208	0.0164948	0	0.686718	332503	0	0
654296	cg26321464	chr19	7968588	-	0.0109539	0.0129248	-0.00197087	-0.129689	0.00182466	0.0234851	0.00289	0.00454628	0.0264319	0.00429195	0.0053905	0	0.686718	390313	0	0
76522	cg10953326	chr2	20391930	+	0.915917	0.924957	-0.00904007	-0.0140173	0.00182607	0.946005	0.870791	0.0158052	0.946021	0.890402	0.0138757	0	0.686891	281145	0	0
8953	cg01250490	chr1	12251718	-	0.973534	0.977021	-0.00348726	-0.00510624	0.00182925	0.99162	0.931404	0.0107761	0.990879	0.945317	0.0112312	0	0.687055	438417	0	0
489808	cg16651334	chr12	123465094	-	0.0176874	0.0207017	-0.00301428	-0.149088	0.00182962	0.0331378	0.00498099	0.00653979	0.0343799	0.00233638	0.00702922	0	0.687055	299233	0	0
706195	cg13879523	chr21	44088948	-	0.908138	0.914991	-0.00685241	-0.0107274	0.00183168	0.933456	0.878638	0.0129854	0.940203	0.896468	0.0120215	0	0.687055	320104	0	0
30234	cg02283366	chr1	63785544	+	0.0599849	0.06492	-0.00493501	-0.0983055	0.00183203	0.120949	0.02579	0.0214557	0.120583	0.0290038	0.0191857	0	0.687055	198663	0	0
442547	cg13471701	chr11	76821076	-	0.954882	0.959005	-0.00412343	-0.00615224	0.00183243	0.972275	0.9297	0.00856087	0.972789	0.945972	0.0075206	0	0.687055	407720	0	0
465644	cg10988144	chr12	32831975	+	0.0118466	0.0134353	-0.00158869	-0.101274	0.00183283	0.022614	0.00552705	0.00335833	0.0249247	0.00767857	0.00371526	0	0.687055	435539	0	0
172993	cg14074285	chr4	4868908	-	0.0372584	0.043533	-0.00627456	-0.179857	0.00183398	0.0713139	0.0153743	0.0105548	0.103615	0.0259678	0.0143108	0	0.687055	154530	0	0
354662	cg24023418	chr8	144918163	-	0.906083	0.911111	-0.00502762	-0.00789611	0.00183409	0.943034	0.873652	0.0140341	0.946417	0.882455	0.015585	0	0.687055	367473	0	0
192100	cg23741509	chr4	140375847	+	0.0286208	0.0322111	-0.0035903	-0.128245	0.00183614	0.050089	0.0162875	0.0059853	0.0518323	0.0196369	0.00646193	0	0.687088	262187	0	0
260039	cg10719970	chr6	41529932	-	0.895958	0.900485	-0.00452633	-0.00719002	0.00183734	0.930709	0.828411	0.0153293	0.941559	0.866452	0.0176702	0	0.687088	382482	0	0
30434	cg07203817	chr1	64300033	+	0.951595	0.957151	-0.00555573	-0.00831136	0.00183764	0.97663	0.915781	0.0119218	0.977336	0.926788	0.0116862	0	0.687088	359528	0	0
716295	cg15159234	chr22	36335229	-	0.944091	0.94983	-0.00573906	-0.00865212	0.00183797	0.972314	0.900801	0.0143884	0.97693	0.898555	0.0144976	0	0.687088	353168	0	0
349514	cg24613135	chr8	129253074	-	0.820986	0.798463	0.0225238	0.0396438	0.00184002	0.930595	0.665698	0.0606748	0.89619	0.635976	0.0642966	0	0.687501	146142	0	0
374410	cg17246894	chr9	134903640	-	0.911368	0.918203	-0.00683507	-0.010663	0.00184341	0.946252	0.861774	0.0176539	0.939444	0.896688	0.0122814	0	0.688129	321009	0	0
478949	cg11659475	chr12	91597712	-	0.643426	0.603029	0.0403971	0.0920689	0.00184429	0.839301	0.385278	0.0879345	0.743921	0.334078	0.0940715	0	0.688129	47178	0	0
650491	cg18505103	chr19	3115035	+	0.983041	0.981143	0.0018982	0.00276036	0.00184482	0.989445	0.976313	0.00314899	0.986385	0.969675	0.00375957	0	0.688129	536237	0	0
553383	cg01211349	chr15	73661769	-	0.0349674	0.0316586	0.00330883	0.110266	0.0018455	0.0594406	0.0180412	0.0077386	0.05	0.0181236	0.00733924	0	0.688129	279389	0	0
303492	cg04574286	chr7	80108304	-	0.925337	0.910915	0.0144217	0.0224178	0.00184787	0.970781	0.845905	0.0239556	0.963801	0.795878	0.0349823	0	0.688279	218390	0	0
563394	cg07938281	chr16	326083	+	0.0695876	0.0549126	0.014675	0.294045	0.00184911	0.168773	0.0246727	0.0324912	0.112514	0.0137042	0.0210077	0	0.688279	41698	0	0
179580	cg27319662	chr4	41415813	+	0.00601167	0.00632426	-0.000312593	-0.0278941	0.0018499	0.0114401	0.00216365	0.00193647	0.0108068	0.00253303	0.00198081	0	0.688279	656157	0	0
378460	cg10491092	chr9	140916330	-	0.937773	0.94199	-0.0042171	-0.00640501	0.00185039	0.970115	0.881414	0.0133722	0.968867	0.909664	0.0127141	0	0.688279	401151	0	0
274399	cg08119576	chr6	135251409	+	0.953182	0.955043	-0.00186124	-0.00278515	0.00185065	0.974392	0.922536	0.0104058	0.97487	0.934963	0.0103398	0	0.688279	534950	0	0
597614	cg05995697	chr17	2378520	+	0.967021	0.971742	-0.00472153	-0.00695514	0.00185181	0.981555	0.943408	0.00849473	0.984405	0.954419	0.00715134	0	0.688358	387835	0	0
97579	cg06875437	chr2	113029579	-	0.954441	0.958547	-0.00410589	-0.00612891	0.0018531	0.979491	0.912739	0.0144266	0.982914	0.915595	0.0141984	0	0.688482	408353	0	0
532759	cg15248293	chr14	96928326	-	0.821145	0.833221	-0.0120767	-0.0208118	0.00185571	0.897732	0.720567	0.0349368	0.896413	0.747714	0.0356024	0	0.68855	228031	0	0
506242	cg00181054	chr13	95254340	-	0.0135749	0.0122349	0.00133991	0.0844204	0.00185583	0.0267825	0.0068307	0.00291608	0.017694	0.0065941	0.00259578	0	0.68855	469393	0	0
625550	cg17532016	chr17	73100288	+	0.933136	0.937138	-0.00400189	-0.00610866	0.00185731	0.959165	0.900879	0.0109484	0.957974	0.909301	0.0115887	0	0.68855	408906	0	0
303024	cg08651611	chr7	76832226	-	0.85859	0.877595	-0.0190043	-0.031225	0.00185775	0.939787	0.720418	0.0433665	0.942653	0.774897	0.0372626	0	0.68855	176513	0	0
293151	cg13757081	chr7	26480747	-	0.961996	0.963175	-0.00117875	-0.00174851	0.00185803	0.98088	0.937172	0.00947178	0.979415	0.943529	0.00862015	0	0.68855	596665	0	0
629879	cg20784345	chr17	78256929	+	0.905801	0.913323	-0.00752221	-0.0118016	0.00186183	0.94924	0.85587	0.0188618	0.948365	0.875339	0.0170044	0	0.688941	305962	0	0
702439	cg25908198	chr21	33976787	+	0.94539	0.950433	-0.00504341	-0.00759582	0.00186312	0.967489	0.914476	0.00979098	0.968573	0.926487	0.0104095	0	0.688941	373793	0	0
572434	cg24284534	chr16	17469851	-	0.34261	0.336381	0.00622898	0.0257135	0.00186424	0.6179	0.200348	0.0692426	0.571114	0.224008	0.0714555	0	0.688941	200820	0	0
123785	cg20995748	chr2	239900143	+	0.930388	0.93427	-0.00388212	-0.0059435	0.00186458	0.974055	0.817509	0.0280797	0.972762	0.859821	0.0260589	0	0.688941	413303	0	0
484788	cg03770217	chr12	111805938	-	0.305133	0.296614	0.00851882	0.0395364	0.00186475	0.436079	0.232585	0.0360923	0.413837	0.237354	0.041607	0	0.688941	146480	0	0
319911	cg17296660	chr7	153111194	+	0.918042	0.936762	-0.0187195	-0.0288109	0.00186479	0.974132	0.766963	0.0468289	0.968273	0.818215	0.0338045	0	0.688941	186509	0	0
67415	cg00242242	chr1	235716901	-	0.981487	0.983138	-0.0016504	-0.00239948	0.00186745	0.9917	0.961894	0.00580703	0.99123	0.969853	0.00544344	0	0.689102	556280	0	0
151229	cg08436494	chr3	123432275	-	0.909035	0.916885	-0.00784958	-0.0122699	0.00186788	0.945785	0.868843	0.0163104	0.945853	0.876406	0.0159829	0	0.689102	300274	0	0
103878	cg01939895	chr2	151422311	-	0.959122	0.963167	-0.00404451	-0.00600838	0.00186912	0.980463	0.906191	0.0123426	0.980965	0.946898	0.00866291	0	0.689102	411529	0	0
626390	cg07204711	chr17	74001139	-	0.933316	0.924915	0.00840022	0.0129047	0.00187111	0.967629	0.873178	0.019414	0.961306	0.847561	0.022195	0	0.689102	293015	0	0
367362	cg14987585	chr9	111931022	-	0.95636	0.963809	-0.00744857	-0.0110774	0.00187205	0.976854	0.919741	0.0123801	0.982756	0.94648	0.0109936	0	0.689102	315286	0	0
76520	cg08580870	chr2	20387826	+	0.938445	0.943256	-0.0048104	-0.00729869	0.00187292	0.963078	0.908037	0.0125146	0.964517	0.920323	0.0110135	0	0.689102	380165	0	0
244240	cg21374672	chr6	16324968	+	0.956989	0.946071	0.0109176	0.0163812	0.00187542	0.981789	0.922438	0.0126233	0.975473	0.885971	0.0177115	0	0.689102	259583	0	0
248305	cg22180958	chr6	29055509	+	0.635496	0.573913	0.0615828	0.144654	0.00187631	0.78362	0.433637	0.0748144	0.707093	0.341191	0.0949727	0	0.689102	15318	0	0
598166	cg26289012	chr17	3540036	-	0.0613449	0.057196	0.00414891	0.0864352	0.00187665	0.0825186	0.0392117	0.00885546	0.0769606	0.0359421	0.0092995	0	0.689102	232617	0	0
221099	cg11948516	chr5	121725927	+	0.909675	0.916297	-0.00662236	-0.0103513	0.00187892	0.942397	0.85997	0.018311	0.946364	0.880034	0.0157605	0	0.689102	325412	0	0
519724	cg10991486	chr14	52379675	+	0.966325	0.968196	-0.00187098	-0.00276206	0.00187929	0.980802	0.944189	0.00701824	0.98487	0.952595	0.00702253	0	0.689102	536143	0	0
674449	cg18596952	chr19	50354230	+	0.0189055	0.0205456	-0.00164012	-0.0796212	0.00187956	0.0621913	0.00341102	0.00886812	0.0371317	0.0105373	0.00660667	0	0.689102	428927	0	0
229844	cg08692354	chr5	149538695	+	0.864847	0.876668	-0.0118217	-0.0193644	0.00188027	0.926507	0.789251	0.0324889	0.922778	0.783127	0.031332	0	0.689102	237386	0	0
371495	cg13718943	chr9	129487184	-	0.973246	0.97546	-0.00221402	-0.00324493	0.00188042	0.985979	0.956777	0.00582949	0.985511	0.959644	0.00597597	0	0.689102	511758	0	0
100332	cg02917683	chr2	128137769	-	0.935359	0.937123	-0.00176447	-0.00269022	0.00188099	0.971023	0.871189	0.020817	0.966794	0.859146	0.0235672	0	0.689102	539982	0	0
171523	cg05347334	chr4	2439397	+	0.945612	0.950874	-0.00526251	-0.00792306	0.00188135	0.966553	0.921705	0.0105735	0.97155	0.927788	0.00962285	0	0.689102	366962	0	0
382219	cg16346803	chr10	8949979	-	0.946475	0.953358	-0.00688337	-0.0103453	0.00188138	0.971852	0.900264	0.0124217	0.976438	0.937091	0.0107048	0	0.689102	325521	0	0
152727	cg11011888	chr3	127391696	-	0.0820751	0.0780287	0.00404636	0.0648364	0.00188586	0.112735	0.0539313	0.0115502	0.125313	0.0533421	0.0146985	0	0.689697	237716	0	0
528163	cg06779847	chr14	77687015	-	0.584354	0.562531	0.021823	0.0539686	0.00188612	0.77113	0.387145	0.0906323	0.727355	0.386385	0.0941762	0	0.689697	107011	0	0
573768	cg03713642	chr16	22825100	-	0.0872861	0.105968	-0.0186821	-0.253424	0.00188796	0.190956	0.0329575	0.0287712	0.241957	0.0391188	0.0454854	0	0.689697	24206	0	0
636768	cg25957701	chr18	13419019	+	0.975693	0.97741	-0.00171735	-0.00251138	0.00189048	0.987894	0.953539	0.0064194	0.989885	0.967893	0.00560673	0	0.689697	549948	0	0
532463	cg03096273	chr14	96240760	+	0.0238156	0.0267078	-0.00289221	-0.118398	0.00189307	0.0459959	0.00926742	0.00790432	0.0472671	0.0121641	0.00915236	0	0.689697	307905	0	0
641359	cg24771840	chr18	47717446	+	0.680461	0.648967	0.0314942	0.0673541	0.00189342	0.8021	0.450385	0.0811824	0.780977	0.396638	0.0919621	0	0.689697	80451	0	0
472173	cg10672482	chr12	55725839	-	0.901499	0.875946	0.0255537	0.0410234	0.00189409	0.96418	0.710255	0.0482224	0.953531	0.724057	0.0516032	0	0.689697	141775	0	0
601930	cg05694744	chr17	8191820	+	0.0314054	0.0351697	-0.00376432	-0.125537	0.00189409	0.0491727	0.0154513	0.00704867	0.0602486	0.0203852	0.00867652	0	0.689697	252268	0	0
716779	cg21209356	chr22	37319042	+	0.915282	0.928118	-0.0128358	-0.0198759	0.0018944	0.962674	0.850116	0.0271346	0.968778	0.865399	0.024925	0	0.689697	233997	0	0
673408	cg15085603	chr19	49250252	+	0.0183654	0.0211855	-0.0028201	-0.136743	0.00189463	0.0429737	0.00711715	0.00532463	0.0556575	0.00821603	0.00815598	0	0.689697	313347	0	0
672996	cg25633119	chr19	48894926	+	0.0247794	0.0292503	-0.00447083	-0.174468	0.00189491	0.0795449	0.00831839	0.00884743	0.0620868	0.00988073	0.0117085	0	0.689697	217905	0	0
642102	cg01396957	chr18	53168132	-	0.867533	0.884096	-0.0165634	-0.0269769	0.00189529	0.940641	0.775677	0.0375544	0.938121	0.760902	0.0354454	0	0.689697	194822	0	0
170205	cg16118592	chr4	1148569	+	0.771078	0.785238	-0.0141596	-0.0259193	0.00189538	0.850306	0.637236	0.0476288	0.842039	0.664704	0.0418036	0	0.689697	199784	0	0
702915	cg24536394	chr21	34915885	+	0.00867786	0.0104105	-0.00173268	-0.127985	0.00189682	0.0153429	0.00375293	0.0023882	0.0142884	0.00480032	0.00228942	0	0.689874	417532	0	0
706524	cg05274953	chr21	44589163	+	0.942717	0.948155	-0.00543826	-0.00821172	0.00189895	0.964238	0.901596	0.0116648	0.97008	0.932055	0.0113135	0	0.690305	361402	0	0
143841	cg11597605	chr3	66304918	+	0.837887	0.863132	-0.0252454	-0.0423285	0.00190063	0.933837	0.599998	0.0528537	0.938929	0.74118	0.040353	0	0.690567	137815	0	0
232853	cg11534707	chr5	162888040	+	0.0132195	0.0150293	-0.00180975	-0.108278	0.00190231	0.0252936	0.00615366	0.00356906	0.0258562	0.00635663	0.0044389	0	0.690585	408356	0	0
493148	cg17236365	chr12	132232597	-	0.934088	0.942915	-0.00882776	-0.0134273	0.00190516	0.968102	0.871257	0.0157491	0.971941	0.898379	0.0159422	0	0.690585	287279	0	0
164241	cg23762779	chr3	183948800	+	0.0435536	0.0507434	-0.00718981	-0.181744	0.00190596	0.0858494	0.0229663	0.0107788	0.0865907	0.0286832	0.0144779	0	0.690585	131414	0	0
[truncated: 722,858+ more rows]
