# Supplementary material for: Metformin use history and genome-wide DNA methylation profile: potential molecular mechanism for aging and longevity
Source: Aging (Albany NY). 2023 Feb 2;15(3):601–16. doi: 10.18632/aging.204498 (PMC9970305; doi:10.18632/aging.204498)
Supplement: Supplementary Table 2 [file aging-15-204498-s002.xlsx]

## Sheet: Supplementary Table 2
Supplementary Table 2. Differential methylation table for between metformin users and nonusers among diabetes group.
id	cgid	Chromosome	Start	Strand	mean.0	mean.1	mean.diff	mean.quot.log2	diffmeth.p.val	max.0	min.0	sd.0	max.1	min.1	sd.1	min.diff	diffmeth.p.adj.fdr	combinedRank	num.na.0	num.na.1
409753	cg19873536	chr10	116475283	-	0.783424	0.679093	0.104332	0.203394	1.27855e-06	0.881651	0.619809	0.0804228	0.873947	0.366111	0.103644	0	0.8359	27372	0	0
362830	cg13596208	chr9	35603605	+	0.0187808	0.0274471	-0.00866636	-0.37975	2.29055e-06	0.0443509	0.0063706	0.00964024	0.0564277	0.00589818	0.0132935	0	0.8359	180458	0	0
567665	cg01704105	chr16	225666	+	0.40521	0.337213	0.0679968	0.258019	5.41528e-06	0.548737	0.267532	0.0710766	0.531975	0.190885	0.0826994	0	0.915406	14515	0	0
549176	cg02550961	chr15	45406866	+	0.0153701	0.019429	-0.00405888	-0.214108	6.10236e-06	0.0302461	0.00438277	0.00740987	0.0368259	0.00607646	0.0068324	0	0.915406	329509	0	0
557626	cg12516231	chr15	73373867	+	0.0224556	0.0315788	-0.00912316	-0.357379	6.97322e-06	0.0433374	0.0107294	0.00949837	0.102967	0.0130435	0.0147234	0	0.915406	171392	0	0
294848	cg06685724	chr7	23720386	-	0.0211842	0.0290799	-0.00789571	-0.325611	1.28132e-05	0.0412816	0.00690589	0.00975523	0.0667362	0.0055321	0.014056	0	0.915406	197552	0	0
572609	cg00484396	chr16	3507460	+	0.0976941	0.0492379	0.0484562	0.862347	1.56313e-05	0.204856	0.0243269	0.0465663	0.147076	0.0133427	0.0324797	0	0.915406	4292	0	0
208612	cg14685975	chr5	33240872	-	0.898646	0.920778	-0.0221323	-0.0347192	1.63929e-05	0.9355	0.809694	0.0311116	0.962353	0.868471	0.0205684	0	0.915406	217208	0	0
366221	cg02104500	chr9	90340593	+	0.0359868	0.0494952	-0.0135084	-0.371554	1.66219e-05	0.0734745	0.0218719	0.0118456	0.106499	0.027777	0.0182469	0	0.915406	108048	0	0
378298	cg12584257	chr9	136475163	+	0.67575	0.772224	-0.0964744	-0.1899	1.68728e-05	0.869871	0.523909	0.102986	0.938437	0.602941	0.0801141	0	0.915406	31774	0	0
572611	cg22508957	chr16	3507546	-	0.109086	0.0628102	0.0462762	0.709796	1.84259e-05	0.220078	0.0272868	0.0444629	0.128285	0.0198183	0.0307042	0	0.915406	5170	0	0
531016	cg11034672	chr14	75151321	+	0.116448	0.149655	-0.0332075	-0.336419	1.8552e-05	0.298657	0.0259204	0.0731873	0.48632	0.0326193	0.0846876	0	0.915406	17758	0	0
384802	cg24651265	chr10	6962135	-	0.0111046	0.0165245	-0.0054199	-0.329767	2.11539e-05	0.0225521	0.0024388	0.0057803	0.0372822	0.000751428	0.00794221	0	0.915406	270357	0	0
205972	cg17467873	chr5	10307544	-	0.0171389	0.0209637	-0.00382485	-0.190218	2.20606e-05	0.0510872	0.00264614	0.0111575	0.0439772	0.00355017	0.00972028	0	0.915406	341740	0	0
685873	cg05857996	chr20	2675418	+	0.775703	0.63647	0.139233	0.281401	2.22547e-05	0.930159	0.359308	0.111457	0.885436	0.343183	0.138827	0	0.915406	11083	0	0
114813	cg18482666	chr2	206520809	-	0.957973	0.948355	0.00961741	0.0144058	2.38556e-05	0.974863	0.937919	0.00995697	0.97095	0.918326	0.0117781	0	0.915406	340503	0	0
436747	cg00489394	chr11	63259326	+	0.065929	0.071033	-0.00510396	-0.0938577	2.39749e-05	0.219157	0.0110977	0.0438266	0.15576	0.0332992	0.0270479	0	0.915406	282598	0	0
562253	cg21530087	chr15	85923759	+	0.0221062	0.0261358	-0.0040296	-0.170577	2.58747e-05	0.0407465	0.00968117	0.00756929	0.0460602	0.0126773	0.00663494	0	0.915406	331058	0	0
159260	cg15864571	chr3	149966904	-	0.934435	0.950363	-0.0159276	-0.0241277	2.67033e-05	0.960525	0.912563	0.0137727	0.973289	0.895168	0.0156695	0	0.915406	265139	0	0
359311	cg15981195	chr9	2623146	-	0.0234259	0.0345341	-0.0111082	-0.413943	2.90751e-05	0.0459004	0.0045394	0.00924114	0.0638438	0.0171513	0.0115163	0	0.915406	137995	0	0
71102	cg03468249	chr2	290317	-	0.0171507	0.0277712	-0.0106205	-0.476298	3.19289e-05	0.0309059	0.00291513	0.00743595	0.145896	0.00997493	0.0215759	0	0.915406	145350	0	0
140001	cg05424356	chr3	49941240	+	0.0160571	0.0217359	-0.00567878	-0.284438	3.19377e-05	0.0269463	0.00717417	0.00481464	0.0331973	0.0139804	0.00548779	0	0.915406	260959	0	0
432170	cg27609217	chr11	46258039	+	0.136926	0.185303	-0.0483774	-0.410627	3.37091e-05	0.286303	0.0395099	0.0775177	0.566366	0.0446715	0.0967222	0	0.915406	4326	0	0
314841	cg14225039	chr7	123916407	-	0.620112	0.533731	0.0863808	0.212715	3.37178e-05	0.807141	0.360563	0.116927	0.790393	0.16946	0.131049	0	0.915406	24662	0	0
319647	cg14031363	chr7	142700023	+	0.783556	0.718932	0.064624	0.122548	3.42473e-05	0.926715	0.560093	0.0899953	0.844268	0.588093	0.0737121	0	0.915406	67671	0	0
114754	cg25598781	chr2	206004753	-	0.0789314	0.116004	-0.0370723	-0.502701	3.62527e-05	0.152493	0.0232956	0.0354977	0.375376	0.0400889	0.0731975	0	0.915406	12219	0	0
149643	cg26315918	chr3	111793950	-	0.0753337	0.129313	-0.0539798	-0.707148	3.84818e-05	0.249951	0.0240312	0.0571273	0.333913	0.0290274	0.0947077	0	0.915406	2746	0	0
545352	cg16453259	chr15	34014349	-	0.00648452	0.00830172	-0.0018172	-0.150867	4.10086e-05	0.0132276	0.00223902	0.00291761	0.0160711	0.00144186	0.00356464	0	0.915406	492598	0	0
539544	cg20752298	chr14	102304871	-	0.974259	0.965358	0.00890159	0.013107	4.18418e-05	0.992514	0.954763	0.00879014	0.985795	0.939907	0.0108195	0	0.915406	355176	0	0
243216	cg07480006	chr6	6247012	+	0.170855	0.243348	-0.072493	-0.486287	4.41262e-05	0.234425	0.101603	0.0405161	0.34635	0.0818528	0.0569568	0	0.915406	993	0	0
409935	cg25039498	chr10	118015561	+	0.785494	0.691921	0.0935736	0.180544	4.42693e-05	0.914398	0.656066	0.0802009	0.875152	0.523937	0.0894652	0	0.915406	35143	0	0
572610	cg21433313	chr16	3507492	+	0.0761354	0.0374924	0.0386431	0.858911	4.54475e-05	0.169768	0.0195668	0.0371222	0.0982994	0.0173099	0.0183526	0	0.915406	10526	0	0
514410	cg15400367	chr13	112171862	+	0.734445	0.695267	0.0391775	0.0779946	4.54609e-05	0.85062	0.5724	0.0723017	0.810618	0.572819	0.0563802	0	0.915406	117598	0	0
677082	cg15047610	chr19	47750787	-	0.0392464	0.0567537	-0.0175072	-0.438828	4.65593e-05	0.0711629	0.0140004	0.016009	0.134043	0.0219961	0.0212398	0	0.915406	74110	0	0
388832	cg19706697	chr10	24746103	+	0.455417	0.379062	0.0763553	0.258525	4.7977e-05	0.621468	0.268143	0.0869746	0.525526	0.221017	0.0711008	0	0.915406	14421	0	0
106588	cg21931839	chr2	163200302	-	0.058079	0.0755704	-0.0174914	-0.329902	4.94197e-05	0.169637	0.0255917	0.0291062	0.177866	0.0291417	0.0295059	0	0.915406	74230	0	0
447635	cg25266959	chr11	85780846	-	0.0180879	0.0276088	-0.00952093	-0.421123	5.07665e-05	0.0467747	0.00558767	0.00960437	0.062782	0.00899748	0.0129455	0	0.915406	163909	0	0
390255	cg11198398	chr10	31054241	+	0.659976	0.473073	0.186902	0.471867	5.27405e-05	0.845552	0.224625	0.178426	0.87494	0.162265	0.166812	0	0.915406	1156	0	0
153475	cg20038252	chr3	126854933	+	0.113596	0.153722	-0.0401261	-0.405616	5.45544e-05	0.258861	0.0374128	0.0487017	0.473848	0.0649954	0.0749574	0	0.915406	9096	0	0
94502	cg06698844	chr2	98281400	+	0.706733	0.65236	0.0543731	0.11382	5.59155e-05	0.793552	0.56697	0.0587901	0.793205	0.416248	0.0885133	0	0.915406	74948	0	0
369318	cg13349030	chr9	102668649	+	0.021366	0.024499	-0.00313297	-0.137352	5.92569e-05	0.0416711	0.00674221	0.00894573	0.0402231	0.0123161	0.00710144	0	0.915406	383294	0	0
108608	cg00936853	chr2	173671353	+	0.0119064	0.01698	-0.00507357	-0.300537	6.06726e-05	0.0244588	0.00233632	0.00683187	0.0383097	0.000358048	0.00869328	0	0.915406	283850	0	0
20939	cg02483735	chr1	37051530	-	0.739927	0.80365	-0.0637238	-0.11766	6.22447e-05	0.910934	0.380409	0.121486	0.93348	0.623588	0.0709569	0	0.915406	71604	0	0
59887	cg06899483	chr1	208037215	+	0.602857	0.569148	0.0337096	0.0816198	6.43033e-05	0.66735	0.512569	0.0395013	0.750547	0.452705	0.075834	0	0.915406	112216	0	0
12606	cg10550982	chr1	20758218	+	0.322672	0.24346	0.0792122	0.392343	6.50911e-05	0.765507	0.109527	0.147872	0.481604	0.0592671	0.108023	0	0.915406	2898	0	0
514853	cg10884507	chr13	112820999	+	0.949966	0.914772	0.035194	0.0538857	6.6329e-05	0.978975	0.893521	0.0255464	0.979467	0.701084	0.0650675	0	0.915406	162335	0	0
167450	cg14742225	chr3	189625627	-	0.83707	0.877777	-0.0407068	-0.0677158	6.68045e-05	0.901456	0.706409	0.0505094	0.944171	0.710252	0.048007	0	0.915406	134590	0	0
94694	cg10014681	chr2	98744472	-	0.34497	0.322453	0.0225177	0.0945496	6.72369e-05	0.438698	0.231313	0.0517589	0.480057	0.215224	0.0671234	0	0.915406	95093	0	0
86084	cg20299046	chr2	55647702	+	0.0107746	0.0155859	-0.0048113	-0.300528	6.74595e-05	0.0299032	0.00165617	0.00703041	0.0282474	0.00229729	0.00665634	0	0.915406	294528	0	0
133689	cg11390963	chr3	31254524	+	0.0320243	0.0401248	-0.00810057	-0.254303	7.02158e-05	0.0655781	0.00171918	0.0157088	0.0989142	0.0129718	0.0177888	0	0.915406	192836	0	0
106222	cg15316475	chr2	161523447	-	0.63138	0.565605	0.0657752	0.156101	7.18756e-05	0.733671	0.43665	0.0722125	0.684492	0.290118	0.0893674	0	0.915406	46048	0	0
199272	cg18679236	chr4	178612295	+	0.50341	0.453113	0.0502972	0.148748	7.23236e-05	0.760655	0.345798	0.108695	0.653056	0.24399	0.0923648	0	0.915406	50001	0	0
391275	cg01691333	chr10	35415957	-	0.0141806	0.0177135	-0.00353286	-0.196737	7.24905e-05	0.0294855	0.000837696	0.00674541	0.0311756	0.00155245	0.00668627	0	0.915406	358182	0	0
105458	cg20433238	chr2	158183334	-	0.919514	0.935651	-0.0161372	-0.0248316	7.30348e-05	0.960118	0.874267	0.0188791	0.959568	0.896783	0.0138904	0	0.915406	261220	0	0
104332	cg18946117	chr2	149895362	-	0.0235199	0.0296596	-0.00613979	-0.242656	7.78421e-05	0.0574111	0.00529547	0.0112244	0.0765117	0.00478927	0.0164247	0	0.915406	245463	0	0
427744	cg17679980	chr11	22696306	+	0.932048	0.945992	-0.0139438	-0.0211976	8.04651e-05	0.953465	0.891211	0.0149302	0.966061	0.911482	0.012831	0	0.915406	282944	0	0
647046	cg20813763	chr18	54558018	-	0.930582	0.943441	-0.0128592	-0.0195903	8.08549e-05	0.95491	0.887768	0.0207801	0.979047	0.912675	0.0141516	0	0.915406	294414	0	0
130820	cg00384701	chr3	13974800	+	0.458687	0.400169	0.0585185	0.192408	8.21072e-05	0.729696	0.307516	0.110142	0.674528	0.220132	0.108166	0	0.915406	30891	0	0
613309	cg11897625	chr17	31611109	+	0.659782	0.604342	0.0554403	0.12465	8.22906e-05	0.772303	0.481746	0.072322	0.727405	0.243468	0.0867117	0	0.915406	66012	0	0
529735	cg01963224	chr14	71791671	+	0.0569651	0.0741048	-0.0171397	-0.328779	8.64064e-05	0.183508	0.0113126	0.040621	0.249931	0.0151751	0.0440334	0	0.915406	76633	0	0
181123	cg05603881	chr4	42401149	-	0.0201115	0.0300652	-0.0099537	-0.412035	8.91844e-05	0.036649	0.00780434	0.00707992	0.0588646	0.0106154	0.0115419	0	0.915406	156315	0	0
110165	cg23577800	chr2	178903588	+	0.970548	0.976311	-0.00576313	-0.00845456	9.05856e-05	0.980344	0.950993	0.0073209	0.990943	0.961779	0.00687729	0	0.915406	425336	0	0
549523	cg09817848	chr15	45954755	+	0.934114	0.947758	-0.0136444	-0.0207008	9.38666e-05	0.962785	0.873607	0.0214515	0.982905	0.910373	0.0150884	0	0.915406	286383	0	0
407226	cg06326646	chr10	105025646	-	0.0618646	0.074135	-0.0122704	-0.227424	9.50822e-05	0.104979	0.0315917	0.0157909	0.120931	0.0409828	0.0197724	0	0.915406	122188	0	0
655182	cg13299477	chr19	3047762	-	0.0122525	0.0150642	-0.00281167	-0.171659	9.64872e-05	0.028064	0.00545026	0.00612132	0.0263217	0.00322614	0.00535946	0	0.915406	406032	0	0
198361	cg03413465	chr4	172734776	-	0.0111761	0.0166028	-0.00542672	-0.329143	9.66123e-05	0.0397231	0.00143471	0.00808557	0.0669129	0.00177999	0.0143216	0	0.915406	270091	0	0
602772	cg13693928	chr17	3600310	+	0.644756	0.600552	0.0442037	0.100843	9.70812e-05	0.818725	0.407172	0.109908	0.771569	0.359227	0.110429	0	0.915406	87819	0	0
470704	cg09433192	chr12	46318151	-	0.928574	0.949009	-0.0204351	-0.031074	9.87286e-05	0.9637	0.872341	0.0247951	0.97706	0.918846	0.013613	0	0.915406	231465	0	0
639318	cg06920833	chr18	3666099	+	0.422729	0.330195	0.0925343	0.347103	9.89417e-05	0.80923	0.203766	0.14965	0.602065	0.160336	0.090379	0	0.915406	4991	0	0
110761	cg24312159	chr2	182284340	+	0.144373	0.187786	-0.0434124	-0.357515	0.000102145	0.311092	0.0308906	0.0815121	0.612854	0.0420343	0.0987369	0	0.915406	6689	0	0
708305	cg14583871	chr21	36043191	-	0.131351	0.163885	-0.032534	-0.298852	0.000102645	0.333401	0.0747415	0.0526438	0.306044	0.0880573	0.0557538	0	0.915406	18991	0	0
648444	cg02152068	chr18	60606857	-	0.141463	0.176035	-0.0345725	-0.296612	0.000108111	0.320678	0.0239466	0.0777353	0.474788	0.052876	0.0900339	0	0.915406	15587	0	0
134193	cg23047680	chr3	32989516	+	0.00699693	0.00998543	-0.0029885	-0.233674	0.000111283	0.0115467	0.00138621	0.0029313	0.0261187	0.00382904	0.00444477	0	0.915406	393215	0	0
696380	cg21500133	chr20	43439451	+	0.0213674	0.0297744	-0.00840704	-0.342576	0.000112423	0.0356661	0.00801129	0.006916	0.0462522	0.0122858	0.00897017	0	0.915406	185925	0	0
963	cg17132079	chr1	1294140	+	0.45809	0.404361	0.0537293	0.175899	0.000114086	0.678835	0.307614	0.100568	0.597971	0.135216	0.105511	0	0.915406	36928	0	0
580301	cg16178169	chr16	29827187	-	0.010928	0.0152298	-0.00430172	-0.269689	0.00011576	0.0264862	0.00410512	0.00499259	0.0350702	0.00459684	0.00719724	0	0.915406	317553	0	0
133690	cg12397366	chr3	31255533	+	0.036774	0.0385432	-0.00176916	-0.0535611	0.000117029	0.181717	0.0103794	0.0334531	0.112377	0.0108641	0.0217431	0	0.915406	497362	0	0
27286	cg04898719	chr1	52456918	-	0.303298	0.250248	0.0530499	0.267648	0.000118574	0.581715	0.191562	0.0922973	0.381362	0.0770697	0.0668882	0	0.915406	12924	0	0
33958	cg07168392	chr1	86861658	+	0.00988192	0.0132216	-0.0033397	-0.224012	0.000119464	0.0190463	0.00147576	0.00419627	0.0298654	0.00376398	0.00557787	0	0.915406	369986	0	0
313827	cg15376461	chr7	116593767	-	0.0326205	0.0413198	-0.00869931	-0.267968	0.000119934	0.0629119	0.0135578	0.0120183	0.0753138	0.0202088	0.0126874	0	0.915406	179761	0	0
288153	cg16123202	chr7	1287145	+	0.0681206	0.0838611	-0.0157405	-0.264825	0.000119942	0.112635	0.0354194	0.0188624	0.150441	0.0410328	0.0260277	0	0.915406	87161	0	0
83043	cg21842916	chr2	42880391	+	0.701001	0.752929	-0.0519277	-0.101697	0.000120884	0.833318	0.508699	0.0714937	0.863624	0.617966	0.0600897	0	0.915406	86945	0	0
294724	cg17209188	chr7	23387396	+	0.178523	0.226166	-0.0476429	-0.325061	0.000124082	0.358723	0.0640406	0.0845868	0.590967	0.101345	0.0991962	0	0.915406	6548	0	0
238979	cg21067654	chr5	177580340	+	0.0380858	0.0632123	-0.0251265	-0.606474	0.000128045	0.0865667	0.0194809	0.0138507	0.226442	0.0211802	0.046262	0	0.915406	37641	0	0
478484	cg22255614	chr12	62728994	+	0.924639	0.937922	-0.0132834	-0.0203597	0.000130121	0.96521	0.845118	0.0268901	0.989853	0.873556	0.0250578	0	0.915406	288875	0	0
696401	cg15324310	chr20	43514360	-	0.0115189	0.0158532	-0.00433433	-0.26474	0.000130683	0.0346195	0.00149464	0.0085429	0.0303206	0.0057896	0.00601497	0	0.915406	315986	0	0
65841	cg26163852	chr1	229569969	-	0.0773273	0.0972608	-0.0199334	-0.296617	0.000131055	0.176368	0.00858779	0.0342335	0.252362	0.0427247	0.0465568	0	0.915406	59762	0	0
696753	cg24693447	chr20	44044684	+	0.00913809	0.0125671	-0.00342896	-0.237771	0.000132746	0.0179215	0.000938527	0.00469249	0.0257368	0.00599239	0.00480422	0	0.915406	364484	0	0
312282	cg15017411	chr7	106301767	-	0.0206079	0.0293119	-0.00870408	-0.361066	0.000134272	0.0764351	0.000301852	0.0183513	0.0982609	3.99874e-05	0.023119	0	0.915406	179649	0	0
30732	cg26262482	chr1	64937345	-	0.0405255	0.0549899	-0.0144644	-0.363203	0.000137925	0.0976752	0.00842465	0.0220225	0.112321	0.0211337	0.0207203	0	0.915406	98320	0	0
711286	cg04403868	chr21	44312851	-	0.0960368	0.0644889	0.0315479	0.509468	0.000140786	0.22615	0.0386677	0.0398953	0.148045	0.0224136	0.0237039	0	0.915406	20920	0	0
416753	cg07039130	chr10	134859973	+	0.882913	0.851419	0.0314941	0.0518046	0.000142476	0.932966	0.792449	0.0302119	0.894546	0.626302	0.0520386	0	0.915406	167200	0	0
509261	cg18539122	chr13	79169872	+	0.108475	0.148987	-0.0405124	-0.42433	0.00014385	0.222239	0.0562912	0.0388862	0.347836	0.079191	0.0609453	0	0.915406	8765	0	0
365360	cg24537886	chr9	82493300	+	0.10449	0.139675	-0.0351856	-0.386618	0.000147257	0.251076	0.0410197	0.0536901	0.473538	0.0512375	0.0778321	0	0.915406	14707	0	0
663778	cg05682965	chr19	15292631	+	0.926542	0.935966	-0.00942459	-0.0144455	0.000149745	0.953742	0.895907	0.015231	0.967825	0.869185	0.0224586	0	0.915406	340097	0	0
451482	cg11344533	chr11	111475393	+	0.308427	0.260695	0.0477321	0.234295	0.000152612	0.4825	0.162254	0.0813617	0.442111	0.117223	0.0704002	0	0.915406	19291	0	0
275555	cg04529078	chr6	130787470	-	0.930859	0.943582	-0.0127229	-0.0193783	0.000152786	0.959493	0.862907	0.0226102	0.975676	0.908662	0.0147828	0	0.915406	296104	0	0
177900	cg19144897	chr4	18595299	+	0.0298093	0.0376104	-0.00780112	-0.258172	0.000153728	0.0558416	0.00685578	0.0117544	0.0612802	0.0159321	0.0103318	0	0.915406	199722	0	0
651617	cg00659077	chr18	77723271	+	0.611942	0.537904	0.0740375	0.182856	0.000155025	0.760877	0.453716	0.0845627	0.696589	0.327535	0.0797684	0	0.915406	34286	0	0
468171	cg20845987	chr12	27090478	-	0.00819513	0.010979	-0.00278383	-0.205391	0.000155329	0.0215443	0.00230231	0.00403948	0.0193219	0.00320771	0.00485198	0	0.915406	408031	0	0
384750	cg16306670	chr10	6645837	+	0.922037	0.930949	-0.00891242	-0.0137299	0.00015586	0.947095	0.864911	0.0215268	0.970239	0.880171	0.0229918	0	0.915406	347997	0	0
191036	cg05068452	chr4	115521241	+	0.146614	0.174365	-0.0277518	-0.235358	0.000156022	0.238522	0.0598525	0.0427586	0.270803	0.103486	0.0438536	0	0.915406	29679	0	0
469386	cg20470583	chr12	32638830	+	0.197993	0.252986	-0.0549933	-0.338453	0.000160298	0.395223	0.092526	0.0887094	0.665587	0.0700254	0.111422	0	0.915406	5539	0	0
267827	cg05068340	chr6	78176512	+	0.0216189	0.0301374	-0.00851851	-0.344161	0.000160474	0.0530605	0.00727299	0.010362	0.0592717	0.010827	0.0110702	0	0.915406	183474	0	0
284289	cg13351061	chr6	167051536	+	0.796231	0.76399	0.0322411	0.0588785	0.000164338	0.861549	0.695399	0.0396965	0.838978	0.577736	0.0587534	0	0.915406	151657	0	0
336004	cg06699638	chr8	37963308	+	0.0219765	0.026225	-0.00424847	-0.179972	0.000167155	0.0435558	0.0100976	0.00836862	0.0490717	0.0142124	0.00769186	0	0.915406	320041	0	0
501768	cg13910526	chr13	29528053	-	0.669993	0.578218	0.0917742	0.209167	0.000167645	0.776555	0.446891	0.0897403	0.726204	0.21016	0.0949537	0	0.915406	25659	0	0
533925	cg05053979	chr14	89681043	+	0.657444	0.578483	0.0789603	0.181644	0.000168985	0.911176	0.525732	0.111434	0.788654	0.406455	0.0847187	0	0.915406	34712	0	0
499282	cg01700504	chr13	20805391	+	0.566827	0.5213	0.0455271	0.118612	0.000169084	0.735527	0.449287	0.085209	0.727625	0.311557	0.0967821	0	0.915406	70820	0	0
646310	cg05265538	chr18	48405966	+	0.0200005	0.0267037	-0.00670314	-0.290937	0.000170155	0.0279011	0.00482121	0.00504995	0.0440248	0.0153535	0.00677052	0	0.915406	228387	0	0
167817	cg10540919	chr3	191440040	-	0.554575	0.470061	0.0845141	0.233948	0.000173553	0.785126	0.396499	0.11854	0.697377	0.205346	0.123207	0	0.915406	19372	0	0
468465	cg23067796	chr12	27967740	-	0.9424	0.918766	0.0236339	0.0362523	0.000174735	0.97787	0.884999	0.0195415	0.971274	0.774774	0.0371493	0	0.915406	211669	0	0
708264	cg25008977	chr21	35975861	+	0.0666499	0.0957145	-0.0290646	-0.463817	0.000177999	0.144728	0.0131988	0.0342447	0.27748	0.0311566	0.045708	0	0.915406	26353	0	0
451039	cg05505103	chr11	109785847	-	0.544496	0.463385	0.0811114	0.228164	0.000178964	0.737008	0.167955	0.139427	0.69142	0.167355	0.116394	0	0.915406	20682	0	0
180577	cg14426001	chr4	40751717	-	0.0521734	0.0734262	-0.0212528	-0.424203	0.000179751	0.103698	0.00223326	0.0240284	0.141173	0.0349816	0.0230408	0	0.915406	53032	0	0
619947	cg16022555	chr17	43394535	+	0.0690216	0.081416	-0.0123943	-0.210199	0.000180385	0.110095	0.0485413	0.0162078	0.136397	0.0469363	0.0186217	0	0.915406	120699	0	0
395615	cg10062091	chr10	65442359	-	0.874516	0.898717	-0.0242012	-0.0389431	0.000181553	0.941639	0.781498	0.0380889	0.963009	0.76129	0.0371207	0	0.915406	202598	0	0
611214	cg02043314	chr17	26383044	+	0.866523	0.878188	-0.0116652	-0.0190734	0.000184185	0.926913	0.774211	0.0398494	0.948734	0.677054	0.0503128	0	0.915406	298405	0	0
182893	cg03020822	chr4	56915374	-	0.0128557	0.0144572	-0.00160152	-0.0977064	0.000185561	0.0346707	0.00190939	0.0065354	0.0235763	0.00309106	0.00497789	0	0.915406	515034	0	0
509857	cg12693049	chr13	89719849	+	0.331483	0.263364	0.0681194	0.320993	0.000185631	0.565385	0.168118	0.0919433	0.437773	0.0736902	0.0832174	0	0.915406	6841	0	0
101064	cg02342258	chr2	128283053	+	0.0617217	0.0877671	-0.0260454	-0.44694	0.000185914	0.159636	0.0161065	0.0359967	0.267974	0.0376019	0.0473639	0	0.915406	34707	0	0
114097	cg19987296	chr2	202655135	+	0.940186	0.947527	-0.00734098	-0.0111032	0.000186017	0.963561	0.88803	0.0199237	0.983558	0.897786	0.0208302	0	0.915406	381175	0	0
179027	cg13621396	chr4	26861261	-	0.890056	0.837196	0.0528603	0.0873195	0.000186337	0.938935	0.763823	0.0407654	0.92773	0.622306	0.0658287	0	0.915406	104215	0	0
92367	cg20116596	chr2	85486387	-	0.950057	0.962247	-0.0121903	-0.0182033	0.00018714	0.969455	0.929772	0.0114903	0.980485	0.939435	0.00965702	0	0.915406	305205	0	0
105612	cg15199328	chr2	158866191	-	0.105939	0.138265	-0.032326	-0.354813	0.000190031	0.280484	0.0167509	0.068002	0.477615	0.0422653	0.0808259	0	0.915406	19371	0	0
134614	cg10880852	chr3	35833333	-	0.863556	0.84139	0.0221658	0.0370796	0.000190257	0.943948	0.809571	0.0332683	0.903203	0.714144	0.0420392	0	0.915406	208719	0	0
555765	cg10284278	chr15	68468049	+	0.106111	0.136952	-0.0308404	-0.339834	0.00019204	0.288032	0.0414188	0.0617927	0.464377	0.0369262	0.0791184	0	0.915406	22381	0	0
639317	cg01367444	chr18	3665966	+	0.337107	0.261347	0.0757606	0.355244	0.000193864	0.630989	0.140552	0.118698	0.465108	0.101238	0.0716089	0	0.915406	4528	0	0
431225	cg23391889	chr11	44349464	-	0.587569	0.659905	-0.072336	-0.164851	0.00019672	0.771809	0.378262	0.100439	0.868837	0.441658	0.115345	0	0.915406	41712	0	0
286965	cg14017435	chr7	559675	+	0.00971809	0.0130547	-0.00333664	-0.225543	0.000197105	0.0213283	0.0015222	0.0056391	0.0296806	0.000896325	0.00713018	0	0.915406	370182	0	0
79869	cg27514107	chr2	28373887	+	0.904721	0.918466	-0.0137449	-0.0215172	0.000197318	0.948697	0.809698	0.0396206	0.99618	0.820873	0.0328957	0	0.915406	280911	0	0
134418	cg08517826	chr3	33759932	+	0.0105471	0.0149306	-0.00438353	-0.278985	0.000197916	0.0318638	0.000278929	0.00855721	0.0597816	0.00307212	0.010838	0	0.915406	313728	0	0
68713	cg07830269	chr1	240363446	+	0.72232	0.681361	0.0409588	0.0830345	0.000199628	0.885911	0.426414	0.112711	0.865605	0.426677	0.0944419	0	0.915406	110137	0	0
135468	cg06492699	chr3	39149242	+	0.00707451	0.00895665	-0.00188214	-0.15086	0.00019975	0.018805	0.00143988	0.00413229	0.0162951	0.00285163	0.00371271	0	0.915406	485940	0	0
689580	cg22610655	chr20	20346426	+	0.043823	0.0512186	-0.00739556	-0.185746	0.00020054	0.13877	0.00973822	0.026885	0.0986643	0.0205018	0.0184293	0	0.915406	209713	0	0
572398	cg16749825	chr16	3241054	+	0.162537	0.254114	-0.0915765	-0.614252	0.000202606	0.39805	0.0634746	0.0843193	0.54877	0.0591891	0.119064	0	0.915406	313	0	0
346218	cg06696240	chr8	99049441	+	0.0271305	0.0390102	-0.0118797	-0.400476	0.000203333	0.0703929	0.00415677	0.0164791	0.0758533	0.0150257	0.0133868	0	0.915406	127165	0	0
446804	cg20831648	chr11	78761473	+	0.826668	0.791342	0.0353266	0.0622382	0.000203764	0.934509	0.637422	0.0768915	0.939739	0.613937	0.0810837	0	0.915406	144857	0	0
199347	cg06987041	chr4	181027487	-	0.871227	0.892462	-0.021235	-0.0343526	0.000204312	0.918904	0.813171	0.0283178	0.924297	0.851256	0.0199914	0	0.915406	218534	0	0
162840	cg22469804	chr3	171131904	-	0.930101	0.938967	-0.00886578	-0.0135418	0.000210849	0.952185	0.891035	0.0159068	0.967804	0.89278	0.0134932	0	0.915406	350122	0	0
572612	cg05754148	chr16	3507555	-	0.0470717	0.0277553	0.0193164	0.596095	0.000211926	0.133813	0.00949266	0.0256259	0.0618129	0.0069974	0.0122656	0	0.915406	63079	0	0
597948	cg00520378	chr16	88773576	-	0.467262	0.404553	0.062709	0.203225	0.0002145	0.714817	0.215524	0.133641	0.649197	0.10783	0.144956	0	0.915406	27418	0	0
661719	cg05015306	chr19	12163127	-	0.0111582	0.014675	-0.00351686	-0.221837	0.000216492	0.0237322	0.00336449	0.00609463	0.0548165	0.00365146	0.00861235	0	0.915406	359098	0	0
247422	cg11649040	chr6	24403712	+	0.0149537	0.0191565	-0.0042028	-0.224564	0.000216988	0.0272301	0.00422399	0.00614977	0.0366447	0.0039463	0.00938939	0	0.915406	322262	0	0
626946	cg27394136	chr17	62492387	-	0.0224709	0.0288826	-0.00641162	-0.259974	0.000218201	0.0423593	0.00886452	0.00730676	0.0488715	0.0119796	0.00873255	0	0.915406	236851	0	0
155997	cg11025877	chr3	134202227	-	0.0910009	0.116329	-0.0253283	-0.32282	0.000218242	0.2475	0.00900916	0.0625028	0.398611	0.018005	0.0701771	0	0.915406	36953	0	0
661759	cg01172903	chr19	12203315	-	0.0088109	0.0118861	-0.00307521	-0.218447	0.000218262	0.0275577	0.00333166	0.00480829	0.0290001	0.0039071	0.00612351	0	0.915406	387161	0	0
164321	cg10358197	chr3	180456625	+	0.937991	0.953816	-0.0158253	-0.0238848	0.00022081	0.960094	0.901703	0.0174646	0.989674	0.902596	0.0174831	0	0.915406	266520	0	0
246723	cg20492262	chr6	19804993	-	0.0148739	0.020999	-0.00612516	-0.317592	0.000222869	0.0276762	0.00423243	0.00457551	0.0533375	0.00757554	0.00849056	0	0.915406	245937	0	0
430751	cg22764193	chr11	43333145	+	0.301185	0.241921	0.0592638	0.3048	0.000226646	0.471176	0.133911	0.0794041	0.455387	0.106392	0.0797548	0	0.915406	8345	0	0
504035	cg03753320	chr13	40768855	+	0.94044	0.953684	-0.0132447	-0.0199657	0.000227094	0.971166	0.893379	0.0208506	0.981885	0.917468	0.0148361	0	0.915406	291681	0	0
579104	cg03376794	chr16	25704507	-	0.0168571	0.0218421	-0.00498502	-0.245633	0.00023029	0.0340606	0.00484013	0.00699195	0.0423454	0.00831679	0.00796681	0	0.915406	287349	0	0
445454	cg19586851	chr11	75278281	-	0.970342	0.976756	-0.00641402	-0.00940829	0.000230876	0.987623	0.951019	0.0103555	0.988262	0.957571	0.00723508	0	0.915406	407931	0	0
272457	cg19468734	chr6	110797063	+	0.019387	0.0258129	-0.00642587	-0.2853	0.000232552	0.0361371	0.00470128	0.00868947	0.0457321	0.0108263	0.00950051	0	0.915406	236416	0	0
7539	cg27419176	chr1	10093251	-	0.00576109	0.00785635	-0.00209526	-0.18007	0.000233157	0.0122766	0.000836899	0.00313321	0.0261615	0.00168201	0.00464851	0	0.915406	465158	0	0
251029	cg26817121	chr6	30034500	+	0.0636239	0.077165	-0.0135412	-0.243576	0.000233249	0.112353	0.0303537	0.0162483	0.113006	0.0325842	0.0183707	0	0.915406	107657	0	0
15733	cg27384893	chr1	26437597	-	0.0154765	0.0201845	-0.00470798	-0.24464	0.000233419	0.0283035	0.00573132	0.00628404	0.0314058	0.00751675	0.00607909	0	0.915406	298994	0	0
344027	cg00266009	chr8	85095275	-	0.0188498	0.0242294	-0.00537969	-0.246679	0.000234338	0.0346418	0.00688302	0.00729053	0.0489991	0.00804831	0.00862442	0	0.915406	271849	0	0
694045	cg09339934	chr20	35808481	+	0.0140399	0.0172556	-0.00321567	-0.18112	0.000236885	0.0232892	0.00414689	0.00492657	0.0294394	0.00827148	0.00524911	0	0.915406	377888	0	0
475176	cg00796424	chr12	54365966	+	0.400981	0.293177	0.107804	0.438912	0.000238067	0.828636	0.157749	0.169185	0.643723	0.102323	0.127624	0	0.915406	1678	0	0
137518	cg25437886	chr3	45677346	-	0.18115	0.23336	-0.0522098	-0.348385	0.000239025	0.409861	0.0598249	0.0989225	0.679223	0.0597052	0.119905	0	0.915406	4910	0	0
461140	cg23524436	chr12	2161437	-	0.0414441	0.0494174	-0.00797329	-0.20788	0.000241107	0.086148	0.0148004	0.0166574	0.0823444	0.0226142	0.0146236	0	0.915406	195783	0	0
169252	cg02133624	chr3	195590041	-	0.480155	0.452262	0.0278934	0.0845283	0.000241142	0.566746	0.352354	0.0618578	0.681617	0.323383	0.0736727	0	0.915406	108001	0	0
267188	cg23683853	chr6	73886830	+	0.905596	0.876366	0.0292295	0.0468079	0.000242389	0.965724	0.78147	0.0447834	0.960129	0.669733	0.0579938	0	0.915406	179870	0	0
202366	cg19574479	chr5	525440	+	0.473648	0.576597	-0.102949	-0.278412	0.000242802	0.765565	0.103271	0.138025	0.841189	0.354384	0.109229	0	0.915406	11475	0	0
183084	cg24897065	chr4	57524669	-	0.0619609	0.078979	-0.0170181	-0.306251	0.00024322	0.199766	0.0183548	0.0414164	0.180027	0.0203535	0.03712	0	0.915406	77507	0	0
261150	cg26916927	chr6	38671019	-	0.0213001	0.0254577	-0.00415764	-0.179933	0.000243646	0.0407929	0.00871201	0.00672247	0.048058	0.0116443	0.00787964	0	0.915406	324461	0	0
284812	cg08381955	chr6	168226576	+	0.023675	0.0337129	-0.0100379	-0.37638	0.000246319	0.0519293	0.00889555	0.0112687	0.111157	0.00580354	0.0181292	0	0.915406	154872	0	0
215591	cg06030649	chr5	73981490	+	0.0103269	0.0123817	-0.00205481	-0.138931	0.000247822	0.0241351	0.00248819	0.00509325	0.0204432	0.00606003	0.00339283	0	0.915406	468919	0	0
186065	cg16023162	chr4	82136337	-	0.0320551	0.0378559	-0.00580077	-0.186415	0.000249074	0.0504185	0.0166261	0.00860609	0.0590203	0.0180268	0.0117465	0	0.915406	256765	0	0
279054	cg25634742	chr6	146864328	-	0.038438	0.050184	-0.0117459	-0.313239	0.000249393	0.0919322	0.00819969	0.0222093	0.153841	0.015083	0.0302149	0	0.915406	129010	0	0
75509	cg22749881	chr2	11859844	-	0.219226	0.2749	-0.0556733	-0.313681	0.00025045	0.401722	0.0879658	0.0774796	0.581033	0.141132	0.08099	0	0.915406	7504	0	0
163395	cg07453715	chr3	173711163	+	0.79495	0.769412	0.0255389	0.0465147	0.000251908	0.86396	0.701947	0.0411371	0.849476	0.539303	0.0589785	0	0.915406	180664	0	0
703603	cg11394317	chr20	61468685	-	0.956108	0.964719	-0.00861066	-0.0128014	0.00025252	0.970747	0.940312	0.00870617	0.983629	0.950969	0.00759461	0	0.915406	358807	0	0
376315	cg07309060	chr9	132406044	+	0.953562	0.940578	0.0129836	0.019572	0.000253029	0.976637	0.9312	0.0114273	0.964375	0.796021	0.027793	0	0.915406	294569	0	0
363327	cg06272555	chr9	36862435	+	0.393353	0.356391	0.0369616	0.138658	0.000253608	0.536368	0.246115	0.0705416	0.51327	0.215485	0.0773812	0	0.915406	56121	0	0
382357	cg11349980	chr10	1016695	+	0.766977	0.736983	0.0299946	0.0567976	0.000254004	0.833276	0.672743	0.0413664	0.831512	0.516258	0.0645717	0	0.915406	156016	0	0
177737	cg18188326	chr4	17518450	-	0.748019	0.715681	0.0323388	0.0629	0.000254242	0.802411	0.637874	0.0403558	0.815419	0.570291	0.0548255	0	0.915406	143530	0	0
415057	cg19256291	chr10	133156155	-	0.648195	0.752051	-0.103856	-0.211373	0.000259295	0.845143	0.417057	0.110135	0.924379	0.491079	0.128279	0	0.915406	25033	0	0
314165	cg14030525	chr7	119960959	+	0.539621	0.438843	0.100778	0.292226	0.00025948	0.771604	0.353803	0.120649	0.734824	0.176722	0.126761	0	0.915406	9672	0	0
372196	cg04502390	chr9	120466347	+	0.0945171	0.121769	-0.0272521	-0.334274	0.000260538	0.270832	0.0219726	0.0625167	0.407622	0.0223977	0.0729201	0	0.915406	31043	0	0
428481	cg15310492	chr11	30038677	+	0.0885002	0.0965635	-0.00806334	-0.113515	0.000261099	0.218298	0.0341398	0.0505338	0.232506	0.0237728	0.0462747	0	0.915406	193705	0	0
264557	cg21602435	chr6	47320500	+	0.116445	0.149902	-0.033457	-0.338678	0.00026172	0.304163	0.0222055	0.0699846	0.459942	0.0292923	0.08026	0	0.915406	17337	0	0
520157	cg23357503	chr14	25519602	-	0.0334749	0.0421238	-0.00864894	-0.261761	0.000262594	0.0474237	0.0146919	0.00827591	0.0745798	0.0136426	0.0136039	0	0.915406	180807	0	0
674113	cg08400147	chr19	42807187	-	0.0152323	0.0195657	-0.00433341	-0.228653	0.000265851	0.0286631	0.00443357	0.0056813	0.0320451	0.00632535	0.0064066	0	0.915406	316026	0	0
560232	cg16751781	chr15	78858589	-	0.046027	0.0599109	-0.013884	-0.319396	0.000266017	0.0908126	0.0192246	0.0159075	0.11758	0.019943	0.0220611	0	0.915406	103990	0	0
24263	cg17737314	chr1	44114355	-	0.0966206	0.132373	-0.0357529	-0.417195	0.000266218	0.234021	0.0119484	0.0549972	0.244836	0.0391478	0.0552229	0	0.915406	13884	0	0
452500	cg16396907	chr11	114229775	+	0.0925681	0.125726	-0.0331578	-0.404114	0.000267069	0.215083	0.0237873	0.0453952	0.330646	0.0493538	0.0582135	0	0.915406	17847	0	0
718294	cg13851454	chr22	27639629	-	0.832953	0.759875	0.0730778	0.130828	0.000267946	0.929636	0.719335	0.0526231	0.917945	0.445769	0.0838314	0	0.915406	61397	0	0
103688	cg22515303	chr2	145037160	-	0.963688	0.961891	0.00179647	0.00266426	0.000268458	0.98857	0.862165	0.0257614	0.98004	0.88453	0.0190535	0	0.915406	596975	0	0
264238	cg04801402	chr6	46138912	+	0.0412749	0.0555176	-0.0142427	-0.35363	0.000271492	0.0709687	0.0161003	0.0138802	0.085514	0.0233987	0.0167931	0	0.915406	100471	0	0
435284	cg10330673	chr11	61125062	+	0.483762	0.445456	0.0383057	0.116503	0.000272902	0.649721	0.2789	0.0747241	0.623584	0.297031	0.0782662	0	0.915406	72604	0	0
69181	cg12974891	chr1	243416808	-	0.0834014	0.103004	-0.0196025	-0.274857	0.000274972	0.268248	0.0309406	0.0511773	0.283945	0.0316315	0.0475077	0	0.915406	61555	0	0
679938	cg10773601	chr19	51226046	-	0.723277	0.681301	0.0419762	0.0850447	0.000275809	0.818321	0.649605	0.046454	0.900707	0.452103	0.0831402	0	0.915406	107256	0	0
661300	cg08267614	chr19	11485407	-	0.0105515	0.0142709	-0.0037194	-0.239984	0.000276131	0.0233225	0.00465777	0.00468482	0.0249861	0.00548182	0.00521651	0	0.915406	347536	0	0
361068	cg03998546	chr9	19229813	-	0.109579	0.146431	-0.0368516	-0.387559	0.000276234	0.265561	0.0262362	0.06726	0.419537	0.0406839	0.0805889	0	0.915406	12497	0	0
452628	cg10098193	chr11	115000471	-	0.543901	0.475233	0.0686682	0.190951	0.00027707	0.71713	0.378354	0.0891844	0.663828	0.255801	0.0907567	0	0.915406	31373	0	0
341922	cg12413865	chr8	70550790	-	0.970499	0.958374	0.0121251	0.0179519	0.000279094	0.986592	0.946868	0.010704	0.985652	0.851444	0.0232925	0	0.915406	307297	0	0
657073	cg09310112	chr19	4969989	+	0.01849	0.0229437	-0.00445362	-0.209543	0.0002794	0.0467982	0.00537586	0.00890856	0.0577513	0.0099759	0.010241	0	0.915406	310423	0	0
469203	cg04202120	chr12	31883115	+	0.799321	0.743979	0.0553423	0.102188	0.000279768	0.929816	0.549601	0.089635	0.87936	0.554148	0.0907051	0	0.915406	86429	0	0
124254	cg19438494	chr2	239107946	-	0.91097	0.924705	-0.0137344	-0.021356	0.000279834	0.959017	0.87052	0.0241475	0.961286	0.883877	0.0186204	0	0.915406	281905	0	0
37177	cg20275549	chr1	104107493	-	0.966468	0.954884	0.0115839	0.0172171	0.000282137	0.984469	0.922226	0.0148451	0.981091	0.874618	0.0244874	0	0.915406	313561	0	0
142870	cg24634060	chr3	57112383	+	0.0592137	0.0678	-0.00858631	-0.168713	0.000283142	0.18254	0.0247899	0.0319195	0.172015	0.029141	0.0315958	0	0.915406	182075	0	0
328084	cg04636166	chr8	6914420	-	0.828141	0.748653	0.0794884	0.143753	0.000283451	0.921789	0.605831	0.0775286	0.908629	0.323692	0.108203	0	0.915406	52912	0	0
390242	cg21195070	chr10	31017368	-	0.758278	0.608581	0.149696	0.312664	0.000283775	0.936077	0.333096	0.153159	0.902584	0.275447	0.162886	0	0.915406	7584	0	0
566554	cg01772159	chr15	100259890	-	0.981795	0.976779	0.00501605	0.00731501	0.000287466	0.994043	0.972236	0.00583604	0.991987	0.953797	0.00823809	0	0.915406	448996	0	0
628699	cg09683258	chr17	70429180	-	0.315613	0.243815	0.0717972	0.359377	0.00028758	0.631857	0.17358	0.119308	0.57288	0.101605	0.103744	0	0.915406	4305	0	0
384567	cg14890168	chr10	6190408	-	0.0849951	0.111765	-0.0267698	-0.358173	0.000288424	0.234744	0.0224562	0.0522287	0.367171	0.0259609	0.0669958	0	0.915406	32475	0	0
475316	cg18540674	chr12	54405379	+	0.111095	0.0805388	0.0305559	0.419528	0.000289916	0.235452	0.0656069	0.0436539	0.143055	0.031612	0.0277282	0	0.915406	23020	0	0
633556	cg13777759	chr17	77134081	+	0.84683	0.895947	-0.0491165	-0.0804168	0.00029138	0.937892	0.674874	0.0712114	0.95926	0.805106	0.0409049	0	0.915406	114015	0	0
388261	cg23850174	chr10	22542726	+	0.0596661	0.0680007	-0.00833454	-0.163029	0.000292197	0.217394	0.00991086	0.0450226	0.164793	0.0241723	0.038182	0	0.915406	187549	0	0
638957	cg14133708	chr18	2846834	-	0.0305165	0.0419461	-0.0114295	-0.358503	0.000292892	0.0500667	0.0156415	0.00924865	0.107699	0.0203287	0.0177802	0	0.915406	133362	0	0
163065	cg23178790	chr3	171865189	-	0.932325	0.944295	-0.0119706	-0.0182115	0.000293447	0.962356	0.876201	0.0236841	0.97689	0.885457	0.0191617	0	0.915406	305134	0	0
656004	cg17299616	chr19	3825330	-	0.760401	0.791359	-0.0309584	-0.0568399	0.000294954	0.840638	0.461135	0.0758477	0.888734	0.611111	0.0559809	0	0.915406	155923	0	0
190938	cg01021724	chr4	114683242	-	0.0191324	0.0223287	-0.00319634	-0.150193	0.000295387	0.0345839	0.0100888	0.00568764	0.0331106	0.0140394	0.00487691	0	0.915406	379083	0	0
34154	cg01516372	chr1	87617972	-	0.148949	0.17544	-0.0264906	-0.222385	0.000295412	0.359464	0.0777878	0.0717597	0.401217	0.0724805	0.0753927	0	0.915406	33315	0	0
424431	cg05242314	chr11	10619523	-	0.146668	0.197506	-0.0508374	-0.405437	0.000297256	0.326667	0.0607011	0.0834333	0.582336	0.0426126	0.105403	0	0.915406	3518	0	0
535736	cg08484791	chr14	94266254	+	0.604364	0.702812	-0.098448	-0.214428	0.000297498	0.783146	0.204346	0.129529	0.847347	0.480903	0.0812656	0	0.915406	24172	0	0
131916	cg09619282	chr3	16930667	-	0.0288247	0.0402339	-0.0114092	-0.371687	0.000298559	0.0559011	0.00876337	0.0117214	0.0855571	0.0135218	0.0181219	0	0.915406	133633	0	0
579336	cg17212881	chr16	27343638	+	0.171177	0.207831	-0.0366543	-0.265812	0.000300751	0.356438	0.0480433	0.0918706	0.478967	0.0517767	0.0844475	0	0.915406	13237	0	0
167147	cg14696728	chr3	188149653	+	0.144158	0.188159	-0.0440008	-0.362247	0.000301458	0.320117	0.0289152	0.0806602	0.605254	0.0305266	0.105628	0	0.915406	6322	0	0
439698	cg00569953	chr11	66036020	-	0.012353	0.0154166	-0.0030636	-0.185302	0.000303891	0.0248858	0.00389864	0.00587103	0.0243668	0.00719072	0.00420896	0	0.915406	387954	0	0
668712	cg02493939	chr19	33794746	-	0.138276	0.166318	-0.0280419	-0.249894	0.000304916	0.324938	0.0798728	0.0560411	0.344847	0.069227	0.0672307	0	0.915406	28904	0	0
693016	cg15711208	chr20	33836573	-	0.927426	0.89566	0.0317657	0.0497348	0.000308476	0.965593	0.874357	0.0263055	0.969753	0.71108	0.0629245	0	0.915406	172317	0	0
233084	cg12213763	chr5	154265167	+	0.198865	0.249453	-0.050588	-0.312902	0.000310439	0.449619	0.0664455	0.109795	0.696438	0.0561368	0.120528	0	0.915406	7567	0	0
454450	cg21333964	chr11	118955461	+	0.0239404	0.0298125	-0.00587203	-0.230215	0.000313454	0.0419034	0.0100344	0.00811795	0.0587949	0.00940296	0.0112263	0	0.915406	254327	0	0
127799	cg26395694	chr3	4783306	-	0.0707185	0.102955	-0.0322367	-0.48478	0.000314113	0.176186	0.015261	0.0435301	0.373783	0.0256073	0.0653391	0	0.915406	19551	0	0
547409	cg12787209	chr15	41139786	+	0.110147	0.138476	-0.0283294	-0.305433	0.000317797	0.254622	0.0499092	0.0571933	0.426219	0.0359983	0.0721496	0	0.915406	28194	0	0
436579	cg10174343	chr11	62623865	-	0.0149846	0.0186762	-0.00369164	-0.198817	0.000319012	0.0241391	0.00491831	0.00513646	0.0315364	0.00790096	0.0046638	0	0.915406	349070	0	0
526780	cg14370910	chr14	62593650	+	0.101722	0.0665744	0.0351473	0.544975	0.000319173	0.250306	0.022918	0.0624412	0.15503	0.0142278	0.0347195	0	0.915406	14764	0	0
385497	cg02292901	chr10	11001688	-	0.655183	0.607712	0.0474709	0.106817	0.000319678	0.78462	0.512643	0.0751187	0.83572	0.417039	0.0852359	0	0.915406	81552	0	0
536936	cg04445557	chr14	96830932	+	0.0373508	0.0499159	-0.0125651	-0.339549	0.000321382	0.099438	0.00850144	0.0233439	0.183307	0.0131041	0.0301323	0	0.915406	118631	0	0
340715	cg01509237	chr8	63160509	-	0.0289572	0.0415952	-0.0126381	-0.405349	0.000323597	0.0542366	0.00259422	0.0148218	0.093061	0.0118191	0.0193433	0	0.915406	117731	0	0
641062	cg25836232	chr18	12306837	+	0.426732	0.37947	0.047262	0.165236	0.000324685	0.641643	0.264089	0.0950417	0.561701	0.181393	0.0950365	0	0.915406	41523	0	0
642704	cg18242219	chr18	23666144	+	0.930375	0.942986	-0.0126114	-0.0192195	0.000324812	0.950646	0.884957	0.0169605	0.969796	0.900945	0.0155801	0	0.915406	297323	0	0
341093	cg03287740	chr8	66546718	+	0.0184921	0.0277456	-0.00925347	-0.405745	0.000325093	0.0545591	0.00219178	0.0143115	0.0654506	0.00576716	0.013871	0	0.915406	168922	0	0
666202	cg19771975	chr19	18726088	+	0.886535	0.821178	0.0653573	0.109203	0.000328973	0.956048	0.742363	0.0401006	0.936954	0.36282	0.114439	0	0.915406	79257	0	0
480622	cg03565659	chr12	72332624	+	0.0567349	0.0711016	-0.0143667	-0.281289	0.000329252	0.0981391	0.0292192	0.0188932	0.110595	0.0340377	0.0194102	0	0.915406	99291	0	0
479136	cg01199603	chr12	65718113	+	0.957418	0.966942	-0.00952351	-0.0141328	0.000330391	0.976621	0.923013	0.0140385	0.997335	0.925494	0.0160059	0	0.915406	343448	0	0
274890	cg18614558	chr6	126354868	+	0.0684603	0.0855537	-0.0170934	-0.284349	0.000332154	0.156291	0.0302386	0.028512	0.206285	0.0388246	0.034656	0	0.915406	76957	0	0
252285	cg03713952	chr6	30640347	+	0.0236576	0.0282995	-0.00464188	-0.186393	0.000333344	0.0366888	0.013152	0.00620929	0.0451793	0.0167071	0.0063487	0	0.915406	301984	0	0
35373	cg08893087	chr1	93416982	-	0.593163	0.507525	0.0856383	0.22092	0.000333682	0.777118	0.424529	0.0881063	0.715162	0.283751	0.0919406	0	0.915406	22501	0	0
124882	cg05933219	chr2	240099221	+	0.980359	0.974676	0.00568293	0.00830239	0.000335489	0.995722	0.960077	0.00899014	0.989754	0.918448	0.0128114	0	0.915406	428345	0	0
461846	cg10104252	chr12	3563899	+	0.287816	0.373989	-0.0861729	-0.366643	0.000336304	0.469813	0.0675422	0.120997	0.75025	0.103819	0.125384	0	0.915406	3935	0	0
661897	cg03809891	chr19	12476514	+	0.0168377	0.0227191	-0.00588135	-0.28587	0.000341733	0.0532746	0.00459006	0.0100305	0.107425	0.00745055	0.0174489	0	0.915406	254023	0	0
485993	cg04814136	chr12	105043367	+	0.172744	0.222518	-0.0497743	-0.347521	0.000342266	0.376877	0.0421598	0.0948192	0.654252	0.058353	0.115656	0	0.915406	4958	0	0
30225	cg26305583	chr1	62791631	-	0.823016	0.781049	0.0419672	0.0745776	0.000342682	0.917456	0.719237	0.0623804	0.872582	0.580957	0.0607033	0	0.915406	122997	0	0
42629	cg20809377	chr1	150574467	-	0.961671	0.969889	-0.00821801	-0.0121504	0.000342935	0.978546	0.934455	0.0106511	0.982802	0.939004	0.00953476	0	0.915406	366980	0	0
639199	cg16107927	chr18	3447247	-	0.133478	0.159272	-0.0257942	-0.238516	0.000344039	0.311709	0.0397395	0.0721315	0.419832	0.0454934	0.0766018	0	0.915406	35483	0	0
506588	cg12378878	chr13	50700606	-	0.0314411	0.0381295	-0.0066884	-0.215859	0.000346644	0.0676212	0.00959356	0.0136019	0.0833077	0.00835439	0.0169171	0	0.915406	228791	0	0
507841	cg17903776	chr13	61989726	+	0.0525182	0.0667029	-0.0141847	-0.295006	0.000346717	0.209331	0.0126786	0.0374059	0.171389	0.0218478	0.0354996	0	0.915406	101043	0	0
196447	cg19553598	chr4	156131088	-	0.547101	0.431564	0.115537	0.335315	0.000346981	0.799986	0.298609	0.132896	0.603798	0.108107	0.130906	0	0.915406	5768	0	0
444892	cg00211630	chr11	74022875	+	0.147926	0.196369	-0.048443	-0.385978	0.000347112	0.272471	0.0547365	0.054385	0.39187	0.093984	0.0778298	0	0.915406	4296	0	0
641719	cg27019651	chr18	18743966	+	0.0399032	0.0537345	-0.0138313	-0.352943	0.000347659	0.0810856	0.0140243	0.0166594	0.126168	0.0175534	0.0234142	0	0.915406	104527	0	0
667136	cg00708258	chr19	19844076	-	0.0157938	0.0184576	-0.00266385	-0.141792	0.000348502	0.0240792	0.00518423	0.00521495	0.0311023	0.00532371	0.00521427	0	0.915406	417127	0	0
97380	cg15166478	chr2	109237735	-	0.0136729	0.0231077	-0.00943482	-0.483931	0.000349118	0.0348386	1.19469e-05	0.0100661	0.063476	0.00313942	0.0132408	0	0.915406	165511	0	0
316049	cg02041484	chr7	129266958	-	0.155731	0.206483	-0.0507524	-0.385414	0.000349347	0.343521	0.0566584	0.0749559	0.579752	0.067821	0.0998543	0	0.915406	3544	0	0
93518	cg12539060	chr2	89203426	+	0.0229428	0.0348958	-0.011953	-0.446616	0.000350052	0.0454913	0.00787987	0.00965525	0.0845987	0.0098795	0.0167122	0	0.915406	126195	0	0
37461	cg12772169	chr1	108742377	-	0.00664733	0.00979673	-0.0031494	-0.249971	0.00035041	0.0168465	0.00123601	0.00435109	0.0220812	0.00222411	0.00472057	0	0.915406	382225	0	0
410401	cg14748181	chr10	119214194	+	0.0263091	0.0472351	-0.0209259	-0.656567	0.000351154	0.0856223	0.0039603	0.0169337	0.168984	0.00922139	0.0364738	0	0.915406	54667	0	0
36151	cg24808901	chr1	95698954	+	0.611714	0.497278	0.114436	0.293474	0.000356046	0.886177	0.402949	0.136773	0.752083	0.188797	0.129811	0	0.915406	9531	0	0
357278	cg01764079	chr8	144718741	-	0.0140397	0.0197508	-0.00571116	-0.307513	0.000356651	0.0303368	0.000537584	0.00732944	0.0630771	0.00409907	0.0109056	0	0.915406	259827	0	0
416884	cg07505629	chr10	134929753	+	0.896505	0.853445	0.04306	0.0702106	0.000359881	0.958076	0.809239	0.0391668	0.948152	0.623559	0.0817885	0	0.915406	130151	0	0
681558	cg11293016	chr19	54402647	+	0.562749	0.494567	0.0681822	0.182858	0.000360723	0.85179	0.355627	0.1266	0.746519	0.304341	0.105029	0	0.915406	34283	0	0
646224	cg20532148	chr18	48171572	+	0.753895	0.703847	0.0500479	0.0977592	0.000364439	0.929724	0.628795	0.0693089	0.866909	0.567796	0.0739971	0	0.915406	91329	0	0
26187	cg00806138	chr1	47881404	-	0.851765	0.808339	0.043426	0.0745958	0.000366756	0.915777	0.739921	0.0423061	0.902733	0.435832	0.0717843	0	0.915406	122965	0	0
193725	cg07444408	chr4	141218466	+	0.865471	0.886334	-0.0208634	-0.0339777	0.00036741	0.92083	0.724044	0.0388463	0.943741	0.707917	0.0392343	0	0.915406	219873	0	0
481180	cg23859173	chr12	76982640	+	0.133265	0.172978	-0.0397137	-0.35299	0.000369157	0.290754	0.0704152	0.0565955	0.425277	0.0524344	0.0731738	0	0.915406	9461	0	0
566758	cg15911339	chr15	100923990	-	0.376342	0.475429	-0.0990872	-0.329382	0.000369846	0.590791	0.102415	0.115069	0.692972	0.32064	0.112701	0	0.915406	6214	0	0
467316	cg21477262	chr12	22777430	-	0.946182	0.920636	0.0255463	0.0390686	0.000370153	0.979315	0.917793	0.0185772	0.969842	0.813638	0.0391091	0	0.915406	202175	0	0
188415	cg06158944	chr4	99182422	-	0.00730499	0.0101294	-0.00282442	-0.218117	0.000378694	0.0142703	0.00166433	0.00364818	0.0316538	0.00265733	0.00507857	0	0.915406	405058	0	0
123501	cg14536600	chr2	237762278	-	0.824218	0.785868	0.0383498	0.0678949	0.00037876	0.900693	0.737785	0.0525598	0.902683	0.547347	0.0738145	0	0.915406	134251	0	0
408170	cg06704093	chr10	110226132	-	0.0525481	0.0604064	-0.00785835	-0.170742	0.000379473	0.196197	0.0130343	0.0396827	0.220473	0.0153181	0.0439685	0	0.915406	198427	0	0
395560	cg09923354	chr10	65258614	-	0.166498	0.209766	-0.0432686	-0.31632	0.000380025	0.406238	0.0517383	0.0928848	0.614069	0.0348644	0.111152	0	0.915406	7269	0	0
415510	cg15158859	chr10	133978304	+	0.39669	0.335966	0.0607242	0.2333	0.000380733	0.649647	0.18369	0.119252	0.633699	0.107374	0.126989	0	0.915406	19500	0	0
709628	cg00168694	chr21	40193056	-	0.160488	0.20826	-0.0477715	-0.356374	0.000380983	0.376092	0.0258898	0.0880207	0.614429	0.0372938	0.110711	0	0.915406	4562	0	0
117425	cg19225688	chr2	218990043	-	0.13885	0.194202	-0.0553513	-0.456132	0.000382248	0.274363	0.0305898	0.0722945	0.536255	0.0764221	0.0933311	0	0.915406	2478	0	0
226164	cg17772342	chr5	134871686	-	0.295171	0.261637	0.0335348	0.167942	0.000387787	0.463728	0.238861	0.046508	0.362138	0.193403	0.040789	0	0.915406	40278	0	0
52791	cg20746459	chr1	179520181	-	0.910442	0.856294	0.0541483	0.0874705	0.00038989	0.974094	0.824912	0.0357461	0.955172	0.486435	0.0914685	0	0.915406	104001	0	0
257158	cg12445115	chr6	32952759	+	0.0108209	0.01462	-0.00379904	-0.241795	0.00039502	0.0255837	0.002636	0.00488441	0.035409	0.00026222	0.00773003	0	0.915406	343211	0	0
242010	cg19886655	chr6	2958852	+	0.127805	0.158987	-0.0311819	-0.294284	0.000395709	0.295559	0.0317197	0.068619	0.487373	0.0382837	0.0828126	0	0.915406	21653	0	0
416746	cg03793951	chr10	134856499	-	0.877074	0.851341	0.0257334	0.0424705	0.000397826	0.929857	0.784181	0.0303093	0.913955	0.648441	0.0502408	0	0.915406	191891	0	0
541444	cg16050468	chr14	105011965	-	0.727933	0.829355	-0.101422	-0.185791	0.000398777	0.91444	0.311907	0.138346	0.983351	0.426353	0.123729	0	0.915406	33177	0	0
79847	cg09946076	chr2	28216542	-	0.154109	0.205244	-0.0511349	-0.391319	0.000399923	0.348456	0.030091	0.0879915	0.585576	0.0553428	0.104899	0	0.915406	3431	0	0
648666	cg14843013	chr18	61111956	+	0.0914291	0.121049	-0.02962	-0.369635	0.000400889	0.266692	0.0314573	0.058634	0.388264	0.0133147	0.0665269	0	0.915406	25018	0	0
708691	cg14564494	chr21	37506911	+	0.156364	0.189709	-0.033345	-0.263555	0.000401302	0.31979	0.0668569	0.0664959	0.384854	0.0744541	0.0674627	0	0.915406	17524	0	0
294002	cg02182021	chr7	20278437	+	0.170087	0.136038	0.0340485	0.302346	0.00040182	0.278792	0.0820494	0.0575506	0.309584	0.042093	0.0570362	0	0.915406	16410	0	0
613665	cg26426228	chr17	33306391	+	0.842448	0.866071	-0.0236226	-0.0394353	0.000402306	0.897311	0.788903	0.0303621	0.941163	0.763859	0.0366627	0	0.915406	201082	0	0
576749	cg16902600	chr16	17027900	-	0.94124	0.949574	-0.00833382	-0.0125844	0.000403227	0.963102	0.912147	0.0137622	0.972146	0.913594	0.0144754	0	0.915406	361475	0	0
146787	cg11037649	chr3	81445096	-	0.955202	0.961443	-0.00624045	-0.00929762	0.000410011	0.969431	0.933055	0.00938399	0.989543	0.93585	0.0114408	0	0.915406	409842	0	0
467901	cg04163733	chr12	26207890	+	0.962189	0.975931	-0.0137424	-0.0202504	0.000411514	0.989546	0.881496	0.0237401	0.994547	0.939677	0.0134028	0	0.915406	289622	0	0
232579	cg13056654	chr5	151784352	+	0.962166	0.970236	-0.00807022	-0.0119268	0.000412587	0.978468	0.935099	0.00927305	0.984038	0.949125	0.0086368	0	0.915406	369933	0	0
355449	cg13538089	chr8	142365517	-	0.524253	0.471165	0.053088	0.150992	0.000413119	0.650667	0.364064	0.0783972	0.638891	0.288849	0.0849453	0	0.915406	48741	0	0
158527	cg00896370	chr3	147116807	-	0.329904	0.254388	0.0755161	0.362471	0.000414859	0.661893	0.183717	0.109537	0.515347	0.0722965	0.0879275	0	0.915406	4162	0	0
504940	cg01016203	chr13	44681967	-	0.914022	0.893205	0.0208175	0.0328746	0.00041573	0.964499	0.866266	0.0257433	0.949609	0.766543	0.0346284	0	0.915406	224047	0	0
476662	cg07262201	chr12	56617926	-	0.0149423	0.0194519	-0.00450959	-0.239766	0.00041626	0.0342339	0.00727555	0.0061413	0.0338947	0.0113422	0.00508884	0	0.915406	307845	0	0
32432	cg20818417	chr1	76082690	-	0.0416567	0.0537736	-0.0121169	-0.304004	0.000417505	0.104516	0.012083	0.0225979	0.0863168	0.0219474	0.015096	0	0.915406	124075	0	0
178392	cg06015562	chr4	24542131	-	0.878954	0.907933	-0.0289792	-0.0462805	0.00042	0.934942	0.513254	0.0791115	0.947379	0.835729	0.0247086	0	0.915406	181272	0	0
528285	cg01850934	chr14	68141664	-	0.0103778	0.0124524	-0.00207459	-0.139871	0.000421964	0.0196291	0.00224543	0.00462468	0.0242917	0.004095	0.00522799	0	0.915406	467059	0	0
107338	cg21465008	chr2	169312172	-	0.0955525	0.128657	-0.0331042	-0.393556	0.000423126	0.243193	0.0145436	0.0597728	0.499973	0.0231135	0.0848629	0	0.915406	17928	0	0
546324	cg06290138	chr15	38881520	-	0.893468	0.909526	-0.0160574	-0.025416	0.000425042	0.939379	0.83874	0.0257275	0.953707	0.871833	0.022203	0	0.915406	258073	0	0
382583	cg27467275	chr10	1245261	+	0.438592	0.366923	0.0716682	0.251131	0.0004267	0.656776	0.172782	0.124301	0.620319	0.112401	0.105919	0	0.915406	15797	0	0
266209	cg07043357	chr6	56913612	+	0.878955	0.9018	-0.0228454	-0.0366077	0.00042789	0.948168	0.799481	0.0344765	0.95465	0.832185	0.0277197	0	0.915406	210359	0	0
640036	cg16735685	chr18	8608634	-	0.746062	0.687443	0.0586192	0.11643	0.000428518	0.888972	0.617349	0.0744092	0.828675	0.502019	0.0739006	0	0.915406	72677	0	0
235772	cg12008764	chr5	170120755	+	0.726377	0.657356	0.0690209	0.141988	0.000430577	0.863835	0.420201	0.107208	0.869824	0.427535	0.10085	0	0.915406	54008	0	0
137256	cg21307697	chr3	45017012	-	0.0113806	0.0137227	-0.00234209	-0.149965	0.000431141	0.0207954	0.0075379	0.00303421	0.0212122	0.00728163	0.00316398	0	0.915406	443101	0	0
112869	cg22837714	chr2	198120525	-	0.0240988	0.0297226	-0.00562377	-0.220238	0.000432645	0.0401783	0.0110913	0.00675094	0.0417899	0.0168479	0.00645433	0	0.915406	262907	0	0
534340	cg16178358	chr14	90918443	+	0.381119	0.453275	-0.072156	-0.244261	0.00043271	0.538678	0.202685	0.0887984	0.659672	0.246611	0.0876811	0	0.915406	17156	0	0
405649	cg10022914	chr10	102494320	-	0.782579	0.730183	0.0523961	0.0986729	0.000435737	0.901693	0.606935	0.0649128	0.859009	0.370117	0.0831997	0	0.915406	90197	0	0
235711	cg00224471	chr5	169918864	-	0.851255	0.807639	0.0436168	0.0749778	0.000436719	0.922791	0.75794	0.043099	0.925378	0.517068	0.0763372	0	0.915406	122344	0	0
663884	cg21295413	chr19	15444837	+	0.0818475	0.106158	-0.0243107	-0.338779	0.000437201	0.19116	0.0222451	0.043546	0.317254	0.0261264	0.0553058	0	0.915406	40505	0	0
505949	cg04794607	chr13	48612295	-	0.00254543	0.0038627	-0.00131727	-0.144046	0.000439096	0.00809413	0.000200533	0.00228434	0.0183595	0.000113375	0.00352206	0	0.915406	547325	0	0
10376	cg08887581	chr1	16330716	-	0.861042	0.827327	0.0337149	0.0569509	0.000439419	0.937497	0.67573	0.068214	0.939568	0.645365	0.0593677	0	0.915406	155689	0	0
196952	cg25026700	chr4	159690965	+	0.0252241	0.0275317	-0.00230761	-0.0915472	0.000440217	0.062075	0.010421	0.0102364	0.0578945	0.0149105	0.00895595	0	0.915406	446088	0	0
721530	cg08981574	chr22	36878869	+	0.937484	0.901443	0.0360414	0.0559497	0.000440564	0.97585	0.881135	0.0218671	0.969185	0.690212	0.0609654	0	0.915406	157851	0	0
670511	cg25918726	chr19	36869377	-	0.0307838	0.0373176	-0.00653382	-0.214381	0.000440942	0.0622378	0.0129775	0.0107068	0.0664916	0.0186154	0.0117696	0	0.915406	233222	0	0
58530	cg04588745	chr1	204898044	+	0.901919	0.859602	0.0423164	0.0685494	0.000441031	0.964481	0.743267	0.05108	0.949636	0.643491	0.0623496	0	0.915406	133061	0	0
157151	cg23363832	chr3	139258939	+	0.0259554	0.0308374	-0.00488191	-0.183679	0.000441845	0.0630044	0.0100258	0.012867	0.062521	0.011199	0.00995335	0	0.915406	291507	0	0
392989	cg23812775	chr10	48416899	+	0.701811	0.643642	0.0581694	0.122994	0.000444018	0.852125	0.489995	0.0987741	0.878128	0.443882	0.0927393	0	0.915406	67319	0	0
45239	cg23008177	chr1	155036577	+	0.0288996	0.0358178	-0.0069182	-0.236153	0.00044411	0.0516865	0.0130204	0.00990036	0.0739753	0.0150804	0.0133124	0	0.915406	222356	0	0
271283	cg12631465	chr6	106787108	-	0.901742	0.885278	0.0164642	0.0262903	0.000449224	0.938727	0.852718	0.0234489	0.94699	0.789803	0.0341078	0	0.915406	253474	0	0
1101	cg04897188	chr1	1363291	+	0.0417023	0.0538001	-0.0120977	-0.303329	0.000449356	0.0835495	0.0122831	0.0142823	0.0877238	0.0217241	0.0172685	0	0.915406	124298	0	0
549384	cg06863152	chr15	45709844	+	0.948278	0.955727	-0.00744896	-0.0111711	0.000450433	0.98323	0.886743	0.0247242	0.985146	0.893729	0.0215394	0	0.915406	380230	0	0
570581	cg21345125	chr16	1925042	+	0.450366	0.366136	0.0842302	0.291528	0.000451697	0.688441	0.286514	0.109087	0.601602	0.0853043	0.107617	0	0.915406	9756	0	0
122741	cg17983742	chr2	235997423	+	0.872311	0.839942	0.0323688	0.0539225	0.000452974	0.920605	0.757581	0.0440651	0.921469	0.7303	0.0539098	0	0.915406	162248	0	0
581778	cg05606415	chr16	31168595	+	0.0998541	0.135182	-0.0353284	-0.402279	0.000456744	0.246495	0.019881	0.0490909	0.389356	0.0443025	0.0668371	0	0.915406	14477	0	0
493317	cg03543403	chr12	122710630	+	0.0115763	0.0153176	-0.0037413	-0.230693	0.000457152	0.024396	0.00264565	0.00465739	0.0281295	0.00627731	0.006081	0	0.915406	346349	0	0
411429	cg07302757	chr10	122942267	+	0.965064	0.953788	0.0112757	0.0167807	0.000457821	0.978666	0.944442	0.00968909	0.976902	0.885204	0.018211	0	0.915406	317360	0	0
304124	cg19955544	chr7	72772768	-	0.365369	0.315269	0.0500996	0.206675	0.000460021	0.597546	0.212626	0.0839095	0.490349	0.137104	0.0903097	0	0.915406	26377	0	0
476134	cg02261553	chr12	56119925	+	0.934535	0.922851	0.0116848	0.0179588	0.000462409	0.959804	0.903932	0.0157527	0.956234	0.854469	0.022772	0	0.915406	307236	0	0
80777	cg19410609	chr2	31541350	-	0.16684	0.216857	-0.0500168	-0.359337	0.000463193	0.355554	0.0266893	0.0921655	0.629959	0.026104	0.10879	0	0.915406	4306	0	0
270283	cg19140262	chr6	99380488	+	0.110049	0.136753	-0.026704	-0.289766	0.000463475	0.280617	0.0356239	0.0680604	0.360713	0.0237746	0.0723336	0	0.915406	32669	0	0
361835	cg17757450	chr9	29213087	+	0.037975	0.054122	-0.016147	-0.418535	0.000467003	0.102763	0.00607038	0.0197438	0.0907418	0.0143531	0.0191752	0	0.915406	83973	0	0
139187	cg22919115	chr3	48936584	+	0.47979	0.418752	0.0610383	0.192021	0.000467225	0.645638	0.322426	0.0739299	0.542133	0.213671	0.0740506	0	0.915406	31024	0	0
161776	cg14717170	chr3	164914471	-	0.0592842	0.0676701	-0.00838585	-0.164832	0.00047039	0.144573	0.0241243	0.0271156	0.172442	0.0295988	0.0290461	0	0.915406	186416	0	0
196242	cg25085369	chr4	155254016	-	0.0606324	0.083037	-0.0224046	-0.397475	0.000470759	0.109572	0.0186207	0.0229675	0.346345	0.0317327	0.0615873	0	0.915406	47775	0	0
469231	cg11109157	chr12	32051191	+	0.84148	0.789645	0.0518355	0.0906139	0.000473116	0.938165	0.696935	0.0570819	0.920174	0.614684	0.0715428	0	0.915406	99965	0	0
410934	cg24902461	chr10	121031392	-	0.106552	0.139133	-0.0325809	-0.355624	0.000473228	0.267002	0.0235188	0.0667055	0.478723	0.0358721	0.0843688	0	0.915406	18899	0	0
292076	cg17093088	chr7	6544329	+	0.0386069	0.0440287	-0.00542178	-0.152564	0.000476712	0.136018	0.0110666	0.0242316	0.110841	0.016989	0.0232209	0	0.915406	270270	0	0
212161	cg10850054	chr5	55290839	+	0.0176802	0.0206989	-0.00301866	-0.14933	0.000478098	0.0358624	0.00294214	0.0107548	0.0417118	0.00112158	0.00995146	0	0.915406	391138	0	0
137113	cg17092624	chr3	44690187	+	0.0445837	0.0515063	-0.00692258	-0.172264	0.000479656	0.0788312	0.0149951	0.0180361	0.126123	0.0229555	0.0218918	0	0.915406	222229	0	0
464168	cg15075897	chr12	7862691	+	0.937814	0.945647	-0.0078328	-0.0118735	0.000481943	0.966627	0.878798	0.0210996	0.979226	0.907097	0.01965	0	0.915406	370615	0	0
645593	cg03656833	chr18	46067547	+	0.0158421	0.018976	-0.00313387	-0.165134	0.000483273	0.0625481	0.00345836	0.0108824	0.027312	0.00728602	0.0048439	0	0.915406	383235	0	0
168544	cg05323324	chr3	194120023	+	0.109061	0.141942	-0.0328814	-0.351825	0.000483669	0.266417	0.0280866	0.0612599	0.4971	0.0436353	0.0811876	0	0.915406	18338	0	0
463371	cg12007420	chr12	6782601	-	0.979906	0.971696	0.00821012	0.0120154	0.000484541	0.990159	0.964148	0.00666282	0.99148	0.919665	0.0126918	0	0.915406	368773	0	0
282405	cg14723713	chr6	159513945	-	0.168209	0.216029	-0.0478207	-0.342943	0.00048666	0.376835	0.0274363	0.0935804	0.639323	0.0554268	0.114353	0	0.915406	5225	0	0
560479	cg04641171	chr15	79381805	-	0.0497844	0.0604307	-0.0106464	-0.236437	0.000486933	0.0820167	0.0258595	0.0124167	0.115019	0.0316579	0.0203729	0	0.915406	144956	0	0
318198	cg06650216	chr7	138145531	+	0.0106567	0.0139313	-0.00327456	-0.212287	0.000488159	0.0222262	0.00193335	0.00437056	0.0239072	0.00406786	0.00479945	0	0.915406	374084	0	0
98253	cg24304518	chr2	113299015	+	0.0947848	0.124038	-0.0292532	-0.355212	0.000489834	0.202136	0.0284739	0.0502553	0.391441	0.0324949	0.0637182	0	0.915406	25929	0	0
163070	cg04572021	chr3	171867297	-	0.914013	0.932362	-0.0183488	-0.0283679	0.000489968	0.971838	0.851299	0.0298243	0.971794	0.874761	0.0208901	0	0.915406	243390	0	0
142260	cg25118511	chr3	53926156	-	0.0146733	0.0186312	-0.00395788	-0.214637	0.000490091	0.0285957	0.0047356	0.00545317	0.0330018	0.0066699	0.00699733	0	0.915406	334723	0	0
192269	cg10731073	chr4	126237373	+	0.0171899	0.0217107	-0.00452088	-0.221903	0.000491874	0.0294944	0.00650576	0.00546592	0.0400993	0.0104334	0.00743298	0	0.915406	307335	0	0
233397	cg25267513	chr5	156708190	+	0.0844905	0.110318	-0.0258274	-0.348611	0.000494098	0.217241	0.036368	0.0439848	0.323275	0.0210667	0.0620428	0	0.915406	35379	0	0
546082	cg20891097	chr15	37391121	+	0.00953086	0.0111834	-0.00165251	-0.117177	0.000496603	0.0195721	0.00328234	0.00401293	0.023845	0.00377189	0.00456434	0	0.915406	509484	0	0
593810	cg20729586	chr16	83433871	-	0.798945	0.7187	0.0802442	0.150715	0.000498744	0.927027	0.551904	0.0998365	0.884001	0.339898	0.121454	0	0.915406	48900	0	0
616568	cg23776012	chr17	38821403	-	0.0991236	0.137914	-0.0387908	-0.438799	0.000498754	0.309789	0.0264237	0.0594278	0.465727	0.0399727	0.0819878	0	0.915406	10361	0	0
36660	cg12909559	chr1	100435310	+	0.0242453	0.0317712	-0.00752593	-0.286604	0.000500267	0.0435316	0.0116317	0.0075988	0.0564085	0.0159409	0.00823381	0	0.915406	206415	0	0
597269	cg09041941	chr16	87995931	+	0.945993	0.954968	-0.00897517	-0.0134813	0.000500533	0.973097	0.867583	0.0253685	0.993272	0.893014	0.0252512	0	0.915406	350857	0	0
166667	cg15282665	chr3	186704067	-	0.0912551	0.127192	-0.0359368	-0.438201	0.00050086	0.19859	0.0222944	0.0509392	0.364346	0.0368701	0.060721	0	0.915406	13643	0	0
362009	cg20827445	chr9	33001553	+	0.00694437	0.00914633	-0.00220196	-0.176262	0.000502298	0.0157163	3.8847e-05	0.00387823	0.0201305	3.8847e-05	0.00462388	0	0.915406	455417	0	0
109075	cg08638928	chr2	175352250	+	0.0133178	0.0172925	-0.00397473	-0.227075	0.000503881	0.0309312	0.00160402	0.00804708	0.0526048	0.00271429	0.0102746	0	0.915406	333880	0	0
593150	cg03406106	chr16	81254169	+	0.641022	0.577174	0.063848	0.148918	0.000505004	0.869379	0.413734	0.108073	0.822024	0.20027	0.12949	0	0.915406	49913	0	0
19993	cg03698781	chr1	35135423	+	0.444833	0.364179	0.0806541	0.281609	0.000506744	0.788217	0.217443	0.149564	0.75305	0.051656	0.164122	0	0.915406	11051	0	0
503299	cg24239329	chr13	36705622	+	0.0384184	0.0461255	-0.00770709	-0.213101	0.000507156	0.0729197	0.0158254	0.014639	0.134116	0.0149168	0.0239213	0	0.915406	201995	0	0
703807	cg04140932	chr20	61674143	-	0.86454	0.910696	-0.0461564	-0.0742011	0.000509186	0.933109	0.689576	0.0766749	0.956354	0.80845	0.034591	0	0.915406	123604	0	0
630711	cg18563987	chr17	73696509	-	0.92952	0.93715	-0.00762961	-0.0116685	0.000509584	0.952138	0.898987	0.0142683	0.969585	0.894113	0.015275	0	0.915406	373388	0	0
425550	cg13631318	chr11	13987766	+	0.798382	0.759021	0.0393606	0.0720136	0.000510048	0.884152	0.689496	0.0513922	0.878799	0.565221	0.0718933	0	0.915406	127070	0	0
269767	cg18683523	chr6	91297516	+	0.251406	0.202748	0.0486584	0.297149	0.000513591	0.465274	0.110188	0.110402	0.538903	0.0687047	0.109814	0	0.915406	9150	0	0
519647	cg27123665	chr14	24682303	+	0.0064699	0.00836193	-0.00189203	-0.156886	0.000516884	0.0145403	0.000761918	0.00355242	0.0224674	0.000220272	0.00476667	0	0.915406	484941	0	0
292844	cg06286300	chr7	12250161	-	0.00862315	0.0113308	-0.00270767	-0.195842	0.000518012	0.0221367	0.00101802	0.00535469	0.0247608	0.00292353	0.00484559	0	0.915406	413794	0	0
588491	cg16387762	chr16	67794288	+	0.107987	0.136538	-0.0285518	-0.312655	0.00052219	0.249287	0.0227017	0.0564788	0.418032	0.0263041	0.0708501	0	0.915406	27570	0	0
127290	cg09879868	chr2	242990445	+	0.674014	0.735015	-0.0610014	-0.123244	0.000522238	0.82631	0.39749	0.101785	0.891141	0.506434	0.0889925	0	0.915406	67114	0	0
450563	cg20912066	chr11	107436729	-	0.0112926	0.0149099	-0.00361726	-0.226365	0.000522444	0.0226074	0.00221833	0.00576929	0.0423663	0.00375402	0.00752019	0	0.915406	353295	0	0
441621	cg07786832	chr11	68353670	-	0.861118	0.871869	-0.0107508	-0.0176959	0.000522986	0.910352	0.723136	0.0454772	0.949921	0.713051	0.0488609	0	0.915406	309447	0	0
210663	cg24635834	chr5	42949919	+	0.0088179	0.0134305	-0.00461256	-0.31628	0.00052559	0.0245696	0.00119802	0.00526659	0.0395881	0.00174626	0.00911049	0	0.915406	303248	0	0
668525	cg11992021	chr19	33462723	+	0.0138339	0.0165295	-0.0026956	-0.154582	0.000528352	0.0277269	0.00211416	0.00749374	0.0350257	0.00335417	0.00630169	0	0.915406	414756	0	0
362824	cg00877580	chr9	35564877	+	0.94597	0.953858	-0.00788747	-0.0118545	0.000528877	0.966724	0.929253	0.00955776	0.970468	0.930503	0.00911859	0	0.915406	370874	0	0
31009	cg18271025	chr1	65775527	-	0.0191036	0.0223603	-0.00325674	-0.15303	0.000530444	0.0328809	0.00470896	0.00862225	0.043883	0.00880999	0.00823503	0	0.915406	375218	0	0
252375	cg23836509	chr6	30654747	+	0.016329	0.0192017	-0.00287272	-0.1494	0.000530486	0.029367	0.0070689	0.00697414	0.0312764	0.0083652	0.00574765	0	0.915406	401530	0	0
52671	cg06057398	chr1	179048483	-	0.0326498	0.0414386	-0.00878886	-0.270314	0.000531289	0.055027	0.0176323	0.0116092	0.0846673	0.0185656	0.0143339	0	0.915406	177915	0	0
71091	cg22802194	chr2	287359	-	0.0982533	0.115957	-0.0177034	-0.218517	0.00053244	0.216582	0.037425	0.0479201	0.238229	0.0503908	0.0523448	0	0.915406	72886	0	0
115542	cg18347209	chr2	208669062	-	0.0144273	0.0181467	-0.00371936	-0.20447	0.000532959	0.0277149	0.00290397	0.0077292	0.043278	0.00328621	0.0102422	0	0.915406	347539	0	0
610795	cg16897885	chr17	21280501	-	0.00950763	0.011687	-0.00217936	-0.152791	0.000536972	0.0183703	0.00223298	0.00435406	0.019723	0.00364565	0.00430801	0	0.915406	457413	0	0
459874	cg17582306	chr11	134241099	-	0.9165	0.927052	-0.010552	-0.0163381	0.000538862	0.950051	0.888088	0.014676	0.955008	0.898572	0.0147924	0	0.915406	321436	0	0
212454	cg10891939	chr5	56238376	+	0.964336	0.970175	-0.00583877	-0.00861964	0.000541647	0.978853	0.946676	0.00875483	0.985652	0.950238	0.00869273	0	0.915406	422135	0	0
629597	cg16557906	chr17	72436751	-	0.92964	0.941423	-0.0117823	-0.0179776	0.00054261	0.949588	0.869845	0.0161222	0.968397	0.910098	0.0148361	0	0.915406	307081	0	0
190883	cg15525489	chr4	114374589	-	0.0325256	0.0414702	-0.00894458	-0.275405	0.000545181	0.091121	0.00738336	0.0214788	0.150844	0.00597037	0.0248794	0	0.915406	174820	0	0
637382	cg08903441	chr17	80304981	+	0.0167984	0.0217308	-0.0049324	-0.243738	0.000545326	0.0269563	0.00544318	0.00616875	0.0658605	0.0108952	0.00988476	0	0.915406	289434	0	0
63359	cg23035715	chr1	223302710	+	0.0218356	0.0279198	-0.00608425	-0.252313	0.00054535	0.0357318	0.0118873	0.00590599	0.0549009	0.0116076	0.00945223	0	0.915406	247281	0	0
363424	cg14172603	chr9	37037526	+	0.0366788	0.0465919	-0.00991303	-0.277826	0.000545985	0.060611	0.00953471	0.0136298	0.0781443	0.0265048	0.0122261	0	0.915406	156968	0	0
54738	cg13065938	chr1	186344998	+	0.0213392	0.0263489	-0.00500979	-0.213947	0.000547296	0.0376199	0.0114345	0.00671052	0.0485152	0.0127362	0.00721805	0	0.915406	286388	0	0
116894	cg05160909	chr2	217381364	+	0.845282	0.81865	0.0266313	0.0456361	0.000548249	0.910472	0.787208	0.0342791	0.913933	0.549047	0.0669132	0	0.915406	183041	0	0
576041	cg03391173	chr16	13644390	-	0.912383	0.935485	-0.0231022	-0.0356889	0.000548773	0.957815	0.771067	0.0453504	0.971791	0.884539	0.0193097	0	0.915406	213637	0	0
296981	cg06133110	chr7	30028307	+	0.0755126	0.0953958	-0.0198832	-0.301608	0.00054893	0.195496	0.0154115	0.046454	0.276852	0.0278223	0.0497108	0	0.915406	60053	0	0
54069	cg09516108	chr1	183552756	+	0.09697	0.135085	-0.0381155	-0.439697	0.000550208	0.239552	0.0137135	0.0635438	0.525654	0.0164659	0.0898308	0	0.915406	11060	0	0
36152	cg26537280	chr1	95699037	-	0.363761	0.287629	0.076132	0.328601	0.000554006	0.567343	0.183477	0.115469	0.538037	0.120403	0.0951723	0	0.915406	6276	0	0
709764	cg08116738	chr21	40556477	+	0.0335703	0.0414223	-0.00785204	-0.23905	0.000554248	0.0793897	0.0068274	0.0178593	0.124255	0.014045	0.0193263	0	0.915406	198556	0	0
430063	cg09324712	chr11	35317407	+	0.83067	0.795363	0.0353064	0.0618993	0.000558948	0.91169	0.75387	0.039724	0.862784	0.670223	0.0524834	0	0.915406	145524	0	0
643769	cg08505728	chr18	32651831	+	0.564237	0.530466	0.0337714	0.0874434	0.000559548	0.700789	0.348722	0.0720789	0.698378	0.387024	0.0775436	0	0.915406	104042	0	0
608427	cg08826152	chr17	15869607	-	0.122345	0.155548	-0.0332032	-0.322947	0.00056032	0.278664	0.0335229	0.0646853	0.535189	0.0364698	0.0877819	0	0.915406	17768	0	0
245238	cg15223191	chr6	13668079	-	0.15709	0.204097	-0.0470072	-0.357641	0.000562052	0.346722	0.0341814	0.0864276	0.60735	0.0399569	0.112939	0	0.915406	4863	0	0
648207	cg14263230	chr18	59733858	+	0.903916	0.917341	-0.0134249	-0.0210382	0.000562112	0.953588	0.812535	0.0342076	0.970318	0.846121	0.0327674	0	0.915406	284039	0	0
282888	cg26112621	chr6	160875606	+	0.78519	0.820159	-0.0349687	-0.0620875	0.000562322	0.847735	0.651443	0.0538995	0.89738	0.715741	0.042541	0	0.915406	145147	0	0
652469	cg11683663	chr19	855536	+	0.793056	0.82866	-0.0356039	-0.0625852	0.000564113	0.888458	0.585426	0.0696342	0.949685	0.624972	0.0709246	0	0.915406	144196	0	0
187969	cg11982583	chr4	93225933	-	0.0156348	0.0199536	-0.00431882	-0.224627	0.000566669	0.0382778	0.00212601	0.00955958	0.0473665	0.00646014	0.00890407	0	0.915406	316715	0	0
176663	cg01536355	chr4	10624057	+	0.953012	0.962749	-0.009737	-0.0145138	0.000567241	0.970444	0.90932	0.0156532	0.988977	0.93556	0.00996692	0	0.915406	339381	0	0
639839	cg22774547	chr18	7084619	-	0.87365	0.84631	0.02734	0.0453419	0.000568851	0.956723	0.784453	0.0391858	0.917585	0.63052	0.0632018	0	0.915406	183851	0	0
370174	cg16149607	chr9	110918931	+	0.151093	0.199859	-0.0487656	-0.381524	0.000571832	0.346347	0.0404362	0.0771495	0.581407	0.0548508	0.100442	0	0.915406	4175	0	0
597057	cg21461308	chr16	87754019	+	0.956132	0.966679	-0.010547	-0.0156641	0.000572579	0.976108	0.92925	0.0132346	0.98729	0.935284	0.0131657	0	0.915406	327828	0	0
640444	cg19002094	chr18	9876550	-	0.856043	0.88149	-0.0254472	-0.0417802	0.000573842	0.937647	0.799489	0.0391274	0.937976	0.803093	0.03476	0	0.915406	193881	0	0
292972	cg12785342	chr7	12728890	+	0.930901	0.909674	0.0212274	0.032921	0.000574271	0.984392	0.881397	0.0294495	0.980603	0.749648	0.0481454	0	0.915406	223864	0	0
473642	cg01517968	chr12	52348879	+	0.0549299	0.071456	-0.0165261	-0.327138	0.000574729	0.130724	0.0131543	0.0344413	0.267757	0.0144283	0.0452382	0	0.915406	81009	0	0
34927	cg12456433	chr1	91869615	+	0.0934676	0.124386	-0.0309187	-0.377207	0.000577701	0.248686	0.028402	0.050419	0.342331	0.041045	0.0533536	0	0.915406	22205	0	0
257621	cg25535027	chr6	33169019	-	0.0756809	0.10158	-0.0258994	-0.381036	0.000578545	0.122759	0.0436637	0.0201193	0.364009	0.0478824	0.0540183	0	0.915406	35157	0	0
581911	cg20851120	chr16	31366406	+	0.0425881	0.0678002	-0.025212	-0.565036	0.000580951	0.0788184	0.0147503	0.0156811	0.196405	0.0215283	0.0394721	0	0.915406	37354	0	0
699984	cg07719602	chr20	52450360	-	0.133488	0.179866	-0.0463779	-0.40405	0.000581029	0.323707	0.0310982	0.0780895	0.565523	0.0246593	0.101784	0	0.915406	5124	0	0
198289	cg00150882	chr4	171011502	+	0.0738212	0.0866785	-0.0128574	-0.205881	0.000581641	0.228449	0.0149503	0.0436282	0.268833	0.0317652	0.0478398	0	0.915406	115168	0	0
131930	cg20271057	chr3	16974160	+	0.542892	0.478055	0.064837	0.179954	0.000583636	0.76887	0.375525	0.0953966	0.706727	0.300925	0.111799	0	0.915406	35364	0	0
724722	cg26336731	chr22	42016984	+	0.0206728	0.0252147	-0.00454196	-0.199221	0.000584148	0.0334838	0.0125469	0.00520011	0.0463502	0.0151533	0.0067969	0	0.915406	306419	0	0
583959	cg05545914	chr16	51167855	-	0.0403296	0.0777437	-0.037414	-0.801887	0.000584407	0.0934669	0.0130717	0.0155444	0.441743	0.0199262	0.0998668	0	0.915406	11813	0	0
27535	cg08736216	chr1	53307985	+	0.781785	0.711881	0.069904	0.133348	0.000585726	0.94487	0.611279	0.0839733	0.923186	0.295686	0.128327	0	0.915406	59644	0	0
257879	cg20762310	chr6	33239260	+	0.0119936	0.0149516	-0.00295793	-0.182044	0.000585876	0.0212409	0.00328696	0.00415617	0.0315976	0.00197133	0.00552164	0	0.915406	395377	0	0
21487	cg02309273	chr1	38412744	+	0.0455884	0.0625998	-0.0170114	-0.385181	0.000586221	0.12434	0.0122215	0.0222681	0.200947	0.0173203	0.0367322	0	0.915406	77553	0	0
12391	cg13242924	chr1	20364718	-	0.0866934	0.111341	-0.0246478	-0.32758	0.000586484	0.145012	0.0546402	0.0201381	0.190071	0.0630545	0.0312464	0	0.915406	39282	0	0
194349	cg13749822	chr4	145566663	-	0.23775	0.186073	0.0516775	0.337498	0.000587219	0.422591	0.128081	0.0748955	0.478003	0.0840904	0.0814667	0	0.915406	5608	0	0
223746	cg07897069	chr5	126564606	+	0.787274	0.742917	0.0443574	0.0825855	0.0005901	0.847783	0.677496	0.0524031	0.863792	0.607241	0.0700733	0	0.915406	110798	0	0
70771	cg22490229	chr1	248342534	-	0.641403	0.571857	0.0695461	0.162886	0.000590152	0.860003	0.459879	0.0972566	0.860748	0.22781	0.141539	0	0.915406	42678	0	0
184657	cg10248357	chr4	75230473	+	0.0272476	0.0361257	-0.00887806	-0.308422	0.000590192	0.0570651	0.00724892	0.0139205	0.0930242	0.0102545	0.0156229	0	0.915406	176129	0	0
63736	cg01561839	chr1	224521239	-	0.0145893	0.0178265	-0.00323727	-0.178433	0.000591548	0.0327806	3.64071e-06	0.00947661	0.0508433	0.00098618	0.0119831	0	0.915406	376459	0	0
302530	cg02929993	chr7	55195359	-	0.648549	0.559716	0.0888334	0.209049	0.000592009	0.828767	0.499499	0.0967525	0.752923	0.250941	0.118022	0	0.915406	25689	0	0
640912	cg16860267	chr18	11908803	-	0.0214622	0.0261422	-0.00468001	-0.200065	0.000594372	0.0417628	0.00641146	0.00783776	0.0365156	0.0117994	0.00694711	0	0.915406	300239	0	0
183765	cg18694877	chr4	69215901	+	0.0157007	0.0190651	-0.00336433	-0.177477	0.000595419	0.0287746	0.00291662	0.00603665	0.034823	0.00821374	0.00593218	0	0.915406	368441	0	0
374368	cg17038201	chr9	129185673	-	0.148333	0.170112	-0.0217788	-0.185931	0.00059695	0.3657	0.0330044	0.0794325	0.401978	0.0481784	0.0813859	0	0.915406	50567	0	0
387565	cg16781488	chr10	17688210	+	0.0230818	0.032334	-0.00925223	-0.35578	0.000599276	0.0501572	0.00106057	0.0105971	0.0933669	0.00857524	0.0180801	0	0.915406	168949	0	0
385473	cg15634806	chr10	10914213	+	0.523065	0.465389	0.057676	0.165203	0.000601201	0.6464	0.400986	0.0725579	0.589604	0.20953	0.0763509	0	0.915406	41538	0	0
365919	cg24852661	chr9	88715131	-	0.0419288	0.0558496	-0.0139208	-0.342639	0.000601446	0.0777434	0.0168545	0.0153593	0.203455	0.0182662	0.0316033	0	0.915406	103603	0	0
95945	cg17142183	chr2	102608192	+	0.171685	0.203327	-0.0316422	-0.231629	0.000602391	0.363308	0.0173472	0.0905787	0.4756	0.0462521	0.0857955	0	0.915406	20730	0	0
59103	cg06442372	chr1	205745707	-	0.896144	0.915633	-0.019489	-0.0307	0.000603314	0.953797	0.781793	0.0380684	0.987448	0.83257	0.0317332	0	0.915406	233008	0	0
49396	cg23011905	chr1	164756802	+	0.00986266	0.0142199	-0.00435723	-0.286133	0.000604756	0.024278	0.00259478	0.00562802	0.031822	0.00431567	0.00605724	0	0.915406	314903	0	0
179473	cg02564761	chr4	37246054	+	0.156681	0.105812	0.0508687	0.525302	0.000606266	0.478987	0.0608057	0.110498	0.195318	0.0497053	0.0340363	0	0.915406	3508	0	0
361166	cg11712806	chr9	20242420	+	0.0220468	0.0252538	-0.00320695	-0.137596	0.000608512	0.0484414	0.00624479	0.0120109	0.0568062	0.0110786	0.0119666	0	0.915406	378424	0	0
156683	cg23984908	chr3	137916634	-	0.943984	0.951768	-0.00778361	-0.0117233	0.000610248	0.978127	0.890588	0.0226074	0.983876	0.906107	0.0205339	0	0.915406	372630	0	0
114885	cg22308949	chr2	206628553	+	0.487456	0.412107	0.0753492	0.236961	0.000610657	0.736472	0.207281	0.110129	0.632049	0.156236	0.102588	0	0.915406	18708	0	0
583568	cg06751366	chr16	50280723	-	0.109779	0.138168	-0.0283897	-0.306866	0.000618893	0.277828	0.0359524	0.0556643	0.344057	0.0391476	0.0719009	0	0.915406	28043	0	0
454050	cg20001829	chr11	118402342	-	0.0296895	0.0298738	-0.000184272	-0.00668268	0.000619681	0.164627	0.00562183	0.0333387	0.110129	0.00814802	0.0217811	0	0.915406	702708	0	0
674584	cg07787407	chr19	44186169	+	0.136318	0.177975	-0.0416576	-0.361439	0.00061972	0.296117	0.0528247	0.0685073	0.482494	0.0438516	0.0896184	0	0.915406	7853	0	0
404703	cg15215842	chr10	99689996	+	0.74177	0.705993	0.0357775	0.0703469	0.000621015	0.830932	0.588256	0.0592487	0.841367	0.560976	0.0649123	0	0.915406	129920	0	0
407061	cg12730165	chr10	104562766	-	0.766233	0.73893	0.0273027	0.0516584	0.00062339	0.890964	0.655884	0.0586103	0.885988	0.629118	0.0564715	0	0.915406	167573	0	0
411942	cg11976790	chr10	124320064	+	0.0841827	0.106432	-0.0222497	-0.305959	0.000625872	0.168875	0.0140096	0.0464539	0.350227	0.045688	0.0556212	0	0.915406	48460	0	0
526664	cg01273287	chr14	62228901	-	0.00851818	0.0128454	-0.00432725	-0.302963	0.000629634	0.0207118	0.00203079	0.0049031	0.0209481	0.00197834	0.00496903	0	0.915406	316324	0	0
646583	cg23430415	chr18	51882163	+	0.452823	0.435482	0.0173402	0.055091	0.000630051	0.617714	0.344742	0.0672259	0.691659	0.24699	0.103332	0	0.915406	159720	0	0
73385	cg03271293	chr2	6920924	-	0.0713068	0.0924227	-0.0211159	-0.333088	0.000631882	0.209619	0.0207039	0.0370507	0.242087	0.0248904	0.0479838	0	0.915406	53669	0	0
705389	cg17530754	chr21	16431021	-	0.11043	0.141264	-0.0308347	-0.328881	0.000632266	0.207074	0.0432351	0.0450542	0.417531	0.0463054	0.063345	0	0.915406	22394	0	0
14770	cg03893656	chr1	24745138	+	0.938849	0.923532	0.0153175	0.0234799	0.000632508	0.961358	0.918767	0.0135944	0.960203	0.810412	0.0291557	0	0.915406	268822	0	0
318757	cg19677733	chr7	139642893	-	0.938108	0.929503	0.00860505	0.0131537	0.000632713	0.97438	0.865916	0.0257305	0.969344	0.86752	0.0233678	0	0.915406	354642	0	0
209582	cg11669284	chr5	37721782	-	0.290373	0.357466	-0.0670938	-0.290859	0.000633531	0.403797	0.186076	0.0557828	0.520071	0.204285	0.0697551	0	0.915406	9838	0	0
466432	cg05214546	chr12	15941507	-	0.0110203	0.0151985	-0.00417825	-0.261558	0.000633679	0.0241737	0.00279066	0.00644163	0.0314271	0.00347838	0.00675746	0	0.915406	323415	0	0
369303	cg12348501	chr9	102587600	-	0.0780401	0.0963035	-0.0182634	-0.271956	0.000633752	0.202857	0.0265456	0.0429023	0.23446	0.0273886	0.045773	0	0.915406	69253	0	0
71526	cg09581060	chr2	928673	-	0.794305	0.737659	0.0566466	0.105363	0.00063583	0.94114	0.399927	0.119218	0.935269	0.42434	0.099979	0	0.915406	83009	0	0
650483	cg16604566	chr18	74845829	+	0.150903	0.191709	-0.0408064	-0.326087	0.000635855	0.342201	0.0254615	0.0825834	0.515528	0.0296126	0.0945188	0	0.915406	8526	0	0
409830	cg09004198	chr10	116726961	-	0.156618	0.195814	-0.039196	-0.304797	0.000636931	0.391573	0.0524092	0.0808193	0.537188	0.0596459	0.0920956	0	0.915406	9960	0	0
706139	cg15707568	chr21	27108736	+	0.0359295	0.0454015	-0.009472	-0.270504	0.000637452	0.0799471	0.00655043	0.0177643	0.0741674	0.0203792	0.0143227	0	0.915406	164803	0	0
521721	cg23157239	chr14	36684553	-	0.851557	0.899929	-0.0483713	-0.0788065	0.000637539	0.950736	0.570309	0.103275	0.960944	0.827176	0.0323002	0	0.915406	116363	0	0
208720	cg25113391	chr5	33825223	+	0.959668	0.95202	0.00764715	0.0114227	0.000638903	0.97173	0.938481	0.0087539	0.972129	0.913483	0.0144434	0	0.915406	376694	0	0
660061	cg01205324	chr19	10138615	+	0.0321991	0.0422076	-0.0100085	-0.307047	0.000640582	0.0542822	0.0166036	0.00933704	0.0676929	0.0277696	0.0108103	0	0.915406	155357	0	0
229034	cg00888801	chr5	140806126	+	0.892567	0.85144	0.0411263	0.0672826	0.000645505	0.966894	0.688977	0.0605085	0.948667	0.70276	0.076218	0	0.915406	135364	0	0
513144	cg23704517	chr13	109147317	-	0.378908	0.312873	0.0660344	0.26846	0.000646026	0.715808	0.217994	0.119885	0.502302	0.148737	0.0827607	0	0.915406	12803	0	0
372262	cg01227774	chr9	121502642	-	0.944761	0.955671	-0.0109103	-0.0163925	0.000646492	0.965082	0.908324	0.0142093	0.988573	0.903095	0.0151619	0	0.915406	320919	0	0
283915	cg00237489	chr6	166511686	-	0.0177629	0.0241644	-0.00640153	-0.299337	0.000647546	0.0281887	0.00850823	0.00445701	0.0531726	0.0106765	0.0103299	0	0.915406	237177	0	0
667042	cg15160859	chr19	19739800	+	0.216904	0.267701	-0.0507967	-0.291448	0.000647681	0.427761	0.0611039	0.0942352	0.539367	0.0676269	0.107011	0	0.915406	9768	0	0
98892	cg12666279	chr2	115918745	-	0.0508962	0.0610293	-0.0101331	-0.222062	0.000647737	0.100507	0.0209636	0.019688	0.103754	0.0261428	0.0192238	0	0.915406	153229	0	0
436233	cg13678939	chr11	62414063	+	0.0105178	0.0140865	-0.00356871	-0.23135	0.000648502	0.0200593	0.00164396	0.00472965	0.0249208	0.00472581	0.00513959	0	0.915406	356117	0	0
295389	cg11505855	chr7	26228516	-	0.949069	0.960571	-0.0115021	-0.0171992	0.000650547	0.987638	0.870574	0.0270962	0.989039	0.917021	0.0156116	0	0.915406	313699	0	0
359644	cg21184111	chr9	4792285	+	0.0178318	0.0246009	-0.00676909	-0.314075	0.000654924	0.0349491	0.00746386	0.00700799	0.0460698	0.00657989	0.00947184	0	0.915406	226478	0	0
39512	cg05439713	chr1	113384082	-	0.914206	0.884137	0.030069	0.0477185	0.000656232	0.954326	0.860497	0.026258	0.94977	0.729787	0.0488219	0	0.915406	177417	0	0
617054	cg13249593	chr17	39705234	+	0.0362345	0.0420904	-0.00585588	-0.172047	0.000657882	0.0592525	0.0165888	0.00964305	0.0697998	0.023496	0.0108824	0	0.915406	254855	0	0
650810	cg15180899	chr18	76536472	+	0.945208	0.918052	0.0271556	0.0416087	0.000658462	0.970153	0.89245	0.0180362	0.961411	0.655125	0.0524929	0	0.915406	194409	0	0
104160	cg26782884	chr2	148804219	-	0.967314	0.972606	-0.00529217	-0.00779115	0.000659978	0.983638	0.947987	0.00803506	0.989193	0.950837	0.00849152	0	0.915406	438762	0	0
36153	cg03123541	chr1	95699097	+	0.50146	0.397569	0.103891	0.327576	0.000660454	0.745894	0.253111	0.131155	0.727356	0.146432	0.129909	0	0.915406	6354	0	0
167010	cg07718431	chr3	187754372	-	0.490108	0.634328	-0.14422	-0.365555	0.000660604	0.950436	0.174399	0.213653	0.938687	0.204035	0.202527	0	0.915406	3991	0	0
704095	cg21688209	chr20	61940917	-	0.405634	0.325046	0.0805878	0.310954	0.000662493	0.59939	0.295921	0.0861172	0.629514	0.109497	0.108343	0	0.915406	7727	0	0
257488	cg09502339	chr6	33152642	-	0.952046	0.932651	0.0193943	0.0293811	0.000662989	0.976269	0.914967	0.0144675	0.962811	0.739751	0.0377689	0	0.915406	238786	0	0
327845	cg12074090	chr8	6360436	+	0.860401	0.874681	-0.01428	-0.0234771	0.000664828	0.902194	0.789994	0.0329064	0.919208	0.81022	0.0304965	0	0.915406	268834	0	0
205748	cg23253678	chr5	9117275	-	0.960083	0.966548	-0.00646488	-0.00958258	0.00066559	0.984939	0.94143	0.0117102	0.989402	0.934523	0.0114622	0	0.915406	404897	0	0
701924	cg12058843	chr20	57844021	-	0.685442	0.602087	0.0833547	0.184193	0.000665611	0.849894	0.437867	0.129537	0.891246	0.27791	0.153802	0	0.915406	33766	0	0
687861	cg16390637	chr20	10469253	-	0.167784	0.210369	-0.0425849	-0.309795	0.000666336	0.405054	0.0277877	0.0955814	0.584714	0.046977	0.109227	0	0.915406	7828	0	0
681488	cg19717326	chr19	54370016	+	0.788319	0.752402	0.0359171	0.0664136	0.000667385	0.857883	0.666403	0.0426324	0.867366	0.562481	0.070756	0	0.915406	136875	0	0
148337	cg11364645	chr3	101405397	+	0.00800819	0.0102198	-0.00221166	-0.167119	0.000667423	0.0157334	0.0033802	0.00319994	0.0193404	0.00401673	0.00377215	0	0.915406	454546	0	0
564726	cg06534464	chr15	93122918	-	0.945046	0.929324	0.015722	0.0239473	0.000667621	0.970153	0.906796	0.0180636	0.976052	0.855287	0.0272921	0	0.915406	266178	0	0
549064	cg09511690	chr15	44969539	+	0.761908	0.726402	0.0355068	0.0679369	0.000667835	0.862131	0.600754	0.0695149	0.848297	0.558501	0.076091	0	0.915406	134181	0	0
509372	cg26894033	chr13	79964800	+	0.941601	0.917585	0.0240163	0.0368778	0.000668123	0.988555	0.841346	0.038232	0.983051	0.741497	0.0500391	0	0.915406	209441	0	0
404175	cg01432110	chr10	98832638	+	0.00775317	0.0113654	-0.00361223	-0.2672	0.000669729	0.0183341	0.00187856	0.00359237	0.0519952	0.00267262	0.00898168	0	0.915406	353591	0	0
257648	cg15854333	chr6	33171765	-	0.960336	0.967699	-0.00736348	-0.0109067	0.000669867	0.977481	0.939178	0.0104091	0.982867	0.941502	0.00901561	0	0.915406	384112	0	0
680544	cg25936889	chr19	52073990	-	0.752446	0.825783	-0.0733373	-0.132494	0.000671388	0.898422	0.596652	0.0826596	0.95999	0.633034	0.0879018	0	0.915406	60241	0	0
221784	cg12299942	chr5	114657399	-	0.973101	0.977689	-0.00458808	-0.00671732	0.000672265	0.984228	0.954713	0.00777237	0.994733	0.960105	0.00667558	0	0.915406	462756	0	0
533059	cg12382960	chr14	81672132	-	0.944167	0.955211	-0.0110437	-0.0166021	0.000673184	0.971181	0.895451	0.0187115	0.975787	0.922175	0.0136344	0	0.915406	318967	0	0
381700	cg19082416	chr10	323260	+	0.930539	0.917226	0.0133131	0.0205669	0.000673893	0.965497	0.850937	0.0274414	0.9597	0.8018	0.028143	0	0.915406	287331	0	0
590442	cg27207776	chr16	71393801	-	0.651866	0.598689	0.0531765	0.120833	0.000674314	0.789042	0.526778	0.0703689	0.725275	0.46113	0.0807568	0	0.915406	69049	0	0
83196	cg17818731	chr2	43295753	+	0.760335	0.716361	0.0439742	0.0847996	0.00067859	0.847359	0.633071	0.0543351	0.859503	0.425928	0.0869718	0	0.915406	107605	0	0
429114	cg25848520	chr11	32619691	+	0.89341	0.908088	-0.0146787	-0.0232526	0.000679778	0.958125	0.828541	0.0295499	0.961641	0.859496	0.0245759	0	0.915406	270205	0	0
249890	cg14268557	chr6	28874547	+	0.28649	0.353944	-0.0674535	-0.295731	0.000681217	0.499971	0.0987906	0.107754	0.704962	0.1459	0.110402	0	0.915406	9288	0	0
29040	cg23237472	chr1	56940113	+	0.984662	0.978556	0.00610575	0.0088833	0.00068291	0.991447	0.979107	0.00376759	0.989907	0.940392	0.00936214	0	0.915406	417219	0	0
349729	cg20519373	chr8	119456570	-	0.507884	0.452962	0.0549227	0.161737	0.000684445	0.794857	0.284334	0.120252	0.766147	0.255444	0.101446	0	0.915406	43240	0	0
118984	cg22888848	chr2	222320536	-	0.515138	0.486113	0.0290246	0.0820266	0.000685328	0.620683	0.390163	0.0618696	0.643812	0.323276	0.0782282	0	0.915406	111642	0	0
225751	cg00520708	chr5	134181266	-	0.0416339	0.0525001	-0.0108662	-0.27554	0.000686772	0.0847184	0.0144261	0.0167675	0.088955	0.0187763	0.0177128	0	0.915406	141615	0	0
90736	cg01207951	chr2	74208655	+	0.0574638	0.0706988	-0.013235	-0.258433	0.000687237	0.120187	0.0150634	0.0305465	0.186164	0.0309654	0.0349778	0	0.915406	110929	0	0
474597	cg15734706	chr12	53614080	+	0.0226948	0.0263003	-0.00360547	-0.150919	0.000689901	0.0407047	0.00810235	0.0103449	0.0461345	0.00667891	0.00919163	0	0.915406	353991	0	0
441934	cg17299921	chr11	68773204	-	0.882369	0.920603	-0.0382343	-0.0605259	0.00069074	0.944319	0.501521	0.0878816	0.966549	0.82792	0.0301491	0	0.915406	148373	0	0
295491	cg12135543	chr7	26428126	-	0.0502212	0.0794109	-0.0291897	-0.57018	0.00069164	0.104337	0.0126625	0.0264191	0.200182	0.0133598	0.044854	0	0.915406	26055	0	0
342265	cg24577279	chr8	72274203	+	0.00829126	0.0112268	-0.00293551	-0.214731	0.000691761	0.0199507	0.00191077	0.00450402	0.0256038	0.000361435	0.00571827	0	0.915406	396940	0	0
323193	cg16798617	chr7	155474109	+	0.943235	0.951464	-0.00822905	-0.012401	0.000693326	0.971465	0.902035	0.0150558	0.980402	0.917766	0.0157734	0	0.915406	363760	0	0
244416	cg13351621	chr6	10952381	+	0.859131	0.879698	-0.0205665	-0.0337412	0.000694964	0.925372	0.719313	0.0439713	0.95523	0.738476	0.0385616	0	0.915406	220732	0	0
219658	cg07651551	chr5	96191390	-	0.136819	0.17765	-0.0408303	-0.354	0.000694988	0.328317	0.0225561	0.0759637	0.539674	0.0380159	0.0960596	0	0.915406	8510	0	0
35822	cg14185291	chr1	94703340	+	0.0463128	0.0561927	-0.00987987	-0.233208	0.000696279	0.0989942	0.0217676	0.0178825	0.128815	0.017629	0.0226838	0	0.915406	157515	0	0
225837	cg02037307	chr5	134363562	-	0.20558	0.128717	0.0768624	0.636075	0.000699932	0.582259	0.0545236	0.114614	0.340805	0.0488526	0.061676	0	0.915406	532	0	0
466870	cg16726532	chr12	19692444	+	0.67261	0.631206	0.0414039	0.0902734	0.000706733	0.766642	0.554026	0.0630775	0.761803	0.333644	0.089681	0	0.915406	100394	0	0
432345	cg01502396	chr11	46403923	-	0.032562	0.0314979	0.00106408	0.0365271	0.000707187	0.130141	0.0141736	0.0242688	0.0629496	0.00500192	0.0130597	0	0.915406	578580	0	0
488034	cg22742001	chr12	110435418	+	0.147152	0.192129	-0.044977	-0.363115	0.000708123	0.326468	0.0444459	0.0830906	0.577279	0.0374153	0.103776	0	0.915406	5802	0	0
671288	cg17252697	chr19	38754707	+	0.0870092	0.113193	-0.0261835	-0.344723	0.000710593	0.209777	0.0336607	0.0447098	0.31987	0.0355918	0.0599381	0	0.915406	34272	0	0
302867	cg06751394	chr7	56120127	-	0.0271345	0.0330146	-0.00588004	-0.212064	0.000710853	0.0494103	0.00576016	0.0125125	0.097432	0.00293764	0.0200347	0	0.915406	254064	0	0
624015	cg14110086	chr17	53827579	+	0.926872	0.93437	-0.00749829	-0.0115007	0.000712339	0.957604	0.88434	0.0206694	0.987602	0.833144	0.0293011	0	0.915406	375613	0	0
709206	cg16320339	chr21	38740894	+	0.0107496	0.0136842	-0.00293469	-0.190847	0.000712363	0.0213391	0.00433611	0.00389609	0.0274996	0.00568353	0.00449315	0	0.915406	397016	0	0
639319	cg00024377	chr18	3666162	-	0.383271	0.321232	0.0620385	0.24768	0.000712657	0.652715	0.169797	0.111753	0.536941	0.201831	0.0765638	0	0.915406	16463	0	0
333379	cg12743692	chr8	26495000	-	0.937797	0.921171	0.0166258	0.0255317	0.000716345	0.966066	0.857541	0.0249194	0.968048	0.707216	0.0474053	0	0.915406	257433	0	0
486258	cg03607813	chr12	105948248	+	0.671637	0.549582	0.122055	0.284654	0.00071659	0.900183	0.332493	0.13858	0.850353	0.219849	0.146682	0	0.915406	10626	0	0
156322	cg19598924	chr3	136262383	+	0.178588	0.235364	-0.0567763	-0.379687	0.000716775	0.381669	0.0462764	0.0923847	0.742958	0.044729	0.124146	0	0.915406	3380	0	0
212014	cg25013550	chr5	54830529	-	0.0131758	0.0158965	-0.00272061	-0.160133	0.000717277	0.0249365	0.00498208	0.00532981	0.0338323	0.00535077	0.00543432	0	0.915406	412808	0	0
203920	cg00243313	chr5	1883413	-	0.008437	0.0106111	-0.00217415	-0.160821	0.000719965	0.0191163	0.00337752	0.00407254	0.0184542	0.00254955	0.00338716	0	0.915406	457830	0	0
143007	cg10185277	chr3	57486443	-	0.822061	0.77783	0.0442312	0.0788053	0.000721033	0.916747	0.631807	0.0680435	0.923027	0.617549	0.0763559	0	0.915406	116367	0	0
495649	cg05761732	chr12	128124963	+	0.593505	0.647315	-0.0538096	-0.123218	0.000721772	0.714642	0.383349	0.0720592	0.772437	0.464482	0.0751434	0	0.915406	67138	0	0
149546	cg19148281	chr3	111577973	+	0.0373565	0.0549543	-0.0175978	-0.455861	0.000721883	0.0789412	0.0110572	0.016533	0.190547	0.0171136	0.0296555	0	0.915406	73522	0	0
479283	cg10515616	chr12	66251493	+	0.90159	0.88273	0.01886	0.0301612	0.000722032	0.946869	0.82351	0.0308919	0.933062	0.795643	0.0327323	0	0.915406	235335	0	0
577196	cg05335886	chr16	19421979	-	0.0311043	0.0373299	-0.00622566	-0.203464	0.000722563	0.0698089	0.01207	0.0138589	0.087955	0.0172209	0.0161886	0	0.915406	242757	0	0
428482	cg05756220	chr11	30038685	+	0.0884966	0.112295	-0.0237982	-0.312218	0.000723854	0.244447	0.0330826	0.0530896	0.30461	0.0222071	0.0613071	0	0.915406	42351	0	0
330870	cg02854313	chr8	19409023	-	0.423454	0.518255	-0.094801	-0.285355	0.000727979	0.653729	0.208185	0.119732	0.7593	0.17263	0.159073	0	0.915406	10524	0	0
602058	cg14511746	chr17	2287008	+	0.877767	0.88998	-0.0122126	-0.0197112	0.000728046	0.95114	0.779034	0.047366	0.957993	0.768607	0.0506227	0	0.915406	293518	0	0
117142	cg16815563	chr2	218083568	+	0.10558	0.138232	-0.0326523	-0.358969	0.000728606	0.274537	0.0254755	0.0623333	0.454602	0.0385115	0.0760937	0	0.915406	18765	0	0
401375	cg23170988	chr10	88720216	-	0.546039	0.494513	0.0515261	0.140295	0.000730133	0.739795	0.404974	0.0747772	0.651037	0.308883	0.0874422	0	0.915406	55080	0	0
485783	cg11533139	chr12	104502735	+	0.104175	0.130643	-0.0264674	-0.300785	0.000735408	0.235232	0.035152	0.053923	0.407205	0.034528	0.0702995	0	0.915406	33402	0	0
338499	cg00549815	chr8	50279552	-	0.0300584	0.0400882	-0.0100298	-0.322366	0.000735682	0.0594725	0.0118987	0.0122604	0.0735949	0.0185363	0.0160789	0	0.915406	155003	0	0
434652	cg00187686	chr11	59634218	-	0.0944421	0.124482	-0.0300402	-0.364713	0.000737007	0.245982	0.0191513	0.0553436	0.482137	0.0195747	0.083494	0	0.915406	24094	0	0
602322	cg09981407	chr17	2699505	-	0.00884566	0.0114393	-0.00259367	-0.186028	0.00073838	0.0173686	0.00278397	0.00315291	0.0187728	0.0043583	0.00411927	0	0.915406	422637	0	0
345296	cg06241915	chr8	95106865	+	0.957155	0.945663	0.0114926	0.017246	0.000741257	0.981365	0.925717	0.0154271	0.971792	0.864479	0.0202202	0	0.915406	313311	0	0
219481	cg03763570	chr5	95768016	+	0.0371902	0.0562508	-0.0190605	-0.489449	0.000741345	0.0778595	0.0166092	0.0152858	0.256599	0.0172127	0.0427647	0	0.915406	64465	0	0
198891	cg23697278	chr4	175750510	+	0.0437674	0.0569718	-0.0132044	-0.316822	0.000742408	0.0734629	0.0158601	0.0150593	0.165113	0.0215788	0.0278101	0	0.915406	111247	0	0
682117	cg21687671	chr19	55177654	-	0.628126	0.577396	0.05073	0.119508	0.000743392	0.796633	0.456886	0.0962134	0.711616	0.230182	0.100388	0	0.915406	70113	0	0
341475	cg00528502	chr8	67624233	+	0.068481	0.0896407	-0.0211597	-0.344392	0.000744256	0.173937	0.0148253	0.0416117	0.257181	0.0188563	0.0497527	0	0.915406	53473	0	0
292928	cg20213869	chr7	12624653	-	0.0341976	0.0298216	0.00437601	0.150417	0.000744351	0.0764139	0.0136274	0.0144971	0.10097	0.00839797	0.0168554	0	0.915406	314097	0	0
622206	cg21448507	chr17	47653220	-	0.0148107	0.0187714	-0.00396072	-0.213674	0.000744419	0.0291293	0.00359985	0.00664576	0.0345328	0.00397733	0.00677251	0	0.915406	334556	0	0
140734	cg25149428	chr3	50653397	-	0.00985771	0.0120019	-0.00214416	-0.147927	0.000744524	0.0192713	0.00400481	0.00342744	0.0228729	0.0063316	0.00353153	0	0.915406	460626	0	0
36150	cg20701556	chr1	95698924	+	0.655646	0.547458	0.108188	0.255892	0.000744688	0.852683	0.419015	0.130084	0.758225	0.212754	0.122604	0	0.915406	14892	0	0
699475	cg04516539	chr20	50112854	+	0.144269	0.193034	-0.0487651	-0.396273	0.000745333	0.306819	0.0429136	0.0751222	0.61629	0.0258097	0.107784	0	0.915406	4178	0	0
32275	cg13341453	chr1	75139583	+	0.018719	0.0218968	-0.00317775	-0.151404	0.000745493	0.0618155	0.00552671	0.0122594	0.0532089	0.00508486	0.00943696	0	0.915406	380288	0	0
170035	cg11218619	chr3	197144458	+	0.697245	0.64527	0.0519748	0.11012	0.000746638	0.854026	0.530629	0.0861558	0.763253	0.487349	0.064075	0	0.915406	78361	0	0
628607	cg06283733	chr17	70117125	-	0.0360852	0.0526386	-0.0165534	-0.442749	0.000746834	0.0726331	0.0146798	0.0154025	0.20837	0.0213689	0.0311375	0	0.915406	80805	0	0
68729	cg02215217	chr1	240457920	+	0.603648	0.553642	0.0500062	0.122633	0.000747702	0.875283	0.420102	0.128682	0.818433	0.200028	0.132966	0	0.915406	67609	0	0
696718	cg21482942	chr20	44033595	-	0.866076	0.810549	0.0555271	0.0944667	0.000749499	0.961812	0.750641	0.0453398	0.933422	0.485686	0.0876129	0	0.915406	95194	0	0
419228	cg07546654	chr11	1320546	+	0.137691	0.17556	-0.0378695	-0.329309	0.000751408	0.353598	0.0413186	0.0883583	0.596876	0.0258098	0.103945	0	0.915406	11308	0	0
623217	cg24879395	chr17	48785255	+	0.00965324	0.0130192	-0.003366	-0.228073	0.000754888	0.0169433	0.0037612	0.00367912	0.0220525	0.00290075	0.00525621	0	0.915406	368338	0	0
690885	cg01239044	chr20	25341751	+	0.151601	0.190405	-0.0388047	-0.310488	0.000759273	0.343692	0.0317256	0.0817133	0.599964	0.0531501	0.105417	0	0.915406	10349	0	0
162880	cg09467433	chr3	171283606	-	0.182476	0.233517	-0.0510407	-0.339341	0.000762129	0.392243	0.0246016	0.104852	0.678875	0.0447879	0.121058	0	0.915406	5472	0	0
545634	cg27532847	chr15	35047401	+	0.0295235	0.0381116	-0.00858814	-0.283675	0.00076217	0.0520919	0.00811174	0.0117619	0.131861	0.015849	0.0196597	0	0.915406	182043	0	0
229522	cg17347828	chr5	141514357	+	0.131657	0.164738	-0.0330807	-0.302789	0.000766465	0.303174	0.0508658	0.0767466	0.44719	0.0364934	0.0862215	0	0.915406	17967	0	0
663876	cg09483223	chr19	15434462	-	0.0250594	0.041781	-0.0167216	-0.562622	0.00076725	0.0457809	0.0101956	0.0105327	0.13839	0.00612047	0.0315697	0	0.915406	79537	0	0
677378	cg18655633	chr19	48107418	+	0.645304	0.583523	0.0617814	0.142861	0.000772024	0.801294	0.432781	0.107015	0.746069	0.224988	0.110635	0	0.915406	53456	0	0
527747	cg17049213	chr14	65710636	-	0.853472	0.795908	0.0575641	0.0995345	0.000774094	0.920434	0.71145	0.0480739	0.885524	0.550704	0.0811161	0	0.915406	89255	0	0
119439	cg24428758	chr2	224467086	+	0.0495627	0.0594326	-0.00986985	-0.221203	0.000774356	0.087682	0.0214655	0.0163424	0.112954	0.0238757	0.01886	0	0.915406	157674	0	0
145729	cg11048965	chr3	71592767	-	0.157787	0.198777	-0.0409905	-0.315336	0.000775005	0.29546	0.0581323	0.0608451	0.491348	0.0569503	0.0866271	0	0.915406	8398	0	0
76388	cg03002352	chr2	17699688	+	0.0847849	0.113341	-0.028556	-0.379922	0.00077581	0.153493	0.0463514	0.0286371	0.215918	0.0520778	0.0468196	0	0.915406	27559	0	0
48903	cg16879796	chr1	162280412	+	0.139789	0.178161	-0.0383722	-0.329038	0.000776746	0.334771	0.0177558	0.0747443	0.50333	0.0487531	0.0899115	0	0.915406	10806	0	0
566633	cg01757121	chr15	100539545	-	0.631799	0.579374	0.0524249	0.122938	0.000780636	0.802227	0.464533	0.0876319	0.768339	0.282389	0.0999895	0	0.915406	67369	0	0
237690	cg01284438	chr5	175250977	-	0.841642	0.788661	0.0529807	0.0926632	0.000782262	0.968031	0.666014	0.0908336	0.967911	0.635207	0.0902526	0	0.915406	97373	0	0
219117	cg15078071	chr5	94417312	+	0.0287296	0.040012	-0.0112824	-0.368837	0.000782485	0.0859338	0.00216495	0.0190489	0.085576	0.0128485	0.0171513	0	0.915406	135438	0	0
6353	cg01438390	chr1	8166942	+	0.240989	0.288252	-0.0472629	-0.248907	0.000782968	0.534204	0.0614358	0.110417	0.625671	0.105099	0.116652	0	0.915406	16224	0	0
76906	cg00261781	chr2	20212517	+	0.0144242	0.0197082	-0.00528393	-0.282546	0.000783528	0.0252153	0.00197573	0.00645885	0.0311833	0.00707802	0.00686745	0	0.915406	275469	0	0
629989	cg12483561	chr17	72920385	+	0.0314495	0.0382278	-0.00677832	-0.218511	0.000783769	0.119854	0.00613029	0.0217389	0.06493	0.0161549	0.0126382	0	0.915406	226219	0	0
244990	cg03647563	chr6	12963453	+	0.0112581	0.0145088	-0.00325067	-0.205285	0.00078435	0.0277024	0.00172068	0.00713206	0.0269748	0.00513849	0.00531471	0	0.915406	375607	0	0
522740	cg22124262	chr14	45649608	-	0.733693	0.761879	-0.0281857	-0.053667	0.000784381	0.812104	0.674903	0.0392934	0.893919	0.599012	0.0587082	0	0.915406	162815	0	0
327230	cg20625874	chr8	1891712	+	0.879065	0.851918	0.0271471	0.0447385	0.000785407	0.91841	0.804388	0.0251586	0.905787	0.670906	0.0445724	0	0.915406	185432	0	0
699600	cg23117699	chr20	50416976	+	0.0119133	0.0155738	-0.00366054	-0.222862	0.000786469	0.0215611	0.00330037	0.00511177	0.0307652	0.00630677	0.0060841	0	0.915406	350751	0	0
602445	cg03093944	chr17	2919407	-	0.98004	0.984664	-0.00462477	-0.00672357	0.000789911	0.993071	0.965627	0.00690083	0.993833	0.971994	0.00505709	0	0.915406	462607	0	0
430128	cg04948929	chr11	35507505	+	0.0216085	0.0271707	-0.00556217	-0.233852	0.000790769	0.0406401	0.00882593	0.00763297	0.0474101	0.0150396	0.0079511	0	0.915406	265115	0	0
607813	cg13298496	chr17	12570834	-	0.0494797	0.0637561	-0.0142764	-0.310365	0.000793262	0.0862276	0.0213952	0.016523	0.153102	0.0323495	0.0254423	0	0.915406	100151	0	0
27318	cg08783373	chr1	52521810	-	0.0245026	0.0325472	-0.00804454	-0.302357	0.000793438	0.0469399	0.00539018	0.0100535	0.0613018	0.0117036	0.0118988	0	0.915406	194116	0	0
174783	cg00697397	chr4	6561753	-	0.570696	0.514743	0.055953	0.146172	0.000793867	0.728406	0.396759	0.101401	0.705144	0.363021	0.0844037	0	0.915406	51494	0	0
396556	cg18608453	chr10	71443267	+	0.899977	0.85842	0.0415573	0.0674375	0.000794995	0.950723	0.802191	0.0381033	0.94987	0.64368	0.0787103	0	0.915406	135086	0	0
213625	cg07409383	chr5	64071318	-	0.199555	0.249005	-0.0494499	-0.305651	0.00079553	0.417894	0.0351567	0.104069	0.706926	0.0448223	0.121919	0	0.915406	8249	0	0
320404	cg20604634	chr7	148790584	-	0.140844	0.182127	-0.0412826	-0.348999	0.000795679	0.26007	0.0681877	0.0556824	0.467837	0.0684592	0.0750425	0	0.915406	8155	0	0
556217	cg25584422	chr15	69454157	-	0.0251811	0.0345292	-0.00934818	-0.339954	0.000799655	0.0604436	0.00489824	0.0168021	0.114525	0.00833141	0.0222918	0	0.915406	167103	0	0
431708	cg03444245	chr11	45377079	-	0.0382434	0.0296878	0.00855551	0.281633	0.000800564	0.0539351	0.0244227	0.00864575	0.054275	0.0136428	0.00954624	0	0.915406	182719	0	0
649521	cg10858553	chr18	71294188	-	0.530643	0.486706	0.0439367	0.122283	0.000800789	0.722846	0.311952	0.102597	0.673539	0.310459	0.0765891	0	0.915406	67894	0	0
103791	cg23267345	chr2	145275877	+	0.0178585	0.0248009	-0.00694232	-0.321003	0.00080278	0.0307461	0.00345955	0.00788382	0.0673949	0.00280952	0.0130094	0	0.915406	221741	0	0
229181	cg27422420	chr5	140998650	+	0.0242282	0.0321384	-0.00791021	-0.299951	0.000803111	0.0460753	0.00674277	0.00949558	0.061734	0.0113894	0.0121286	0	0.915406	197223	0	0
279240	cg15276254	chr6	147972384	+	0.566315	0.473375	0.0929404	0.253716	0.00080385	0.768951	0.377942	0.103793	0.685839	0.257667	0.110877	0	0.915406	15293	0	0
359246	cg10244293	chr9	2158037	-	0.0309652	0.0363147	-0.00534951	-0.177072	0.000804691	0.0496134	0.0119322	0.0104478	0.0543338	0.0168942	0.00854397	0	0.915406	272961	0	0
50309	cg06573636	chr1	167870100	+	0.96375	0.970061	-0.00631106	-0.00932021	0.000804968	0.976768	0.939801	0.0101549	0.992628	0.94262	0.0116553	0	0.915406	409450	0	0
411508	cg12990750	chr10	123330151	+	0.798832	0.729541	0.0692903	0.129209	0.00080508	0.911559	0.660494	0.0652922	0.886002	0.530598	0.0970887	0	0.915406	62571	0	0
349131	cg21395791	chr8	116632917	+	0.89042	0.863388	0.0270325	0.0439763	0.000806575	0.962657	0.754209	0.0494662	0.943871	0.783375	0.033806	0	0.915406	187538	0	0
400295	cg02599225	chr10	81838473	+	0.0122456	0.0156984	-0.00345275	-0.208155	0.00080818	0.0247544	0.00220237	0.00624987	0.029872	0.00496089	0.00596649	0	0.915406	363010	0	0
657827	cg10169026	chr19	6002617	-	0.894258	0.913679	-0.0194218	-0.0306583	0.000812162	0.917896	0.794307	0.024729	0.959562	0.864009	0.0230293	0	0.915406	233191	0	0
86262	cg21968324	chr2	56412060	-	0.0203224	0.025103	-0.00478059	-0.21121	0.000814827	0.0383157	0.00436137	0.00804528	0.0627168	0.010409	0.0110031	0	0.915406	295847	0	0
95593	cg07953209	chr2	101619020	-	0.0118407	0.0157944	-0.00395379	-0.240044	0.00081708	0.0265246	0.0030798	0.00572348	0.0408903	0.00715256	0.00600072	0	0.915406	334962	0	0
125070	cg00495035	chr2	240269585	+	0.962454	0.951827	0.0106276	0.0158535	0.000818565	0.989611	0.89818	0.021234	0.97996	0.906053	0.0183591	0	0.915406	325975	0	0
177498	cg07656173	chr4	16086023	+	0.126427	0.175008	-0.048581	-0.439458	0.000818977	0.24616	0.0647198	0.0481258	0.433359	0.061579	0.074713	0	0.915406	4239	0	0
61894	cg11398511	chr1	215256635	+	0.023689	0.0298738	-0.00618475	-0.243162	0.000818989	0.0527714	0.00167113	0.0135784	0.105491	0.00198052	0.0185421	0	0.915406	244078	0	0
561875	cg13522359	chr15	84385538	-	0.93185	0.947165	-0.0153149	-0.0232702	0.000820667	0.965113	0.851108	0.0301716	0.98607	0.885633	0.0212038	0	0.915406	270102	0	0
643785	cg15146620	chr18	32733922	+	0.604319	0.669674	-0.0653545	-0.145854	0.000823077	0.767461	0.493747	0.0845206	0.827222	0.362149	0.10165	0	0.915406	51669	0	0
537560	cg24728803	chr14	99742268	+	0.136812	0.155147	-0.0183354	-0.169784	0.000824932	0.313096	0.0131503	0.0846988	0.430706	0.0392333	0.0798083	0	0.915406	68805	0	0
521747	cg23912878	chr14	36789691	+	0.0301772	0.0371091	-0.00693193	-0.22963	0.000825601	0.0485066	0.014	0.00916356	0.0628764	0.0167468	0.0114617	0	0.915406	221998	0	0
276450	cg20387122	chr6	134679535	-	0.192098	0.230934	-0.0388363	-0.253585	0.000825984	0.410709	0.0350487	0.106474	0.629464	0.062874	0.111538	0	0.915406	15318	0	0
431656	cg18110362	chr11	45258014	+	0.841838	0.888784	-0.0469457	-0.0773949	0.000827638	0.937037	0.594961	0.0745518	0.951357	0.78831	0.0388514	0	0.915406	118506	0	0
248313	cg13194994	chr6	26251817	+	0.0169298	0.0196141	-0.00268435	-0.137083	0.000830972	0.0329258	0.00887851	0.00602722	0.0412632	0.00647009	0.00717735	0	0.915406	415563	0	0
643483	cg16967099	chr18	30351472	-	0.0316517	0.039661	-0.00800928	-0.253738	0.000831647	0.0533677	0.0159928	0.00839588	0.0868	0.0195319	0.0123356	0	0.915406	194922	0	0
696899	cg14780681	chr20	44420720	-	0.0177203	0.0220372	-0.00431689	-0.208804	0.000832642	0.0341618	0.00936079	0.00603935	0.0406396	0.00627854	0.00876507	0	0.915406	316807	0	0
702884	cg00859739	chr20	60697463	-	0.0450573	0.0530683	-0.00801095	-0.19598	0.000834749	0.0950027	0.0124409	0.0226221	0.109713	0.0154161	0.0248633	0	0.915406	194885	0	0
578197	cg03713642	chr16	22825100	-	0.0898424	0.122481	-0.0326382	-0.408057	0.00084119	0.193998	0.0544203	0.0314465	0.473087	0.0358603	0.0784876	0	0.915406	18784	0	0
429318	cg11853817	chr11	33397387	-	0.0203023	0.0246911	-0.00438882	-0.195139	0.000841611	0.0416094	0.00435766	0.00896398	0.0516191	0.00853484	0.00956835	0	0.915406	313495	0	0
535398	cg13729548	chr14	93405937	+	0.737197	0.796326	-0.0591285	-0.109874	0.000845134	0.919897	0.406712	0.128214	0.920195	0.457639	0.0979557	0	0.915406	78601	0	0
339283	cg13599734	chr8	55479004	-	0.301191	0.259512	0.0416792	0.207452	0.000847255	0.382719	0.129963	0.0629132	0.38227	0.0970675	0.0728946	0	0.915406	26157	0	0
706504	cg24553619	chr21	30368286	+	0.96681	0.971837	-0.00502703	-0.00740561	0.000847413	0.979055	0.939265	0.0104481	0.990586	0.947658	0.00934959	0	0.915406	447017	0	0
321343	cg05073130	chr7	150715634	+	0.247347	0.199598	0.0477492	0.296091	0.000848673	0.575556	0.0967678	0.105443	0.365769	0.0943271	0.065025	0	0.915406	9256	0	0
713052	cg12352984	chr21	46687249	+	0.950147	0.959094	-0.00894734	-0.0133818	0.000849601	0.968295	0.921545	0.0120066	0.982285	0.924719	0.0129073	0	0.915406	351959	0	0
377691	cg17020310	chr9	135448271	+	0.741622	0.691394	0.0502274	0.099781	0.000850719	0.85743	0.52685	0.080454	0.884269	0.275035	0.101797	0	0.915406	88968	0	0
689750	cg14175979	chr20	21137039	+	0.954527	0.961035	-0.00650831	-0.00970214	0.000851628	0.969996	0.925907	0.0114953	0.982601	0.93816	0.0106775	0	0.915406	402943	0	0
54563	cg10556861	chr1	185286696	+	0.0190493	0.0252252	-0.00617594	-0.278106	0.000852312	0.0368769	0.00814536	0.00789165	0.0440805	0.0057697	0.00845141	0	0.915406	244382	0	0
285124	cg08314980	chr6	168609640	-	0.76921	0.803546	-0.034336	-0.0622118	0.000854905	0.849324	0.668295	0.0510034	0.922625	0.695458	0.0449559	0	0.915406	144906	0	0
200224	cg21832802	chr4	185214840	+	0.0623655	0.0831978	-0.0208323	-0.364994	0.000856428	0.149818	0.0113405	0.0351327	0.316157	0.0202233	0.0514246	0	0.915406	55135	0	0
646273	cg27318546	chr18	48345906	+	0.0128543	0.0159469	-0.00309261	-0.183097	0.000858221	0.026779	0.00457863	0.0062986	0.0279512	0.00516945	0.00583555	0	0.915406	386032	0	0
661012	cg09456971	chr19	11146717	+	0.0108316	0.0137941	-0.00296243	-0.191826	0.000858447	0.0192624	0.00558288	0.00398416	0.0294889	0.00413287	0.00511048	0	0.915406	395088	0	0
70244	cg22067466	chr1	246873298	-	0.0493528	0.0697179	-0.0203651	-0.425587	0.00085926	0.116868	0.00917613	0.0288629	0.181862	0.0109109	0.034789	0	0.915406	57524	0	0
67435	cg19905445	chr1	234743688	-	0.0110112	0.0144051	-0.00339393	-0.216026	0.000859723	0.0213388	0.00486041	0.00434906	0.0445636	0.0052495	0.00817203	0	0.915406	366670	0	0
353248	cg11080206	chr8	133805449	+	0.947591	0.96061	-0.0130194	-0.0194827	0.000859917	0.975894	0.919276	0.0187458	0.981303	0.9277	0.012632	0	0.915406	295292	0	0
555094	cg27573093	chr15	66797591	-	0.0150479	0.021592	-0.00654406	-0.334868	0.000860304	0.036704	0.00382572	0.0074153	0.0426904	0.00392157	0.0104296	0	0.915406	232901	0	0
103497	cg24982424	chr2	143930580	+	0.951795	0.929008	0.0227867	0.0345915	0.000863283	0.997789	0.895764	0.0244146	0.970536	0.80018	0.0357795	0	0.915406	217703	0	0
508681	cg21949157	chr13	76054909	+	0.0449641	0.0618429	-0.0168788	-0.386357	0.000863968	0.0813762	0.0126265	0.0148649	0.104629	0.0145082	0.021964	0	0.915406	78473	0	0
620667	cg22751080	chr17	45726749	+	0.0116082	0.0150609	-0.00345279	-0.213865	0.000865099	0.0247885	3.8847e-05	0.0070504	0.0296032	0.00244461	0.00711591	0	0.915406	363008	0	0
719421	cg23528104	chr22	30752246	+	0.017436	0.0222972	-0.00486113	-0.235335	0.000866461	0.0298026	0.0110585	0.00476007	0.0419435	0.0133329	0.00708723	0	0.915406	292448	0	0
11174	cg21908208	chr1	17865737	-	0.106429	0.0814313	0.0249976	0.348689	0.000868785	0.288747	0.0386171	0.0454277	0.163966	0.0376712	0.0310705	0	0.915406	38059	0	0
242500	cg18658892	chr6	3813718	+	0.0676008	0.0842317	-0.0166309	-0.280141	0.000871845	0.200428	0.0153115	0.0432736	0.282153	0.018292	0.0507859	0	0.915406	80220	0	0
108101	cg23395836	chr2	172094691	+	0.104272	0.13663	-0.0323581	-0.359708	0.000872837	0.263371	0.0248179	0.0639588	0.468164	0.0256277	0.085353	0	0.915406	19307	0	0
252818	cg08913013	chr6	30866849	+	0.957652	0.962017	-0.004365	-0.00649324	0.000874293	0.97459	0.938717	0.00851546	0.986556	0.939411	0.0114459	0	0.915406	468188	0	0
689417	cg03512414	chr20	19915874	-	0.814378	0.780633	0.0337451	0.0602979	0.000876872	0.906732	0.697284	0.053537	0.935825	0.482884	0.0846379	0	0.915406	148799	0	0
656265	cg07602690	chr19	4065213	-	0.00886364	0.0121276	-0.00326394	-0.230238	0.000878525	0.0219303	0.00152421	0.00531324	0.0280076	0.00434783	0.00496357	0	0.915406	374761	0	0
573850	cg12991522	chr16	4986661	+	0.0186726	0.0314759	-0.0128033	-0.532601	0.000879246	0.0571279	0.00587892	0.0113127	0.262867	0.00976275	0.0463741	0	0.915406	115802	0	0
219708	cg11247817	chr5	96294344	-	0.121528	0.159765	-0.038237	-0.36817	0.000879529	0.325809	0.0407544	0.0635569	0.291168	0.0411299	0.0646585	0	0.915406	10937	0	0
99427	cg05111772	chr2	120050013	+	0.784498	0.70029	0.0842078	0.161635	0.000880355	0.968149	0.492853	0.105976	0.916937	0.252299	0.145442	0	0.915406	43289	0	0
61012	cg16674866	chr1	212320951	+	0.659706	0.61451	0.0451966	0.100805	0.000881277	0.748258	0.564629	0.0530903	0.777287	0.30505	0.0947114	0	0.915406	87861	0	0
215215	cg00102033	chr5	72678199	+	0.127174	0.154738	-0.0275633	-0.26416	0.000885074	0.280003	0.0641482	0.0542606	0.35423	0.0693874	0.0668925	0	0.915406	30193	0	0
653656	cg10697737	chr19	1673498	-	0.542694	0.462376	0.0803176	0.226544	0.00088562	0.702789	0.379751	0.0763253	0.631719	0.275143	0.0852776	0	0.915406	21083	0	0
3266	cg17445936	chr1	3090345	-	0.231907	0.179847	0.05206	0.349615	0.000886186	0.411973	0.101194	0.0913913	0.492114	0.0639442	0.0815868	0	0.915406	4851	0	0
159478	cg15303503	chr3	150654689	-	0.71746	0.673561	0.0438994	0.0897986	0.000886217	0.839396	0.567452	0.0741496	0.790371	0.497657	0.0769796	0	0.915406	100962	0	0
599675	cg06706029	chr16	89981752	+	0.894528	0.881037	0.0134916	0.0216808	0.000886977	0.93348	0.840303	0.0240493	0.915777	0.818353	0.0206419	0	0.915406	279841	0	0
580382	cg06946850	chr16	29877776	-	0.734856	0.66183	0.0730267	0.148867	0.000890867	0.879228	0.499631	0.0900449	0.820961	0.471967	0.0845955	0	0.915406	49944	0	0
159443	cg27397116	chr3	150482250	+	0.934939	0.948886	-0.0139471	-0.0211383	0.000891182	0.962488	0.899609	0.0183346	0.979501	0.904295	0.0156497	0	0.915406	283345	0	0
508571	cg17184496	chr13	74864625	+	0.387513	0.31632	0.0711935	0.284717	0.000891871	0.558617	0.249235	0.103636	0.553701	0.0951362	0.116358	0	0.915406	10619	0	0
310915	cg14048874	chr7	101006573	-	0.0116348	0.0174408	-0.00580595	-0.342966	0.000892615	0.0251009	0.00108669	0.00642504	0.0714202	0.00751319	0.0104548	0	0.915406	256607	0	0
363366	cg14317609	chr9	36986006	+	0.0732029	0.0960012	-0.0227983	-0.349375	0.000897728	0.138507	0.0443047	0.0247899	0.198859	0.0346145	0.0395986	0	0.915406	46181	0	0
661445	cg10491532	chr19	11610822	-	0.885644	0.899572	-0.0139274	-0.0222614	0.000899976	0.93688	0.798044	0.0397196	0.95722	0.817127	0.0405194	0	0.915406	276187	0	0
251762	cg20856330	chr6	30313546	-	0.0869952	0.109468	-0.0224729	-0.30064	0.000901548	0.186688	0.0321484	0.0376716	0.262815	0.0368556	0.0479277	0	0.915406	47487	0	0
421336	cg19860704	chr11	2977535	+	0.931764	0.941723	-0.00995943	-0.0151768	0.000901635	0.970829	0.861509	0.0273022	0.981774	0.886606	0.0250963	0	0.915406	332621	0	0
36149	cg05382022	chr1	95698917	+	0.5002	0.41115	0.0890502	0.276729	0.000902197	0.688505	0.297912	0.111728	0.634516	0.166453	0.112954	0	0.915406	11672	0	0
117440	cg15768138	chr2	219030752	+	0.122841	0.170654	-0.0478128	-0.443526	0.000906234	0.293899	0.0318638	0.0719557	0.536021	0.0398503	0.100492	0	0.915406	4544	0	0
490679	cg10811178	chr12	116977945	-	0.616366	0.557015	0.0593508	0.143619	0.000906338	0.80417	0.439409	0.0990521	0.745364	0.295487	0.0979654	0	0.915406	52989	0	0
435455	cg05131646	chr11	61324780	+	0.527371	0.488736	0.0386346	0.107641	0.000906468	0.716264	0.372594	0.0901938	0.728766	0.254547	0.113293	0	0.915406	80735	0	0
104693	cg19508488	chr2	152266495	-	0.00873575	0.0127284	-0.00399269	-0.278705	0.000906641	0.0214133	3.8847e-05	0.00554216	0.021447	0.00289065	0.00554372	0	0.915406	332974	0	0
256531	cg24147543	chr6	32554481	-	0.121988	0.219426	-0.0974374	-0.797616	0.000908387	0.464379	0.00990368	0.152741	0.462461	0.00735802	0.146974	0	0.915406	666	0	0
650002	cg10016752	chr18	73130463	+	0.961974	0.96947	-0.00749602	-0.0110836	0.000908921	0.980955	0.92717	0.0113096	0.983886	0.953847	0.00772374	0	0.915406	381481	0	0
679937	cg20308817	chr19	51225848	-	0.627751	0.59024	0.0375114	0.0874547	0.000908991	0.725046	0.507926	0.0591379	0.792542	0.407386	0.0780139	0	0.915406	104023	0	0
116828	cg09410607	chr2	217237040	+	0.0293682	0.0344933	-0.00512507	-0.176556	0.000909151	0.0533453	0.0124006	0.00961867	0.0540609	0.0177409	0.0100961	0	0.915406	281732	0	0
564190	cg04510874	chr15	91427884	-	0.0850255	0.103212	-0.0181869	-0.252645	0.000909418	0.286327	0.02259	0.0537579	0.334822	0.0358189	0.0636695	0	0.915406	69757	0	0
534554	cg04579263	chr14	91525979	-	0.0663341	0.0726329	-0.00629881	-0.114389	0.000912136	0.17635	0.025394	0.0348212	0.150784	0.0295974	0.0267703	0	0.915406	240383	0	0
638261	cg18879998	chr17	80895949	-	0.961012	0.967535	-0.0065226	-0.00965864	0.000916373	0.97696	0.934661	0.0103784	0.995057	0.924568	0.0135205	0	0.915406	403655	0	0
208019	cg27551597	chr5	29896947	-	0.589304	0.658842	-0.0695378	-0.158377	0.000916995	0.691423	0.446791	0.0693402	0.766589	0.558809	0.0510853	0	0.915406	44963	0	0
419229	cg09566995	chr11	1320634	+	0.0875262	0.119784	-0.032258	-0.412253	0.000918997	0.255463	0.0248442	0.0559486	0.482621	0.0226885	0.080889	0	0.915406	19499	0	0
473569	cg06419663	chr12	52275914	-	0.15064	0.187522	-0.0368818	-0.29818	0.000919615	0.305117	0.0623873	0.0696521	0.523706	0.0638167	0.0913385	0	0.915406	12460	0	0
298385	cg09833279	chr7	36159171	+	0.156223	0.202095	-0.045872	-0.35159	0.000920078	0.416413	0.0374923	0.096526	0.60992	0.0392709	0.110223	0	0.915406	5374	0	0
360234	cg14390656	chr9	11618691	-	0.865009	0.893613	-0.0286034	-0.0464062	0.000921016	0.944644	0.753201	0.0606472	0.96552	0.776204	0.0458687	0	0.915406	180934	0	0
97807	cg04148873	chr2	110963037	+	0.531211	0.433835	0.0973764	0.286169	0.000921387	0.818364	0.296893	0.126252	0.681051	0.181343	0.124586	0	0.915406	10416	0	0
676629	cg17273902	chr19	47104481	-	0.0124851	0.0154015	-0.00291637	-0.175942	0.000923285	0.0273239	0.00277166	0.0066113	0.029092	0.00323498	0.00585639	0	0.915406	398305	0	0
57682	cg20888394	chr1	203247468	-	0.156342	0.193843	-0.0375004	-0.293301	0.00092454	0.34832	0.0703505	0.0728087	0.474397	0.067308	0.0819081	0	0.915406	11716	0	0
423579	cg03204900	chr11	8703958	-	0.0139615	0.0191646	-0.00520309	-0.283499	0.000924885	0.0280046	0.000577034	0.00679421	0.0326886	0.0105102	0.00560228	0	0.915406	278626	0	0
590337	cg08232290	chr16	70983875	+	0.642034	0.61514	0.0268943	0.0607686	0.000926129	0.744969	0.496695	0.0622868	0.725356	0.481806	0.069604	0	0.915406	147846	0	0
453014	cg13318279	chr11	116577961	+	0.590067	0.646131	-0.0560642	-0.128861	0.000926402	0.787435	0.445221	0.0990843	0.940274	0.452917	0.104922	0	0.915406	62857	0	0
221629	cg05457273	chr5	113697649	+	0.0162338	0.0221583	-0.00592451	-0.293765	0.000927696	0.0306455	0.00744523	0.00680147	0.0484593	0.00868201	0.00957278	0	0.915406	252567	0	0
457762	cg07451370	chr11	126848024	-	0.76522	0.826293	-0.061073	-0.109403	0.000928468	0.890657	0.478092	0.106526	0.949341	0.68047	0.0751814	0	0.915406	79070	0	0
220942	cg04450332	chr5	110408780	+	0.0595292	0.0747197	-0.0151904	-0.285077	0.000929088	0.124231	0.0308934	0.0219878	0.157227	0.0415347	0.0268954	0	0.915406	91775	0	0
356434	cg06219408	chr8	143888878	-	0.771805	0.731385	0.0404204	0.0765866	0.000930515	0.84825	0.614387	0.0692331	0.830701	0.393905	0.0829767	0	0.915406	119817	0	0
187256	cg12370284	chr4	88312521	+	0.0185977	0.0221222	-0.0035245	-0.167672	0.000933141	0.0382396	0.00596697	0.00790193	0.0349226	0.00950341	0.00560159	0	0.915406	358681	0	0
428688	cg22369182	chr11	31531406	-	0.0228742	0.0269531	-0.00407896	-0.168742	0.00093615	0.0377962	0.00847712	0.00730858	0.039487	0.0164628	0.00666257	0	0.915406	328532	0	0
361900	cg22022320	chr9	32426874	-	0.946628	0.954846	-0.00821727	-0.0123396	0.000936263	0.974792	0.901348	0.020306	0.973305	0.91913	0.0151877	0	0.915406	364532	0	0
617564	cg11487167	chr17	40318303	+	0.94973	0.956846	-0.0071162	-0.0106578	0.000936386	0.964342	0.928906	0.00980079	0.976005	0.925598	0.0115698	0	0.915406	387864	0	0
315366	cg17200920	chr7	127808798	+	0.0627934	0.0711475	-0.00835408	-0.156739	0.000936792	0.0882353	0.0336085	0.015813	0.114299	0.0432119	0.0197095	0	0.915406	187117	0	0
711959	cg05257483	chr21	45304754	-	0.136573	0.170566	-0.0339929	-0.300907	0.000936846	0.338887	0.0324269	0.0782088	0.524545	0.0394997	0.0908344	0	0.915406	16486	0	0
159126	cg04927429	chr3	149531388	-	0.0214006	0.0270609	-0.00566035	-0.239108	0.000936975	0.0414343	0.00582374	0.00845555	0.0516615	0.00892104	0.0107687	0	0.915406	261623	0	0
249437	cg10372721	chr6	28483092	+	0.920137	0.853398	0.0667388	0.107417	0.00093978	0.965778	0.802035	0.0474022	0.967102	0.602038	0.103218	0	0.915406	80959	0	0
154434	cg19061107	chr3	128693131	+	0.0635521	0.0932216	-0.0296695	-0.488907	0.000940072	0.144523	0.0217367	0.0352994	0.348511	0.0129857	0.0621946	0	0.915406	24907	0	0
345121	cg20333288	chr8	94520572	+	0.949068	0.961978	-0.0129107	-0.0192916	0.000942145	0.977571	0.841868	0.0256938	0.982662	0.931573	0.0124946	0	0.915406	296767	0	0
676951	cg06406719	chr19	47522996	-	0.0186864	0.0247031	-0.00601669	-0.274697	0.000943527	0.0602133	0.0031836	0.0132816	0.0647675	0.00361605	0.014938	0	0.915406	249528	0	0
527960	cg10071662	chr14	66973919	+	0.0630781	0.081242	-0.0181638	-0.320258	0.000944205	0.105049	0.0259896	0.0244184	0.140827	0.0336722	0.0294248	0	0.915406	69924	0	0
620231	cg12604352	chr17	44073915	+	0.854544	0.897776	-0.0432318	-0.0703966	0.000947156	0.938699	0.608687	0.0762791	0.961166	0.746848	0.0508015	0	0.915406	129824	0	0
352836	cg27135715	chr8	131340369	-	0.174189	0.224874	-0.0506852	-0.350701	0.000948486	0.389885	0.0360794	0.093308	0.670625	0.0350898	0.118641	0	0.915406	4799	0	0
424523	cg02992503	chr11	10775409	+	0.974601	0.976954	-0.00235332	-0.0034441	0.00094852	0.988997	0.956198	0.00797316	0.99707	0.960131	0.00818302	0	0.915406	564158	0	0
520409	cg18875371	chr14	29244185	-	0.0818902	0.118701	-0.0368105	-0.486037	0.00094977	0.159033	0.0435472	0.0279945	0.463031	0.0461656	0.0757943	0	0.915406	12552	0	0
21588	cg03753481	chr1	38512595	+	0.0165559	0.0209266	-0.00437071	-0.219816	0.00095022	0.0270943	0.00487721	0.00558271	0.0366412	0.00827682	0.00724146	0	0.915406	314342	0	0
685862	cg15589477	chr20	2672567	-	0.745546	0.703732	0.0418146	0.0821382	0.000950532	0.819432	0.608995	0.0447039	0.804986	0.566969	0.0607944	0	0.915406	111475	0	0
550338	cg04784546	chr15	50646617	+	0.0182946	0.0230907	-0.00479612	-0.2259	0.000952637	0.0297891	0.00431241	0.00709795	0.0366155	0.010111	0.00699409	0	0.915406	295205	0	0
565512	cg12744966	chr15	96715626	-	0.30398	0.225667	0.0783125	0.41392	0.000960253	0.576227	0.0990948	0.0993038	0.428979	0.0282701	0.102734	0	0.915406	2229	0	0
15046	cg07996594	chr1	25257505	-	0.92769	0.936628	-0.00893879	-0.0136878	0.000961958	0.960505	0.876621	0.0207769	0.974238	0.79402	0.0324744	0	0.915406	348488	0	0
351748	cg17857086	chr8	127034119	+	0.604758	0.541108	0.06365	0.157684	0.000963937	0.765215	0.21344	0.137254	0.761112	0.202785	0.138942	0	0.915406	45273	0	0
92097	cg14440297	chr2	83972129	-	0.958289	0.968343	-0.010054	-0.0149027	0.000965196	0.979185	0.912271	0.012911	0.984156	0.938455	0.0105824	0	0.915406	335431	0	0
475451	cg16370398	chr12	54448913	+	0.464816	0.371484	0.0933317	0.315745	0.000967484	0.737838	0.296804	0.113195	0.618576	0.152628	0.115995	0	0.915406	7313	0	0
394436	cg14325169	chr10	60145452	-	0.0128631	0.0150221	-0.00215902	-0.130183	0.000967857	0.0183564	0.00786288	0.00305936	0.0285017	0.00620557	0.00506764	0	0.915406	459266	0	0
406398	cg05364307	chr10	103539189	-	0.11975	0.129519	-0.00976824	-0.104719	0.000968224	0.387614	0.05633	0.0690036	0.256246	0.0566717	0.0530569	0	0.915406	159519	0	0
567844	cg01045337	chr16	374988	+	0.0187835	0.0227857	-0.00400216	-0.187823	0.0009723	0.0362916	0.00876164	0.00577159	0.0341127	0.013698	0.00550983	0	0.915406	332475	0	0
32344	cg10714415	chr1	75594135	+	0.020769	0.0257449	-0.00497591	-0.21626	0.00097361	0.0433227	0.00873267	0.00765966	0.037583	0.0130401	0.00623965	0	0.915406	287707	0	0
477033	cg21764263	chr12	57094642	+	0.112453	0.148025	-0.0355726	-0.367931	0.000975111	0.283805	0.0315468	0.0663594	0.435877	0.0341899	0.0790364	0	0.915406	14138	0	0
273601	cg11045746	chr6	116783807	+	0.229916	0.153561	0.0763547	0.552699	0.000978133	0.715399	0.0513205	0.178136	0.649165	0.0207888	0.153523	0	0.915406	717	0	0
8918	cg13868520	chr1	12139206	+	0.792348	0.759956	0.0323924	0.0594529	0.000979486	0.890755	0.661982	0.0566186	0.880965	0.582924	0.0636959	0	0.915406	150459	0	0
568742	cg01995067	chr16	863240	+	0.719026	0.777489	-0.0584628	-0.111289	0.000979975	0.876332	0.436699	0.10454	0.938384	0.61841	0.0835204	0	0.915406	77256	0	0
1695	cg26609236	chr1	1949354	+	0.898029	0.932784	-0.0347551	-0.0541891	0.000980883	0.955008	0.60904	0.0717185	0.976913	0.848393	0.0295253	0	0.915406	161643	0	0
295681	cg15037137	chr7	27144302	-	0.882853	0.859435	0.0234178	0.0383441	0.000983744	0.947236	0.805696	0.0357696	0.946043	0.736718	0.0443514	0	0.915406	204511	0	0
27445	cg06232635	chr1	53054357	-	0.0547645	0.0746087	-0.0198441	-0.385602	0.00098414	0.117252	0.0129501	0.0294115	0.286696	0.0265317	0.0450677	0	0.915406	60269	0	0
34525	cg06280075	chr1	90058573	+	0.132672	0.16942	-0.0367483	-0.330642	0.000985252	0.313333	0.0357404	0.0796313	0.474689	0.0188482	0.0892488	0	0.915406	12629	0	0
7276	cg15195816	chr1	9719533	-	0.181237	0.227002	-0.0457648	-0.309536	0.000985336	0.325655	0.0772541	0.066068	0.483421	0.103592	0.0789528	0	0.915406	7851	0	0
522375	cg02543556	chr14	39643445	-	0.907266	0.921119	-0.0138533	-0.0216259	0.000987199	0.955162	0.827473	0.0320897	0.967769	0.865913	0.0280868	0	0.915406	280220	0	0
614892	cg07042725	chr17	36505119	-	0.015652	0.0196269	-0.00397485	-0.207833	0.000987517	0.024235	0.00812858	0.00441881	0.0334013	0.008457	0.00521992	0	0.915406	333872	0	0
339161	cg13602461	chr8	55066317	+	0.0593524	0.0752146	-0.0158621	-0.297154	0.000988616	0.142898	0.0240408	0.0340571	0.288822	0.0275623	0.0455731	0	0.915406	86184	0	0
152084	cg09125627	chr3	123033868	+	0.288536	0.23489	0.0536459	0.285771	0.000988684	0.478009	0.158278	0.0929401	0.423242	0.087405	0.0843115	0	0.915406	10473	0	0
568749	cg05479627	chr16	869560	-	0.0112846	0.0158547	-0.00457008	-0.280616	0.000988926	0.0283581	0.000975414	0.00742555	0.0646448	0.00182058	0.0130516	0	0.915406	305136	0	0
293658	cg14973347	chr7	18125731	-	0.112766	0.138242	-0.0254761	-0.272044	0.000989134	0.256637	0.0367956	0.0519338	0.308014	0.052564	0.0521458	0	0.915406	36428	0	0
144028	cg19270089	chr3	62440705	-	0.909315	0.852427	0.0568885	0.0921577	0.000989428	0.958122	0.849044	0.0364957	0.976202	0.606718	0.0825609	0	0.915406	97997	0	0
376758	cg14737553	chr9	133476411	-	0.94822	0.9541	-0.00588027	-0.00882628	0.000990652	0.971036	0.929429	0.0103779	0.968928	0.925889	0.00908365	0	0.915406	418296	0	0
499307	cg01841471	chr13	20879896	-	0.614673	0.556166	0.0585069	0.141876	0.000991081	0.780452	0.326683	0.0945132	0.714151	0.31536	0.087281	0	0.915406	54076	0	0
191174	cg11106508	chr4	119200017	-	0.00722203	0.00888282	-0.00166079	-0.132819	0.000994441	0.016064	0.00180638	0.00403615	0.0211706	0.00153782	0.00452051	0	0.915406	508606	0	0
150154	cg22030770	chr3	113464819	+	0.097039	0.117084	-0.0200452	-0.247648	0.00099757	0.146891	0.0553964	0.0263635	0.232417	0.0505747	0.044028	0	0.915406	59184	0	0
442699	cg24996981	chr11	69919990	+	0.0266851	0.0330417	-0.00635661	-0.230541	0.000999186	0.0498977	0.0147309	0.0094703	0.124081	0.0170219	0.0192664	0	0.915406	238541	0	0
624992	cg14398214	chr17	56493260	-	0.939706	0.953059	-0.0133533	-0.0201436	0.00100176	0.959778	0.874965	0.0160691	0.975903	0.932112	0.0115805	0	0.915406	290411	0	0
138680	cg09515777	chr3	48220798	-	0.981969	0.975853	0.00611593	0.0089224	0.00100212	0.991816	0.962749	0.00716864	0.992891	0.939057	0.0104313	0	0.915406	416507	0	0
680761	cg16580934	chr19	52490310	+	0.0120885	0.0149607	-0.00287219	-0.176362	0.00100317	0.026225	0.000784389	0.00660256	0.0476688	0.00218746	0.00923994	0	0.915406	401569	0	0
689899	cg00569603	chr20	21551068	+	0.55232	0.521554	0.0307659	0.0811748	0.00100345	0.687181	0.453099	0.0662259	0.671955	0.293529	0.0857419	0	0.915406	112877	0	0
494958	cg11442391	chr12	125251900	+	0.441969	0.405805	0.0361647	0.120319	0.00100586	0.628704	0.288466	0.077923	0.512667	0.267493	0.0660266	0	0.915406	69456	0	0
330511	cg11050116	chr8	17780536	-	0.055491	0.0717094	-0.0162184	-0.319206	0.00100686	0.091597	0.0259919	0.0157299	0.164488	0.0364615	0.0222593	0	0.915406	83404	0	0
20278	cg05692130	chr1	35730817	-	0.0942089	0.117072	-0.0228635	-0.286172	0.00100858	0.245647	0.0194502	0.0586297	0.417658	0.0189469	0.0725239	0	0.915406	45928	0	0
719088	cg18228985	chr22	30018031	+	0.172175	0.210451	-0.0382758	-0.275132	0.00100939	0.368295	0.0442174	0.0830324	0.556263	0.0459193	0.0992848	0	0.915406	11889	0	0
343417	cg12239340	chr8	80731130	-	0.101227	0.129122	-0.0278953	-0.322847	0.00101157	0.203671	0.0404969	0.0419071	0.315405	0.054389	0.0522304	0	0.915406	29295	0	0
331738	cg03594078	chr8	22131675	+	0.152238	0.206615	-0.0543778	-0.417027	0.00101172	0.325463	0.0658869	0.0710521	0.567661	0.0326046	0.10298	0	0.915406	2672	0	0
461771	cg01496463	chr12	3392647	-	0.83598	0.808961	0.0270194	0.0468294	0.00101255	0.916342	0.753661	0.0408079	0.885174	0.642405	0.0477189	0	0.915406	179810	0	0
229169	cg16094037	chr5	140995845	-	0.775372	0.72479	0.050582	0.0960442	0.00101331	0.91996	0.610408	0.0771266	0.887297	0.508391	0.0838979	0	0.915406	93265	0	0
566631	cg21838773	chr15	100538145	+	0.47649	0.447129	0.0293609	0.0898086	0.00101455	0.645456	0.306901	0.0836655	0.574311	0.216595	0.0806646	0	0.915406	100950	0	0
354043	cg27046641	chr8	138039659	+	0.456036	0.397102	0.0589336	0.19505	0.00101682	0.662994	0.254043	0.102641	0.725938	0.140798	0.140971	0	0.915406	30008	0	0
722102	cg12897989	chr22	37737288	-	0.898645	0.868127	0.0305175	0.0492863	0.00101697	0.936755	0.8536	0.0260227	0.923486	0.663833	0.0473977	0	0.915406	173409	0	0
101845	cg12411876	chr2	131116574	-	0.985162	0.982205	0.00295663	0.00429263	0.00101765	0.990759	0.976705	0.00400624	0.991746	0.969279	0.0046087	0	0.915406	532941	0	0
273542	cg23357830	chr6	116609276	-	0.969399	0.963192	0.00620673	0.00917186	0.00101785	0.984732	0.951801	0.00865929	0.980643	0.936166	0.0113428	0	0.915406	412092	0	0
265754	cg06386979	chr6	53913342	+	0.875562	0.899087	-0.0235249	-0.0378249	0.00102105	0.908115	0.818454	0.022016	0.942166	0.845763	0.0262666	0	0.915406	206152	0	0
93525	cg17621618	chr2	89267667	+	0.939971	0.949792	-0.00982148	-0.014839	0.00102108	0.955392	0.923263	0.00987193	0.975346	0.9149	0.013308	0	0.915406	336080	0	0
474413	cg05840931	chr12	53401055	-	0.0466362	0.0587347	-0.0120985	-0.279313	0.00102135	0.0786629	0.0178638	0.0170697	0.109853	0.0320329	0.0192542	0	0.915406	124288	0	0
229785	cg19217890	chr5	142246406	-	0.0905768	0.123891	-0.0333146	-0.412766	0.00102147	0.183501	0.0160138	0.0468582	0.369221	0.0206544	0.0575489	0	0.915406	17569	0	0
39640	cg22728606	chr1	113850991	+	0.879564	0.848314	0.0312502	0.0515932	0.00102199	0.955195	0.732865	0.0613289	0.955976	0.561978	0.0711847	0	0.915406	167724	0	0
549281	cg22459814	chr15	45491484	+	0.0152201	0.0185217	-0.00330159	-0.177486	0.00102347	0.029076	0.00524681	0.00567141	0.0333013	0.00542977	0.00639544	0	0.915406	372326	0	0
95947	cg21603144	chr2	102608233	+	0.18175	0.203692	-0.0219421	-0.156307	0.00102355	0.408649	0.0382659	0.0910142	0.409882	0.0662309	0.0845166	0	0.915406	49841	0	0
489569	cg22810181	chr12	113748119	+	0.973036	0.979409	-0.00637296	-0.00932271	0.00102621	0.988681	0.94772	0.0096121	0.997081	0.953521	0.00938759	0	0.915406	409413	0	0
99618	cg27370993	chr2	120518627	+	0.0206914	0.0252217	-0.00453031	-0.198631	0.00102822	0.048968	0.00165396	0.0125872	0.0488222	0.0116663	0.0089622	0	0.915406	306947	0	0
545633	cg19999645	chr15	35047394	+	0.0253425	0.0315484	-0.00620591	-0.233389	0.00103305	0.0512949	0.00582314	0.010489	0.115307	0.0057391	0.0186749	0	0.915406	243388	0	0
728659	cg07837763	chr22	49875144	-	0.850037	0.892779	-0.0427421	-0.0699742	0.00103394	0.963175	0.665416	0.0767792	0.973722	0.751865	0.0591796	0	0.915406	130552	0	0
501049	cg04432341	chr13	27593106	+	0.82333	0.781798	0.0415317	0.073755	0.00103583	0.898461	0.730054	0.0459054	0.870929	0.60044	0.0710218	0	0.915406	124291	0	0
360352	cg06170202	chr9	13450902	-	0.0780464	0.0941926	-0.0161462	-0.242917	0.001036	0.138901	0.0501071	0.0214447	0.138925	0.0610158	0.019915	0	0.915406	83979	0	0
161351	cg17033891	chr3	159852976	-	0.080569	0.101885	-0.021316	-0.304927	0.00103672	0.236258	0.0256672	0.0494744	0.370343	0.0276025	0.0604149	0	0.915406	52720	0	0
333942	cg05274039	chr8	28049823	-	0.871378	0.88717	-0.0157918	-0.0256201	0.00103792	0.909622	0.819315	0.0233425	0.94493	0.826533	0.0281788	0	0.915406	256969	0	0
90874	cg07689503	chr2	74426200	-	0.0256995	0.0308076	-0.00510805	-0.192932	0.00103966	0.0467094	0.0110218	0.00940501	0.0609163	0.0106431	0.0126244	0	0.915406	282417	0	0
40711	cg15485700	chr1	117421329	-	0.0422328	0.05362	-0.0113873	-0.284526	0.00104099	0.104554	0.0063655	0.0252148	0.168817	0.0128023	0.031648	0	0.915406	133940	0	0
459012	cg21176993	chr11	131374259	-	0.108637	0.0847073	0.0239295	0.325004	0.00104566	0.294389	0.0438205	0.0674969	0.219305	0.0292704	0.0418522	0	0.915406	41867	0	0
509294	cg22561487	chr13	79179373	-	0.0970919	0.131515	-0.0344228	-0.402102	0.00104627	0.171858	0.0395599	0.0299793	0.298805	0.0544473	0.0548127	0	0.915406	15797	0	0
679940	cg24790297	chr19	51226357	-	0.437621	0.392943	0.0446786	0.151704	0.00104642	0.586017	0.276582	0.0664714	0.587343	0.19965	0.0817943	0	0.915406	48334	0	0
588294	cg24889777	chr16	67552713	-	0.681947	0.652457	0.0294903	0.0628354	0.00104765	0.830292	0.579777	0.0623337	0.800517	0.531188	0.062272	0	0.915406	143654	0	0
167633	cg01120898	chr3	190231382	+	0.0100009	0.0137285	-0.00372756	-0.246554	0.00104841	0.0199218	0.00323865	0.00358505	0.0342757	0.00338159	0.00551856	0	0.915406	347114	0	0
551472	cg25902187	chr15	55881044	-	0.0338565	0.0410098	-0.0071533	-0.217984	0.0010487	0.0573744	0.00793532	0.0119021	0.0705546	0.0172086	0.0114503	0	0.915406	216049	0	0
42596	cg10059756	chr1	150534021	-	0.00893333	0.0109388	-0.00200542	-0.145247	0.00104949	0.0210981	0.00311924	0.0048596	0.017839	0.00505866	0.00333263	0	0.915406	473689	0	0
225593	cg23194711	chr5	133859471	-	0.926962	0.931581	-0.00461914	-0.00709489	0.00105088	0.94893	0.89233	0.0140948	0.96564	0.896235	0.0162198	0	0.915406	454003	0	0
130782	cg22132982	chr3	13916247	+	0.688556	0.648431	0.0401254	0.0853444	0.0010513	0.827021	0.558041	0.0743155	0.780809	0.461095	0.0772165	0	0.915406	106871	0	0
268803	cg20289299	chr6	86388069	+	0.0390478	0.0492196	-0.0101718	-0.271886	0.00105141	0.0892699	0.0144271	0.0160419	0.101412	0.00352188	0.0219532	0	0.915406	152600	0	0
663637	cg11264635	chr19	15083868	-	0.902275	0.918184	-0.0159095	-0.0249428	0.00105272	0.942041	0.855277	0.0218961	0.963575	0.881649	0.0202693	0	0.915406	260584	0	0
364284	cg03646311	chr9	72873979	-	0.0105875	0.0142343	-0.00364679	-0.235281	0.00105539	0.0258485	0.00185874	0.00584554	0.0243344	0.00245513	0.00570997	0	0.915406	351569	0	0
308616	cg17437939	chr7	97361252	-	0.234054	0.301399	-0.0673456	-0.351567	0.00105676	0.372521	0.0848707	0.0696998	0.691793	0.146754	0.128749	0	0.915406	4741	0	0
192102	cg00148825	chr4	124427195	-	0.0793557	0.0932375	-0.0138818	-0.208336	0.0010586	0.196408	0.0337751	0.0322672	0.181172	0.0397114	0.0348067	0	0.915406	104009	0	0
276798	cg14623715	chr6	136174534	+	0.666313	0.585247	0.0810658	0.184202	0.00106057	0.847152	0.358848	0.1087	0.826851	0.366683	0.110529	0	0.915406	33760	0	0
402141	cg00708678	chr10	91294839	+	0.452871	0.385982	0.0668893	0.225177	0.0010613	0.811707	0.215613	0.161057	0.754063	0.174727	0.127038	0	0.915406	21438	0	0
416311	cg01303723	chr10	134600680	-	0.0189721	0.0213538	-0.00238169	-0.113976	0.00106153	0.0501395	0.00647402	0.00992853	0.0580336	0.0067455	0.0108501	0	0.915406	439805	0	0
317879	cg07664198	chr7	136553882	-	0.110403	0.127884	-0.0174806	-0.195579	0.00106167	0.25214	0.0625799	0.0443873	0.272076	0.0652124	0.0512516	0	0.915406	74312	0	0
387378	cg05347673	chr10	17066154	+	0.0117167	0.0147111	-0.00299444	-0.186356	0.00106179	0.0294394	0.00249556	0.00710792	0.0329019	0.00153499	0.00851409	0	0.915406	392796	0	0
276704	cg00797554	chr6	135627987	+	0.0717002	0.0964301	-0.0247299	-0.381495	0.00106646	0.192535	0.0180531	0.0481219	0.384493	0.0161236	0.0636182	0	0.915406	38994	0	0
441069	cg25866895	chr11	67350326	-	0.486851	0.412028	0.0748235	0.235476	0.00106791	0.756945	0.216391	0.142908	0.634685	0.150322	0.124064	0	0.915406	19029	0	0
365144	cg00598446	chr9	80464087	+	0.197952	0.244292	-0.0463396	-0.290233	0.00106819	0.421201	0.0485968	0.107127	0.649832	0.0778997	0.114828	0	0.915406	9914	0	0
429817	cg00441725	chr11	34641527	+	0.0655913	0.0775445	-0.0119532	-0.211796	0.00106826	0.14247	0.0359524	0.0216477	0.146823	0.0357208	0.0266785	0	0.915406	126192	0	0
168445	cg03765423	chr3	194014481	-	0.637939	0.573168	0.0647704	0.151945	0.00106845	0.872256	0.456872	0.0975521	0.726335	0.346905	0.101811	0	0.915406	48204	0	0
374174	cg06842637	chr9	128508188	-	0.0303194	0.0364331	-0.00611361	-0.203677	0.00106966	0.0678534	0.0105732	0.0150897	0.0923917	0.00869367	0.0161777	0	0.915406	246327	0	0
683088	cg18581616	chr19	56478019	+	0.803016	0.850421	-0.0474056	-0.0817601	0.00107447	0.940896	0.57397	0.0973516	0.964287	0.620776	0.0793216	0	0.915406	112022	0	0
711285	cg25627766	chr21	44312722	+	0.71347	0.661552	0.0519183	0.107435	0.00107482	0.783176	0.616718	0.0467109	0.784731	0.408811	0.0785794	0	0.915406	80942	0	0
237594	cg21145980	chr5	175000987	-	0.548433	0.504684	0.0437495	0.117699	0.00107666	0.763762	0.362746	0.113066	0.766716	0.353202	0.0962962	0	0.915406	71571	0	0
149556	cg18263988	chr3	111582491	-	0.963703	0.973413	-0.00970986	-0.0143154	0.00107675	0.987348	0.937482	0.0130728	0.993601	0.952956	0.00949758	0	0.915406	341449	0	0
392990	cg06840491	chr10	48416966	-	0.835156	0.787225	0.0479312	0.0842311	0.00107686	0.925693	0.590937	0.0750198	0.956102	0.618402	0.0720381	0	0.915406	108455	0	0
332453	cg25300094	chr8	23282956	-	0.868265	0.832561	0.0357034	0.0598742	0.00107693	0.917394	0.800961	0.0347236	0.933631	0.623952	0.0625537	0	0.915406	149665	0	0
273593	cg18397770	chr6	116772693	+	0.0310528	0.0385888	-0.00753602	-0.243144	0.00107751	0.0750365	0.0121677	0.0145895	0.0789799	0.0093258	0.0158836	0	0.915406	206170	0	0
237311	cg26801278	chr5	173738161	-	0.589958	0.55729	0.0326682	0.0807755	0.00107853	0.730996	0.453882	0.0869569	0.701929	0.384239	0.0862446	0	0.915406	113497	0	0
705388	cg24761606	chr21	16429811	-	0.159253	0.193223	-0.0339697	-0.263879	0.00107913	0.356255	0.0755637	0.0672224	0.429718	0.0646534	0.08494	0	0.915406	16524	0	0
88946	cg06757796	chr2	69309365	+	0.947931	0.956265	-0.00833401	-0.0124972	0.00107942	0.968682	0.925396	0.0119052	0.974893	0.92985	0.0109672	0	0.915406	362548	0	0
388765	cg21629546	chr10	24499162	+	0.0239233	0.0299667	-0.00604337	-0.236521	0.00108068	0.0558077	0.00367152	0.0135716	0.0689813	0.00503589	0.0148587	0	0.915406	248596	0	0
81807	cg07579311	chr2	37850131	-	0.934653	0.951876	-0.0172236	-0.0260673	0.00108291	0.973054	0.876199	0.0257198	0.989911	0.92837	0.015296	0	0.915406	254613	0	0
413787	cg20407834	chr10	129797019	-	0.860736	0.908403	-0.0476671	-0.0768922	0.00108315	0.982035	0.692929	0.0746134	0.963207	0.78977	0.04756	0	0.915406	119292	0	0
697649	cg26046136	chr20	45526613	+	0.745797	0.699366	0.0464318	0.0914702	0.00108322	0.865403	0.632868	0.0675458	0.8167	0.572304	0.0668843	0	0.915406	98874	0	0
117977	cg19887502	chr2	219761853	-	0.0242414	0.0329916	-0.0087502	-0.328313	0.00108432	0.0625291	0.00299614	0.0125289	0.0658435	0.00787141	0.0154129	0	0.915406	178674	0	0
319676	cg14141514	chr7	142829066	+	0.759362	0.702991	0.0563715	0.10978	0.00108445	0.875837	0.604578	0.0828524	0.845647	0.366382	0.107773	0	0.915406	78700	0	0
667531	cg09777776	chr19	24269890	-	0.0282082	0.0366022	-0.00839398	-0.286515	0.001086	0.0555963	0.0101539	0.00897127	0.128292	0.0173239	0.0198681	0	0.915406	186224	0	0
317781	cg01119571	chr7	135541567	+	0.926636	0.938978	-0.0123422	-0.0188865	0.00108623	0.972469	0.857423	0.0256616	0.969619	0.889471	0.0231845	0	0.915406	299857	0	0
419622	cg04552555	chr11	1680823	-	0.0510831	0.0653792	-0.0142961	-0.303393	0.00108645	0.163139	0.00790177	0.0352168	0.206724	0.015096	0.0362844	0	0.915406	99954	0	0
611487	cg11881146	chr17	26880729	+	0.925463	0.907804	0.0176591	0.0274946	0.00108795	0.963821	0.826396	0.0328419	0.966819	0.814552	0.0364729	0	0.915406	247504	0	0
182578	cg02883198	chr4	55543682	-	0.912732	0.888356	0.0243759	0.0386242	0.00108971	0.95951	0.823326	0.0341222	0.959341	0.738576	0.0481431	0	0.915406	203591	0	0
400420	cg13087076	chr10	82116405	+	0.0347326	0.0398754	-0.00514279	-0.157001	0.00109112	0.0611492	0.0208698	0.0110918	0.0768616	0.0217639	0.0115816	0	0.915406	281013	0	0
723665	cg01315054	chr22	39869399	-	0.873534	0.89031	-0.016776	-0.0271362	0.00109526	0.939033	0.766173	0.0338129	0.942746	0.81556	0.0296585	0	0.915406	249290	0	0
378225	cg04623799	chr9	136390157	+	0.9535	0.961236	-0.00773594	-0.0115371	0.00109559	0.966499	0.936499	0.00859487	0.97941	0.920648	0.0123745	0	0.915406	375159	0	0
648772	cg23794586	chr18	61515092	+	0.790272	0.752616	0.0376564	0.0695344	0.00109664	0.849637	0.69428	0.0448784	0.85061	0.441979	0.0688491	0	0.915406	131353	0	0
395101	cg16664253	chr10	63573156	+	0.895815	0.911129	-0.0153136	-0.0241862	0.00109821	0.933892	0.838704	0.0235319	0.951063	0.879667	0.0168326	0	0.915406	264785	0	0
299765	cg12600182	chr7	42974203	+	0.901517	0.914273	-0.0127558	-0.0200492	0.00109834	0.94654	0.801774	0.0356364	0.954436	0.820599	0.0286417	0	0.915406	291076	0	0
516825	cg07244095	chr13	114833435	+	0.0145744	0.0188138	-0.00423941	-0.229605	0.0011001	0.0470129	0.00206307	0.0093485	0.0445803	0.00490421	0.00966639	0	0.915406	320471	0	0
175444	cg21540588	chr4	7462468	+	0.850268	0.791024	0.0592438	0.10294	0.00110019	0.942435	0.702882	0.0635657	0.919202	0.531896	0.100013	0	0.915406	85573	0	0
711644	cg17806069	chr21	44863611	+	0.924229	0.937221	-0.0129918	-0.0199246	0.00110043	0.95001	0.880281	0.016961	0.966171	0.91354	0.0127924	0	0.915406	291979	0	0
103021	cg22208943	chr2	137082879	+	0.125852	0.155735	-0.0298832	-0.286845	0.00110063	0.282549	0.0269799	0.0745013	0.541171	0.041409	0.0872563	0	0.915406	24416	0	0
585923	cg01970638	chr16	57520503	+	0.0167738	0.019753	-0.00297926	-0.152216	0.00110363	0.0361661	0.00260514	0.00798199	0.0501728	0.00329934	0.00929278	0	0.915406	393896	0	0
298711	cg21086690	chr7	37351266	+	0.865275	0.878944	-0.0136688	-0.0223559	0.00110466	0.919837	0.768867	0.0363862	0.945849	0.693776	0.0456377	0	0.915406	275598	0	0
612966	cg07988060	chr17	30234789	-	0.0749803	0.0895262	-0.0145459	-0.227948	0.0011051	0.159485	0.0341216	0.0284166	0.151282	0.0310669	0.0276679	0	0.915406	97516	0	0
28004	cg14372524	chr1	54163860	+	0.678127	0.609739	0.0683881	0.151014	0.00110845	0.834886	0.314761	0.10124	0.769773	0.236155	0.108919	0	0.915406	48724	0	0
162138	cg06238409	chr3	168864101	-	0.0091102	0.0115899	-0.00247974	-0.176016	0.00111021	0.0194507	0.00323666	0.00459141	0.0228435	0.00496795	0.00507492	0	0.915406	431771	0	0
515611	cg10675568	chr13	113597492	-	0.00600641	0.00751385	-0.00150744	-0.129847	0.00111258	0.0144964	0.00190606	0.00331804	0.0140121	0.00221821	0.00300789	0	0.915406	525503	0	0
709797	cg24341911	chr21	40689521	+	0.0897711	0.117324	-0.0275529	-0.35181	0.00111274	0.198612	0.0253139	0.0456053	0.353855	0.0309044	0.0631552	0	0.915406	30225	0	0
593709	cg08856946	chr16	82661421	+	0.0479957	0.0558804	-0.00788465	-0.183902	0.00111411	0.084096	0.0224677	0.0158223	0.111058	0.0286668	0.0219381	0	0.915406	197812	0	0
206971	cg23125993	chr5	15426122	+	0.489951	0.409342	0.080609	0.253659	0.00111506	0.690178	0.267491	0.0990183	0.91994	0.203523	0.139722	0	0.915406	15305	0	0
271233	cg06367607	chr6	106603209	-	0.942047	0.950199	-0.00815197	-0.0123006	0.00111647	0.966962	0.886511	0.0211453	0.975523	0.909752	0.0159985	0	0.915406	365018	0	0
492303	cg22713360	chr12	121125837	-	0.105428	0.122848	-0.0174193	-0.202776	0.00111663	0.181387	0.0435501	0.0343907	0.223428	0.051402	0.0447664	0	0.915406	74728	0	0
362071	cg14440947	chr9	33166737	-	0.0171926	0.0210816	-0.00388899	-0.192846	0.00112341	0.0327999	0.00637567	0.00604553	0.0320261	0.00918717	0.0051613	0	0.915406	338380	0	0
640211	cg17338269	chr18	9114772	-	0.84579	0.807888	0.0379021	0.0653537	0.00112454	0.886734	0.750516	0.0370714	0.890331	0.630655	0.0580674	0	0.915406	138926	0	0
513155	cg12862112	chr13	109248412	-	0.541689	0.637255	-0.0955656	-0.230478	0.0011255	0.895275	0.214772	0.143051	0.896871	0.379687	0.124107	0	0.915406	20134	0	0
517984	cg21876626	chr14	22005045	-	0.135565	0.171695	-0.0361301	-0.319855	0.00112654	0.285243	0.0781592	0.044617	0.364115	0.0670927	0.0647656	0	0.915406	13392	0	0
104539	cg21436828	chr2	151351283	-	0.704013	0.670755	0.0332588	0.0688162	0.00112714	0.810274	0.609078	0.0556588	0.794019	0.465777	0.0716837	0	0.915406	132608	0	0
112835	cg07065759	chr2	198017462	+	0.0773473	0.0918184	-0.0144712	-0.221164	0.00112731	0.243093	0.00741303	0.0564765	0.30237	0.0207719	0.0506228	0	0.915406	98261	0	0
411550	cg09772154	chr10	123358284	+	0.022603	0.0294128	-0.00680977	-0.273658	0.00112757	0.0551741	0.00757368	0.0110881	0.094702	0.00603202	0.0151391	0	0.915406	225367	0	0
349489	cg25533854	chr8	118532856	-	0.0233412	0.0316198	-0.00827858	-0.319963	0.00112764	0.0344725	0.0125551	0.00703098	0.0655032	0.00736037	0.0112861	0	0.915406	188823	0	0
263997	cg01946401	chr6	45296101	+	0.363183	0.292556	0.0706275	0.302683	0.00112885	0.681422	0.176782	0.138741	0.775504	0.0885787	0.135035	0	0.915406	8558	0	0
530524	cg14966496	chr14	74227098	-	0.0168474	0.0207061	-0.00385873	-0.193744	0.00112952	0.0293402	0.00657507	0.00652021	0.0371136	0.00536304	0.00658716	0	0.915406	339967	0	0
346456	cg18505241	chr8	99955018	+	0.0811944	0.102973	-0.0217788	-0.308963	0.00113069	0.206899	0.0376501	0.03564	0.242586	0.0485293	0.0384614	0	0.915406	50568	0	0
297399	cg26917745	chr7	30939723	-	0.587703	0.557896	0.0298074	0.073803	0.00113137	0.706704	0.423552	0.0666311	0.706599	0.412782	0.0664021	0	0.915406	124205	0	0
625586	cg19354039	chr17	58217571	-	0.492615	0.559295	-0.0666795	-0.179721	0.00113143	0.702908	0.371528	0.0922226	0.863246	0.385989	0.107084	0	0.915406	35440	0	0
699669	cg01529637	chr20	50721911	+	0.0332551	0.040591	-0.00733592	-0.226011	0.00113171	0.0658899	0.0142261	0.0122231	0.0937363	0.0165959	0.017204	0	0.915406	211250	0	0
663986	cg12224165	chr19	15560314	-	0.0299391	0.0349876	-0.00504849	-0.171725	0.00113265	0.0518712	0.00292683	0.0128328	0.0571114	0.00995887	0.0101882	0	0.915406	284852	0	0
294011	cg15031075	chr7	20335474	-	0.693558	0.73072	-0.0371622	-0.0742594	0.00113339	0.797026	0.598763	0.0530538	0.827741	0.64203	0.052408	0	0.915406	123517	0	0
133520	cg01486965	chr3	30176694	-	0.928052	0.938049	-0.00999715	-0.015294	0.00113391	0.962902	0.874884	0.0200275	0.972289	0.879766	0.0249194	0	0.915406	331469	0	0
95380	cg05807690	chr2	101034283	+	0.0584079	0.0718003	-0.0133924	-0.257942	0.0011342	0.123448	0.0158638	0.0264393	0.119986	0.0268611	0.024095	0	0.915406	109313	0	0
87840	cg26586003	chr2	64991312	-	0.971365	0.977324	-0.00595824	-0.00873267	0.00113453	0.98518	0.94462	0.0105144	0.9976	0.954514	0.00895453	0	0.915406	420029	0	0
564001	cg16048647	chr15	91107436	-	0.0357049	0.0410298	-0.00532497	-0.158993	0.00113493	0.154345	0.0100823	0.028678	0.112127	0.00746525	0.0232217	0	0.915406	273872	0	0
279126	cg20794541	chr6	147200317	-	0.114905	0.152468	-0.0375628	-0.379321	0.00113588	0.269209	0.0325783	0.0686093	0.497409	0.0356772	0.0916158	0	0.915406	11647	0	0
314809	cg20923990	chr7	123671355	+	0.73208	0.652539	0.0795408	0.163569	0.00113708	0.935369	0.575589	0.0874719	0.847918	0.224433	0.149881	0	0.915406	42355	0	0
464254	cg03749201	chr12	8115842	+	0.117139	0.138818	-0.021679	-0.227143	0.00113815	0.311919	0.0349945	0.0675148	0.433231	0.0348183	0.0785266	0	0.915406	51009	0	0
360792	cg07383171	chr9	16625585	+	0.828172	0.785297	0.0428745	0.0757518	0.00113818	0.910051	0.741921	0.0441658	0.872432	0.696577	0.0533351	0	0.915406	121127	0	0
642962	cg21609875	chr18	25544875	+	0.597186	0.5678	0.0293865	0.0715695	0.00113893	0.740988	0.409031	0.0972605	0.71258	0.405393	0.078685	0	0.915406	127813	0	0
641333	cg12786697	chr18	13052229	+	0.0574158	0.0828587	-0.0254429	-0.46195	0.00114065	0.122144	0.0273391	0.0267354	0.273988	0.0202701	0.0483121	0	0.915406	36562	0	0
728418	cg26368826	chr22	49151908	-	0.72434	0.704562	0.0197772	0.0393874	0.00114085	0.845866	0.528476	0.0782342	0.820546	0.467131	0.0756709	0	0.915406	201220	0	0
345528	cg03822181	chr8	95909409	+	0.036839	0.0467283	-0.00988933	-0.276359	0.00114175	0.0906851	0.00765504	0.022276	0.105672	0.00946764	0.0224658	0	0.915406	157348	0	0
601390	cg05903609	chr17	1587888	+	0.087096	0.0784113	0.00868469	0.135181	0.00114363	0.13083	0.0574206	0.021262	0.118839	0.0359183	0.0196294	0	0.915406	180080	0	0
685983	cg13302369	chr20	2821941	-	0.0547901	0.0723007	-0.0175106	-0.345131	0.00114404	0.109455	0.0194108	0.0231459	0.123906	0.0453084	0.0218446	0	0.915406	74096	0	0
462133	cg11416012	chr12	4380899	-	0.0932981	0.117003	-0.0237047	-0.298047	0.00114571	0.232552	0.0472441	0.0416491	0.320264	0.0350327	0.0526561	0	0.915406	42651	0	0
425354	cg09550842	chr11	13156713	+	0.839052	0.813925	0.0251267	0.0433394	0.00114769	0.908637	0.728077	0.0431582	0.884964	0.671578	0.0472771	0	0.915406	189339	0	0
347149	cg14265650	chr8	102217569	+	0.0102453	0.015565	-0.00531975	-0.336586	0.00115048	0.0225446	3.8847e-05	0.00555849	0.0292506	0.00142762	0.00594892	0	0.915406	274056	0	0
134509	cg05518088	chr3	34463554	+	0.613287	0.545816	0.0674704	0.165288	0.00115211	0.881959	0.29806	0.139237	0.804183	0.240595	0.119877	0	0.915406	41490	0	0
10394	cg15939373	chr1	16344342	-	0.774567	0.745834	0.028733	0.0538272	0.0011526	0.856649	0.669607	0.0496939	0.853605	0.608001	0.0646133	0	0.915406	162456	0	0
518611	cg14876923	chr14	23339869	+	0.88812	0.898537	-0.0104172	-0.0166374	0.00115284	0.923923	0.837526	0.0262306	0.962992	0.815088	0.032361	0	0.915406	318663	0	0
537047	cg18649451	chr14	97081208	+	0.765483	0.833119	-0.0676353	-0.12064	0.00115334	0.879253	0.525189	0.0858719	0.958045	0.680825	0.0821098	0	0.915406	69194	0	0
142834	cg05840900	chr3	56972832	-	0.919676	0.937294	-0.0176181	-0.0270845	0.00115404	0.953157	0.814083	0.028443	0.968957	0.887258	0.016889	0	0.915406	249546	0	0
53940	cg12552165	chr1	183154981	-	0.611917	0.57482	0.0370973	0.0887302	0.00115601	0.76444	0.492786	0.0693774	0.739969	0.379649	0.0817104	0	0.915406	102393	0	0
720008	cg01606027	chr22	31607212	-	0.0930356	0.124901	-0.0318653	-0.388757	0.00115856	0.231813	0.0150478	0.058944	0.424359	0.013914	0.0788336	0	0.915406	20297	0	0
197746	cg00901765	chr4	168155510	+	0.0213212	0.0260054	-0.00468418	-0.201073	0.00115903	0.0487641	0.00896243	0.00830314	0.0554508	0.0139702	0.00949583	0	0.915406	300069	0	0
464621	cg18278340	chr12	9399127	+	0.974604	0.979401	-0.00479773	-0.00701282	0.00116102	0.988249	0.942329	0.0106848	0.993887	0.938771	0.011021	0	0.915406	455883	0	0
132915	cg15809488	chr3	25470113	+	0.0781968	0.0932241	-0.0150273	-0.226981	0.00116208	0.184781	0.0537465	0.0297672	0.16036	0.0495249	0.0267383	0	0.915406	93194	0	0
53290	cg11649969	chr1	180940378	+	0.936693	0.947236	-0.0105432	-0.0159784	0.0011633	0.978466	0.875164	0.0268259	0.977043	0.897289	0.0202139	0	0.915406	324788	0	0
508727	cg21784919	chr13	76123471	+	0.00856834	0.010588	-0.00201966	-0.148959	0.00116368	0.0168648	0.00264297	0.00332135	0.0181283	0.00226022	0.00372087	0	0.915406	472289	0	0
662702	cg11158440	chr19	13261480	-	0.00744633	0.0096214	-0.00217508	-0.169505	0.00116567	0.0139303	0.00184141	0.00398058	0.022085	0.00143151	0.00418755	0	0.915406	457752	0	0
388847	cg13572780	chr10	24792697	-	0.0421836	0.067563	-0.0253794	-0.571772	0.00116626	0.0772424	0.0134317	0.0186578	0.187673	0.0248168	0.0387192	0	0.915406	36768	0	0
395552	cg26415370	chr10	65226379	-	0.161615	0.201666	-0.040051	-0.302614	0.00116703	0.343292	0.067117	0.0729913	0.481768	0.047602	0.0872906	0	0.915406	9148	0	0
71708	cg14108581	chr2	1426094	-	0.893594	0.91028	-0.0166858	-0.0263979	0.00116717	0.933753	0.750322	0.0437623	0.949685	0.859352	0.0228664	0	0.915406	252924	0	0
176281	cg13073564	chr4	8508604	-	0.913184	0.891997	0.0211874	0.0334963	0.00116736	0.967973	0.832866	0.0300575	0.957766	0.737154	0.045475	0	0.915406	221641	0	0
323477	cg12620706	chr7	155917159	+	0.744792	0.771966	-0.0271746	-0.051028	0.00116772	0.825624	0.60294	0.0595945	0.866407	0.639178	0.0571456	0	0.915406	169137	0	0
48568	cg15026376	chr1	161238112	-	0.552657	0.532123	0.0205343	0.0536363	0.00116832	0.713504	0.421678	0.0687569	0.674434	0.415556	0.0634739	0	0.915406	162890	0	0
309839	cg14401395	chr7	99753627	-	0.912234	0.920872	-0.00863792	-0.0134498	0.00117124	0.951216	0.840769	0.0280265	0.972666	0.837516	0.0308924	0	0.915406	351192	0	0
219404	cg01705611	chr5	95417119	-	0.07389	0.0919964	-0.0181065	-0.281949	0.00117141	0.21957	0.0218234	0.0435625	0.303242	0.0226451	0.0513463	0	0.915406	70244	0	0
222861	cg15027262	chr5	122180440	-	0.0416449	0.0513123	-0.00966732	-0.247549	0.00117187	0.0877416	0.0117898	0.0207452	0.202859	0.0194622	0.0314397	0	0.915406	161254	0	0
135042	cg20885179	chr3	38035831	-	0.00806362	0.0119028	-0.00383916	-0.278027	0.00117244	0.0236754	0.00100946	0.00578764	0.0243936	0.00190209	0.00493862	0	0.915406	341017	0	0
346394	cg18548520	chr8	99781007	-	0.121814	0.156164	-0.0343504	-0.334109	0.00117246	0.29059	0.0123671	0.0757038	0.530584	0.0278419	0.091493	0	0.915406	15917	0	0
354701	cg10722846	chr8	141468634	+	0.0196717	0.0251182	-0.00544644	-0.243129	0.00117739	0.0360656	0.00475276	0.00802032	0.0400317	0.00951918	0.00650846	0	0.915406	269363	0	0
124768	cg20854286	chr2	240019466	-	0.918882	0.936882	-0.0180004	-0.0276899	0.00117759	0.958938	0.886742	0.019484	0.95892	0.91067	0.0132069	0	0.915406	246584	0	0
554080	cg24354072	chr15	64679333	+	0.844465	0.811947	0.0325184	0.0559767	0.00117803	0.975138	0.675809	0.0791083	0.960558	0.623517	0.0736942	0	0.915406	157794	0	0
661602	cg09241324	chr19	11847798	-	0.0569288	0.0710433	-0.0141145	-0.276066	0.0011781	0.122087	0.0130424	0.0263546	0.148575	0.0303145	0.0241205	0	0.915406	101716	0	0
646064	cg20012977	chr18	47688392	+	0.853576	0.909611	-0.056035	-0.0907005	0.00117857	0.951302	0.62578	0.0902634	0.955581	0.748947	0.0398702	0	0.915406	99846	0	0
456336	cg15357075	chr11	123325095	-	0.0131216	0.020068	-0.00694642	-0.378989	0.00117965	0.0406306	0.000252757	0.0107215	0.0523442	0.00236497	0.011774	0	0.915406	221633	0	0
646033	cg17516716	chr18	47434399	+	0.593456	0.539936	0.0535196	0.133984	0.00117977	0.789776	0.405343	0.110434	0.717128	0.177589	0.113396	0	0.915406	59198	0	0
706666	cg08094347	chr21	30699368	+	0.964653	0.96978	-0.00512765	-0.00757012	0.00117997	0.988403	0.929831	0.0168005	0.989758	0.935337	0.014069	0	0.915406	443495	0	0
148418	cg17445840	chr3	101546486	-	0.00726278	0.00825265	-0.000989872	-0.0804413	0.00118067	0.0217285	0.00036831	0.00600541	0.0181775	0.000535002	0.00497857	0	0.915406	588158	0	0
136055	cg26463342	chr3	41935976	-	0.932077	0.944772	-0.0126951	-0.0193115	0.00118068	0.965462	0.817178	0.0268692	0.973987	0.905152	0.0125147	0	0.915406	296605	0	0
117208	cg21571548	chr2	218458474	-	0.71708	0.68159	0.0354903	0.0721978	0.0011823	0.83965	0.585422	0.0676545	0.828404	0.476268	0.0771978	0	0.915406	126767	0	0
86690	cg13500074	chr2	60780746	-	0.0207458	0.0267467	-0.00600087	-0.257224	0.00118478	0.0409923	0.00400758	0.00981581	0.0547081	0.00858551	0.0128533	0	0.915406	250024	0	0
78623	cg01053551	chr2	26367161	-	0.200416	0.238597	-0.038181	-0.240565	0.00118544	0.462542	0.0625881	0.0970777	0.611456	0.0503374	0.10701	0	0.915406	17967	0	0
106293	cg12528330	chr2	162029209	-	0.974139	0.980744	-0.00660522	-0.00965055	0.0011879	0.988294	0.960864	0.00744966	0.991583	0.970161	0.00568093	0	0.915406	403773	0	0
29742	cg13974615	chr1	60209701	+	0.18864	0.242445	-0.0538052	-0.345814	0.00119247	0.381945	0.0827158	0.0830253	0.652246	0.0821425	0.107205	0	0.915406	5062	0	0
496784	cg13381015	chr12	131517024	+	0.703023	0.646074	0.0569495	0.120091	0.00119352	0.85795	0.493263	0.0845283	0.852748	0.382302	0.102482	0	0.915406	69645	0	0
237475	cg06916315	chr5	174178587	-	0.0141351	0.0164296	-0.00229446	-0.131019	0.00119522	0.0254106	0.00374177	0.00551524	0.0293032	0.00537323	0.00511814	0	0.915406	447263	0	0
25887	cg19997281	chr1	47060948	-	0.0395302	0.0489972	-0.00946703	-0.252339	0.0011976	0.127162	0.00911041	0.0262541	0.191837	0.0136459	0.0312698	0	0.915406	164911	0	0
392589	cg18382353	chr10	45495981	-	0.130933	0.162157	-0.0312234	-0.28871	0.00119784	0.309618	0.0227421	0.0660496	0.483114	0.03865	0.0832895	0	0.915406	21563	0	0
186881	cg26298470	chr4	86396765	-	0.0274232	0.032958	-0.00553475	-0.198992	0.00120031	0.0497226	0.0121475	0.0107646	0.0600851	0.017444	0.0101476	0	0.915406	266115	0	0
213586	cg17505819	chr5	63900077	+	0.798046	0.763991	0.0340551	0.0621209	0.00120054	0.899356	0.595702	0.0673104	0.866355	0.638307	0.0630069	0	0.915406	145066	0	0
339784	cg06250841	chr8	58138048	+	0.960252	0.951128	0.00912318	0.0136297	0.00120214	0.986173	0.939027	0.0122536	0.977821	0.897828	0.0179258	0	0.915406	349138	0	0
505358	cg18862963	chr13	45923711	-	0.161118	0.195518	-0.0343991	-0.264267	0.00120333	0.343349	0.0386707	0.0909804	0.553208	0.0624365	0.0978204	0	0.915406	15845	0	0
90398	cg17329648	chr2	73297389	+	0.104786	0.140297	-0.0355105	-0.388863	0.00120476	0.274853	0.0341012	0.0626626	0.479096	0.04606	0.0773551	0	0.915406	14227	0	0
233074	cg10270698	chr5	154239111	-	0.0119779	0.0164577	-0.00447979	-0.267633	0.00120491	0.0238608	0.00406432	0.00501079	0.0369874	0.0038971	0.00731581	0	0.915406	309245	0	0
646587	cg03418842	chr18	51883437	+	0.773717	0.732679	0.0410384	0.0775947	0.00120579	0.851359	0.635474	0.0594535	0.83767	0.564126	0.067187	0	0.915406	118206	0	0
405596	cg06514784	chr10	102422119	+	0.563894	0.624906	-0.0610114	-0.145757	0.00120582	0.714539	0.286251	0.111728	0.772148	0.493584	0.072844	0	0.915406	51728	0	0
240236	cg09663237	chr5	179660783	-	0.992913	0.990817	0.00209644	0.0030189	0.00120666	0.997573	0.98408	0.00335937	0.996741	0.983462	0.00285969	0	0.915406	581625	0	0
383616	cg26434068	chr10	3762778	+	0.129947	0.168096	-0.0381485	-0.34777	0.0012083	0.34924	0.0170218	0.0825766	0.545685	0.0262717	0.0947609	0	0.915406	11027	0	0
643644	cg26146542	chr18	32073016	+	0.0220169	0.0250675	-0.00305062	-0.131302	0.00120839	0.034496	0.0102502	0.00687881	0.0362856	0.0126139	0.00685502	0	0.915406	388874	0	0
49193	cg07521829	chr1	163292240	-	0.011966	0.0152191	-0.00325308	-0.199244	0.0012091	0.0262789	1.13563e-05	0.00832607	0.0392449	0.00228938	0.00866567	0	0.915406	375458	0	0
474222	cg14206510	chr12	53108015	-	0.0309073	0.0351499	-0.00424254	-0.142363	0.00121026	0.0540788	0.00704913	0.011262	0.0542577	0.0195791	0.00869007	0	0.915406	320335	0	0
48561	cg27223727	chr1	161228496	-	0.0169084	0.0190663	-0.00215791	-0.111291	0.0012111	0.0364372	0.00623337	0.00768025	0.0356424	0.00638733	0.00679133	0	0.915406	459364	0	0
354151	cg02519627	chr8	139748151	-	0.794565	0.744608	0.0499577	0.092483	0.00121199	0.935006	0.637268	0.0766367	0.920022	0.550481	0.0968053	0	0.915406	97591	0	0
395737	cg09455274	chr10	68685487	+	0.512915	0.441681	0.0712336	0.211271	0.00121357	0.766095	0.248933	0.12673	0.667675	0.172672	0.110746	0	0.915406	25061	0	0
136053	cg05994652	chr3	41896526	-	0.916229	0.929336	-0.0131077	-0.0202735	0.00121381	0.955858	0.873406	0.0199108	0.960711	0.895171	0.0162873	0	0.915406	289454	0	0
143411	cg21433121	chr3	58477944	-	0.0153657	0.0200438	-0.0046781	-0.244189	0.00121432	0.0297897	0.00333787	0.00610316	0.0293317	0.00694734	0.00665644	0	0.915406	300323	0	0
95865	cg17122582	chr2	102380604	+	0.201689	0.246172	-0.0444828	-0.275165	0.00121473	0.398914	0.0429457	0.0920562	0.641664	0.059311	0.114785	0	0.915406	11885	0	0
151438	cg22955676	chr3	121264844	+	0.0155068	0.019765	-0.00425818	-0.222734	0.00121538	0.0286762	0.00361912	0.00656844	0.0323733	0.00560634	0.00636255	0	0.915406	319611	0	0
70755	cg20389361	chr1	248208929	-	0.918025	0.939015	-0.02099	-0.0322672	0.00121727	0.963392	0.792459	0.0384429	0.962733	0.908795	0.0125775	0	0.915406	226435	0	0
430612	cg09267745	chr11	40314759	-	0.0174795	0.0203107	-0.00283117	-0.14147	0.00121819	0.0487185	0.00621731	0.0107046	0.0477227	0.00775649	0.00842721	0	0.915406	404542	0	0
192395	cg24008263	chr4	128553694	-	0.0173884	0.0203665	-0.00297812	-0.148916	0.00121825	0.0521768	0.00197087	0.0113106	0.050813	0.00457487	0.0106431	0	0.915406	393974	0	0
193612	cg03327816	chr4	140879844	-	0.829483	0.858988	-0.0295053	-0.0498355	0.00121958	0.922234	0.550914	0.0775972	0.917169	0.777761	0.0310841	0	0.915406	172068	0	0
307682	cg05407418	chr7	92961200	+	0.914754	0.927815	-0.0130606	-0.0202331	0.00122052	0.953005	0.861186	0.0228245	0.984432	0.862446	0.0261077	0	0.915406	289756	0	0
685413	cg05160420	chr20	1745259	+	0.040513	0.0465052	-0.00599218	-0.161728	0.00122116	0.0733516	0.0134595	0.013125	0.0966003	0.0269925	0.0131983	0	0.915406	250331	0	0
32225	cg11235691	chr1	74821965	+	0.865688	0.888968	-0.0232798	-0.0378525	0.00122119	0.928406	0.738058	0.0413755	0.943456	0.792783	0.0334254	0	0.915406	206061	0	0
433901	cg18053972	chr11	57311076	-	0.955251	0.962907	-0.00765682	-0.011399	0.00122139	0.96911	0.936364	0.0080022	0.978408	0.943928	0.00815475	0	0.915406	377033	0	0
196609	cg00952211	chr4	157299288	-	0.960907	0.970038	-0.00913117	-0.0135048	0.00122227	0.985397	0.926973	0.0145245	0.989108	0.942074	0.0102426	0	0.915406	350582	0	0
219416	cg08846894	chr5	95493579	+	0.913138	0.935227	-0.0220885	-0.0341138	0.0012252	0.957139	0.829214	0.0309501	0.974688	0.845005	0.0232878	0	0.915406	219415	0	0
476165	cg25642567	chr12	56123483	+	0.012114	0.0162717	-0.0041577	-0.248549	0.0012254	0.0284889	3.8847e-05	0.00687944	0.0440857	0.00327176	0.00818314	0	0.915406	324459	0	0
658967	cg23228218	chr19	7908919	-	0.940288	0.924977	0.0153108	0.0234337	0.00122575	0.964126	0.911831	0.0153663	0.95868	0.737997	0.0362513	0	0.915406	269119	0	0
548791	cg18997990	chr15	44084145	-	0.0282401	0.0338104	-0.00557035	-0.196189	0.0012284	0.0529114	0.0101569	0.0117969	0.0732917	0.00845245	0.0147342	0	0.915406	264818	0	0
83431	cg01560354	chr2	43767446	+	0.163826	0.219541	-0.0557152	-0.401109	0.00123121	0.341506	0.0416997	0.081487	0.709037	0.0305572	0.123359	0	0.915406	2613	0	0
223001	cg04547002	chr5	122551801	+	0.767257	0.709758	0.0574999	0.110882	0.00123134	0.892726	0.553895	0.0808904	0.89239	0.418571	0.123482	0	0.915406	77611	0	0
596149	cg01691827	chr16	86599189	-	0.333024	0.381578	-0.0485533	-0.190988	0.00123166	0.394367	0.232218	0.0462782	0.671903	0.26023	0.0817434	0	0.915406	31362	0	0
561944	cg16118530	chr15	85145643	+	0.979751	0.973524	0.00622661	0.0091048	0.00123269	0.992195	0.963263	0.00683884	0.989814	0.948783	0.00820298	0	0.915406	413228	0	0
273929	cg04602747	chr6	118273169	-	0.313465	0.246795	0.0666702	0.332993	0.00123323	0.712885	0.0867777	0.155299	0.535607	0.0278521	0.139478	0	0.915406	5928	0	0
70382	cg15565180	chr1	247245211	+	0.954219	0.946234	0.00798556	0.011998	0.00123363	0.977501	0.927016	0.0141143	0.979653	0.907742	0.0165148	0	0.915406	368988	0	0
343009	cg16570133	chr8	76320362	-	0.0514767	0.0669959	-0.0155192	-0.324742	0.00123585	0.0848559	0.0343046	0.0147991	0.215042	0.0368237	0.0284165	0	0.915406	89056	0	0
114886	cg05348875	chr2	206628625	+	0.665439	0.599793	0.0656465	0.147507	0.00123607	0.916674	0.380035	0.139943	0.830544	0.243941	0.127885	0	0.915406	50666	0	0
642241	cg04798533	chr18	21068100	+	0.0455002	0.0555239	-0.0100237	-0.239528	0.00123631	0.130716	0.0188675	0.0262554	0.161967	0.0190013	0.0272282	0	0.915406	155089	0	0
670301	cg18059891	chr19	36499721	+	0.495427	0.450992	0.0444347	0.13276	0.00124024	0.716488	0.333109	0.0875715	0.589349	0.327334	0.0671787	0	0.915406	60047	0	0
247027	cg11817533	chr6	21523501	-	0.750364	0.783747	-0.0333828	-0.0619885	0.00124246	0.906381	0.614618	0.0630548	0.871199	0.673024	0.0461862	0	0.915406	145367	0	0
390436	cg17580673	chr10	31891554	+	0.844253	0.874429	-0.0301761	-0.0500831	0.001244	0.922044	0.706848	0.0529718	0.937442	0.815384	0.0280383	0	0.915406	171423	0	0
647350	cg20009973	chr18	55626717	+	0.467992	0.444233	0.0237596	0.0735558	0.00124556	0.587642	0.351437	0.0574989	0.588344	0.291293	0.064687	0	0.915406	124593	0	0
117449	cg07331752	chr2	219049835	+	0.965512	0.94884	0.0166715	0.0248688	0.00124599	0.984995	0.943372	0.0122968	0.98159	0.742924	0.0385955	0	0.915406	260991	0	0
621890	cg17629148	chr17	47113596	-	0.867965	0.83123	0.0367341	0.0616616	0.00124614	0.92852	0.751226	0.0414997	0.922168	0.672481	0.0563938	0	0.915406	146000	0	0
588268	cg12568634	chr16	67515132	-	0.00875434	0.0110982	-0.00234385	-0.169895	0.00124842	0.0224844	0.00191778	0.00424097	0.0237202	0.00240535	0.00472458	0	0.915406	442937	0	0
643326	cg12144870	chr18	29525892	-	0.951189	0.958581	-0.00739186	-0.0110524	0.00124901	0.9757	0.897262	0.0158548	0.991285	0.933201	0.0120139	0	0.915406	381972	0	0
402159	cg14137922	chr10	91315680	-	0.961403	0.968479	-0.00707522	-0.0104698	0.00124912	0.985293	0.925437	0.0143618	0.987969	0.940146	0.0123921	0	0.915406	390693	0	0
76117	cg21353292	chr2	16079983	+	0.0128468	0.0161041	-0.00325738	-0.192289	0.00125031	0.0223776	0.00659582	0.00455886	0.0315537	0.00429069	0.005139	0	0.915406	375173	0	0
279833	cg11182199	chr6	150161689	-	0.910273	0.919276	-0.00900392	-0.0140467	0.00125371	0.940147	0.883149	0.0111583	0.964286	0.883436	0.0142174	0	0.915406	344373	0	0
421587	cg23075970	chr11	3222445	-	0.804182	0.775547	0.0286352	0.0516541	0.0012538	0.897504	0.616653	0.0710097	0.866329	0.504897	0.0828651	0	0.915406	167586	0	0
258549	cg04302946	chr6	33386168	-	0.00786358	0.0112637	-0.00340014	-0.251373	0.00125532	0.0152559	0.00195369	0.0037226	0.0230552	0.00175278	0.00536535	0	0.915406	366276	0	0
691489	cg23574215	chr20	30555351	+	0.377398	0.331551	0.0458473	0.181717	0.0012555	0.597703	0.264021	0.0892303	0.459256	0.216508	0.0649861	0	0.915406	34688	0	0
91696	cg04067517	chr2	76017724	+	0.880606	0.866539	0.0140672	0.0229694	0.00125653	0.935547	0.797318	0.0311239	0.914125	0.680354	0.0427381	0	0.915406	271943	0	0
235235	cg16304927	chr5	168133856	+	0.874481	0.90253	-0.0280486	-0.0450403	0.00125762	0.938443	0.787748	0.042994	0.955632	0.83734	0.0298929	0	0.915406	184598	0	0
240540	cg01522062	chr5	180236936	+	0.0141292	0.0157943	-0.00166504	-0.0962687	0.00126054	0.0241137	0.00548606	0.00433155	0.0275074	0.00539627	0.00504338	0	0.915406	508150	0	0
613014	cg25673844	chr17	30470207	-	0.0067776	0.00978384	-0.00300624	-0.237786	0.0012643	0.014043	0.00134767	0.00397094	0.0213413	0.000894566	0.00510236	0	0.915406	392025	0	0
486374	cg02518216	chr12	106533903	+	0.112583	0.128471	-0.0158878	-0.175823	0.00126639	0.359935	0.0534418	0.064155	0.305718	0.0568843	0.0571022	0	0.915406	85999	0	0
406576	cg02696879	chr10	103880708	+	0.00551262	0.00761088	-0.00209826	-0.183024	0.00126804	0.0195786	0.0017892	0.00372587	0.0171649	0.0013689	0.00383791	0	0.915406	464870	0	0
31088	cg09621235	chr1	66153637	+	0.0324795	0.0405137	-0.00803418	-0.249908	0.00126876	0.0773422	0.00839901	0.0169501	0.109823	0.0124537	0.0206878	0	0.915406	194340	0	0
382485	cg10020349	chr10	1152178	-	0.958187	0.962031	-0.00384359	-0.005716	0.00126937	0.969662	0.937993	0.00738887	0.987767	0.943356	0.00938897	0	0.915406	488731	0	0
563614	cg21058182	chr15	90401931	-	0.937071	0.940527	-0.00345591	-0.00525489	0.00127244	0.977262	0.88832	0.0179861	0.981885	0.879457	0.0213547	0	0.915406	501980	0	0
308349	cg25393792	chr7	95951712	-	0.0288072	0.0344545	-0.00564729	-0.196005	0.00127256	0.093377	0.00780847	0.0169014	0.0696052	0.0129333	0.0130319	0	0.915406	262052	0	0
299236	cg09751918	chr7	39740780	-	0.11957	0.153309	-0.033739	-0.333872	0.00127353	0.257429	0.0451998	0.0628104	0.537437	0.028052	0.0899914	0	0.915406	16857	0	0
296276	cg00453374	chr7	27701825	-	0.0197208	0.0330914	-0.0133705	-0.535925	0.00127544	0.041236	0.00550244	0.00888301	0.13001	0.0110353	0.0225211	0	0.915406	109515	0	0
239372	cg27654142	chr5	178322924	-	0.0567068	0.0672622	-0.0105554	-0.211929	0.001276	0.161486	0.0211806	0.0318745	0.208599	0.0284101	0.0411767	0	0.915406	146379	0	0
137869	cg13672136	chr3	46477681	+	0.936045	0.918803	0.0172422	0.0265365	0.00127649	0.963338	0.903503	0.0142853	0.974011	0.832956	0.0316356	0	0.915406	252253	0	0
330438	cg12716367	chr8	17625476	+	0.79178	0.770381	0.0213988	0.0390275	0.00127746	0.85867	0.678393	0.0552537	0.852629	0.671297	0.0476222	0	0.915406	202323	0	0
392991	cg15247509	chr10	48416977	+	0.906383	0.871045	0.0353388	0.0567362	0.0012776	0.956496	0.777852	0.0463145	0.959596	0.700768	0.067372	0	0.915406	156145	0	0
440938	cg14599904	chr11	67236739	+	0.0122874	0.0162572	-0.00396986	-0.236488	0.00128255	0.0210881	0.00494611	0.00502251	0.0329785	0.00112543	0.00746135	0	0.915406	334120	0	0
316517	cg26221293	chr7	130354073	-	0.0206726	0.0266783	-0.00600569	-0.257976	0.00128566	0.043193	0.00611826	0.00911991	0.0623279	0.00793646	0.0130581	0	0.915406	249856	0	0
136300	cg16180367	chr3	42544082	+	0.0146032	0.0176211	-0.00301789	-0.166924	0.0012858	0.0265049	0.00347111	0.00592589	0.0297811	0.00644934	0.00537579	0	0.915406	391199	0	0
80	cg06531475	chr1	870791	-	0.426642	0.346148	0.0804941	0.293974	0.00128646	0.785177	0.166511	0.166247	0.647164	0.163826	0.112025	0	0.915406	9482	0	0
560501	cg03711182	chr15	79383924	-	0.00882274	0.0127026	-0.00387984	-0.270379	0.00128652	0.0179987	0.00181367	0.00481099	0.0517686	0.00275123	0.00870734	0	0.915406	338832	0	0
384103	cg19469999	chr10	5494333	-	0.939596	0.955494	-0.0158982	-0.0239538	0.00128733	0.970033	0.875787	0.0268473	0.987028	0.89687	0.0178207	0	0.915406	266143	0	0
695966	cg02374388	chr20	42747369	+	0.83402	0.803316	0.0307034	0.0534602	0.00128761	0.907111	0.667047	0.0544677	0.933218	0.482469	0.0842423	0	0.915406	163332	0	0
486550	cg04943586	chr12	106993938	+	0.714696	0.676382	0.0383138	0.0783639	0.00128905	0.844317	0.604727	0.0604368	0.785431	0.435473	0.0803981	0	0.915406	117040	0	0
232530	cg10462503	chr5	151281761	+	0.736545	0.83783	-0.101286	-0.183547	0.00129173	0.92024	0.43625	0.129167	0.949746	0.500856	0.104141	0	0.915406	34019	0	0
723783	cg20736874	chr22	39976268	-	0.902972	0.846606	0.0563658	0.0919385	0.00129224	0.963177	0.758157	0.0439281	0.974953	0.565627	0.0894197	0	0.915406	98265	0	0
55929	cg08843850	chr1	199092823	+	0.195544	0.23311	-0.037566	-0.242162	0.00129385	0.438679	0.0549207	0.0930685	0.566501	0.0589493	0.105857	0	0.915406	17624	0	0
86791	cg13430479	chr2	61108585	-	0.0104775	0.0129013	-0.00242381	-0.161391	0.00129628	0.0305819	0.00243104	0.0067894	0.0284467	0.00154185	0.00613228	0	0.915406	436296	0	0
246371	cg22997906	chr6	17556830	+	0.85784	0.878318	-0.020478	-0.0336471	0.00129634	0.912799	0.777578	0.0308494	0.95631	0.820628	0.0285909	0	0.915406	221069	0	0
31575	cg26110064	chr1	68154614	-	0.0960618	0.129829	-0.0337674	-0.398761	0.00129767	0.247824	0.00979454	0.0567321	0.413629	0.0378327	0.0715718	0	0.915406	16819	0	0
237221	cg08361872	chr5	173356451	-	0.2223	0.263377	-0.0410767	-0.234901	0.00129839	0.439578	0.0610438	0.0995986	0.637903	0.0864987	0.107255	0	0.915406	19165	0	0
615523	cg04211197	chr17	37482420	-	0.13739	0.171427	-0.0340374	-0.299755	0.00129845	0.310944	0.0209887	0.0764768	0.490231	0.0434378	0.0873155	0	0.915406	16425	0	0
645411	cg21851386	chr18	45457590	-	0.0169241	0.0212107	-0.00428658	-0.213141	0.00129968	0.0300057	0.00854482	0.00519666	0.0328145	0.00997122	0.00464694	0	0.915406	318310	0	0
973	cg24153574	chr1	1296956	-	0.675995	0.640827	0.0351682	0.0759243	0.00129985	0.817905	0.495463	0.0926117	0.807994	0.258462	0.125188	0	0.915406	120864	0	0
554387	cg16029760	chr15	65341902	-	0.0159792	0.0205696	-0.00459035	-0.234738	0.00130274	0.0279879	0.00351101	0.00606464	0.0465004	0.00296667	0.00822458	0	0.915406	304255	0	0
186828	cg24060475	chr4	85801119	-	0.904788	0.917541	-0.012753	-0.0199736	0.00130305	0.944933	0.835451	0.0298907	0.983723	0.756543	0.0343221	0	0.915406	291629	0	0
682836	cg06560912	chr19	56092605	-	0.0140085	0.0176874	-0.00367881	-0.205679	0.00130574	0.0268251	0.00593288	0.00522971	0.040749	0.00802799	0.00715653	0	0.915406	349784	0	0
148917	cg00381033	chr3	107298423	-	0.96754	0.957057	0.0104831	0.0155549	0.00130749	0.989749	0.952018	0.00986739	0.981779	0.862736	0.0227944	0	0.915406	328919	0	0
709443	cg06531701	chr21	39661956	+	0.105841	0.148607	-0.0427662	-0.453311	0.00130877	0.242228	0.0308577	0.0547941	0.429239	0.0262968	0.0831341	0	0.915406	7060	0	0
505364	cg02472998	chr13	45945362	+	0.0228297	0.0333639	-0.0105341	-0.40149	0.00130883	0.104016	0.00794078	0.0181305	0.0987376	0.00788594	0.0221353	0	0.915406	146702	0	0
403531	cg25968326	chr10	97051613	+	0.942882	0.920766	0.0221156	0.0338785	0.00130943	0.971747	0.901644	0.018904	0.967601	0.571754	0.0642192	0	0.915406	220229	0	0
477830	cg25932012	chr12	58062823	-	0.833949	0.85725	-0.0233011	-0.0392922	0.00130983	0.891158	0.666085	0.0502603	0.93851	0.76344	0.0359736	0	0.915406	201510	0	0
179133	cg07358117	chr4	28380245	-	0.47358	0.425567	0.0480125	0.150858	0.00130998	0.695304	0.312324	0.102999	0.653362	0.173661	0.113953	0	0.915406	48821	0	0
589281	cg24765079	chr16	68772430	+	0.776487	0.729093	0.047394	0.0896671	0.0013101	0.919317	0.586174	0.0717708	0.903403	0.365559	0.0997494	0	0.915406	101151	0	0
411656	cg21401589	chr10	123735108	-	0.594222	0.530909	0.0633127	0.159692	0.00131323	0.778493	0.44384	0.0908682	0.718649	0.243733	0.116514	0	0.915406	44255	0	0
250603	cg06122864	chr6	29629187	-	0.77066	0.700143	0.0705175	0.136586	0.00131393	0.866145	0.659207	0.0620615	0.927576	0.441599	0.110396	0	0.915406	57439	0	0
129866	cg25313870	chr3	12045723	-	0.0320698	0.0408803	-0.00881051	-0.274322	0.00131888	0.0633427	0.00963126	0.0159591	0.0813499	0.00698975	0.0158932	0	0.915406	177493	0	0
645158	cg15790925	chr18	44181656	+	0.0654017	0.0769766	-0.0115749	-0.20603	0.00131949	0.211133	0.021598	0.0383034	0.16839	0.0353257	0.0312346	0	0.915406	131384	0	0
192860	cg23673456	chr4	134002493	+	0.794139	0.778277	0.0158622	0.0287426	0.00132627	0.871268	0.6625	0.0482561	0.86249	0.667964	0.0440592	0	0.915406	241633	0	0
388120	cg00047117	chr10	21817047	-	0.131129	0.168972	-0.0378434	-0.342723	0.00132687	0.266811	0.0379089	0.0619083	0.371002	0.0588111	0.0737542	0	0.915406	11344	0	0
230857	cg06803897	chr5	147763209	+	0.021131	0.0265969	-0.0054659	-0.233369	0.00132757	0.0651317	0.000229978	0.0153907	0.0730512	0.00475081	0.0173146	0	0.915406	268649	0	0
520372	cg26206396	chr14	29234904	-	0.0901733	0.13437	-0.0441966	-0.527272	0.0013282	0.160408	0.0426116	0.0261122	0.494204	0.0538671	0.075758	0	0.915406	6212	0	0
681028	cg15008743	chr19	53142106	-	0.0859933	0.147835	-0.0618414	-0.717409	0.00132986	0.28575	0.0257866	0.0634746	0.60962	0.0294988	0.121863	0	0.915406	1534	0	0
232150	cg12483860	chr5	150460615	+	0.0128735	0.0154534	-0.00257986	-0.154178	0.00133036	0.0395505	0.00378841	0.00729326	0.0364709	0.0053191	0.00612756	0	0.915406	423735	0	0
212489	cg26974500	chr5	56469322	-	0.0109031	0.0138858	-0.00298264	-0.192432	0.00133086	0.0230689	0.000314465	0.00682363	0.0257132	0.00284549	0.00503693	0	0.915406	393641	0	0
312790	cg12458361	chr7	108166803	-	0.0128188	0.0144888	-0.00167001	-0.1019	0.00133194	0.022652	0.00275804	0.00516082	0.0266396	0.0029724	0.00594124	0	0.915406	507596	0	0
339547	cg23139584	chr8	56987506	+	0.052112	0.0767213	-0.0246093	-0.481515	0.00133238	0.181152	0.0100321	0.0343473	0.25377	0.0180749	0.0439123	0	0.915406	39411	0	0
211314	cg09054212	chr5	51304610	-	0.942717	0.968097	-0.0253798	-0.0379295	0.0013338	0.978217	0.68624	0.0595633	0.983227	0.949898	0.00738516	0	0.915406	205828	0	0
84522	cg07897193	chr2	46926272	-	0.014054	0.0168501	-0.00279609	-0.15865	0.00133487	0.0283444	0.00491577	0.00540875	0.0251973	0.00702298	0.00417126	0	0.915406	407130	0	0
517752	cg23739138	chr14	21567186	-	0.0710843	0.0752609	-0.00417658	-0.0724613	0.0013354	0.186004	0.0227373	0.0367723	0.165426	0.0348943	0.0320152	0	0.915406	323493	0	0
638713	cg24907852	chr18	712250	-	0.0204715	0.0241887	-0.00371717	-0.166058	0.00133639	0.0403101	0.011072	0.00616054	0.0392562	0.00828405	0.00730329	0	0.915406	347654	0	0
29660	cg20867240	chr1	59823591	+	0.946978	0.954354	-0.00737578	-0.0110767	0.00133955	0.974206	0.90875	0.0144933	0.9797	0.917097	0.014749	0	0.915406	381586	0	0
592446	cg07385090	chr16	78133557	-	0.00902832	0.0117432	-0.00271483	-0.192413	0.00134235	0.0213099	0.000792943	0.00555121	0.0331914	0.00126043	0.00643221	0	0.915406	413253	0	0
565507	cg23907975	chr15	96714458	-	0.578674	0.473252	0.105423	0.284695	0.00134424	0.881003	0.32646	0.147018	0.85239	0.0481952	0.156999	0	0.915406	10621	0	0
192981	cg14042568	chr4	136834873	-	0.82349	0.796776	0.0267141	0.0469969	0.00134502	0.894386	0.727878	0.0436326	0.876721	0.400516	0.0876167	0	0.915406	179357	0	0
337917	cg08428726	chr8	48318959	+	0.179908	0.22412	-0.0442121	-0.301948	0.00134512	0.3871	0.0309882	0.0870795	0.640953	0.0414005	0.112199	0	0.915406	8625	0	0
489765	cg00500705	chr12	114029659	-	0.0558381	0.0660386	-0.0102005	-0.207809	0.00134715	0.113785	0.0333711	0.0211604	0.134812	0.0220425	0.023224	0	0.915406	152140	0	0
44573	cg10890570	chr1	154154898	+	0.0182362	0.0217338	-0.00349761	-0.168475	0.00134753	0.0523251	0.000654912	0.0126554	0.0862513	0.000811205	0.0149402	0	0.915406	360211	0	0
21525	cg16585132	chr1	38464943	+	0.683942	0.759029	-0.0750873	-0.148223	0.00134754	0.849921	0.517157	0.0864617	0.867529	0.551844	0.0713233	0	0.915406	50282	0	0
145074	cg08657182	chr3	68057572	+	0.548672	0.50439	0.0442828	0.119141	0.00134793	0.78133	0.395268	0.104016	0.782349	0.112002	0.130804	0	0.915406	70410	0	0
26577	cg27113430	chr1	48964315	-	0.0464622	0.0631437	-0.0166815	-0.373448	0.00134968	0.0727354	0.0180401	0.0158125	0.166925	0.0174032	0.0332918	0	0.915406	79836	0	0
162468	cg14082278	chr3	169866910	-	0.210466	0.250096	-0.0396295	-0.238485	0.00134988	0.401276	0.0693353	0.0942244	0.668325	0.0620785	0.116704	0	0.915406	18386	0	0
672751	cg24318575	chr19	40865255	+	0.927138	0.940696	-0.0135575	-0.0207219	0.0013511	0.947105	0.891158	0.0159766	0.969115	0.901459	0.015492	0	0.915406	286238	0	0
507558	cg22805653	chr13	57460836	+	0.944362	0.958032	-0.0136699	-0.020518	0.00135211	0.970423	0.841584	0.0238819	0.975707	0.92088	0.0125377	0	0.915406	287692	0	0
32576	cg13434669	chr1	77013304	-	0.931305	0.943206	-0.0119013	-0.0181263	0.0013526	0.955412	0.90021	0.0154943	0.968228	0.913186	0.0132453	0	0.915406	305875	0	0
475287	cg02227188	chr12	54396354	-	0.267062	0.168273	0.0987887	0.636119	0.0013545	0.759357	0.0435825	0.154791	0.458602	0.0348421	0.0970825	0	0.915406	1045	0	0
668990	cg16897644	chr19	34524018	-	0.611684	0.555372	0.0563118	0.13698	0.00135459	0.770468	0.422467	0.0938441	0.709162	0.421074	0.0771945	0	0.915406	57202	0	0
608274	cg06394876	chr17	15181942	-	0.717581	0.657967	0.0596145	0.123332	0.00135743	0.911673	0.551547	0.106834	0.84365	0.439853	0.0966997	0	0.915406	67051	0	0
333826	cg03406284	chr8	27731956	+	0.927502	0.904056	0.0234455	0.0365384	0.00135796	0.956477	0.879385	0.0171737	0.96622	0.734938	0.0412898	0	0.915406	210619	0	0
57989	cg07980995	chr1	203832396	-	0.984272	0.976875	0.00739672	0.0107728	0.00135979	0.995799	0.967412	0.00743381	0.991634	0.931321	0.011955	0	0.915406	386112	0	0
104068	cg05567691	chr2	148222105	-	0.928489	0.920452	0.00803708	0.0124082	0.00135989	0.961868	0.851559	0.0252166	0.956438	0.803858	0.0298804	0	0.915406	363674	0	0
520362	cg22040144	chr14	29228646	+	0.032367	0.0406416	-0.0082746	-0.257382	0.00136074	0.0818846	0.0123829	0.0166589	0.074578	0.0188005	0.0147201	0	0.915406	188911	0	0
686591	cg05644028	chr20	3868949	-	0.210377	0.25231	-0.0419329	-0.251299	0.00136085	0.401588	0.109857	0.0758517	0.514249	0.106471	0.0810915	0	0.915406	15753	0	0
416567	cg01757745	chr10	134755601	-	0.529719	0.486452	0.0432661	0.120552	0.00136377	0.689927	0.37415	0.0805713	0.677254	0.257379	0.106988	0	0.915406	69272	0	0
344288	cg06164602	chr8	87086018	+	0.742159	0.715112	0.0270469	0.0528337	0.00136421	0.819095	0.632396	0.0572185	0.798138	0.542011	0.0572201	0	0.915406	164749	0	0
411092	cg20445950	chr10	121303044	+	0.0112038	0.0136033	-0.00239945	-0.154663	0.00136679	0.0285813	0.00311736	0.00540914	0.0297775	0.00448109	0.00653722	0	0.915406	438301	0	0
80408	cg02355885	chr2	30142990	+	0.0376143	0.044223	-0.00660874	-0.187511	0.00136968	0.0932927	0.0114287	0.0162284	0.110088	0.0154458	0.0228085	0	0.915406	231104	0	0
51263	cg18997837	chr1	171882657	+	0.0710023	0.0905948	-0.0195925	-0.312521	0.00137142	0.165118	0.0112644	0.0457605	0.357816	0.0181168	0.0575648	0	0.915406	61601	0	0
720994	cg05358754	chr22	35652215	-	0.94143	0.946926	-0.00549607	-0.00830995	0.00137145	0.976559	0.899068	0.0197232	0.975396	0.883907	0.0208529	0	0.915406	428185	0	0
101655	cg23929885	chr2	129897184	-	0.936227	0.950102	-0.0138749	-0.0210012	0.00137741	0.97017	0.888782	0.0207665	0.984684	0.912199	0.0196757	0	0.915406	284304	0	0
14167	cg00417419	chr1	23810942	+	0.0198088	0.0269766	-0.00716775	-0.310872	0.00138002	0.0491699	0.000801593	0.0109675	0.0557203	0.0096884	0.011034	0	0.915406	215668	0	0
30788	cg01002030	chr1	65211677	-	0.100728	0.121687	-0.0209588	-0.250091	0.00138071	0.321122	0.0345916	0.0667409	0.405187	0.027913	0.0719152	0	0.915406	54466	0	0
474002	cg21518208	chr12	52761416	+	0.837953	0.809245	0.0287086	0.0496903	0.001382	0.893088	0.733109	0.0467856	0.884286	0.513471	0.0797248	0	0.915406	172428	0	0
233657	cg05962755	chr5	157440814	-	0.885975	0.930159	-0.0441845	-0.0694471	0.00138416	0.956675	0.67766	0.073959	0.981988	0.828463	0.0331716	0	0.915406	131504	0	0
335392	cg26872137	chr8	35092870	+	0.110476	0.129586	-0.0191103	-0.212412	0.00138462	0.305659	0.0263216	0.0657425	0.530967	0.046864	0.0867933	0	0.915406	64213	0	0
43048	cg02290168	chr1	151255971	-	0.0282779	0.0352184	-0.00694044	-0.240396	0.00138544	0.0863867	0.0126738	0.0149005	0.0757843	0.0175798	0.015329	0	0.915406	221778	0	0
486912	cg27297576	chr12	108237150	+	0.0716088	0.0791133	-0.00750451	-0.126916	0.00138865	0.118767	0.0400083	0.02023	0.168306	0.0353577	0.0248527	0	0.915406	206952	0	0
554072	cg11741168	chr15	64673872	+	0.0208591	0.0287594	-0.00790028	-0.32885	0.00139002	0.0330886	0.00108425	0.0084061	0.0743803	0.00877338	0.0136448	0	0.915406	197448	0	0
255069	cg00098063	chr6	31866020	-	0.0069598	0.00906453	-0.00210473	-0.168772	0.00139373	0.0154057	0.00155029	0.00352502	0.0214266	0.00129032	0.00449204	0	0.915406	464313	0	0
347829	cg17193134	chr8	104202066	-	0.904703	0.885477	0.0192254	0.030646	0.00139421	0.937782	0.834274	0.025336	0.937071	0.802359	0.0298623	0	0.915406	233247	0	0
321280	cg02363526	chr7	150674012	+	0.490312	0.441761	0.0485519	0.147271	0.00139639	0.777785	0.280712	0.119735	0.75395	0.241541	0.113238	0	0.915406	50815	0	0
204580	cg25129000	chr5	3325695	-	0.954126	0.968856	-0.0147303	-0.0218754	0.00139651	0.983534	0.833447	0.0337718	0.985016	0.929736	0.0124907	0	0.915406	278594	0	0
2442	cg00584868	chr1	2344089	-	0.0250881	0.0317589	-0.00667078	-0.251101	0.00140075	0.044695	0.00652798	0.009476	0.0650927	0.0072072	0.0130319	0	0.915406	229309	0	0
617800	cg07408552	chr17	40611995	+	0.0315902	0.0412698	-0.00967954	-0.301864	0.00140168	0.0746396	0.00790622	0.0182349	0.126217	0.00867802	0.0218901	0	0.915406	161054	0	0
339995	cg01680244	chr8	59476467	-	0.151176	0.192619	-0.041443	-0.330132	0.00140303	0.322171	0.0493555	0.0832049	0.582457	0.0355821	0.104069	0	0.915406	8035	0	0
475767	cg17172595	chr12	54813531	+	0.0847943	0.100265	-0.0154708	-0.218103	0.0014044	0.13346	0.0328215	0.0226027	0.153205	0.0453217	0.0291496	0	0.915406	89455	0	0
709512	cg23340514	chr21	39870704	+	0.0280675	0.0339154	-0.00584789	-0.206167	0.00140462	0.0918201	0.00839312	0.0166018	0.0840976	0.0177052	0.0160221	0	0.915406	255127	0	0
394009	cg05867154	chr10	52835002	+	0.0304189	0.0628933	-0.0324744	-0.850755	0.00140517	0.155004	0.00367304	0.0321304	0.291811	0.00869704	0.0648663	0	0.915406	19096	0	0
677406	cg07038690	chr19	48167405	-	0.247126	0.299245	-0.0521193	-0.266276	0.00140551	0.408051	0.0955509	0.0958457	0.586242	0.121849	0.0974724	0	0.915406	13149	0	0
409276	cg02580546	chr10	115251965	+	0.733202	0.675372	0.0578297	0.116867	0.0014058	0.85299	0.526397	0.0939218	0.858267	0.408761	0.0967389	0	0.915406	72302	0	0
543863	cg10098386	chr15	26375632	+	0.501904	0.608488	-0.106584	-0.272872	0.00140588	0.819821	0.117221	0.1496	0.961875	0.412946	0.122406	0	0.915406	12178	0	0
134045	cg19575696	chr3	32544550	-	0.00503258	0.00676391	-0.00173132	-0.157265	0.00140595	0.00940957	0.00119929	0.00209079	0.0170442	0.00195367	0.00373601	0	0.915406	501217	0	0
471079	cg05706766	chr12	47740526	-	0.871549	0.900453	-0.028904	-0.0465438	0.00140714	0.953384	0.769707	0.043678	0.957243	0.798426	0.0398494	0	0.915406	180582	0	0
522413	cg18976418	chr14	39735496	-	0.100272	0.136378	-0.0361064	-0.408636	0.00140956	0.250446	0.0318675	0.0608021	0.471247	0.0329562	0.0800506	0	0.915406	13422	0	0
477824	cg21910536	chr12	58027396	-	0.0365978	0.0499105	-0.0133127	-0.362548	0.0014119	0.0861063	0.0108534	0.0173195	0.119904	0.0114822	0.0241374	0	0.915406	110101	0	0
499279	cg09203312	chr13	20805196	+	0.616268	0.557552	0.0587162	0.142028	0.00141236	0.852749	0.377138	0.11494	0.749565	0.265485	0.101168	0	0.915406	53970	0	0
200000	cg00472292	chr4	184580884	-	0.00943579	0.0123862	-0.00295039	-0.203893	0.0014134	0.0175715	0.00187005	0.00431529	0.02632	0.00360895	0.0064371	0	0.915406	395923	0	0
141173	cg23078565	chr3	52090732	+	0.0124786	0.0160261	-0.00354755	-0.21141	0.00141354	0.0224277	0.00452725	0.00481305	0.030555	0.00272109	0.0064806	0	0.915406	357319	0	0
510591	cg26886381	chr13	96296979	+	0.0139401	0.0174137	-0.00347365	-0.195471	0.00141359	0.0245268	0.00236167	0.00598321	0.0439009	0.00887723	0.00691433	0	0.915406	361706	0	0
574146	cg04892758	chr16	7358470	-	0.77632	0.738529	0.0377909	0.0710581	0.0014146	0.85294	0.675285	0.0510894	0.822006	0.526378	0.0599199	0	0.915406	128687	0	0
512826	cg07775431	chr13	107160426	+	0.0246411	0.0370793	-0.0124383	-0.44261	0.00141907	0.053353	0.00346976	0.0133263	0.10932	0.00579422	0.0193393	0	0.915406	120192	0	0
7495	cg23610023	chr1	10003460	+	0.0134141	0.0164326	-0.00301849	-0.17494	0.00142186	0.0213779	0.00423968	0.00364408	0.0259247	0.0106459	0.00405031	0	0.915406	391156	0	0
443846	cg08966189	chr11	71823395	+	0.0149039	0.0196797	-0.00477585	-0.253107	0.0014225	0.0292489	0.00317103	0.0067467	0.0458044	0.00781925	0.00837256	0	0.915406	296058	0	0
425202	cg11000754	chr11	12747544	+	0.399751	0.325825	0.073926	0.287038	0.00142327	0.713184	0.202321	0.127511	0.549449	0.188265	0.101419	0	0.915406	10285	0	0
132069	cg14536682	chr3	18025303	-	0.00679443	0.00964438	-0.00284995	-0.226134	0.00142386	0.0168074	0.00137071	0.00407455	0.0422515	0.00154705	0.00762365	0	0.915406	403181	0	0
193565	cg02347255	chr4	140778415	+	0.118243	0.14889	-0.0306476	-0.309154	0.0014268	0.322443	0.0304919	0.0679703	0.42898	0.0294213	0.0784354	0	0.915406	22825	0	0
455224	cg11660146	chr11	120110688	-	0.0835034	0.0630434	0.02046	0.356266	0.00142705	0.276168	0.0456043	0.0453646	0.138474	0.0292745	0.0224078	0	0.915406	57005	0	0
655441	cg02720697	chr19	3359204	-	0.0469772	0.0532631	-0.00628584	-0.150978	0.00142711	0.0737778	0.0189544	0.0140699	0.112149	0.0181476	0.0208819	0	0.915406	240800	0	0
118285	cg03546879	chr2	220094399	+	0.0358432	0.044599	-0.00875584	-0.252168	0.0014278	0.0730567	0.00546838	0.0161989	0.0756333	0.0217059	0.0136339	0	0.915406	178569	0	0
238034	cg07179068	chr5	176060165	+	0.682707	0.628693	0.0540136	0.117122	0.00142797	0.809609	0.493767	0.0860836	0.834056	0.253775	0.115875	0	0.915406	72070	0	0
440248	cg21191710	chr11	66512979	+	0.00945402	0.013828	-0.00437402	-0.292592	0.00142833	0.0187606	3.8847e-05	0.00476456	0.0324293	0.00100503	0.00659172	0	0.915406	314193	0	0
661722	cg06899953	chr19	12163679	-	0.0411343	0.0514258	-0.0102916	-0.264555	0.00142864	0.078888	0.0175666	0.0141506	0.159605	0.0274191	0.0280885	0	0.915406	150567	0	0
356870	cg14425468	chr8	144437541	+	0.0239013	0.035359	-0.0114577	-0.420047	0.00142936	0.0553927	3.8847e-05	0.0113016	0.108146	0.0104341	0.0197419	0	0.915406	132975	0	0
275718	cg05712302	chr6	131571441	-	0.0924361	0.114959	-0.0225229	-0.286731	0.00142951	0.284217	0.0114092	0.0706833	0.438094	0.012606	0.0782972	0	0.915406	47280	0	0
685029	cg17762670	chr20	821932	-	0.056375	0.0647232	-0.00834817	-0.170916	0.00142951	0.143655	0.0190803	0.0311364	0.256478	0.0221967	0.0406395	0	0.915406	187255	0	0
393786	cg06098215	chr10	51575702	-	0.107889	0.138412	-0.030523	-0.332179	0.00142968	0.291849	0.0181912	0.0696528	0.46706	0.0286704	0.0866467	0	0.915406	23097	0	0
717958	cg16692439	chr22	26831446	-	0.130354	0.163074	-0.0327193	-0.302312	0.00143056	0.306069	0.0558814	0.067438	0.531874	0.0324565	0.0914115	0	0.915406	18651	0	0
475276	cg03215137	chr12	54393687	-	0.0955072	0.13162	-0.0361129	-0.424685	0.00143139	0.384501	0.0421488	0.0637847	0.457351	0.0471584	0.0932811	0	0.915406	13415	0	0
90178	cg14447606	chr2	72370328	+	0.0329164	0.0384111	-0.00549464	-0.173807	0.00143192	0.0503021	0.0171879	0.00911198	0.0743039	0.0190881	0.0109982	0	0.915406	267587	0	0
679939	cg25309343	chr19	51226207	+	0.44754	0.416404	0.0311363	0.101678	0.00143462	0.563066	0.315909	0.0738854	0.528465	0.30488	0.0681956	0	0.915406	86960	0	0
17127	cg15672949	chr1	28462234	+	0.0790447	0.110192	-0.0311471	-0.432737	0.00143467	0.20976	0.0234731	0.049266	0.394203	0.0132776	0.0696212	0	0.915406	21726	0	0
466589	cg19140085	chr12	16759565	+	0.0241202	0.0284862	-0.00436599	-0.173715	0.0014374	0.0480448	0.0106172	0.00891404	0.0439696	0.0136449	0.0087386	0	0.915406	314528	0	0
387840	cg15657225	chr10	20105179	+	0.098084	0.132965	-0.034881	-0.403509	0.00143798	0.202834	0.0219391	0.050856	0.370861	0.0200415	0.0704473	0	0.915406	15141	0	0
92479	cg02242344	chr2	85640943	+	0.0535593	0.0718016	-0.0182423	-0.364026	0.0014388	0.104153	0.0206863	0.0207987	0.15593	0.0276172	0.0299068	0	0.915406	69394	0	0
197355	cg15498306	chr4	164534641	+	0.0270948	0.0399246	-0.0128298	-0.428533	0.00143889	0.046736	0.0108841	0.0111945	0.0825136	0.0157289	0.0155538	0	0.915406	115483	0	0
80704	cg26988215	chr2	31361757	+	0.031298	0.0352194	-0.00392146	-0.130872	0.00144088	0.0650657	0.0126848	0.0118438	0.0570868	0.0167648	0.00970828	0	0.915406	336653	0	0
386990	cg05265799	chr10	15078070	+	0.825633	0.792525	0.0331082	0.0583234	0.0014415	0.919642	0.689607	0.0576023	0.8784	0.673438	0.053491	0	0.915406	152774	0	0
409890	cg09031776	chr10	117735350	-	0.504511	0.439772	0.0647392	0.194009	0.00144298	0.698005	0.324843	0.08557	0.60675	0.238684	0.0917263	0	0.915406	30326	0	0
202351	cg07455474	chr5	515351	+	0.57544	0.505992	0.069448	0.182173	0.00144339	0.740006	0.382184	0.108846	0.740641	0.27704	0.108059	0	0.915406	34517	0	0
68090	cg09169938	chr1	236306000	+	0.0101205	0.0120346	-0.00191414	-0.131107	0.0014451	0.0210356	0.00281894	0.00549196	0.0207892	0.00357721	0.00413652	0	0.915406	482721	0	0
597560	cg02808931	chr16	88503009	+	0.925088	0.935254	-0.0101657	-0.0155994	0.00144747	0.960066	0.874857	0.0162388	0.960862	0.882352	0.0161077	0	0.915406	328489	0	0
13704	cg25672398	chr1	22944795	-	0.357694	0.30574	0.0519543	0.21977	0.00144763	0.610326	0.127074	0.104878	0.513834	0.115968	0.0863934	0	0.915406	22797	0	0
164094	cg12797197	chr3	179276748	+	0.0136796	0.0187929	-0.00511329	-0.282068	0.00144814	0.0335174	0.000259562	0.00895943	0.0427306	0.00240624	0.00889314	0	0.915406	282203	0	0
409878	cg10787364	chr10	117639335	-	0.620634	0.54963	0.0710038	0.172329	0.00145142	0.757029	0.412053	0.10021	0.751646	0.365139	0.0908354	0	0.915406	38405	0	0
554045	cg09894605	chr15	64648051	+	0.0250249	0.0306406	-0.00561573	-0.214542	0.00145279	0.0407273	0.0111593	0.00863608	0.0760061	0.0159011	0.0119515	0	0.915406	263212	0	0
552447	cg10156382	chr15	59588367	+	0.145352	0.193836	-0.0484841	-0.391869	0.00145427	0.311675	0.0462515	0.0721783	0.530747	0.0305456	0.0992629	0	0.915406	4281	0	0
132274	cg03431618	chr3	20080259	+	0.0480175	0.0538304	-0.00581284	-0.137754	0.0014543	0.113936	0.00781165	0.0305111	0.152934	0.0111833	0.028147	0	0.915406	256370	0	0
611982	cg01085105	chr17	27399601	-	0.436169	0.403904	0.0322652	0.108295	0.00145481	0.539779	0.338369	0.0562334	0.602706	0.235697	0.0775215	0	0.915406	80066	0	0
494424	cg13288633	chr12	124516874	+	0.587457	0.510314	0.0771434	0.199453	0.00145664	0.7895	0.352555	0.120812	0.729903	0.142447	0.121982	0	0.915406	28627	0	0
219580	cg00081100	chr5	96031557	+	0.955826	0.965963	-0.010137	-0.0150632	0.00145866	0.980588	0.923165	0.01343	0.986705	0.943711	0.00971232	0	0.915406	333734	0	0
581679	cg27583149	chr16	31105482	+	0.0169441	0.0194891	-0.00254494	-0.130209	0.00145984	0.0356724	0.00408281	0.00782267	0.0436561	0.00444156	0.00807816	0	0.915406	426521	0	0
324402	cg14091258	chr7	157406607	+	0.585814	0.655848	-0.0700349	-0.160333	0.00146352	0.771993	0.378724	0.111079	0.848426	0.440619	0.0944245	0	0.915406	43947	0	0
594168	cg05583681	chr16	84179101	-	0.0694629	0.0800779	-0.010615	-0.180893	0.00146734	0.261697	0.0240289	0.0431241	0.162144	0.0332901	0.0300469	0	0.915406	145416	0	0
391102	cg26252498	chr10	34865917	-	0.772227	0.735531	0.0366958	0.0693185	0.00146743	0.850911	0.629399	0.0530514	0.853082	0.587662	0.0681026	0	0.915406	131736	0	0
493581	cg23970703	chr12	123319216	+	0.0238081	0.0277805	-0.00397235	-0.160271	0.00146882	0.0641363	0.00341238	0.0145837	0.0578936	0.0112721	0.0116181	0	0.915406	334008	0	0
413261	cg19247001	chr10	127512041	-	0.00674259	0.00828309	-0.00154049	-0.126987	0.00146949	0.0155149	0.00226526	0.00360487	0.0168488	0.00291418	0.00328329	0	0.915406	521821	0	0
345257	cg27238381	chr8	94929026	-	0.0177428	0.0207447	-0.00300191	-0.148225	0.00147019	0.0310364	0.00852808	0.0061699	0.0327731	0.00664314	0.00690492	0	0.915406	392285	0	0
596259	cg13391965	chr16	86748275	+	0.550049	0.516649	0.0333996	0.0887102	0.00147073	0.677463	0.411842	0.0780428	0.656843	0.381274	0.0715502	0	0.915406	102423	0	0
382609	cg03743191	chr10	1258225	+	0.895163	0.856732	0.0384311	0.0625918	0.00147094	0.969219	0.796178	0.0389265	0.935069	0.688129	0.062328	0	0.915406	144178	0	0
44646	cg14859874	chr1	154238265	+	0.378491	0.521163	-0.142672	-0.451273	0.00147169	0.909299	0.00181776	0.314968	0.958695	0.00197969	0.272086	0	0.915406	1462	0	0
148780	cg27350073	chr3	105960717	-	0.920608	0.895205	0.0254031	0.0399292	0.00147486	0.94515	0.866087	0.0208198	0.952539	0.66769	0.0561739	0	0.915406	199542	0	0
653683	cg07976359	chr19	1718954	+	0.082189	0.0976579	-0.0154688	-0.223787	0.00147487	0.120591	0.0501228	0.0188751	0.258628	0.0607356	0.0334484	0	0.915406	89475	0	0
509248	cg26234463	chr13	79160885	+	0.253277	0.206352	0.046926	0.283207	0.00147539	0.529398	0.12699	0.116249	0.406706	0.0722533	0.0695274	0	0.915406	10832	0	0
298794	cg23404319	chr7	37715529	-	0.158942	0.203676	-0.0447344	-0.3389	0.00147748	0.334526	0.0120511	0.0821898	0.525223	0.0501223	0.0921101	0	0.915406	5920	0	0
478504	cg24413007	chr12	62860470	-	0.0349855	0.0410862	-0.00610069	-0.183473	0.00147956	0.0659447	0.0112323	0.0106628	0.0651774	0.00182857	0.0131435	0	0.915406	246754	0	0
427438	cg03908932	chr11	20219546	+	0.466124	0.372345	0.0937788	0.316461	0.00147983	0.771718	0.252013	0.128494	0.59677	0.0920918	0.129925	0	0.915406	7260	0	0
666033	cg10792987	chr19	18575406	+	0.419839	0.377859	0.041981	0.148268	0.00148009	0.559801	0.266052	0.0853844	0.640029	0.0986782	0.130053	0	0.915406	50255	0	0
256396	cg08563982	chr6	32306373	-	0.967816	0.974879	-0.00706283	-0.0103832	0.00148226	0.983834	0.936689	0.0114363	0.991741	0.959612	0.0087699	0	0.915406	392038	0	0
232190	cg01384518	chr5	150495060	+	0.0471912	0.0654865	-0.0182954	-0.400427	0.00148235	0.0757761	0.030203	0.0118892	0.120309	0.032368	0.0205741	0	0.915406	69054	0	0
55409	cg01974330	chr1	196177626	+	0.946178	0.955353	-0.00917465	-0.0137768	0.00148266	0.965598	0.914734	0.0139846	0.983313	0.913844	0.0158293	0	0.915406	347489	0	0
97143	cg14209299	chr2	107502793	-	0.0182432	0.0214155	-0.00317223	-0.15357	0.00148617	0.0421716	0.00460324	0.00933024	0.0586119	0.00815968	0.0112673	0	0.915406	380629	0	0
35434	cg22355895	chr1	93616128	-	0.954866	0.96499	-0.0101244	-0.0150594	0.00148643	0.982309	0.937105	0.0121702	0.987465	0.929943	0.0155668	0	0.915406	333769	0	0
298884	cg10754659	chr7	38110151	-	0.94401	0.93176	0.0122494	0.018644	0.00148699	0.984856	0.83861	0.0290652	0.978664	0.804872	0.0315578	0	0.915406	301765	0	0
668443	cg14754151	chr19	33162944	-	0.106588	0.149669	-0.0430812	-0.453666	0.00148865	0.23402	0.0275007	0.0488788	0.443561	0.0343	0.0787038	0	0.915406	6878	0	0
214555	cg14766524	chr5	68663909	-	0.788331	0.81334	-0.0250093	-0.0445019	0.00148926	0.842096	0.688655	0.0343243	0.932227	0.722191	0.0409611	0	0.915406	186064	0	0
691046	cg24744748	chr20	26128271	-	0.717079	0.765925	-0.0488459	-0.0938048	0.00149204	0.851449	0.493482	0.0852517	0.850784	0.583969	0.0572821	0	0.915406	95960	0	0
465767	cg19817757	chr12	13142313	-	0.948227	0.954593	-0.00636596	-0.00955282	0.00149259	0.968858	0.930105	0.00918266	0.980623	0.907429	0.01244	0	0.915406	405448	0	0
468417	cg06568330	chr12	27863683	-	0.0178132	0.0217627	-0.00394946	-0.191562	0.00149372	0.034822	0.00605337	0.00604808	0.037352	0.0118599	0.00570225	0	0.915406	335207	0	0
127288	cg06704002	chr2	242990305	-	0.911237	0.934727	-0.0234902	-0.0363255	0.00149467	0.962383	0.717289	0.052842	0.974512	0.809565	0.0378497	0	0.915406	211417	0	0
428864	cg08976874	chr11	31885698	-	0.778095	0.841936	-0.0638415	-0.112376	0.00149469	0.927551	0.219575	0.13911	0.929257	0.610726	0.0799865	0	0.915406	76229	0	0
42003	cg15636040	chr1	147142673	+	0.00582774	0.00735402	-0.00152628	-0.132814	0.00149692	0.0127288	0.00197369	0.00282717	0.01213	0.00140887	0.00254163	0	0.915406	523396	0	0
524840	cg12192145	chr14	55849528	-	0.902083	0.907896	-0.00581258	-0.00916492	0.00149717	0.944118	0.830274	0.0291448	0.958068	0.810935	0.033387	0	0.915406	412210	0	0
612729	cg24425628	chr17	29625626	+	0.961224	0.970271	-0.00904683	-0.0133763	0.00149731	0.980861	0.925644	0.0147388	0.989008	0.925421	0.0131157	0	0.915406	352020	0	0
647274	cg20477402	chr18	55328421	-	0.889824	0.90687	-0.017046	-0.0270744	0.00150155	0.927018	0.825017	0.0284063	0.950896	0.8446	0.0245395	0	0.915406	249608	0	0
168451	cg12155036	chr3	194015171	+	0.594084	0.549705	0.0443794	0.110083	0.00150168	0.789842	0.44054	0.0801741	0.766134	0.354535	0.0947907	0	0.915406	78401	0	0
225734	cg01784406	chr5	134102698	+	0.955404	0.949427	0.00597686	0.00895956	0.00150447	0.971111	0.930246	0.0102724	0.971408	0.907617	0.0135146	0	0.915406	415813	0	0
390128	cg13516719	chr10	30638507	-	0.769529	0.698156	0.071373	0.138536	0.00150939	0.869164	0.598378	0.0741141	0.860388	0.404668	0.0999302	0	0.915406	56201	0	0
66727	cg04250837	chr1	231765185	+	0.521588	0.473176	0.0484119	0.137759	0.00151386	0.668105	0.338211	0.0869544	0.688327	0.293561	0.0889902	0	0.915406	56688	0	0
510139	cg18339591	chr13	94022280	-	0.565652	0.531537	0.0341145	0.0881357	0.0015142	0.740289	0.438345	0.0855731	0.676534	0.36041	0.0736481	0	0.915406	103153	0	0
342901	cg23779890	chr8	75262522	-	0.1014	0.134735	-0.0333355	-0.377671	0.00151534	0.198663	0.0551361	0.0335218	0.290714	0.0641511	0.0488777	0	0.915406	17535	0	0
5155	cg19694465	chr1	6267579	-	0.842722	0.774088	0.0686345	0.121061	0.00151649	0.911487	0.643908	0.0731729	0.961813	0.621604	0.0940665	0	0.915406	68845	0	0
34644	cg17256681	chr1	90344715	-	0.948086	0.953688	-0.00560189	-0.00841081	0.00151741	0.97694	0.897234	0.0223159	0.983777	0.903954	0.0202944	0	0.915406	426138	0	0
310185	cg06330722	chr7	100201795	-	0.0186746	0.02388	-0.00520544	-0.240662	0.00151981	0.0373433	0.00791082	0.00794429	0.0362049	0.0110587	0.00671247	0	0.915406	278512	0	0
48620	cg23915527	chr1	161368787	+	0.404449	0.28501	0.119439	0.490433	0.00152151	0.700793	0.125334	0.168005	0.545232	0.150853	0.107989	0	0.915406	1173	0	0
621055	cg10623571	chr17	46184897	+	0.0128294	0.0156158	-0.00278645	-0.166144	0.00152154	0.0282361	0.00138074	0.00646896	0.0256505	0.00660551	0.00516876	0	0.915406	407830	0	0
67459	cg11587451	chr1	234749176	+	0.0612283	0.0668889	-0.00566067	-0.110326	0.00152175	0.232324	0.00630668	0.0504596	0.257056	0.0151648	0.0514957	0	0.915406	261612	0	0
589312	cg08285862	chr16	68845908	-	0.956945	0.963469	-0.0065246	-0.00970209	0.00152361	0.977989	0.931994	0.0100298	0.985273	0.924335	0.0116853	0	0.915406	402944	0	0
182603	cg01575886	chr4	55809673	-	0.770686	0.734238	0.0364476	0.0689776	0.00152384	0.873965	0.637472	0.0519829	0.867004	0.573398	0.0602002	0	0.915406	132357	0	0
8011	cg24102726	chr1	10855553	+	0.0117192	0.0169514	-0.00523222	-0.31139	0.00152398	0.0265289	0.000822465	0.0069647	0.0451797	0.00516455	0.00859876	0	0.915406	277441	0	0
71063	cg27366669	chr2	265069	-	0.0109867	0.0143444	-0.00335771	-0.214115	0.00152416	0.0190516	0.00267483	0.00433773	0.0262281	0.00650796	0.0051156	0	0.915406	368849	0	0
469433	cg10988144	chr12	32831975	+	0.0113576	0.0144642	-0.00310666	-0.195927	0.00152766	0.0234288	0.00441461	0.00383541	0.0306999	0.0085779	0.00444006	0	0.915406	385116	0	0
159013	cg06728055	chr3	149294286	-	0.188998	0.243088	-0.0540897	-0.346883	0.00152798	0.332217	0.095818	0.0663182	0.433265	0.108649	0.0792292	0	0.915406	5002	0	0
435837	cg04230589	chr11	61735144	+	0.0098416	0.0119804	-0.00213881	-0.14769	0.00152846	0.0227855	0.000838474	0.00551898	0.0289303	0.00575121	0.00527077	0	0.915406	461143	0	0
99426	cg14374028	chr2	120049923	-	0.427092	0.362767	0.0643258	0.229666	0.00153058	0.626084	0.216637	0.107988	0.537314	0.0872062	0.109149	0	0.915406	20320	0	0
104085	cg18733215	chr2	148390025	+	0.820413	0.791684	0.0287291	0.0507955	0.00153233	0.918124	0.685428	0.0481889	0.900241	0.623293	0.0486441	0	0.915406	169685	0	0
573909	cg02859934	chr16	5083072	+	0.499351	0.457961	0.0413897	0.122271	0.00153611	0.721782	0.344624	0.0884343	0.655274	0.202723	0.103551	0	0.915406	67906	0	0
712313	cg25526717	chr21	45719687	+	0.0204455	0.0242436	-0.00379808	-0.169605	0.00153972	0.0386029	0.0131248	0.00596446	0.0390525	0.013719	0.00698603	0	0.915406	343269	0	0
703421	cg14966074	chr20	61299190	+	0.94512	0.952619	-0.00749838	-0.011282	0.00154197	0.963291	0.917521	0.0111427	0.973295	0.924817	0.0114765	0	0.915406	378681	0	0
152585	cg03518058	chr3	124606583	-	0.040254	0.0454451	-0.00519115	-0.141823	0.00154229	0.0996192	0.0161894	0.0160514	0.0753634	0.019196	0.0129396	0	0.915406	279107	0	0
352976	cg23297661	chr8	131929912	-	0.828683	0.89145	-0.0627666	-0.104121	0.00154244	0.93789	0.382565	0.117448	0.952283	0.777895	0.0478487	0	0.915406	84347	0	0
621199	cg24948406	chr17	46608268	-	0.964184	0.971215	-0.00703088	-0.0103748	0.00154293	0.98051	0.944956	0.0107086	0.986018	0.956058	0.0070576	0	0.915406	392155	0	0
2663	cg06839900	chr1	2461900	-	0.0282312	0.0341706	-0.00593941	-0.208336	0.00154319	0.0738972	0.00862813	0.0154391	0.111373	0.012415	0.0202002	0	0.915406	252045	0	0
601722	cg05879505	chr17	1926210	+	0.0300263	0.0362628	-0.00623647	-0.208903	0.00154323	0.080184	0.0128221	0.0133586	0.0689734	0.0180911	0.0131557	0	0.915406	242384	0	0
16749	cg16371039	chr1	27834987	-	0.913503	0.920567	-0.0070641	-0.0109935	0.0015435	0.950926	0.885505	0.0141804	0.97412	0.875314	0.0157934	0	0.915406	382828	0	0
359829	cg08487304	chr9	5799460	-	0.0688173	0.082267	-0.0134496	-0.227301	0.00154694	0.242666	0.0248652	0.0439631	0.217893	0.0155944	0.0451098	0	0.915406	108682	0	0
500430	cg20715779	chr13	25034342	-	0.919638	0.927798	-0.00815992	-0.012608	0.00154773	0.949428	0.860356	0.0196269	0.970021	0.879664	0.0202172	0	0.915406	361167	0	0
61956	cg25725454	chr1	215883591	+	0.592067	0.535471	0.0565956	0.142421	0.00154799	0.766586	0.424445	0.0976954	0.725411	0.363023	0.0852646	0	0.915406	53739	0	0
118652	cg18395327	chr2	220379109	-	0.0272932	0.029029	-0.00173587	-0.0656367	0.00155109	0.0517033	0.00772958	0.0132842	0.0454451	0.00916851	0.0103519	0	0.915406	500746	0	0
525033	cg11121623	chr14	56586572	-	0.0779586	0.0968673	-0.0189087	-0.280925	0.00155141	0.154833	0.025684	0.0348072	0.205202	0.028498	0.0426425	0	0.915406	65360	0	0
691434	cg27475076	chr20	30458103	+	0.0370744	0.0439249	-0.00685043	-0.196007	0.00155247	0.0654433	0.0185101	0.0135073	0.0722361	0.0239168	0.0135474	0	0.915406	224242	0	0
42741	cg15441434	chr1	150898392	+	0.222947	0.178848	0.0440991	0.302777	0.00155294	0.355813	0.0830254	0.081373	0.363751	0.0308023	0.0858562	0	0.915406	8551	0	0
86836	cg00298910	chr2	61244870	-	0.00900309	0.0108983	-0.00189518	-0.137149	0.00155639	0.0206736	0.0034778	0.00489517	0.0246946	0.00214005	0.00526208	0	0.915406	484614	0	0
720414	cg04243368	chr22	32366128	-	0.193086	0.240381	-0.0472954	-0.302037	0.00155766	0.350189	0.0327363	0.080191	0.463953	0.0720626	0.0737094	0	0.915406	8613	0	0
133436	cg18056973	chr3	29322342	+	0.0292947	0.0327351	-0.0034404	-0.121087	0.00155798	0.0504948	0.0132032	0.00938495	0.0761843	0.017566	0.0116656	0	0.915406	363784	0	0
28792	cg14620967	chr1	55531450	-	0.825801	0.838948	-0.0131475	-0.0225176	0.00155846	0.888083	0.763727	0.0334766	0.914131	0.765803	0.0369259	0	0.915406	274591	0	0
126262	cg03087247	chr2	242006772	-	0.937316	0.957339	-0.0200224	-0.0301748	0.00155991	0.980766	0.780184	0.0463731	0.98286	0.920306	0.0152275	0	0.915406	235281	0	0
558950	cg12283746	chr15	75639596	-	0.0543186	0.0603768	-0.00605817	-0.129863	0.0015609	0.12516	0.0265293	0.023061	0.179834	0.0267369	0.0314227	0	0.915406	248131	0	0
383474	cg18454774	chr10	3378983	+	0.962289	0.965754	-0.00346478	-0.00513195	0.00156159	0.976094	0.941086	0.0102542	0.99001	0.94352	0.0111134	0	0.915406	505710	0	0
269956	cg14346602	chr6	96035778	-	0.967711	0.975971	-0.00825939	-0.0121362	0.00156412	0.992507	0.930066	0.0123442	0.995893	0.959453	0.00884935	0	0.915406	367166	0	0
727039	cg19439427	chr22	46212247	-	0.979231	0.982107	-0.00287573	-0.00418788	0.00156455	0.994686	0.966047	0.00648313	0.997082	0.96234	0.00752814	0	0.915406	536579	0	0
56386	cg06353614	chr1	201083479	-	0.0138156	0.0168067	-0.00299105	-0.170684	0.00156495	0.0249481	0.00418903	0.00510497	0.0288707	0.00781182	0.00500995	0	0.915406	393026	0	0
229691	cg18767162	chr5	142061399	+	0.932291	0.938258	-0.00596701	-0.009107	0.00156757	0.960457	0.903591	0.0136823	0.964947	0.905358	0.0141963	0	0.915406	413199	0	0
468059	cg04628648	chr12	26676779	+	0.153478	0.199107	-0.0456285	-0.355141	0.0015679	0.359168	0.026864	0.0910661	0.604119	0.0230105	0.10533	0	0.915406	5489	0	0
420022	cg01705897	chr11	1986915	+	0.896877	0.864639	0.0322382	0.0522195	0.00156808	0.949574	0.808383	0.0383387	0.939249	0.739579	0.0474888	0	0.915406	166218	0	0
217337	cg13999415	chr5	81047848	+	0.115967	0.1525	-0.0365338	-0.367402	0.00156912	0.285582	0.0479219	0.0519365	0.366154	0.0539072	0.072792	0	0.915406	12887	0	0
79786	cg15947193	chr2	27997000	-	0.115936	0.150215	-0.0342788	-0.347316	0.00156928	0.293822	0.011825	0.0625679	0.439979	0.0348309	0.0761736	0	0.915406	16041	0	0
674084	cg11791136	chr19	42788257	-	0.0211205	0.0277834	-0.00666291	-0.279888	0.00157001	0.0369401	0.00223936	0.00897072	0.048826	0.0117212	0.009514	0	0.915406	229529	0	0
186156	cg02175873	chr4	82964079	+	0.83848	0.807441	0.0310397	0.0537673	0.00157058	0.931207	0.578237	0.0875675	0.901886	0.672843	0.061788	0	0.915406	162587	0	0
238263	cg15357821	chr5	176316988	+	0.838273	0.797156	0.0411174	0.0716818	0.00157256	0.900666	0.732202	0.0484705	0.886809	0.523297	0.08003	0	0.915406	127621	0	0
710701	cg15984778	chr21	43481772	+	0.0601506	0.0546253	0.00552533	0.118357	0.00157318	0.266355	0.0250554	0.0514736	0.136738	0.0166346	0.0308043	0	0.915406	266464	0	0
167885	cg18780257	chr3	192126023	+	0.0858216	0.0961144	-0.0102929	-0.147199	0.00157884	0.146424	0.0436162	0.0267754	0.184925	0.0416238	0.0349541	0	0.915406	150553	0	0
549261	cg21842999	chr15	45475008	-	0.804258	0.771756	0.0325023	0.0587682	0.0015812	0.863764	0.681079	0.0464902	0.847163	0.656763	0.0532718	0	0.915406	151895	0	0
327793	cg22018862	chr8	6086849	+	0.247876	0.295302	-0.0474254	-0.243556	0.0015826	0.495542	0.0862991	0.101758	0.640473	0.0970782	0.111646	0	0.915406	17317	0	0
233796	cg16793592	chr5	158407204	-	0.585872	0.500122	0.0857496	0.224159	0.00158779	0.87774	0.433731	0.106047	0.699115	0.250027	0.10917	0	0.915406	21654	0	0
298682	cg03372526	chr7	37248241	-	0.0430093	0.0588132	-0.015804	-0.376441	0.00158975	0.171819	0.00865325	0.0415472	0.171255	0.00516101	0.0401431	0	0.915406	86634	0	0
301302	cg02507246	chr7	47612964	+	0.931003	0.919529	0.0114742	0.0176997	0.00159026	0.966691	0.870607	0.0245366	0.959698	0.838789	0.0278477	0	0.915406	309415	0	0
661865	cg25266109	chr19	12404608	+	0.00732859	0.0101585	-0.00282988	-0.218232	0.00159065	0.0167254	0.00116198	0.00436985	0.018095	0.00252047	0.00452018	0	0.915406	404655	0	0
158485	cg08889797	chr3	147106489	-	0.0503535	0.0641788	-0.0138254	-0.297571	0.00159081	0.0845658	0.0313288	0.0143286	0.115025	0.0363164	0.0188418	0	0.915406	104597	0	0
304865	cg25770411	chr7	73946901	+	0.925837	0.936825	-0.0109881	-0.0168406	0.00159253	0.960948	0.892906	0.0181478	0.96781	0.882083	0.0183669	0	0.915406	316835	0	0
358581	cg07969649	chr8	145814050	-	0.904981	0.925031	-0.0200503	-0.0312729	0.00159339	0.938168	0.838117	0.0248452	0.965447	0.866728	0.0179908	0	0.915406	230625	0	0
679610	cg14894368	chr19	50869332	+	0.880925	0.863435	0.01749	0.0286036	0.00159344	0.931264	0.772184	0.0411443	0.915733	0.659478	0.0478458	0	0.915406	242271	0	0
457160	cg20031656	chr11	125366267	+	0.0210618	0.0286137	-0.00755194	-0.313973	0.00159392	0.0468703	0.00738381	0.00819448	0.0774859	0.0104879	0.0119392	0	0.915406	205765	0	0
127285	cg06360820	chr2	242988706	-	0.834887	0.932037	-0.0971504	-0.157026	0.0015942	0.985695	0.487799	0.16356	0.985181	0.586032	0.0850126	0	0.915406	45593	0	0
483055	cg20795685	chr12	92872642	+	0.155098	0.187314	-0.0322157	-0.257168	0.00159689	0.335708	0.0625373	0.0743437	0.527316	0.0670775	0.0875742	0	0.915406	19596	0	0
558214	cg06541093	chr15	74537514	-	0.441547	0.401791	0.0397564	0.132965	0.00159749	0.591	0.280762	0.0938571	0.685456	0.226386	0.0908225	0	0.915406	59912	0	0
563048	cg07625513	chr15	89577786	+	0.428949	0.381105	0.0478434	0.166495	0.00159984	0.535693	0.324925	0.0586045	0.550243	0.234769	0.0682658	0	0.915406	40938	0	0
429134	cg14609458	chr11	32851177	+	0.0139957	0.0175129	-0.00351719	-0.197332	0.00160027	0.0258835	0.00322028	0.00512036	0.0327716	0.00871844	0.00525193	0	0.915406	359080	0	0
255231	cg00811777	chr6	31930762	+	0.719618	0.735884	-0.016266	-0.0318099	0.0016022	0.778706	0.62416	0.0423632	0.808809	0.640573	0.0382506	0	0.915406	228434	0	0
624490	cg02770857	chr17	55533254	+	0.113248	0.148221	-0.0349722	-0.360369	0.00160244	0.247232	0.0283184	0.0560786	0.393826	0.0440182	0.0710773	0	0.915406	15017	0	0
264391	cg21085915	chr6	46738981	+	0.134991	0.175613	-0.0406217	-0.356332	0.00160265	0.328137	0.0216002	0.0764261	0.577165	0.0308713	0.0992281	0	0.915406	8685	0	0
340286	cg01008010	chr8	61429760	+	0.00839858	0.0112248	-0.00282619	-0.206155	0.00160286	0.0178571	0.000783302	0.00488225	0.0413167	0.00162219	0.00670165	0	0.915406	404931	0	0
12367	cg10812684	chr1	20251013	+	0.893452	0.872366	0.0210868	0.034072	0.00160395	0.94179	0.800512	0.0343795	0.937538	0.753932	0.0401495	0	0.915406	219544	0	0
26620	cg20822884	chr1	49240625	-	0.544782	0.520792	0.0239897	0.0637736	0.00160423	0.633422	0.430325	0.0586144	0.736294	0.370284	0.0772872	0	0.915406	141836	0	0
560916	cg19708986	chr15	80824318	-	0.582983	0.545134	0.0378491	0.0951549	0.00160583	0.645787	0.516474	0.0330808	0.651291	0.448357	0.0462704	0	0.915406	94371	0	0
647764	cg26686188	chr18	56816380	-	0.958213	0.963116	-0.00490341	-0.00728794	0.0016071	0.97258	0.929937	0.0112199	0.983614	0.922673	0.0123725	0	0.915406	449617	0	0
138654	cg12688043	chr3	48129944	+	0.0145709	0.0179046	-0.00333378	-0.183557	0.00160722	0.0400491	0.00234593	0.00872616	0.0395459	0.00235278	0.00786936	0	0.915406	370340	0	0
336825	cg12441203	chr8	41121898	-	0.0170354	0.0226825	-0.0056471	-0.273669	0.00161014	0.0331385	0.00381944	0.00879888	0.0857738	0.00371284	0.0156529	0	0.915406	262059	0	0
344706	cg03331176	chr8	91659078	-	0.124076	0.157533	-0.0334575	-0.3214	0.00161025	0.278698	0.00978555	0.0595165	0.436601	0.0420818	0.081026	0	0.915406	17336	0	0
583648	cg17083819	chr16	50440214	-	0.834545	0.813149	0.0213961	0.0370209	0.00161391	0.898494	0.736127	0.0428051	0.892347	0.660008	0.0485328	0	0.915406	208927	0	0
409052	cg04923845	chr10	114575681	-	0.0115913	0.0152084	-0.00361713	-0.223457	0.00161428	0.032073	0.00117114	0.00803846	0.0358095	0.0020486	0.00700712	0	0.915406	353305	0	0
198335	cg08137646	chr4	172460054	-	0.137554	0.181007	-0.043453	-0.372383	0.00161486	0.26638	0.0455244	0.0638867	0.566024	0.055058	0.0942502	0	0.915406	6660	0	0
596809	cg06283848	chr16	87500295	+	0.932033	0.941211	-0.00917809	-0.0139879	0.0016164	0.967916	0.890489	0.021285	0.985846	0.88468	0.0222627	0	0.915406	345012	0	0
510952	cg21986196	chr13	98654970	-	0.952913	0.962289	-0.00937537	-0.0139788	0.00161906	0.978073	0.922506	0.0147023	0.98134	0.911015	0.0162432	0	0.915406	345115	0	0
162433	cg18741908	chr3	169756818	+	0.102197	0.132678	-0.0304812	-0.346732	0.00162085	0.278267	0.00746739	0.0613745	0.384365	0.0297813	0.0769645	0	0.915406	23193	0	0
160366	cg12335906	chr3	155572320	+	0.0160633	0.0189346	-0.00287133	-0.150778	0.00162574	0.0296572	0.00766524	0.00491538	0.0305726	0.00732606	0.00576053	0	0.915406	401619	0	0
472715	cg08603359	chr12	50374871	-	0.959085	0.965018	-0.00593288	-0.00880546	0.0016259	0.977959	0.933546	0.0113171	0.982402	0.925424	0.0107892	0	0.915406	418692	0	0
682720	cg14121414	chr19	55988071	+	0.0123621	0.0148096	-0.00244749	-0.149842	0.00162976	0.0295601	0.00591802	0.00450676	0.0233125	0.00522901	0.00403575	0	0.915406	434386	0	0
324979	cg20705893	chr7	157869970	+	0.707267	0.666435	0.0408323	0.0845596	0.00163028	0.847421	0.542985	0.0742972	0.825167	0.325014	0.0991258	0	0.915406	107953	0	0
173930	cg12064069	chr4	4389509	+	0.0141306	0.0162244	-0.00209382	-0.120047	0.00163034	0.0243469	0.00622514	0.00457739	0.0245373	0.00788449	0.00386405	0	0.915406	465284	0	0
30402	cg02283366	chr1	63785544	+	0.0560843	0.0677768	-0.0116925	-0.235032	0.00163177	0.130486	0.026395	0.0216123	0.182098	0.0259411	0.0305362	0	0.915406	129726	0	0
540101	cg12511021	chr14	103157425	-	0.29438	0.339483	-0.0451023	-0.199346	0.0016335	0.52259	0.0741147	0.110049	0.72121	0.122157	0.123374	0	0.915406	28658	0	0
167202	cg22005677	chr3	188374040	+	0.941835	0.950155	-0.00831987	-0.0125556	0.00163368	0.967964	0.917502	0.0107705	0.973877	0.91029	0.0136767	0	0.915406	361822	0	0
398893	cg14852063	chr10	76887360	+	0.06725	0.0778743	-0.0106243	-0.185907	0.00163565	0.196554	0.0229819	0.0428513	0.28342	0.0271524	0.0467047	0	0.915406	145300	0	0
143341	cg24727944	chr3	58318406	-	0.0111638	0.0133662	-0.00220245	-0.142828	0.00163575	0.0198852	0.00369611	0.00470903	0.0253207	0.00465479	0.00481537	0	0.915406	455375	0	0
533770	cg05304806	chr14	89030280	-	0.125321	0.15954	-0.0342188	-0.325237	0.00163577	0.228321	0.0262712	0.0424571	0.250367	0.0938095	0.0409655	0	0.915406	16128	0	0
214640	cg23249562	chr5	68826794	-	0.117317	0.166375	-0.0490583	-0.470223	0.00163578	0.268552	0.0219436	0.0682497	0.568244	0.0475499	0.096927	0	0.915406	4078	0	0
60711	cg09139451	chr1	211499945	+	0.0128411	0.0160019	-0.00316081	-0.186986	0.00163706	0.0289664	0.00516358	0.00633089	0.0281266	0.00454024	0.0055781	0	0.915406	381433	0	0
110808	cg24226308	chr2	182480167	-	0.973877	0.979453	-0.00557617	-0.00815346	0.00164228	0.99113	0.943724	0.0100174	0.99654	0.959287	0.00887448	0	0.915406	431281	0	0
727584	cg26475948	chr22	46895349	+	0.0289288	0.0373556	-0.00842678	-0.282696	0.00164316	0.0545641	0.0108164	0.0130112	0.0797119	0.0119323	0.0169949	0	0.915406	185495	0	0
30986	cg24550010	chr1	65731107	+	0.0956687	0.111998	-0.0163288	-0.207304	0.00164498	0.202386	0.0377691	0.0361511	0.250669	0.0398066	0.0546169	0	0.915406	82501	0	0
314084	cg11666629	chr7	117824024	+	0.00987203	0.0137628	-0.00389072	-0.257963	0.00164574	0.0180775	0.00246882	0.00426013	0.0272369	0.00252582	0.00610871	0	0.915406	338291	0	0
39774	cg23933345	chr1	114447334	+	0.00648483	0.0078602	-0.00137537	-0.115609	0.00164807	0.0126003	0.00126927	0.00299589	0.0223967	0.00186751	0.00448036	0	0.915406	540585	0	0
99318	cg20964377	chr2	119731815	+	0.175449	0.231879	-0.0564297	-0.383261	0.00164961	0.370956	0.0758716	0.0654607	0.474348	0.0824733	0.0890559	0	0.915406	3237	0	0
362210	cg07905847	chr9	33474331	-	0.0244834	0.0351137	-0.0106303	-0.387665	0.00165053	0.064499	0.00915829	0.0107599	0.153539	0.013838	0.0226522	0	0.915406	145203	0	0
273784	cg20916535	chr6	117592262	+	0.0841675	0.106505	-0.0223371	-0.307086	0.00165059	0.19246	0.0381518	0.0326031	0.222898	0.0511231	0.0418219	0	0.915406	48091	0	0
125865	cg13857354	chr2	241519705	+	0.143718	0.184728	-0.0410099	-0.341174	0.00165138	0.354681	0.032543	0.0987325	0.465963	0.0526046	0.090447	0	0.915406	8385	0	0
309777	cg03637179	chr7	99716580	+	0.0237261	0.0309921	-0.00726602	-0.281481	0.00165397	0.0591408	0.00908715	0.011962	0.0518121	0.0115564	0.0120627	0	0.915406	213040	0	0
368523	cg07449645	chr9	99540324	+	0.00442485	0.00519048	-0.000765637	-0.0746119	0.00165471	0.0101358	0.000531018	0.00273245	0.0130339	0.000494409	0.00276638	0	0.915406	618809	0	0
633521	cg18240703	chr17	77093866	-	0.298554	0.236231	0.0623223	0.325507	0.0016549	0.611486	0.11784	0.125953	0.549539	0.0758642	0.107307	0	0.915406	6516	0	0
670286	cg25468802	chr19	36484832	-	0.843147	0.810225	0.032922	0.0567746	0.00165767	0.921026	0.718284	0.0511842	0.900297	0.644443	0.0557265	0	0.915406	156079	0	0
445788	cg00411372	chr11	76028679	+	0.912343	0.923746	-0.0114033	-0.0177272	0.00165829	0.938961	0.869575	0.0178189	0.962729	0.870584	0.0203332	0	0.915406	309186	0	0
495626	cg04569082	chr12	127940323	-	0.0531352	0.0742244	-0.0210892	-0.415794	0.00166031	0.134461	0.0216793	0.0247099	0.396973	0.0241452	0.0618397	0	0.915406	53806	0	0
727324	cg23159233	chr22	46571660	+	0.913392	0.899755	0.0136374	0.0214658	0.00166066	0.963461	0.814305	0.0363768	0.950001	0.759917	0.0446594	0	0.915406	281263	0	0
175754	cg18085176	chr4	7939940	+	0.283287	0.357037	-0.0737503	-0.323614	0.00166608	0.43429	0.128611	0.0663014	0.862278	0.131597	0.150413	0	0.915406	6657	0	0
522412	cg13277939	chr14	39735211	+	0.15328	0.187534	-0.0342541	-0.274755	0.00166612	0.332337	0.0529795	0.0850177	0.577747	0.0513525	0.0973179	0	0.915406	16078	0	0
278753	cg15785898	chr6	144608500	-	0.12604	0.160641	-0.0346011	-0.326935	0.00166673	0.281873	0.0477186	0.0649305	0.500507	0.0363288	0.0847918	0	0.915406	15534	0	0
683306	cg11472930	chr19	56988147	+	0.0254343	0.0370035	-0.0115692	-0.407623	0.00166704	0.0726304	0.00585506	0.0154308	0.082126	0.0091436	0.0172408	0	0.915406	131459	0	0
167898	cg17198994	chr3	192129276	-	0.8206	0.782408	0.0381915	0.0679096	0.0016682	0.905749	0.725232	0.0431917	0.868595	0.64639	0.0570715	0	0.915406	134226	0	0
465524	cg23224405	chr12	12715060	+	0.0156995	0.0190973	-0.00339777	-0.179144	0.00167071	0.0272667	0.00455892	0.00542451	0.030985	0.00529846	0.00566595	0	0.915406	366432	0	0
109658	cg17104824	chr2	177014959	-	0.381437	0.309863	0.0715743	0.291327	0.00167218	0.596164	0.145518	0.121963	0.605069	0.10946	0.119429	0	0.915406	9778	0	0
607862	cg25887315	chr17	12847066	-	0.81818	0.772234	0.0459458	0.0823438	0.00167255	0.914409	0.638254	0.0688635	0.888189	0.612657	0.0763469	0	0.915406	111182	0	0
655258	cg10022788	chr19	3136019	+	0.0533602	0.0624175	-0.00905731	-0.192762	0.00167258	0.18426	0.00765923	0.0404159	0.17489	0.0217332	0.0356032	0	0.915406	172639	0	0
21486	cg05749969	chr1	38412711	+	0.0807832	0.10083	-0.0200471	-0.287854	0.0016755	0.184432	0.0272083	0.035125	0.292275	0.0358807	0.0496348	0	0.915406	59174	0	0
204925	cg01250006	chr5	5063651	-	0.606445	0.582877	0.0235684	0.0562404	0.00167575	0.751752	0.420745	0.0781722	0.739552	0.380219	0.0910482	0	0.915406	157220	0	0
233987	cg00778525	chr5	158770074	+	0.188256	0.229883	-0.0416266	-0.274964	0.00167776	0.402958	0.074225	0.102265	0.673944	0.0560443	0.118192	0	0.915406	11909	0	0
317684	cg10872050	chr7	135303322	-	0.973818	0.976676	-0.00285819	-0.00418524	0.00168111	0.99071	0.956714	0.00807456	0.99728	0.951701	0.0102545	0	0.915406	536682	0	0
631467	cg03365569	chr17	74507970	-	0.0425688	0.0703808	-0.027812	-0.612645	0.00168134	0.0977237	0.0144219	0.020059	0.247251	0.0227015	0.0489119	0	0.915406	29520	0	0
47325	cg16279948	chr1	158801084	-	0.101799	0.140682	-0.0388831	-0.430602	0.00168278	0.239672	0.0378268	0.0628506	0.443773	0.0284229	0.0826099	0	0.915406	10287	0	0
464577	cg24288319	chr12	9271139	+	0.114094	0.145594	-0.0315004	-0.326357	0.00168401	0.268525	0.0387161	0.0652689	0.450339	0.0270214	0.0804174	0	0.915406	21018	0	0
153608	cg24289380	chr3	127207185	-	0.895746	0.921904	-0.0261578	-0.0410744	0.00168428	0.944128	0.81408	0.0365532	0.956379	0.816703	0.0283561	0	0.915406	196007	0	0
429749	cg00127788	chr11	34486306	-	0.0778111	0.0945591	-0.016748	-0.251844	0.00168518	0.187773	0.0208144	0.0441158	0.233863	0.0271904	0.0468352	0	0.915406	79366	0	0
574017	cg24791105	chr16	5932353	+	0.925845	0.950021	-0.0241766	-0.0367972	0.00168544	0.965098	0.701217	0.0548024	0.979096	0.909406	0.0152786	0	0.915406	209721	0	0
366394	cg13786031	chr9	91424986	+	0.733778	0.67012	0.063658	0.129083	0.00168572	0.85011	0.593509	0.068538	0.874247	0.327981	0.0976721	0	0.915406	62667	0	0
578324	cg12182988	chr16	23224459	-	0.908315	0.879428	0.0288868	0.0461109	0.00168673	0.943318	0.862061	0.020367	0.951785	0.537807	0.0833213	0	0.915406	181739	0	0
203307	cg06626102	chr5	1346156	-	0.688793	0.652835	0.0359575	0.0762144	0.0016868	0.863324	0.483378	0.0913286	0.806277	0.417216	0.0882972	0	0.915406	120412	0	0
183175	cg05503412	chr4	57843540	-	0.0187708	0.0227545	-0.00398373	-0.187089	0.00168696	0.0379395	0.0083965	0.00769053	0.042126	0.00621645	0.00834986	0	0.915406	333442	0	0
86028	cg24125287	chr2	55460177	-	0.00624042	0.00996571	-0.00372529	-0.297935	0.00168837	0.0182695	2.81364e-06	0.0061695	0.0314773	6.60458e-05	0.00919517	0	0.915406	347237	0	0
189013	cg26396815	chr4	102878132	-	0.927276	0.936531	-0.00925506	-0.0141759	0.00169043	0.958039	0.878345	0.0226423	0.974999	0.875271	0.0253024	0	0.915406	342971	0	0
116415	cg02785650	chr2	216139628	+	0.969175	0.973832	-0.00465672	-0.00684484	0.00169055	0.983823	0.949146	0.00890455	0.990242	0.946356	0.00848458	0	0.915406	459776	0	0
150425	cg00028135	chr3	114343673	+	0.837702	0.790093	0.0476097	0.0833908	0.00169181	0.925795	0.69445	0.0577448	0.919244	0.435051	0.0925265	0	0.915406	109646	0	0
534953	cg14548192	chr14	92335675	-	0.959427	0.966336	-0.00690877	-0.0102451	0.00169208	0.973679	0.942302	0.00807898	0.98083	0.946283	0.00867608	0	0.915406	394164	0	0
204402	cg21999939	chr5	2755004	+	0.023415	0.0326252	-0.00921029	-0.351214	0.00169215	0.0791408	0.00959986	0.0146521	0.140914	0.00732033	0.0240054	0	0.915406	169748	0	0
40586	cg01034094	chr1	117101030	+	0.0924655	0.137602	-0.0451369	-0.526578	0.00169274	0.243275	0.0185059	0.0539566	0.433022	0.0396419	0.0800424	0	0.915406	5717	0	0
398962	cg08997904	chr10	77032999	-	0.696178	0.646906	0.049272	0.104345	0.00169371	0.815152	0.550069	0.0713082	0.822263	0.304256	0.0967392	0	0.915406	84107	0	0
628865	cg14406157	chr17	71064722	+	0.19261	0.231223	-0.0386124	-0.251658	0.00169466	0.423149	0.0539851	0.0940377	0.615875	0.0546008	0.109378	0	0.915406	15686	0	0
587760	cg20023898	chr16	67048469	+	0.114988	0.132895	-0.0179066	-0.193162	0.00169676	0.22923	0.0675318	0.0436551	0.266232	0.0486738	0.0535632	0	0.915406	71563	0	0
573017	cg26608663	chr16	4007772	-	0.832761	0.891676	-0.0589153	-0.0974861	0.00169694	0.946704	0.627637	0.0924645	0.95032	0.75061	0.054372	0	0.915406	91639	0	0
689467	cg20017214	chr20	19998613	-	0.0132899	0.0173546	-0.00406477	-0.232083	0.001698	0.024112	0.00590728	0.00449121	0.0472855	0.00539343	0.00862318	0	0.915406	329224	0	0
495806	cg25821072	chr12	129252706	-	0.56825	0.525505	0.0427449	0.110793	0.00169813	0.763407	0.449539	0.0827824	0.773809	0.23144	0.122846	0	0.915406	77702	0	0
56102	cg00301795	chr1	200195818	+	0.00574104	0.00785645	-0.00211541	-0.181914	0.00169856	0.0136212	0.000657107	0.00366434	0.024802	0.00104571	0.00495067	0	0.915406	463312	0	0
218921	cg03220633	chr5	92957400	+	0.0261638	0.0318706	-0.00570688	-0.211394	0.00170123	0.0660211	0.0073039	0.0158064	0.0648322	0.0060795	0.0157154	0	0.915406	259966	0	0
405094	cg19122901	chr10	101293790	-	0.0222766	0.0260179	-0.00374131	-0.158226	0.00170201	0.0741746	0.0067827	0.013939	0.0642279	0.0105544	0.0135088	0	0.915406	346347	0	0
490673	cg18800161	chr12	116971933	-	0.0473248	0.0556696	-0.00834478	-0.196066	0.00170296	0.0826904	0.0245785	0.0138288	0.0885312	0.0319193	0.0129882	0	0.915406	187330	0	0
164984	cg00832703	chr3	183254601	+	0.945814	0.952023	-0.00620869	-0.00934101	0.00170319	0.974304	0.894483	0.021794	0.987416	0.914991	0.0171516	0	0.915406	409084	0	0
614670	cg21625552	chr17	35754787	+	0.0239377	0.0325081	-0.0085704	-0.324849	0.00170355	0.0379422	0.0126314	0.00712697	0.0556047	0.0128741	0.0112136	0	0.915406	182420	0	0
132473	cg12323574	chr3	23097631	+	0.0187284	0.0226394	-0.00391103	-0.184138	0.0017074	0.0351327	0.00413961	0.00845299	0.0533072	0.00282138	0.0117092	0	0.915406	337195	0	0
95014	cg27524361	chr2	99736378	-	0.693295	0.651233	0.0420618	0.0889707	0.00171093	0.830681	0.541199	0.0972362	0.826646	0.43271	0.0908418	0	0.915406	102071	0	0
79649	cg23058548	chr2	27798745	-	0.816758	0.770623	0.046135	0.0828391	0.00171115	0.908889	0.670038	0.0531772	0.877591	0.366043	0.0947334	0	0.915406	110449	0	0
714677	cg15571262	chr22	18551368	-	0.866629	0.852705	0.0139232	0.0230977	0.00171194	0.933048	0.792968	0.0391521	0.919772	0.748599	0.0369744	0	0.915406	271171	0	0
561977	cg15137408	chr15	85191982	+	0.134892	0.175095	-0.0402033	-0.353291	0.0017122	0.315611	0.0410497	0.0738515	0.512881	0.041468	0.0959905	0	0.915406	9028	0	0
131801	cg01336231	chr3	16523047	-	0.0126412	0.0167726	-0.00413143	-0.241808	0.00171242	0.0266883	0.00285614	0.00646792	0.0348212	0.00221661	0.00752401	0	0.915406	325883	0	0
139753	cg11903404	chr3	49590665	-	0.0752811	0.0933214	-0.0180403	-0.276842	0.00171373	0.220808	0.0143605	0.046283	0.302297	0.0164611	0.0556225	0	0.915406	70658	0	0
318073	cg04229315	chr7	137647868	+	0.932057	0.944335	-0.0122777	-0.018681	0.00171615	0.973047	0.846167	0.0277606	0.988399	0.890985	0.0233753	0	0.915406	301439	0	0
689499	cg16691087	chr20	20036684	+	0.644885	0.595777	0.049108	0.112455	0.00171679	0.819347	0.478016	0.0917547	0.857067	0.374104	0.111316	0	0.915406	76162	0	0
682272	cg08166750	chr19	55598443	-	0.0246868	0.0329559	-0.00826906	-0.308468	0.00171682	0.0557398	0.0143961	0.00852657	0.0936001	0.0166625	0.0142524	0	0.915406	189047	0	0
134116	cg11308114	chr3	32821930	+	0.971442	0.977788	-0.00634656	-0.00929925	0.00171742	0.987656	0.945291	0.0109451	0.990464	0.967112	0.00672708	0	0.915406	409804	0	0
116999	cg19675223	chr2	217560272	-	0.0571341	0.0765909	-0.0194568	-0.36717	0.00172273	0.119477	0.0242091	0.0196213	0.162865	0.0303294	0.0302306	0	0.915406	62344	0	0
480073	cg03166163	chr12	69752837	-	0.934345	0.947901	-0.0135553	-0.0205615	0.00172331	0.966708	0.831394	0.0302786	0.979882	0.89896	0.0173813	0	0.915406	287366	0	0
116487	cg11309217	chr2	216299448	-	0.912271	0.939006	-0.0267352	-0.0412267	0.00172994	0.964307	0.779006	0.049803	0.985545	0.855152	0.0284154	0	0.915406	195528	0	0
277578	cg16364191	chr6	138745647	-	0.867856	0.881425	-0.0135687	-0.0221286	0.00173197	0.906062	0.840745	0.0189994	0.933942	0.825452	0.0260599	0	0.915406	277027	0	0
549542	cg00525772	chr15	46007468	+	0.900554	0.930302	-0.0297477	-0.0463791	0.00173357	0.964059	0.719752	0.0646393	0.980538	0.76894	0.0381508	0	0.915406	181008	0	0
76139	cg19623054	chr2	16085728	+	0.691105	0.769415	-0.0783092	-0.15276	0.00173562	0.857415	0.464019	0.104989	0.916265	0.485059	0.114559	0	0.915406	47775	0	0
377319	cg11289645	chr9	134527184	+	0.0483381	0.0746776	-0.0263395	-0.537542	0.00173619	0.12935	0.00641094	0.0269278	0.159727	0.0184499	0.0358299	0	0.915406	33761	0	0
412076	cg17366015	chr10	124759024	+	0.140735	0.191165	-0.0504302	-0.416367	0.00173648	0.272529	0.0466364	0.0582974	0.475912	0.0683576	0.0872721	0	0.915406	3644	0	0
585683	cg17432321	chr16	57186148	-	0.0736353	0.0837184	-0.010083	-0.164219	0.00173651	0.272157	0.00919528	0.0532687	0.256852	0.0168308	0.0478939	0	0.915406	154068	0	0
591849	cg13515047	chr16	75298429	+	0.542969	0.51189	0.0310792	0.0834535	0.0017398	0.63326	0.457751	0.0519081	0.665895	0.341937	0.0846787	0	0.915406	109555	0	0
715366	cg24164157	chr22	19929710	-	0.0254705	0.0335177	-0.00804712	-0.29498	0.00174137	0.0471101	0.00395951	0.0109861	0.0990361	0.0122078	0.0178406	0	0.915406	194049	0	0
55811	cg11813810	chr1	198621680	-	0.892649	0.864717	0.0279322	0.0453491	0.00174155	0.960209	0.755583	0.0547474	0.957424	0.629695	0.0622339	0	0.915406	183832	0	0
320702	cg05285244	chr7	149412760	-	0.667629	0.604672	0.0629579	0.140681	0.00174616	0.76592	0.554742	0.0669738	0.850802	0.447618	0.0958444	0	0.915406	54829	0	0
318049	cg13656809	chr7	137584214	+	0.0310097	0.0403391	-0.00932937	-0.295713	0.00174739	0.065199	0.00425945	0.0166391	0.0867133	0.0168087	0.0194777	0	0.915406	167470	0	0
548434	cg25287175	chr15	43133909	+	0.978497	0.971527	0.00697044	0.0102093	0.00174941	0.989503	0.963789	0.00734198	0.991419	0.925644	0.0115763	0	0.915406	394708	0	0
633795	cg22163972	chr17	77537086	+	0.914943	0.872935	0.042008	0.0670573	0.00175015	0.97067	0.808961	0.0424733	0.957792	0.642211	0.0755403	0	0.915406	135765	0	0
635362	cg16315742	chr17	79008857	-	0.00896668	0.0110741	-0.00210739	-0.152002	0.0017506	0.0190946	0.00177654	0.00430955	0.0254101	0.000826617	0.00532353	0	0.915406	464069	0	0
38939	cg26491574	chr1	111889146	-	0.0312946	0.0371995	-0.00590488	-0.192818	0.00175795	0.0614344	0.00975706	0.0112903	0.0545809	0.00540955	0.0106235	0	0.915406	253189	0	0
724175	cg19734135	chr22	40895164	-	0.95985	0.968754	-0.00890367	-0.0131842	0.00176036	0.982761	0.91328	0.0172091	0.985003	0.942838	0.0103629	0	0.915406	354299	0	0
563585	cg07136888	chr15	90358131	+	0.0160286	0.0202241	-0.00419554	-0.215604	0.00176097	0.0339534	0.00170004	0.00768518	0.0582476	3.8847e-05	0.0103351	0	0.915406	322605	0	0
486624	cg12916632	chr12	107273455	+	0.894113	0.904941	-0.0108284	-0.0171762	0.00176125	0.947378	0.806457	0.0337819	0.962196	0.833693	0.0340959	0	0.915406	313904	0	0
657409	cg00279453	chr19	5526463	-	0.160076	0.12017	0.0399053	0.385775	0.00176285	0.460619	0.0472402	0.10558	0.275408	0.0254229	0.0544349	0	0.915406	9270	0	0
302193	cg15380598	chr7	52017943	-	0.388651	0.277317	0.111334	0.472484	0.00176349	0.693127	0.0997987	0.148081	0.798902	0.071171	0.159004	0	0.915406	1358	0	0
158033	cg18361948	chr3	142803105	-	0.922951	0.936399	-0.0134482	-0.0206475	0.00176386	0.945695	0.884215	0.0175691	0.979037	0.887123	0.0171039	0	0.915406	286764	0	0
22266	cg10214754	chr1	40190384	-	0.748864	0.687665	0.061199	0.121307	0.00176434	0.90538	0.516287	0.0953707	0.857179	0.354123	0.111458	0	0.915406	68641	0	0
575586	cg12321040	chr16	11862854	+	0.150709	0.181644	-0.0309349	-0.253977	0.00176537	0.346257	0.0281985	0.0852447	0.447487	0.0508141	0.083266	0	0.915406	22174	0	0
349644	cg06988133	chr8	119100641	+	0.0938048	0.112395	-0.0185903	-0.237672	0.00176575	0.228526	0.0225043	0.0518943	0.330531	0.0260105	0.0561889	0	0.915406	67310	0	0
134993	cg06505529	chr3	37934586	-	0.0346182	0.0478631	-0.0132449	-0.375011	0.00177003	0.075019	0.00546909	0.0194855	0.177894	0.0133067	0.0297147	0	0.915406	110810	0	0
697012	cg18055765	chr20	44516452	-	0.902527	0.914071	-0.0115435	-0.0181357	0.00177106	0.938918	0.858239	0.0179016	0.956655	0.875082	0.019896	0	0.915406	305799	0	0
382356	cg08853123	chr10	1014588	-	0.714993	0.669346	0.0456472	0.093821	0.00177178	0.812436	0.533605	0.0712524	0.814089	0.490152	0.0923973	0	0.915406	95937	0	0
102950	cg08017142	chr2	136862706	-	0.17511	0.218777	-0.0436675	-0.305563	0.00177264	0.374613	0.0581852	0.0876409	0.631293	0.0612731	0.107521	0	0.915406	8257	0	0
372587	cg13400592	chr9	123917493	-	0.926554	0.944736	-0.018182	-0.0277397	0.00177609	0.969943	0.856024	0.0273394	0.978821	0.865102	0.0252901	0	0.915406	246305	0	0
493412	cg12315900	chr12	122884585	-	0.130236	0.160969	-0.0307332	-0.285881	0.00177861	0.302985	0.0418591	0.0731035	0.443344	0.0342214	0.0835039	0	0.915406	22629	0	0
144797	cg06722212	chr3	66119580	-	0.825892	0.791424	0.0344685	0.0607517	0.001781	0.920202	0.715692	0.0519285	0.887237	0.552866	0.0737444	0	0.915406	147897	0	0
379810	cg14136168	chr9	139129886	+	0.115058	0.14466	-0.0296021	-0.306503	0.00178115	0.267022	0.0120066	0.0601055	0.449855	0.0231912	0.0765429	0	0.915406	25059	0	0
390360	cg17687448	chr10	31504121	-	0.181258	0.226205	-0.0449474	-0.304522	0.00178233	0.349293	0.0496654	0.0812555	0.63521	0.0643462	0.107731	0	0.915406	8369	0	0
244125	cg22836400	chr6	10415636	+	0.07083	0.0922744	-0.0214444	-0.339482	0.00178745	0.134677	0.0148472	0.027939	0.409768	0.0346598	0.05917	0	0.915406	52089	0	0
364001	cg23871411	chr9	71567366	-	0.0810358	0.105968	-0.0249326	-0.349226	0.00178991	0.212204	0.0184767	0.0541442	0.312569	0.0220359	0.0596315	0	0.915406	38296	0	0
54247	cg27177158	chr1	184121585	-	0.0364021	0.0417945	-0.0053924	-0.158609	0.00179011	0.084239	0.01481	0.0176895	0.0970129	0.018274	0.0200661	0	0.915406	271358	0	0
388951	cg06763909	chr10	25306365	+	0.0185387	0.0215176	-0.00297891	-0.143239	0.00179066	0.0314597	0.0127717	0.00417939	0.0302963	0.0144865	0.00445334	0	0.915406	393921	0	0
162961	cg20088216	chr3	171585963	-	0.192954	0.232219	-0.0392651	-0.25516	0.00179134	0.390255	0.0388429	0.0796781	0.560294	0.0731543	0.0968505	0	0.915406	15012	0	0
76807	cg07257706	chr2	19911445	+	0.826207	0.763373	0.0628336	0.112695	0.00179241	0.957323	0.574656	0.0865926	0.923904	0.567187	0.0915535	0	0.915406	75942	0	0
530095	cg16696021	chr14	73358910	-	0.0200548	0.0243916	-0.00433675	-0.194459	0.00179242	0.0385937	0.0110389	0.00668434	0.0464861	0.00946864	0.00753502	0	0.915406	315873	0	0
209097	cg22236939	chr5	35230698	-	0.0218978	0.0289589	-0.00706101	-0.288492	0.00179567	0.0419729	0.00863275	0.00838528	0.0623366	0.00415225	0.012374	0	0.915406	218505	0	0
545456	cg12054707	chr15	34492380	+	0.911882	0.931473	-0.0195911	-0.0303378	0.00179573	0.943483	0.870332	0.0235373	0.977657	0.81025	0.0284201	0	0.915406	234563	0	0
58534	cg13401823	chr1	204910715	+	0.577683	0.514401	0.0632822	0.164368	0.00179599	0.802249	0.397308	0.114658	0.743163	0.217142	0.108022	0	0.915406	41939	0	0
629740	cg23832237	chr17	72667208	-	0.244267	0.306827	-0.0625601	-0.317351	0.001796	0.350425	0.136561	0.0652425	0.60707	0.151714	0.10209	0	0.915406	7165	0	0
534443	cg23397030	chr14	91111400	+	0.117267	0.158365	-0.0410981	-0.403735	0.0017962	0.270702	0.0250716	0.068527	0.563941	0.0241718	0.0989176	0	0.915406	8291	0	0
647286	cg25585899	chr18	55405050	+	0.180459	0.22739	-0.0469318	-0.317784	0.00179818	0.371185	0.0822411	0.0823611	0.582244	0.0682477	0.102709	0	0.915406	7130	0	0
484785	cg14195216	chr12	99548950	-	0.119776	0.159244	-0.0394677	-0.383078	0.00179936	0.215543	0.049334	0.0405776	0.340436	0.0837256	0.0545222	0	0.915406	9686	0	0
547614	cg00751156	chr15	41522898	-	0.0323853	0.0403472	-0.00796187	-0.248346	0.00180109	0.0522834	0.0161306	0.0106538	0.071157	0.0187094	0.0149586	0	0.915406	196047	0	0
237349	cg26565974	chr5	173846716	+	0.0133664	0.015803	-0.00243665	-0.143106	0.00180161	0.0329729	0.00197699	0.00688385	0.0302473	0.0023258	0.00625899	0	0.915406	435281	0	0
169791	cg03020605	chr3	196594661	-	0.0330746	0.0399713	-0.00689668	-0.214262	0.00180171	0.0493261	0.0086711	0.00938784	0.0775844	0.0140112	0.0128618	0	0.915406	222982	0	0
199020	cg10382689	chr4	176987015	-	0.0228091	0.030382	-0.00757294	-0.299618	0.00180237	0.0675542	0.00515932	0.0154549	0.130238	0.00851826	0.0228645	0	0.915406	205243	0	0
180554	cg21151541	chr4	40633269	-	0.942063	0.957399	-0.0153359	-0.0230538	0.00180246	0.984887	0.889272	0.0200229	0.979069	0.9261	0.0136375	0	0.915406	271450	0	0
558555	cg01359532	chr15	75045126	+	0.715901	0.690582	0.0253191	0.051219	0.00180298	0.838015	0.581758	0.0800843	0.827472	0.50438	0.0690752	0	0.915406	168653	0	0
51164	cg06363798	chr1	171604882	+	0.942498	0.935268	0.00723018	0.0109929	0.00180566	0.970688	0.906117	0.0177309	0.972526	0.867044	0.021301	0	0.915406	382841	0	0
246551	cg03204139	chr6	18263241	-	0.0221893	0.0301623	-0.00797299	-0.31926	0.001806	0.0551873	0.0056517	0.012517	0.0618271	0.00928798	0.0122925	0	0.915406	195792	0	0
523645	cg19695822	chr14	51710280	-	0.904339	0.913879	-0.00953916	-0.0149734	0.00180885	0.94251	0.850637	0.0238167	0.977657	0.752605	0.036929	0	0.915406	334688	0	0
561462	cg26565719	chr15	83298692	-	0.894094	0.882059	0.0120355	0.0193345	0.00180984	0.941623	0.835996	0.0282392	0.923098	0.824875	0.0238322	0	0.915406	296418	0	0
661726	cg18235573	chr19	12163984	+	0.0102391	0.0134773	-0.0032382	-0.214122	0.00181148	0.0218075	0.00401458	0.00499884	0.0284121	0.00248996	0.00622832	0	0.915406	376398	0	0
535184	cg02268192	chr14	92981666	-	0.138477	0.189352	-0.0508752	-0.425081	0.00181153	0.291477	0.0382213	0.064135	0.585708	0.0341422	0.103956	0	0.915406	3506	0	0
227351	cg11905589	chr5	138677334	-	0.00679572	0.00804828	-0.00125255	-0.103767	0.00181174	0.0219015	0.000143922	0.0058349	0.0240843	0.00017199	0.00562015	0	0.915406	555099	0	0
702230	cg26265624	chr20	58629939	-	0.230615	0.289442	-0.0588264	-0.315547	0.00181193	0.462896	0.0658337	0.111361	0.679805	0.0644999	0.124306	0	0.915406	7336	0	0
623992	cg14252586	chr17	53795504	-	0.811653	0.774845	0.0368074	0.0661204	0.00181337	0.914659	0.480529	0.0876469	0.873985	0.471043	0.0799869	0	0.915406	137455	0	0
681485	cg05337743	chr19	54369571	+	0.0166401	0.0211648	-0.00452472	-0.226319	0.00181615	0.0287303	0.00066762	0.00723981	0.0399261	0.0102575	0.00674863	0	0.915406	307176	0	0
232426	cg27128761	chr5	151055650	+	0.441953	0.432623	0.00932988	0.030094	0.00181647	0.582406	0.295947	0.0691236	0.697388	0.292078	0.0874216	0	0.915406	235588	0	0
178851	cg23206644	chr4	26143878	+	0.420937	0.406194	0.0147424	0.0502187	0.00181833	0.528798	0.303804	0.059293	0.579449	0.254529	0.0823349	0	0.915406	171075	0	0
570229	cg06810647	chr16	1665094	+	0.119728	0.143851	-0.0241233	-0.246047	0.00181993	0.302681	0.0297931	0.0634343	0.344973	0.0355869	0.0746888	0	0.915406	41166	0	0
210151	cg21489565	chr5	39723183	-	0.893404	0.907246	-0.0138425	-0.0219382	0.00182017	0.960025	0.827708	0.0365891	0.980255	0.725737	0.0454784	0	0.915406	278228	0	0
268053	cg04107099	chr6	80657826	+	0.325658	0.262783	0.0628749	0.299238	0.00182126	0.568692	0.132357	0.135573	0.548367	0.11814	0.123656	0	0.915406	8922	0	0
42457	cg07843065	chr1	150265600	+	0.946765	0.953897	-0.00713103	-0.0107129	0.00182281	0.965466	0.90747	0.0130887	0.989804	0.907048	0.0147815	0	0.915406	387029	0	0
185628	cg25689838	chr4	79480967	+	0.947028	0.953262	-0.00623384	-0.00936688	0.00182307	0.978335	0.922661	0.0125994	0.9925	0.899731	0.0213146	0	0.915406	408645	0	0
589980	cg16948509	chr16	70380640	-	0.00781381	0.00986547	-0.00205167	-0.157268	0.00182332	0.0241894	0.000261201	0.00489995	0.0232718	0.000815398	0.00539788	0	0.915406	469234	0	0
66159	cg03765770	chr1	230438854	+	0.956371	0.965118	-0.0087465	-0.0129989	0.00182479	0.981164	0.928128	0.0127951	0.97987	0.934165	0.00990346	0	0.915406	356444	0	0
631654	cg25699034	chr17	74721824	+	0.11662	0.14937	-0.0327504	-0.331879	0.00182577	0.29443	0.0433055	0.0624163	0.365237	0.0563321	0.0656271	0	0.915406	18599	0	0
27758	cg01869657	chr1	53704480	+	0.163695	0.118158	0.0455371	0.438634	0.0018261	0.407738	0.0633202	0.0886384	0.49098	0.0249024	0.081201	0	0.915406	5527	0	0
61748	cg11762244	chr1	214632083	-	0.863421	0.833195	0.0302261	0.050811	0.0018261	0.931626	0.773663	0.0423704	0.899943	0.703551	0.0491197	0	0.915406	169642	0	0
71653	cg21147613	chr2	1285398	+	0.795525	0.765207	0.0303177	0.0553472	0.00182856	0.883109	0.700767	0.0453176	0.884722	0.380998	0.0952143	0	0.915406	159144	0	0
339471	cg08359236	chr8	56793447	-	0.0768801	0.101773	-0.0248928	-0.363473	0.00183083	0.216262	0.0189469	0.0479971	0.368489	0.0167503	0.0654061	0	0.915406	38429	0	0
516321	cg00767058	chr13	114103796	+	0.839315	0.804835	0.0344801	0.059792	0.00183278	0.905856	0.698017	0.0490368	0.909582	0.520299	0.0913232	0	0.915406	149825	0	0
163153	cg24599434	chr3	172166242	-	0.0718728	0.0998088	-0.027936	-0.423537	0.00183613	0.103147	0.0451202	0.0160156	0.270713	0.0415496	0.0577267	0	0.915406	29189	0	0
565551	cg03793678	chr15	96862225	+	0.606562	0.53558	0.0709818	0.176455	0.00183745	0.767934	0.187234	0.109865	0.721566	0.329474	0.0962069	0	0.915406	36727	0	0
358170	cg01651710	chr8	145577079	-	0.837683	0.809985	0.0276981	0.0479275	0.00183892	0.903846	0.681632	0.0430525	0.892238	0.60226	0.0728302	0	0.915406	176882	0	0
306766	cg26365742	chr7	87503866	-	0.0424132	0.0551289	-0.0127158	-0.313369	0.00183988	0.0898336	0.0153321	0.0175799	0.11413	0.0218396	0.0200188	0	0.915406	116813	0	0
519007	cg23142396	chr14	23772183	+	0.0161372	0.0206311	-0.00449393	-0.228894	0.00184214	0.0345023	0.000826902	0.00827018	0.0362865	0.00755022	0.00815123	0	0.915406	308608	0	0
270670	cg20232986	chr6	100915767	+	0.068782	0.0727624	-0.00398044	-0.0711101	0.00184254	0.15415	0.0269241	0.0331851	0.153838	0.0415517	0.0245347	0	0.915406	333605	0	0
144824	cg06555256	chr3	66405978	+	0.902302	0.91091	-0.00860845	-0.0135494	0.00184269	0.96282	0.781942	0.0463297	0.984539	0.742291	0.0468639	0	0.915406	350036	0	0
311208	cg24164865	chr7	101705309	-	0.253601	0.236213	0.0173876	0.0984465	0.00184394	0.390724	0.117957	0.0679577	0.610709	0.0787478	0.107079	0	0.915406	90486	0	0
372708	cg18676053	chr9	124133094	+	0.69968	0.663468	0.0362119	0.0755591	0.00184772	0.830423	0.531683	0.066172	0.817338	0.456839	0.08531	0	0.915406	121431	0	0
62939	cg03349435	chr1	221340612	+	0.0503553	0.0665156	-0.0161603	-0.342274	0.00184995	0.13384	0.00605028	0.0302728	0.231398	0.0171219	0.0401069	0	0.915406	83866	0	0
553069	cg13694151	chr15	62072752	+	0.77201	0.807368	-0.0353581	-0.0637988	0.0018502	0.883928	0.547867	0.0681374	0.887101	0.680908	0.04666	0	0.915406	141801	0	0
435581	cg18369257	chr11	61520258	-	0.0115587	0.0162648	-0.00470608	-0.284859	0.00185084	0.0278214	0.0031623	0.00594004	0.0346896	0.00792431	0.00615039	0	0.915406	299070	0	0
376176	cg25989624	chr9	132199563	+	0.0680223	0.0976557	-0.0296334	-0.464466	0.00185085	0.194299	0.0120766	0.0419607	0.30903	0.0192309	0.0544377	0	0.915406	24993	0	0
134981	cg05997793	chr3	37901338	+	0.753702	0.735279	0.0184231	0.0352293	0.00185155	0.81798	0.680022	0.0345005	0.852604	0.657377	0.0430978	0	0.915406	215295	0	0
675911	cg26838636	chr19	46088450	+	0.0219446	0.0264488	-0.0045042	-0.190299	0.00185167	0.0383817	0.0102371	0.00658107	0.0389316	0.00933158	0.00610791	0	0.915406	308086	0	0
93213	cg19410791	chr2	87037000	-	0.56073	0.520931	0.0397989	0.104284	0.00185356	0.76597	0.321677	0.106972	0.647018	0.220471	0.0861093	0	0.915406	84173	0	0
446009	cg03571342	chr11	76495175	-	0.016359	0.0207533	-0.00439427	-0.222444	0.00185621	0.0335182	0.00351033	0.00695476	0.0359355	0.00556965	0.00770004	0	0.915406	313211	0	0
727456	cg26704651	chr22	46731182	-	0.0335088	0.0434455	-0.00993669	-0.296761	0.00185659	0.0678284	0.0115945	0.0147868	0.141043	0.0105772	0.0249892	0	0.915406	156592	0	0
77825	cg10599693	chr2	24300242	+	0.0156842	0.0204936	-0.00480945	-0.247628	0.00185787	0.0250439	0.00189668	0.00605409	0.0417131	0.008391	0.00698299	0	0.915406	294606	0	0
526712	cg26726097	chr14	62390395	+	0.0433056	0.0496691	-0.00636348	-0.162696	0.0018585	0.0905928	0.0175508	0.0190543	0.125535	0.0183726	0.0226403	0	0.915406	238314	0	0
572688	cg25416829	chr16	3564569	-	0.937173	0.945376	-0.00820329	-0.0124411	0.00186206	0.971931	0.907974	0.0118356	0.964797	0.919786	0.0115667	0	0.915406	363251	0	0
209393	cg14453864	chr5	36648779	-	0.946379	0.950538	-0.00415891	-0.0062601	0.00186215	0.977604	0.913335	0.0166101	0.9823	0.906483	0.0192044	0	0.915406	474015	0	0
12718	cg25108841	chr1	20959920	+	0.0166582	0.0184853	-0.00182713	-0.0956399	0.00186228	0.0307017	0.00645001	0.0066574	0.0326708	0.00830915	0.0061031	0	0.915406	491531	0	0
475783	cg02965391	chr12	54857032	+	0.179789	0.230886	-0.0510973	-0.343956	0.00186236	0.391887	0.0578596	0.0852939	0.711206	0.051273	0.124944	0	0.915406	5156	0	0
546045	cg13342684	chr15	37324866	+	0.960797	0.955504	0.00529291	0.00788727	0.00186283	0.979262	0.927014	0.0144446	0.974998	0.92129	0.0127044	0	0.915406	436752	0	0
615837	cg08284496	chr17	37894027	-	0.506696	0.468473	0.0382222	0.110876	0.00186347	0.685896	0.370344	0.069449	0.635134	0.300821	0.0765801	0	0.915406	77618	0	0
339255	cg05101496	chr8	55382605	-	0.0266924	0.0328752	-0.00618283	-0.224663	0.00186504	0.0665515	0.010907	0.013347	0.067376	0.00715583	0.0150177	0	0.915406	244145	0	0
641663	cg07368401	chr18	14178603	-	0.406292	0.346872	0.05942	0.222189	0.00186529	0.672617	0.200407	0.114692	0.610821	0.263689	0.066219	0	0.915406	22153	0	0
284143	cg07253384	chr6	166877002	-	0.122404	0.148511	-0.0261062	-0.259628	0.00186634	0.32148	0.0212808	0.0740391	0.407639	0.0350306	0.078953	0	0.915406	34527	0	0
221113	cg04522604	chr5	111093927	+	0.0378393	0.0465418	-0.00870251	-0.241122	0.0018665	0.057448	0.0229256	0.0104562	0.0886821	0.0192405	0.0160818	0	0.915406	179688	0	0
319216	cg26792762	chr7	140898562	-	0.842243	0.812132	0.0301109	0.0518946	0.00187182	0.898732	0.71288	0.0509571	0.908574	0.627978	0.0659883	0	0.915406	166977	0	0
184381	cg15567016	chr4	74174284	-	0.0567051	0.0768083	-0.0201033	-0.380038	0.00187201	0.117104	0.025871	0.0264764	0.252741	0.0224729	0.0399693	0	0.915406	58872	0	0
514817	cg07861790	chr13	112761844	+	0.530244	0.584193	-0.0539492	-0.137321	0.00187276	0.765611	0.3131	0.0898896	0.871938	0.450275	0.093602	0	0.915406	56975	0	0
112806	cg03379664	chr2	197877514	-	0.905519	0.916561	-0.0110423	-0.0172967	0.00187446	0.954538	0.794403	0.0345738	0.973117	0.830257	0.041264	0	0.915406	312886	0	0
689400	cg04558528	chr20	19884273	-	0.0700481	0.095175	-0.0251269	-0.393852	0.00187629	0.15871	0.0077231	0.036972	0.379276	0.0250401	0.0614598	0	0.915406	37639	0	0
607273	cg15664943	chr17	9874188	+	0.939595	0.926056	0.0135394	0.0207181	0.00187649	0.969748	0.872723	0.0200368	0.977652	0.84465	0.0250523	0	0.915406	286266	0	0
275776	cg13491506	chr6	131979728	-	0.929277	0.944084	-0.0148065	-0.0225649	0.00187786	0.961056	0.859938	0.0261448	0.97523	0.899146	0.0175199	0	0.915406	274298	0	0
345602	cg03289761	chr8	96098361	+	0.0530492	0.0777942	-0.024745	-0.477647	0.00187903	0.120461	0.00795522	0.0344303	0.196905	0.00610574	0.0489601	0	0.915406	38945	0	0
324254	cg11227520	chr7	157332818	-	0.978092	0.971438	0.00665448	0.00974894	0.00187952	0.99657	0.963194	0.0095523	0.988713	0.923887	0.0127862	0	0.915406	402193	0	0
639572	cg23564700	chr18	5544169	+	0.0396491	0.0499789	-0.0103298	-0.272687	0.00188004	0.0775421	0.0248416	0.0111768	0.0941414	0.0252238	0.018938	0	0.915406	149929	0	0
623534	cg13192952	chr17	49315863	+	0.0610356	0.0639398	-0.00290424	-0.0578097	0.00188209	0.232763	0.0138968	0.0495267	0.181044	0.0146465	0.0374711	0	0.915406	399242	0	0
343817	cg02053630	chr8	82198387	-	0.938438	0.944554	-0.00611626	-0.00927375	0.0018831	0.963143	0.910988	0.0131891	0.97263	0.917787	0.0144562	0	0.915406	410254	0	0
504635	cg23977042	chr13	43149655	+	0.0206765	0.0230608	-0.0023843	-0.107988	0.00188353	0.0408172	0.00798731	0.00746044	0.0427637	0.00908455	0.00783839	0	0.915406	439585	0	0
67257	cg21667736	chr1	234349696	-	0.113275	0.142467	-0.0291915	-0.306612	0.0018839	0.292102	0.0122156	0.0635652	0.441579	0.0345385	0.0794035	0	0.915406	26049	0	0
363400	cg18928153	chr9	37030203	+	0.112623	0.150003	-0.0373797	-0.383867	0.00188474	0.236054	0.0338509	0.0539284	0.418817	0.046837	0.0826183	0	0.915406	11853	0	0
122384	cg00853940	chr2	234847683	+	0.152555	0.0835227	0.0690325	0.797541	0.0018858	0.785942	0.030042	0.15868	0.338622	0.0155864	0.0737714	0	0.915406	1462	0	0
579814	cg13401734	chr16	28519436	+	0.460661	0.426337	0.034324	0.109245	0.00188631	0.635613	0.333758	0.0818444	0.728628	0.317084	0.0826522	0	0.915406	79212	0	0
127030	cg07515382	chr2	242755134	+	0.264064	0.226668	0.0373957	0.211646	0.00188741	0.444526	0.144554	0.0800134	0.395687	0.119172	0.0643657	0	0.915406	24963	0	0
171788	cg20641748	chr4	1397857	-	0.134043	0.157727	-0.023684	-0.219616	0.00188913	0.374232	0.0730607	0.0620078	0.273629	0.0767666	0.0500417	0	0.915406	42723	0	0
468919	cg20349635	chr12	30960369	+	0.882051	0.850256	0.0317943	0.0523589	0.00189137	0.935303	0.77591	0.0365261	0.943718	0.719884	0.055667	0	0.915406	165867	0	0
49983	cg26792900	chr1	167074894	-	0.118051	0.154993	-0.0369427	-0.365693	0.00189355	0.24549	0.0282923	0.0627619	0.502783	0.0357608	0.0896018	0	0.915406	12385	0	0
390347	cg02689489	chr10	31423315	+	0.0903988	0.106121	-0.0157223	-0.209888	0.00189519	0.228365	0.0272594	0.0454501	0.254639	0.0434473	0.0497736	0	0.915406	87295	0	0
87919	cg21217117	chr2	65190910	+	0.846189	0.802226	0.0439628	0.0760477	0.0018975	0.923043	0.67059	0.0561588	0.932259	0.647865	0.0717723	0	0.915406	120667	0	0
254384	cg07404514	chr6	31698744	+	0.853409	0.874491	-0.0210823	-0.0348038	0.00189853	0.90206	0.783332	0.0313561	0.928445	0.779478	0.0301124	0	0.915406	216904	0	0
96572	cg22150088	chr2	105716151	-	0.923964	0.936182	-0.0122176	-0.0187502	0.00189946	0.959504	0.839801	0.0248128	0.971204	0.866078	0.0215505	0	0.915406	300887	0	0
291983	cg12999507	chr7	6424938	+	0.662443	0.616643	0.0458004	0.101769	0.00189947	0.734253	0.573887	0.0363178	0.725994	0.345709	0.0764143	0	0.915406	86869	0	0
4895	cg12904950	chr1	6052770	-	0.0172822	0.0227309	-0.00544874	-0.262695	0.00190194	0.0322204	0.00603651	0.00792131	0.0447891	0.0114134	0.00826469	0	0.915406	269283	0	0
648751	cg24195903	chr18	61420013	+	0.757823	0.711866	0.045957	0.0890428	0.00190288	0.878313	0.550221	0.0951175	0.872425	0.230759	0.122931	0	0.915406	101980	0	0
583558	cg08350047	chr16	50278722	+	0.749122	0.716718	0.0324045	0.0629371	0.00190307	0.842645	0.58783	0.0656615	0.880763	0.551305	0.0803255	0	0.915406	143458	0	0
668464	cg13977235	chr19	33172072	+	0.164793	0.21092	-0.0461266	-0.337873	0.00190365	0.353639	0.0557961	0.0852685	0.640629	0.0460845	0.114	0	0.915406	5576	0	0
269882	cg06276367	chr6	93892692	-	0.65545	0.606066	0.0493844	0.111246	0.0019044	0.806493	0.471708	0.09808	0.740234	0.410306	0.0912005	0	0.915406	77298	0	0
479415	cg12866960	chr12	66635398	-	0.228089	0.278695	-0.0506058	-0.278044	0.00190476	0.457255	0.0671235	0.103899	0.696259	0.061881	0.122767	0	0.915406	11508	0	0
508381	cg21790851	chr13	73634643	+	0.113304	0.131683	-0.018379	-0.200448	0.0019052	0.26098	0.0270133	0.0598523	0.362524	0.0425146	0.0660316	0	0.915406	68538	0	0
363187	cg06881242	chr9	36191535	+	0.00967241	0.0128329	-0.00316053	-0.214943	0.00190548	0.0181615	0.00297481	0.00363223	0.025211	0.0035477	0.00600577	0	0.915406	381456	0	0
99752	cg04102556	chr2	121030618	-	0.931884	0.940121	-0.00823665	-0.0125613	0.00190608	0.978996	0.88928	0.0241964	0.981179	0.859278	0.0262839	0	0.915406	361752	0	0
78712	cg03798217	chr2	26567396	+	0.90436	0.91698	-0.0126198	-0.0197757	0.00190914	0.94343	0.84598	0.0238931	0.959575	0.869267	0.0216695	0	0.915406	293054	0	0
117655	cg02675502	chr2	219264639	-	0.0120918	0.0159667	-0.00387483	-0.233147	0.00190929	0.0244015	0.00292553	0.00506644	0.0279225	0.00369783	0.0055079	0	0.915406	339123	0	0
608541	cg13485874	chr17	16217431	-	0.952287	0.969885	-0.0175977	-0.0261448	0.00190944	0.979463	0.791607	0.047803	0.992049	0.946402	0.00928208	0	0.915406	254213	0	0
671897	cg07180832	chr19	39466560	+	0.0838928	0.0655062	0.0183866	0.31442	0.00191114	0.354034	0.0420357	0.05741	0.122624	0.0164232	0.0234039	0	0.915406	68507	0	0
248669	cg25426208	chr6	27198646	+	0.649791	0.565161	0.0846291	0.198041	0.00191138	0.917168	0.429489	0.128424	0.890596	0.189292	0.147152	0	0.915406	29062	0	0
613155	cg18200150	chr17	30822561	-	0.64823	0.55312	0.0951098	0.225149	0.00191163	0.949736	0.283896	0.203202	0.911563	0.215384	0.209473	0	0.915406	21442	0	0
134389	cg21424270	chr3	33700962	-	0.131793	0.178608	-0.0468148	-0.411603	0.00191448	0.32412	0.0402318	0.0818107	0.582912	0.0208075	0.104335	0	0.915406	4946	0	0
166873	cg06184109	chr3	187455006	-	0.590058	0.570233	0.0198257	0.0484713	0.00191532	0.654211	0.483444	0.0529198	0.778152	0.473024	0.0669413	0	0.915406	175425	0	0
250999	cg16870358	chr6	30029139	-	0.00774931	0.00935077	-0.00160146	-0.124628	0.0019155	0.0181285	0.000703586	0.00499211	0.0234569	0.000465727	0.00525798	0	0.915406	515038	0	0
196245	cg01685883	chr4	155254497	-	0.0370693	0.0454692	-0.00839984	-0.236899	0.00191611	0.0583749	0.0212783	0.0104234	0.101784	0.0245654	0.0173744	0	0.915406	186091	0	0
705040	cg22476268	chr20	62715760	+	0.0343805	0.0429208	-0.00854024	-0.253907	0.0019166	0.105738	0.0101761	0.0224857	0.126174	0.0105509	0.0264352	0	0.915406	183034	0	0
98075	cg20891765	chr2	112670316	-	0.238475	0.280617	-0.0421417	-0.226017	0.00191742	0.472467	0.109523	0.0929072	0.661302	0.0978183	0.112352	0	0.915406	21231	0	0
475353	cg08106887	chr12	54412565	+	0.312244	0.245816	0.0664277	0.333046	0.00191776	0.522403	0.183393	0.0915585	0.440258	0.0999618	0.0731879	0	0.915406	5924	0	0
128246	cg02755111	chr3	8543471	+	0.0114243	0.0140009	-0.00257657	-0.163838	0.00192026	0.0237659	0.0040138	0.00555462	0.0384292	0.00451305	0.00754571	0	0.915406	423994	0	0
66818	cg17132963	chr1	232269788	+	0.821617	0.852429	-0.0308124	-0.0524871	0.00192059	0.890054	0.581184	0.0645562	0.922418	0.736741	0.0453146	0	0.915406	165569	0	0
15798	cg09814484	chr1	26500347	-	0.941799	0.948794	-0.00699462	-0.0105634	0.0019211	0.958454	0.908271	0.0123652	0.969965	0.922376	0.0137193	0	0.915406	389260	0	0
198963	cg18954719	chr4	176710822	+	0.931253	0.904201	0.0270517	0.0420707	0.00192479	0.956709	0.893668	0.0169132	0.950133	0.704312	0.0460336	0	0.915406	193021	0	0
100570	cg20178603	chr2	123819265	-	0.774878	0.720794	0.0540844	0.103004	0.00192869	0.910457	0.615766	0.0847978	0.845941	0.431858	0.102356	0	0.915406	85493	0	0
97092	cg22120488	chr2	107199102	-	0.0349817	0.0608282	-0.0258465	-0.654986	0.00192872	0.0996855	0.000369267	0.0249317	0.703587	0.00732131	0.111345	0	0.915406	35321	0	0
575486	cg24517604	chr16	11709855	+	0.857	0.869278	-0.0122784	-0.0202881	0.00192944	0.918365	0.78143	0.0331477	0.924114	0.788658	0.0278693	0	0.915406	289361	0	0
65059	cg21539371	chr1	228270024	+	0.0127314	0.0164968	-0.00376539	-0.221132	0.00193005	0.027928	0.0014202	0.00695668	0.0537341	0.00567877	0.00876513	0	0.915406	345055	0	0
143079	cg07879319	chr3	57678116	+	0.0126645	0.0163884	-0.00372388	-0.219469	0.00193091	0.0225138	0.00341603	0.00606735	0.0508238	0.00315306	0.00943432	0	0.915406	347305	0	0
276001	cg00852964	chr6	133035150	+	0.0571001	0.0773866	-0.0202865	-0.381097	0.00193091	0.132458	0.0188721	0.0333076	0.310803	0.0179796	0.0516465	0	0.915406	57915	0	0
569361	cg06534673	chr16	1210311	+	0.732603	0.800235	-0.0676315	-0.125748	0.00193102	0.881373	0.47765	0.0978134	0.901398	0.694458	0.0563541	0	0.915406	65190	0	0
282539	cg01113468	chr6	160114232	+	0.0104772	0.0149521	-0.00447499	-0.285149	0.00193335	0.0194112	0.00440735	0.00437976	0.0337183	0.00414695	0.00730018	0	0.915406	309473	0	0
683919	cg24167603	chr19	58193144	+	0.0195298	0.0235024	-0.00397258	-0.182092	0.00193344	0.0436644	0.00474604	0.00979644	0.0460396	0.00845269	0.0085156	0	0.915406	333994	0	0
485824	cg21858255	chr12	104609609	-	0.0313084	0.0363288	-0.00502048	-0.165477	0.00193353	0.0463576	0.0172204	0.00739879	0.0674704	0.0179707	0.0094712	0	0.915406	285968	0	0
254950	cg10497484	chr6	31852976	-	0.934148	0.940684	-0.00653544	-0.009952	0.00193769	0.957835	0.90718	0.0131245	0.983159	0.858382	0.0217857	0	0.915406	398755	0	0
59300	cg11166312	chr1	206654246	+	0.969773	0.965175	0.00459728	0.00678534	0.00193885	0.985213	0.957399	0.00730912	0.977754	0.949319	0.00756315	0	0.915406	461195	0	0
164578	cg22548011	chr3	181839434	+	0.655897	0.584199	0.0716975	0.164352	0.0019399	0.930201	0.311856	0.154176	0.904228	0.391606	0.123366	0	0.915406	41945	0	0
689099	cg14303939	chr20	18448061	+	0.0133256	0.0170393	-0.00371369	-0.213142	0.00194201	0.0219904	0.00469423	0.00435008	0.0294	0.00613429	0.00551296	0	0.915406	347853	0	0
667569	cg02383074	chr19	28457378	+	0.208361	0.257728	-0.049367	-0.294053	0.00194249	0.314647	0.0520212	0.0617802	0.529553	0.113679	0.0903285	0	0.915406	9469	0	0
700221	cg00456683	chr20	53674276	+	0.827319	0.795704	0.0316157	0.0555286	0.001944	0.885307	0.705209	0.0428378	0.886173	0.568527	0.075794	0	0.915406	158783	0	0
402644	cg24228709	chr10	93786890	+	0.847283	0.87334	-0.026057	-0.0431973	0.00194876	0.906835	0.760955	0.0390172	0.934862	0.817074	0.0288723	0	0.915406	189754	0	0
666208	cg17969123	chr19	18745971	+	0.395716	0.366956	0.0287605	0.106076	0.00195052	0.508015	0.267191	0.0732015	0.459703	0.281998	0.0508463	0	0.915406	82289	0	0
389824	cg20986366	chr10	29586729	-	0.789905	0.766385	0.0235194	0.0430553	0.00195824	0.863478	0.661386	0.0564019	0.869532	0.543179	0.0800619	0	0.915406	190154	0	0
335557	cg10280702	chr8	37076738	+	0.949228	0.938363	0.0108644	0.0164335	0.00195987	0.97041	0.921921	0.0130612	0.963702	0.904818	0.014336	0	0.915406	320542	0	0
571114	cg00769818	chr16	2227872	+	0.951012	0.940655	0.0103565	0.0156318	0.00196077	0.972009	0.927245	0.0111791	0.967695	0.883138	0.0176303	0	0.915406	328143	0	0
439715	cg23003398	chr11	66045918	+	0.0123257	0.015377	-0.00305131	-0.184817	0.001961	0.0230732	0.00234383	0.00617757	0.030158	3.8847e-05	0.00809724	0	0.915406	388824	0	0
339739	cg04558094	chr8	57895175	+	0.917225	0.925209	-0.00798394	-0.0123693	0.00196279	0.963889	0.859766	0.0287532	0.965892	0.844765	0.0298064	0	0.915406	364158	0	0
459619	cg24442033	chr11	133892924	+	0.951356	0.961352	-0.00999634	-0.0149239	0.00196354	0.979423	0.833325	0.0279366	0.987735	0.912879	0.0170513	0	0.915406	335196	0	0
529287	cg09998189	chr14	70348104	+	0.229841	0.179305	0.0505355	0.341362	0.00196602	0.490644	0.0987384	0.0891673	0.35273	0.0795376	0.0591731	0	0.915406	5332	0	0
291668	cg22447539	chr7	5633086	+	0.0211442	0.0248795	-0.00373526	-0.163414	0.00196655	0.0579822	0.0011878	0.0124105	0.055433	0.00645843	0.00988604	0	0.915406	346680	0	0
634425	cg14890343	chr17	78161178	-	0.767924	0.800077	-0.0321528	-0.0584295	0.00196666	0.842367	0.689874	0.0456835	0.862516	0.729196	0.0297215	0	0.915406	152589	0	0
682274	cg00407245	chr19	55598874	+	0.121138	0.170042	-0.0489034	-0.457242	0.00196811	0.350561	0.0441953	0.0721538	0.386073	0.0438571	0.0873817	0	0.915406	4133	0	0
462692	cg24286453	chr12	5833064	-	0.739299	0.705372	0.0339274	0.0668486	0.00196831	0.830635	0.585068	0.0669652	0.834759	0.546385	0.0761512	0	0.915406	136117	0	0
515196	cg25479097	chr13	113305704	-	0.900462	0.910956	-0.010494	-0.0165335	0.00196856	0.934489	0.823051	0.0298509	0.961137	0.838955	0.0308957	0	0.915406	319616	0	0
537187	cg16889875	chr14	97584592	-	0.688055	0.641299	0.0467562	0.100021	0.00196873	0.822838	0.521614	0.090071	0.803191	0.498548	0.0789817	0	0.915406	88713	0	0
704163	cg08589418	chr20	61993913	-	0.655323	0.609442	0.0458809	0.103085	0.00196991	0.781711	0.427215	0.094803	0.793899	0.366132	0.0849704	0	0.915406	85395	0	0
377603	cg11085070	chr9	135257817	+	0.0493362	0.0640423	-0.0147061	-0.319436	0.00197258	0.15349	0.00398365	0.0312767	0.173389	0.013405	0.0336409	0	0.915406	96110	0	0
280606	cg04306225	chr6	152636953	+	0.930309	0.944048	-0.0137394	-0.0209276	0.00197611	0.954122	0.894117	0.0162403	0.985129	0.898751	0.0186519	0	0.915406	284793	0	0
423604	cg10224250	chr11	8717586	+	0.855031	0.869127	-0.0140967	-0.0233209	0.00197677	0.920509	0.751848	0.0440057	0.942846	0.704759	0.0531989	0	0.915406	269787	0	0
679501	cg06553312	chr19	50706723	+	0.125332	0.167566	-0.0422341	-0.391852	0.00198025	0.298551	0.0419868	0.0550469	0.35442	0.0580224	0.0727861	0	0.915406	7411	0	0
264232	cg04006554	chr6	46138530	+	0.00849708	0.0111839	-0.0026868	-0.195669	0.00198155	0.0145113	0.00253678	0.00349335	0.0186267	0.00192493	0.00410736	0	0.915406	415371	0	0
230350	cg12659228	chr5	145562416	-	0.00971664	0.0122609	-0.00254422	-0.175096	0.00198295	0.0193929	0.00562691	0.00322426	0.0219295	0.00448947	0.00495809	0	0.915406	426592	0	0
407569	cg11317637	chr10	105523755	+	0.00804054	0.00919973	-0.00115919	-0.0898437	0.00198326	0.0152392	0.00279515	0.00347564	0.0149097	0.0033	0.00314201	0	0.915406	566632	0	0
99535	cg24330542	chr2	120301651	-	0.0425997	0.0558619	-0.0132622	-0.32439	0.00198355	0.0882983	0.0112675	0.0169754	0.123831	0.0124105	0.0239992	0	0.915406	110614	0	0
105916	cg21319458	chr2	160472940	-	0.100809	0.121088	-0.0202794	-0.242466	0.00198459	0.266633	0.0337839	0.0602325	0.314189	0.0169177	0.0673417	0	0.915406	57954	0	0
168928	cg15662654	chr3	194843063	-	0.970708	0.963523	0.00718564	0.0106095	0.00198595	0.988533	0.949354	0.0092418	0.982548	0.943129	0.00923301	0	0.915406	388578	0	0
697277	cg15262090	chr20	44800859	+	0.68547	0.64246	0.0430091	0.0920968	0.00198709	0.813985	0.50785	0.0849213	0.819161	0.314369	0.107637	0	0.915406	98076	0	0
255318	cg17166950	chr6	31940240	-	0.00881222	0.0106457	-0.00183352	-0.134174	0.00198718	0.0140553	0.00531336	0.00233683	0.0221303	0.00322147	0.00373679	0	0.915406	490916	0	0
201035	cg16177556	chr4	186876457	-	0.927109	0.914953	0.0121564	0.0188375	0.00198757	0.961592	0.883828	0.0189041	0.942733	0.810747	0.0232869	0	0.915406	300217	0	0
374910	cg03004953	chr9	130428222	-	0.973173	0.979247	-0.00607379	-0.00888517	0.00198855	0.985771	0.957206	0.00805073	0.994425	0.966921	0.00695281	0	0.915406	417175	0	0
92373	cg01132949	chr2	85503831	+	0.839923	0.857091	-0.0171678	-0.0288509	0.0019939	0.923639	0.760151	0.0341652	0.941244	0.809394	0.0298757	0	0.915406	241128	0	0
624005	cg15945287	chr17	53809462	-	0.306238	0.262219	0.0440194	0.216245	0.00199482	0.415675	0.181662	0.0599884	0.421096	0.0919002	0.0755457	0	0.915406	23696	0	0
234851	cg06003656	chr5	166405676	-	0.0929611	0.110449	-0.0174881	-0.226326	0.00199506	0.265566	0.0411199	0.0484069	0.264654	0.0364368	0.0560226	0	0.915406	74257	0	0
660892	cg15240990	chr19	10959157	+	0.0255388	0.0317036	-0.0061647	-0.230773	0.00199517	0.0605451	0.00519489	0.0132636	0.0843418	0.00320475	0.0180263	0	0.915406	244720	0	0
405897	cg22279692	chr10	102777898	-	0.521547	0.454608	0.0669391	0.194184	0.00199621	0.783501	0.25559	0.122048	0.748711	0.247246	0.107808	0	0.915406	30278	0	0
308663	cg25277707	chr7	97736046	-	0.012857	0.0155866	-0.0027296	-0.162752	0.00199791	0.0240904	0.00333256	0.00539983	0.0279756	0.00508691	0.00510282	0	0.915406	412112	0	0
272968	cg24073442	chr6	112362292	+	0.45845	0.424093	0.0343565	0.109889	0.00200049	0.561234	0.316755	0.0695341	0.632521	0.245389	0.09721	0	0.915406	78589	0	0
482500	cg27365701	chr12	89744150	+	0.12336	0.14977	-0.0264103	-0.260673	0.00200072	0.311856	0.0356521	0.0774153	0.379017	0.0489548	0.0773133	0	0.915406	33558	0	0
436566	cg03438692	chr11	62622991	+	0.00905023	0.0140778	-0.00502756	-0.337895	0.00200089	0.0387057	9.84375e-06	0.00836153	0.0342177	0.000260384	0.00896305	0	0.915406	285669	0	0
451045	cg08400968	chr11	109817094	+	0.0152689	0.0182943	-0.00302548	-0.163153	0.00200251	0.0253402	0.00576176	0.00578958	0.0336352	0.00682971	0.00577252	0	0.915406	390669	0	0
467792	cg13134916	chr12	25707564	+	0.13836	0.183571	-0.045211	-0.383762	0.0020031	0.296822	0.039322	0.0710964	0.583905	0.0328702	0.101308	0	0.915406	5682	0	0
394099	cg23584332	chr10	54068462	+	0.0236964	0.0276135	-0.00391714	-0.158658	0.00200875	0.049681	0.00937885	0.00931916	0.0455053	0.013282	0.00739398	0	0.915406	336881	0	0
385636	cg00500822	chr10	11287797	-	0.966975	0.958375	0.00859999	0.0127558	0.00200939	0.98235	0.949736	0.00899149	0.975597	0.917108	0.0142271	0	0.915406	359369	0	0
313170	cg11161873	chr7	112120943	+	0.943948	0.95254	-0.00859171	-0.0129354	0.0020134	0.966031	0.912235	0.0120911	0.969307	0.92933	0.0102591	0	0.915406	357232	0	0
617449	cg24525630	chr17	40202553	+	0.0145156	0.0195737	-0.00505809	-0.270614	0.00201428	0.0281293	0.00131148	0.00532216	0.0287762	0.00824922	0.00514674	0	0.915406	284460	0	0
137443	cg01595088	chr3	45460142	-	0.963213	0.968077	-0.00486365	-0.00719194	0.00201579	0.984371	0.936233	0.0131387	0.983401	0.951118	0.0090799	0	0.915406	451779	0	0
549278	cg19006841	chr15	45491101	-	0.00925598	0.0129262	-0.00367018	-0.251688	0.00201761	0.0205506	0.00127921	0.00493052	0.0308787	0.00336254	0.00631073	0	0.915406	350229	0	0
321016	cg03059073	chr7	150130708	+	0.290647	0.248592	0.0420559	0.217398	0.0020179	0.490212	0.171934	0.0801805	0.403637	0.134704	0.0723819	0	0.915406	23403	0	0
49564	cg17514495	chr1	165415040	-	0.892674	0.927675	-0.0350009	-0.0548828	0.00201835	0.96087	0.709102	0.0591639	0.962075	0.841245	0.0256001	0	0.915406	160139	0	0
608968	cg16145720	chr17	17156930	+	0.931602	0.936048	-0.00444624	-0.00679637	0.00201943	0.967154	0.864668	0.0287244	0.970868	0.835063	0.0288315	0	0.915406	460943	0	0
271248	cg10626536	chr6	106661780	-	0.937316	0.949589	-0.0122725	-0.0185701	0.00202009	0.973796	0.857583	0.0276049	0.980099	0.891517	0.0202238	0	0.915406	302355	0	0
236445	cg03646542	chr5	172076155	+	0.765743	0.741657	0.0240864	0.0455051	0.00202015	0.832543	0.658161	0.0433648	0.870447	0.6402	0.0454607	0	0.915406	183416	0	0
660080	cg24708284	chr19	10181729	-	0.889494	0.921841	-0.032347	-0.0509701	0.00202175	0.950207	0.644155	0.0685667	0.954825	0.85202	0.0236947	0	0.915406	169270	0	0
150800	cg05891765	chr3	118360440	+	0.64626	0.700666	-0.0544059	-0.114904	0.00202252	0.822772	0.404182	0.0998234	0.934898	0.298727	0.119823	0	0.915406	73988	0	0
443102	cg27112585	chr11	70378117	-	0.836318	0.808121	0.0281977	0.0488869	0.00202452	0.893897	0.688943	0.0535377	0.92251	0.579148	0.0664066	0	0.915406	174404	0	0
700300	cg19807656	chr20	54933810	-	0.0961281	0.117166	-0.0210382	-0.26091	0.00202492	0.167544	0.042809	0.0302633	0.214566	0.0298792	0.0402385	0	0.915406	54071	0	0
152405	cg20570458	chr3	124069933	-	0.687389	0.633647	0.0537418	0.115694	0.00202868	0.796038	0.462691	0.0691716	0.773438	0.314635	0.0882708	0	0.915406	73311	0	0
555686	cg26757025	chr15	68131903	+	0.0109281	0.0130899	-0.00216176	-0.141818	0.00202908	0.0239887	0.00230874	0.00562339	0.0222651	0.00242532	0.00570395	0	0.915406	458983	0	0
580956	cg07920321	chr16	30481009	-	0.113938	0.166861	-0.0529235	-0.513002	0.00202936	0.305867	0.0250197	0.0664713	0.55601	0.0314505	0.103891	0	0.915406	2991	0	0
683311	cg00502665	chr19	56988813	+	0.0400144	0.049993	-0.00997854	-0.262449	0.00202941	0.100843	0.0181613	0.0179853	0.145541	0.0175302	0.0248124	0	0.915406	155893	0	0
92478	cg16437908	chr2	85640810	-	0.159069	0.197804	-0.038735	-0.297611	0.00202988	0.381347	0.0611496	0.0791264	0.474344	0.0444658	0.0970801	0	0.915406	10423	0	0
99635	cg20026361	chr2	120584083	+	0.0340446	0.041106	-0.00706136	-0.214526	0.00203157	0.0619933	0.00819809	0.0135597	0.149425	0.0092927	0.0220893	0	0.915406	218491	0	0
576833	cg19787543	chr16	17416019	+	0.207198	0.251292	-0.0440936	-0.26665	0.00203202	0.451866	0.0684435	0.0964097	0.651012	0.0693634	0.113328	0	0.915406	13080	0	0
248465	cg15203866	chr6	26533749	-	0.00907293	0.0118777	-0.0028048	-0.197936	0.00203502	0.0236715	0.00156178	0.00565344	0.0257038	0.00113152	0.00540975	0	0.915406	406497	0	0
715351	cg12457376	chr22	19928061	-	0.965956	0.955298	0.010658	0.0158417	0.00203544	0.984324	0.941362	0.00969928	0.98591	0.888948	0.0176218	0	0.915406	326094	0	0
322913	cg08275802	chr7	155137875	-	0.00871094	0.0104328	-0.0017219	-0.127008	0.00203911	0.019724	0.00119426	0.00467914	0.0243843	0.00269405	0.00492437	0	0.915406	502224	0	0
499281	cg18363035	chr13	20805385	+	0.403738	0.374699	0.0290392	0.104988	0.00204034	0.604415	0.274317	0.0926314	0.568152	0.190902	0.0921078	0	0.915406	83390	0	0
687877	cg05232481	chr20	10534496	-	0.168459	0.202506	-0.034047	-0.251912	0.00204102	0.347051	0.0448814	0.0799148	0.572694	0.0488562	0.0981121	0	0.915406	16413	0	0
89029	cg07690783	chr2	69614456	+	0.00994724	0.011437	-0.00148979	-0.103916	0.00204247	0.018961	0.00206689	0.0049034	0.0211482	0.00154355	0.00532027	0	0.915406	527543	0	0
430940	cg21259720	chr11	43779382	+	0.927186	0.936668	-0.00948162	-0.0145226	0.00204311	0.968802	0.872827	0.0258012	0.965435	0.870793	0.0248219	0	0.915406	339285	0	0
16568	cg09766323	chr1	27648393	+	0.0142522	0.0184704	-0.00421821	-0.231347	0.00204399	0.0314327	0.00639172	0.0059522	0.0378399	0.00778574	0.0067464	0	0.915406	321499	0	0
575473	cg01267165	chr16	11681599	+	0.812753	0.788413	0.0243399	0.0433241	0.00204496	0.899804	0.729483	0.049583	0.878429	0.621934	0.0620427	0	0.915406	189375	0	0
263155	cg04528783	chr6	43408090	+	0.95081	0.956578	-0.00576769	-0.00863453	0.00204737	0.963652	0.927188	0.00839256	0.982482	0.929139	0.0116397	0	0.915406	421866	0	0
593706	cg08747377	chr16	82660670	-	0.0576005	0.0718106	-0.0142101	-0.275254	0.00204919	0.151805	0.0284247	0.0277754	0.174906	0.027404	0.0348397	0	0.915406	100791	0	0
296002	cg14649140	chr7	27214201	-	0.0322484	0.038892	-0.00664361	-0.210702	0.00205079	0.0570279	0.015177	0.00989414	0.0675371	0.0222307	0.0115064	0	0.915406	230070	0	0
68954	cg00606312	chr1	241695616	+	0.0577752	0.0676782	-0.0099031	-0.196754	0.00205129	0.140455	0.0195224	0.0309997	0.178044	0.0214217	0.0314395	0	0.915406	157117	0	0
517325	cg26164155	chr14	20937375	-	0.0281706	0.0340287	-0.00585803	-0.20598	0.00205183	0.0483655	0.00776511	0.0107139	0.1994	0.0140845	0.0298154	0	0.915406	254786	0	0
64837	cg17137740	chr1	227760805	+	0.864626	0.886139	-0.0215134	-0.0350569	0.00205292	0.903977	0.790678	0.0268942	0.937145	0.8319	0.0282645	0	0.915406	215953	0	0
607128	cg23378165	chr17	9550256	+	0.560753	0.52783	0.0329222	0.0857142	0.00205301	0.770879	0.387931	0.0896637	0.683432	0.337228	0.0855618	0	0.915406	106363	0	0
326661	cg03128011	chr8	1321333	-	0.507094	0.475507	0.0315868	0.0909339	0.00205345	0.806066	0.220323	0.149701	0.816116	0.0715059	0.170558	0	0.915406	99569	0	0
227347	cg05565298	chr5	138676950	+	0.0137635	0.0170485	-0.00328498	-0.1868	0.00205486	0.0334734	0.00454405	0.00663721	0.060668	0.00246062	0.00982811	0	0.915406	373432	0	0
38061	cg15850185	chr1	110163645	-	0.00743575	0.00838353	-0.000947783	-0.0763656	0.00205502	0.0215309	0.000493819	0.00481161	0.0182888	0.00181045	0.00386344	0	0.915406	593761	0	0
465271	cg24193254	chr12	11966359	+	0.0355835	0.0429015	-0.00731803	-0.214798	0.00205538	0.118781	0.00649894	0.0256156	0.142071	0.00632635	0.0294473	0	0.915406	211704	0	0
510472	cg08237761	chr13	95938293	+	0.136765	0.169291	-0.0325265	-0.2888	0.00205738	0.318304	0.0329377	0.0774936	0.527984	0.0382823	0.0924783	0	0.915406	19011	0	0
83759	cg10069809	chr2	45028604	+	0.265606	0.283937	-0.0183314	-0.0929016	0.00205969	0.479241	0.170808	0.0689806	0.45928	0.182044	0.0675023	0	0.915406	97085	0	0
197786	cg13087191	chr4	169104757	+	0.947257	0.957808	-0.0105512	-0.0158148	0.00205972	0.984607	0.868948	0.0285869	0.992171	0.896148	0.0232601	0	0.915406	326353	0	0
106865	cg17947058	chr2	165845417	-	0.0302496	0.0436456	-0.013396	-0.414486	0.00206065	0.074247	5.99948e-05	0.0206816	0.132109	0.00583295	0.0251608	0	0.915406	109280	0	0
684071	cg16246961	chr19	58459139	-	0.0142232	0.017161	-0.00293779	-0.165146	0.00206168	0.0230024	0.00436409	0.00445586	0.0349331	0.00806599	0.0062749	0	0.915406	396789	0	0
384080	cg14637870	chr10	5455077	-	0.012964	0.0176254	-0.0046614	-0.266621	0.0020652	0.0297272	0.000304758	0.00784686	0.042092	0.00282942	0.00918228	0	0.915406	301114	0	0
145516	cg00091098	chr3	71100993	+	0.940298	0.954175	-0.0138769	-0.0209149	0.00206692	0.96992	0.860952	0.0207713	0.990909	0.922824	0.0160664	0	0.915406	284890	0	0
354577	cg09149160	chr8	141195525	-	0.93732	0.948649	-0.0113285	-0.0171501	0.00206736	0.962568	0.885636	0.0148417	0.96911	0.91409	0.011624	0	0.915406	314148	0	0
383631	cg14370716	chr10	3803526	+	0.869917	0.84619	0.0237274	0.0394371	0.00206955	0.946105	0.797485	0.0372416	0.905532	0.728469	0.0340706	0	0.915406	201078	0	0
471160	cg20567140	chr12	48152038	+	0.179329	0.220272	-0.0409428	-0.282443	0.00207096	0.366427	0.0568827	0.0794512	0.555239	0.059714	0.101704	0	0.915406	10926	0	0
142054	cg27046466	chr3	53367462	+	0.964406	0.960125	0.00428148	0.00635307	0.0020711	0.984675	0.944026	0.0120634	0.983344	0.919308	0.0163532	0	0.915406	471670	0	0
657069	cg18115693	chr19	4968519	+	0.0570231	0.0712472	-0.0142241	-0.27766	0.00207333	0.133002	0.0270194	0.0246397	0.220333	0.0392851	0.0352821	0	0.915406	100645	0	0
112279	cg04536999	chr2	192490046	+	0.0473676	0.0629563	-0.0155887	-0.346796	0.00207337	0.0797489	0.0106795	0.0199733	0.141347	0.0216038	0.0273109	0	0.915406	88427	0	0
169574	cg00360833	chr3	196122070	-	0.970504	0.972677	-0.00217324	-0.00319413	0.00207458	0.989337	0.94862	0.011491	0.994652	0.944738	0.0104326	0	0.915406	574305	0	0
665381	cg00024989	chr19	17902242	+	0.0857814	0.114025	-0.028244	-0.372818	0.00207718	0.177075	0.0328727	0.0377135	0.268837	0.0285065	0.0559297	0	0.915406	28406	0	0
445492	cg09331409	chr11	75315116	-	0.0371522	0.0475424	-0.0103902	-0.287299	0.00207929	0.0770319	0.00530507	0.0174489	0.14171	0.0139511	0.025694	0	0.915406	148942	0	0
273595	cg25488567	chr6	116781307	+	0.847802	0.864948	-0.0171454	-0.0285516	0.00208013	0.915476	0.785309	0.0367569	0.933221	0.753071	0.0440503	0	0.915406	242517	0	0
409234	cg09659072	chr10	114939288	+	0.19082	0.236507	-0.0456866	-0.295722	0.00208027	0.389114	0.0600819	0.10831	0.725462	0.0588853	0.119976	0	0.915406	9289	0	0
158564	cg16636671	chr3	147126403	+	0.0863195	0.104159	-0.017839	-0.245139	0.00208031	0.261498	0.0233211	0.0475721	0.320604	0.0504062	0.0460634	0	0.915406	72034	0	0
445276	cg22110267	chr11	75052065	+	0.0845092	0.0937737	-0.00926451	-0.134914	0.00208144	0.271751	0.0240998	0.0545501	0.227693	0.0309941	0.0471632	0	0.915406	168708	0	0
246786	cg21458764	chr6	20212635	+	0.0112071	0.0146657	-0.00345862	-0.21796	0.00208166	0.0230273	0.0029024	0.00549895	0.0315832	0.00333903	0.00699006	0	0.915406	362635	0	0
329683	cg11465442	chr8	11832261	-	0.574958	0.531341	0.0436177	0.111797	0.00208285	0.758532	0.402466	0.09492	0.802131	0.241226	0.106558	0	0.915406	76753	0	0
644425	cg20982699	chr18	36613479	-	0.895848	0.926914	-0.031066	-0.0486477	0.0020842	0.958723	0.789734	0.0406405	0.965677	0.857305	0.0265653	0	0.915406	175021	0	0
479038	cg03958041	chr12	65283867	-	0.505431	0.457087	0.0483449	0.142091	0.00208763	0.835761	0.26864	0.118812	0.67153	0.160509	0.109833	0	0.915406	53925	0	0
464822	cg16974345	chr12	10274100	+	0.0765204	0.0932921	-0.0167718	-0.255619	0.00208921	0.181522	0.000828136	0.0469341	0.276625	0.0281478	0.0514261	0	0.915406	79206	0	0
109657	cg27160395	chr2	177014949	-	0.47066	0.371748	0.0989113	0.332394	0.00208951	0.815912	0.168975	0.17059	0.838799	0.0878332	0.147478	0	0.915406	5964	0	0
326030	cg06724674	chr8	622346	+	0.191248	0.243287	-0.0520386	-0.331796	0.00208955	0.393775	0.0475364	0.100076	0.680003	0.0309974	0.123065	0	0.915406	6019	0	0
18371	cg20410415	chr1	31769926	-	0.00906216	0.012624	-0.00356181	-0.247141	0.0020896	0.016515	3.8847e-05	0.00392448	0.0269786	0.00159378	0.00553442	0	0.915406	356503	0	0
220780	cg22603964	chr5	109024897	+	0.00800576	0.00939409	-0.00138833	-0.107159	0.00208982	0.0169641	0.00198035	0.00365022	0.0171243	0.00139454	0.00349504	0	0.915406	539152	0	0
161429	cg13619777	chr3	160144196	+	0.939848	0.952022	-0.0121748	-0.0183744	0.0020925	0.977217	0.869187	0.0264606	0.984275	0.882254	0.0199881	0	0.915406	303862	0	0
433849	cg23075364	chr11	57267445	+	0.362779	0.31224	0.0505393	0.210186	0.00209487	0.670432	0.213222	0.123095	0.664009	0.106481	0.135956	0	0.915406	25368	0	0
485196	cg23067881	chr12	102036140	+	0.299259	0.258094	0.0411656	0.20608	0.00209701	0.510224	0.124055	0.0906315	0.414395	0.128173	0.0681646	0	0.915406	26541	0	0
389400	cg06363569	chr10	27793008	+	0.0252963	0.0316158	-0.00631954	-0.237616	0.00209813	0.041161	0.0140259	0.00629702	0.0486158	0.0133949	0.00836037	0	0.915406	239722	0	0
299789	cg04442388	chr7	43151168	+	0.35441	0.312504	0.0419065	0.176248	0.00209952	0.707655	0.168345	0.142097	0.486733	0.0584139	0.114462	0	0.915406	36790	0	0
546317	cg22892489	chr15	38857738	+	0.951856	0.953705	-0.00184967	-0.00277167	0.00210036	0.966681	0.925485	0.0102199	0.983218	0.866059	0.0208258	0	0.915406	592248	0	0
294198	cg09366336	chr7	21293933	+	0.0839689	0.102333	-0.0183637	-0.257521	0.00210333	0.154911	0.0268599	0.0329306	0.218212	0.0512337	0.0332533	0	0.915406	68624	0	0
298621	cg11845241	chr7	36960377	-	0.977934	0.974277	0.00365692	0.00535016	0.00210547	0.993253	0.957974	0.00869913	0.987408	0.947039	0.0101227	0	0.915406	499164	0	0
485413	cg06652329	chr12	102874566	+	0.0581665	0.0660349	-0.00786837	-0.157598	0.0021055	0.108705	0.0150791	0.0244686	0.143212	0.0270395	0.0256608	0	0.915406	198203	0	0
536102	cg20532208	chr14	94984534	-	0.722638	0.770311	-0.0476724	-0.0909476	0.00210578	0.880732	0.420335	0.11535	0.909506	0.558313	0.0836593	0	0.915406	99549	0	0
320746	cg18989174	chr7	149470820	-	0.0105736	0.0133116	-0.00273798	-0.180253	0.00211185	0.0238127	0.00147672	0.00548443	0.0287159	0.000482917	0.00687473	0	0.915406	411471	0	0
320909	cg04642165	chr7	150063431	+	0.146011	0.179754	-0.0337423	-0.282476	0.00211223	0.295309	0.034223	0.0738545	0.564672	0.0403007	0.0905731	0	0.915406	16853	0	0
614527	cg05323725	chr17	35294713	+	0.0531018	0.0612254	-0.00812355	-0.17471	0.00211399	0.096431	0.0251973	0.0178555	0.122632	0.0238509	0.0270152	0	0.915406	192290	0	0
180517	cg23768790	chr4	40579526	-	0.110844	0.144356	-0.0335119	-0.353114	0.00211435	0.276026	0.0287945	0.0596929	0.509013	0.0327717	0.0874587	0	0.915406	17251	0	0
435058	cg18329572	chr11	60741081	+	0.883862	0.854444	0.029418	0.0482797	0.00211585	0.964099	0.754841	0.0635463	0.961616	0.523367	0.0829441	0	0.915406	175941	0	0
480221	cg07250771	chr12	70289007	-	0.963711	0.9695	-0.00578928	-0.00855226	0.00211675	0.977183	0.946319	0.00923865	0.988779	0.947159	0.00969928	0	0.915406	423406	0	0
718366	cg02384984	chr22	27950783	+	0.388959	0.361525	0.0274344	0.102783	0.00211823	0.50457	0.247404	0.0596684	0.514273	0.158122	0.0785519	0	0.915406	85740	0	0
231978	cg07283463	chr5	150051412	+	0.0170993	0.0223256	-0.00522621	-0.254417	0.0021192	0.0294147	0.00824873	0.005595	0.0803654	0.0103327	0.0119514	0	0.915406	277660	0	0
669130	cg00002559	chr19	34919659	-	0.04117	0.053636	-0.0124659	-0.314544	0.00212096	0.068869	0.00762276	0.0148313	0.127351	0.0105175	0.0190473	0	0.915406	119837	0	0
610469	cg24181274	chr17	20060107	-	0.0412837	0.051287	-0.0100033	-0.25708	0.00212253	0.0967568	0.0142986	0.0189429	0.118589	0.024298	0.0210616	0	0.915406	155448	0	0
100715	cg09961427	chr2	127457493	+	0.977336	0.982662	-0.00532573	-0.00776105	0.00212264	0.991242	0.959409	0.00599333	0.99643	0.971478	0.00547543	0	0.915406	439391	0	0
173289	cg00549851	chr4	3332582	-	0.0533886	0.085541	-0.0321523	-0.591895	0.00212381	0.150396	0.0128299	0.031734	0.354352	0.017253	0.0613345	0	0.915406	19721	0	0
71219	cg22490454	chr2	468934	+	0.176644	0.155854	0.0207901	0.170377	0.0021249	0.322247	0.0833987	0.0575043	0.382384	0.0496406	0.0838501	0	0.915406	55337	0	0
101518	cg09629105	chr2	129231058	+	0.00448977	0.00641911	-0.00192934	-0.180341	0.00212569	0.0114503	0.00099661	0.00308067	0.0276655	0.00119958	0.00478826	0	0.915406	481213	0	0
620345	cg14950344	chr17	44810162	+	0.96156	0.966272	-0.00471168	-0.00697959	0.00212723	0.978288	0.93265	0.0112051	0.978903	0.945888	0.00882264	0	0.915406	456622	0	0
103695	cg01978215	chr2	145078303	+	0.0326135	0.0473079	-0.0146944	-0.427425	0.00212888	0.062597	0.0136645	0.013706	0.103825	0.0193587	0.0184852	0	0.915406	96200	0	0
190959	cg10625542	chr4	114803890	-	0.813436	0.842779	-0.0293424	-0.0505144	0.00213595	0.870262	0.745884	0.032232	0.916121	0.74141	0.0403018	0	0.915406	170363	0	0
86077	cg16750914	chr2	55646622	-	0.0225913	0.0282383	-0.00564705	-0.230534	0.0021363	0.0637002	0.00691382	0.013588	0.0481567	0.00760871	0.0105559	0	0.915406	262060	0	0
699887	cg16180657	chr20	52167627	+	0.072325	0.103975	-0.0316502	-0.469317	0.00213648	0.169859	0.00967353	0.0404911	0.316656	0.0171997	0.0590519	0	0.915406	20710	0	0
79758	cg15129506	chr2	27958712	-	0.0392766	0.0416809	-0.00240424	-0.0687268	0.00213716	0.0761147	0.0178211	0.0158811	0.0785416	0.0121782	0.0142094	0	0.915406	437889	0	0
401314	cg00127176	chr10	88545884	+	0.929718	0.947126	-0.0174082	-0.0264813	0.00213832	0.958591	0.800966	0.0353617	0.988038	0.908516	0.0171429	0	0.915406	252536	0	0
244923	cg11195038	chr6	12638413	-	0.034567	0.043487	-0.00891999	-0.263212	0.00213928	0.0663616	0.0201038	0.0114503	0.0795907	0.0217193	0.0135186	0	0.915406	175292	0	0
361272	cg23337046	chr9	21032451	-	0.92674	0.938034	-0.0112941	-0.0172902	0.00214077	0.966845	0.839903	0.0279056	0.976541	0.906249	0.0152369	0	0.915406	312941	0	0
188958	cg25433855	chr4	102268622	+	0.0144906	0.0185267	-0.00403614	-0.220087	0.00214221	0.046611	0.00122246	0.0110426	0.0403701	0.00165746	0.00916999	0	0.915406	330702	0	0
69840	cg25721040	chr1	245525294	-	0.972623	0.943212	0.0294104	0.04384	0.00214537	0.984987	0.946908	0.0100458	0.988753	0.484504	0.111284	0	0.915406	187936	0	0
499187	cg22387578	chr13	20710941	-	0.0769441	0.133555	-0.0566108	-0.723443	0.0021457	0.173332	0.0194923	0.0416546	0.39112	0.026299	0.0939576	0	0.915406	2243	0	0
604355	cg14264910	chr17	6075558	-	0.725632	0.694999	0.0306332	0.0613634	0.00214793	0.828033	0.584539	0.0606581	0.86363	0.510807	0.0639736	0	0.915406	146595	0	0
40297	cg18942631	chr1	116311341	-	0.766591	0.739066	0.0275251	0.0520623	0.00214826	0.832138	0.636923	0.0517907	0.875416	0.640014	0.0528404	0	0.915406	166589	0	0
635582	cg23839288	chr17	79126509	+	0.114881	0.155399	-0.0405183	-0.405399	0.0021574	0.3298	0.0378427	0.0694905	0.41098	0.041127	0.0806201	0	0.915406	8756	0	0
643151	cg22494653	chr18	28786898	+	0.0717661	0.0899698	-0.0182037	-0.289989	0.00216234	0.245212	0.0153643	0.0534996	0.247919	0.0169621	0.0555327	0	0.915406	69649	0	0
206824	cg12803754	chr5	14676460	-	0.0266276	0.0434223	-0.0167947	-0.54451	0.00216824	0.0596302	0.00591865	0.0143436	0.158393	0.0094185	0.0279507	0	0.915406	79047	0	0
135383	cg23151298	chr3	38846358	+	0.855356	0.903116	-0.04776	-0.0775044	0.00217047	0.959675	0.56823	0.0912236	0.961029	0.563753	0.074557	0	0.915406	118345	0	0
542270	cg14370961	chr14	105767520	-	0.0193153	0.0245682	-0.00525296	-0.237794	0.00217059	0.0353654	0.00597724	0.00690323	0.0401652	0.00994624	0.00727515	0	0.915406	276692	0	0
70064	cg22088344	chr1	246163260	-	0.0336614	0.0443132	-0.0106517	-0.314942	0.00217283	0.0768732	0.00329129	0.0207515	0.153093	0.00806289	0.0271408	0	0.915406	144870	0	0
389024	cg24361761	chr10	25782377	+	0.621612	0.530593	0.0910182	0.224494	0.00217612	0.918083	0.235639	0.15257	0.902848	0.178432	0.157222	0	0.915406	21593	0	0
163134	cg01948066	chr3	172067735	+	0.903762	0.922281	-0.0185196	-0.0289473	0.00217926	0.948487	0.800234	0.0337082	0.958787	0.868891	0.020873	0	0.915406	240682	0	0
614461	cg05119076	chr17	35215768	+	0.975869	0.979906	-0.00403671	-0.00589516	0.00218137	0.985421	0.964146	0.00574762	0.991745	0.962009	0.00733192	0	0.915406	483818	0	0
343987	cg00153289	chr8	83356073	-	0.707618	0.771585	-0.0639672	-0.123187	0.00218391	0.853742	0.407187	0.104268	0.918165	0.511695	0.0935243	0	0.915406	67158	0	0
585388	cg00793056	chr16	56691764	+	0.0136192	0.0158909	-0.00227174	-0.132487	0.00218652	0.0246866	0.00598627	0.00457239	0.0257257	0.00627271	0.00431396	0	0.915406	449191	0	0
220138	cg11458134	chr5	102091118	+	0.0247574	0.0294316	-0.00467418	-0.182032	0.00218772	0.043552	0.00787176	0.00832903	0.0447279	0.0148511	0.00784132	0	0.915406	300500	0	0
334358	cg02152631	chr8	29133647	+	0.922637	0.942207	-0.0195699	-0.0299593	0.00218927	0.957338	0.735534	0.0424409	0.966258	0.917705	0.0120073	0	0.915406	236184	0	0
591643	cg16379316	chr16	75019367	-	0.200709	0.173225	0.0274842	0.201637	0.0021919	0.376288	0.120641	0.0672021	0.281494	0.0753026	0.0457813	0	0.915406	30415	0	0
495929	cg02531227	chr12	129460621	-	0.511107	0.574194	-0.0630872	-0.164869	0.00219329	0.755997	0.181827	0.134037	0.927936	0.262944	0.147241	0	0.915406	41702	0	0
655414	cg18180434	chr19	3309489	-	0.844948	0.815182	0.0297662	0.0511246	0.00219427	0.929281	0.553516	0.0763988	0.929814	0.582692	0.0853872	0	0.915406	168898	0	0
24732	cg10224098	chr1	44873229	-	0.0284067	0.032239	-0.0038323	-0.137218	0.00219434	0.0669088	0.0131579	0.0115059	0.0632523	0.0139639	0.0107842	0	0.915406	341366	0	0
448705	cg06116095	chr11	93861851	-	0.0059126	0.007276	-0.0013634	-0.1186	0.00219442	0.0113209	0.00151105	0.00278084	0.0111088	0.00285869	0.00258327	0	0.915406	542048	0	0
550897	cg07260590	chr15	52408234	-	0.984532	0.979989	0.00454282	0.00660504	0.00219454	0.992795	0.974324	0.00585792	0.989479	0.966721	0.00492171	0	0.915406	465520	0	0
604626	cg27146152	chr17	6659364	+	0.00320941	0.00418388	-0.000974466	-0.102686	0.00219615	0.00811321	0.000163992	0.00181663	0.0116624	0.000221456	0.0022638	0	0.915406	590217	0	0
473507	cg09934692	chr12	52211788	+	0.939241	0.94943	-0.0101895	-0.015404	0.0021971	0.954485	0.904177	0.0126886	0.974966	0.917619	0.0112287	0	0.915406	330389	0	0
37151	cg10691490	chr1	103716210	-	0.547645	0.504149	0.0434964	0.117162	0.00219835	0.788372	0.326259	0.121933	0.685052	0.293106	0.0891288	0	0.915406	72045	0	0
501034	cg04187823	chr13	27559650	-	0.0161163	0.021441	-0.00532477	-0.2677	0.00220035	0.0339266	0.00386376	0.00684864	0.0369506	0.00814175	0.00719701	0	0.915406	273880	0	0
695280	cg23936900	chr20	39657558	+	0.018462	0.0221312	-0.0036692	-0.174938	0.00220416	0.0309801	0.00688789	0.00608277	0.0331784	0.0148451	0.00438545	0	0.915406	350286	0	0
43808	cg23929269	chr1	152797129	-	0.832894	0.869348	-0.0364542	-0.0610833	0.00220426	0.909269	0.672183	0.0608723	0.963263	0.707743	0.0508942	0	0.915406	147207	0	0
302352	cg06584494	chr7	54614477	-	0.068024	0.0939197	-0.0258957	-0.413479	0.00220456	0.215943	0.0207009	0.0423252	0.503236	0.0239661	0.0837762	0	0.915406	35168	0	0
197897	cg13695498	chr4	169553032	+	0.0272392	0.0304042	-0.003165	-0.117683	0.0022086	0.0494435	0.0158814	0.0089208	0.0515391	0.0168632	0.00790981	0	0.915406	381120	0	0
658695	cg23037918	chr19	7600138	-	0.00990215	0.0126644	-0.00276223	-0.187503	0.00221041	0.0153484	0.00448218	0.00300897	0.0211492	0.00566699	0.00396982	0	0.915406	409655	0	0
409441	cg13894665	chr10	115743094	-	0.958017	0.96503	-0.00701264	-0.0104137	0.00221126	0.97799	0.947304	0.00770946	0.983636	0.945113	0.00926705	0	0.915406	391565	0	0
162956	cg08923842	chr3	171563393	+	0.860431	0.872394	-0.0119627	-0.0196925	0.00221285	0.914435	0.813824	0.0268738	0.92081	0.82428	0.0233645	0	0.915406	293644	0	0
362455	cg02411961	chr9	34523230	+	0.0123883	0.0185797	-0.00619136	-0.352243	0.0022135	0.0339601	0.00215517	0.00804677	0.0321907	0.00342515	0.0076128	0	0.915406	243869	0	0
470316	cg19814923	chr12	43727305	+	0.92069	0.932325	-0.0116352	-0.0179243	0.00221462	0.955049	0.862484	0.0233598	0.978492	0.857022	0.0252486	0	0.915406	307533	0	0
389169	cg02485174	chr10	26792038	+	0.14983	0.189132	-0.0393018	-0.317185	0.00221471	0.350527	0.0429865	0.0810876	0.627462	0.0383787	0.105515	0	0.915406	9845	0	0
58859	cg24339193	chr1	205399803	+	0.0133511	0.0192345	-0.00588342	-0.324183	0.00221492	0.0399519	0.00203531	0.00922803	0.0733591	0.00180407	0.0143421	0	0.915406	253951	0	0
46549	cg05575544	chr1	156662074	-	0.026504	0.0299723	-0.00346829	-0.130946	0.00221796	0.0790153	0.0083171	0.0179366	0.0843347	0.0078486	0.0156121	0	0.915406	362032	0	0
688097	cg06481814	chr20	11872647	+	0.0218325	0.0267293	-0.0048968	-0.206431	0.00221864	0.0448044	0.007732	0.0103175	0.0481582	0.00199688	0.0127448	0	0.915406	290884	0	0
311506	cg23570785	chr7	102576079	+	0.0883993	0.113865	-0.0254657	-0.332049	0.00221881	0.219578	0.0235191	0.0538321	0.372639	0.028818	0.0676621	0	0.915406	36472	0	0
159973	cg22678398	chr3	152884214	+	0.2056	0.252174	-0.0465738	-0.282166	0.0022194	0.297281	0.11454	0.0526653	0.393377	0.15225	0.0539681	0	0.915406	10961	0	0
623898	cg07712000	chr17	53396083	-	0.940786	0.950871	-0.010085	-0.0152221	0.00222114	0.956068	0.923893	0.0101144	0.98285	0.899074	0.0169106	0	0.915406	332208	0	0
295103	cg25270424	chr7	24965657	+	0.932232	0.942449	-0.0102171	-0.0155597	0.00222122	0.969567	0.867136	0.0319744	0.97091	0.901411	0.0191434	0	0.915406	328865	0	0
714740	cg18699242	chr22	18632429	-	0.379179	0.319073	0.0601059	0.242026	0.00222141	0.524952	0.150865	0.0982074	0.540271	0.127886	0.0970383	0	0.915406	17653	0	0
237071	cg18302639	chr5	173091319	-	0.125976	0.159506	-0.03353	-0.317983	0.00222543	0.338027	0.0179933	0.0710557	0.505536	0.0342431	0.0882739	0	0.915406	17222	0	0
499434	cg11809038	chr13	21276845	-	0.114776	0.131526	-0.0167498	-0.181724	0.00222553	0.315382	0.0216896	0.0636407	0.294326	0.0597012	0.0589307	0	0.915406	79351	0	0
714739	cg27281093	chr22	18632404	-	0.225405	0.183483	0.0419222	0.282939	0.00222811	0.387935	0.0658422	0.075423	0.412572	0.0327974	0.0790129	0	0.915406	10855	0	0
263998	cg19164246	chr6	45296161	+	0.37348	0.310857	0.0626228	0.25722	0.00223014	0.64843	0.197637	0.124623	0.749321	0.125291	0.121513	0	0.915406	14671	0	0
136909	cg16646616	chr3	44040527	-	0.0514499	0.0579812	-0.0065313	-0.145725	0.00223112	0.1117	0.0315799	0.018067	0.115265	0.030748	0.0207009	0	0.915406	233297	0	0
399559	cg17791617	chr10	79628941	+	0.922949	0.900734	0.022215	0.0347685	0.00223178	0.968845	0.850279	0.0335203	0.962076	0.805585	0.0377871	0	0.915406	217039	0	0
609109	cg24595920	chr17	17402172	+	0.905298	0.922203	-0.0169052	-0.0264029	0.00223229	0.931873	0.878179	0.0168428	0.962787	0.893453	0.0169689	0	0.915406	252898	0	0
93146	cg18109106	chr2	86850866	+	0.00950515	0.0116691	-0.00216395	-0.151784	0.00223337	0.0209002	0.0025617	0.00575333	0.0234327	0.0023375	0.00437936	0	0.915406	458787	0	0
617119	cg13227839	chr17	39822735	+	0.0131562	0.0155874	-0.00243122	-0.144036	0.00223938	0.0303797	0.00158596	0.00630139	0.0377093	0.00398305	0.00764411	0	0.915406	435754	0	0
25914	cg15933935	chr1	47082037	+	0.0532358	0.0657026	-0.0124668	-0.259602	0.00224007	0.0801074	0.0211059	0.0152834	0.147176	0.0344566	0.0231158	0	0.915406	119824	0	0
575559	cg06340200	chr16	11836643	+	0.0244925	0.0285352	-0.00404267	-0.159893	0.0022405	0.0427005	0.012811	0.007152	0.0542391	0.0135667	0.00853405	0	0.915406	330345	0	0
161298	cg07420027	chr3	159705224	-	0.700926	0.67005	0.0308763	0.0640592	0.00224065	0.76803	0.621022	0.0422433	0.800008	0.533932	0.0617463	0	0.915406	141294	0	0
189997	cg08852033	chr4	109571502	+	0.0216055	0.0279685	-0.00636295	-0.264625	0.00224249	0.0467101	0.00711659	0.0112126	0.0590818	0.00702639	0.0124059	0	0.915406	238326	0	0
371460	cg08497322	chr9	116505196	+	0.781959	0.727661	0.0542987	0.102469	0.0022428	0.878527	0.681745	0.0578674	0.897518	0.438334	0.0964172	0	0.915406	86114	0	0
37882	cg23616212	chr1	109941201	-	0.239329	0.234884	0.00444451	0.0259493	0.00224315	0.363381	0.162664	0.0489767	0.48696	0.134401	0.0757193	0	0.915406	310867	0	0
640440	cg09568451	chr18	9861970	+	0.153036	0.180851	-0.0278142	-0.22725	0.00224397	0.351374	0.0457988	0.0731052	0.415542	0.0600088	0.0795557	0	0.915406	29515	0	0
714085	cg07685786	chr21	48025691	-	0.503136	0.474792	0.028344	0.0819753	0.00224411	0.620848	0.382849	0.0624193	0.676567	0.362464	0.0732645	0	0.915406	111720	0	0
341705	cg14034993	chr8	68649702	-	0.959351	0.968668	-0.00931783	-0.0138016	0.00224414	0.978165	0.939904	0.0126249	0.98478	0.944644	0.0100408	0	0.915406	347185	0	0
604035	cg23619370	chr17	5168138	-	0.644375	0.605181	0.0391935	0.0891056	0.00224462	0.747702	0.469592	0.0684966	0.710612	0.374102	0.0754523	0	0.915406	101897	0	0
293607	cg11325152	chr7	17810471	-	0.149682	0.178528	-0.028846	-0.239576	0.0022492	0.334992	0.0252452	0.0834404	0.560281	0.0406339	0.0950161	0	0.915406	26867	0	0
114889	cg20351668	chr2	206628737	-	0.465798	0.381771	0.0840264	0.280337	0.00225116	0.728604	0.126963	0.137454	0.602027	0.0564786	0.131486	0	0.915406	11239	0	0
197742	cg20176349	chr4	168155222	-	0.0514909	0.062076	-0.0105851	-0.229146	0.002252	0.14744	0.0196403	0.0295701	0.164861	0.0289468	0.0297756	0	0.915406	145907	0	0
469486	cg16785912	chr12	33048913	+	0.0270048	0.03847	-0.0114653	-0.389382	0.00225214	0.0618637	0.00194543	0.014032	0.0781643	0.0141544	0.0167081	0	0.915406	132879	0	0
703702	cg21212389	chr20	61569206	+	0.0113198	0.014924	-0.00360422	-0.225343	0.00225216	0.0284064	0.00399767	0.00553636	0.0265342	0.00506307	0.00580929	0	0.915406	354064	0	0
518610	cg19916543	chr14	23339853	+	0.905871	0.914123	-0.00825199	-0.0129405	0.00225334	0.963873	0.837898	0.0296854	0.959892	0.86621	0.0245867	0	0.915406	357161	0	0
678212	cg10347828	chr19	49244040	-	0.535943	0.476744	0.0591986	0.165586	0.00225472	0.666808	0.34389	0.0845357	0.62703	0.212718	0.0982128	0	0.915406	41356	0	0
617656	cg02832357	chr17	40429406	+	0.0655732	0.0911028	-0.0255296	-0.419876	0.00225557	0.160767	0.0100137	0.0394487	0.307168	0.0165011	0.057156	0	0.915406	36261	0	0
428682	cg08111895	chr11	31531177	+	0.00959573	0.0130481	-0.00345238	-0.234109	0.00225576	0.0207492	0.00200669	0.00530787	0.024481	0.00585333	0.00445365	0	0.915406	363042	0	0
236630	cg22026677	chr5	172288445	-	0.935429	0.94453	-0.00910119	-0.0138217	0.00225603	0.956749	0.917231	0.00972922	0.965237	0.914794	0.0131257	0	0.915406	346931	0	0
714012	cg25539589	chr21	47877758	-	0.00954799	0.0111587	-0.00161075	-0.114233	0.00225656	0.024159	0.00215253	0.00470867	0.0216491	0.00315907	0.00450397	0	0.915406	514022	0	0
37756	cg24678938	chr1	109751226	+	0.796084	0.762781	0.0333028	0.0608703	0.00225797	0.911404	0.723059	0.0441256	0.840866	0.599337	0.0489958	0	0.915406	147647	0	0
41787	cg17326144	chr1	145608565	+	0.976162	0.971184	0.0049783	0.00730139	0.00226159	0.986618	0.964199	0.00635894	0.984972	0.953605	0.00833788	0	0.915406	449306	0	0
210645	cg02706813	chr5	42890141	-	0.418216	0.347145	0.071071	0.261829	0.00226257	0.750704	0.168838	0.142922	0.563919	0.0969896	0.128618	0	0.915406	13878	0	0
450644	cg18976159	chr11	107710989	+	0.0850871	0.120697	-0.0356104	-0.45891	0.00226373	0.234267	0.0100787	0.0546871	0.326844	0.0160253	0.0739546	0	0.915406	14091	0	0
264882	cg16470491	chr6	49998815	+	0.118197	0.150917	-0.0327194	-0.327948	0.00226589	0.209881	0.0624305	0.0387719	0.23968	0.0801995	0.0450248	0	0.915406	18650	0	0
458565	cg16006970	chr11	129872985	-	0.00958284	0.0114068	-0.00182398	-0.128481	0.00226844	0.0197092	0.0054117	0.00357509	0.0170974	0.00662803	0.00275843	0	0.915406	491867	0	0
315828	cg03119018	chr7	128712650	+	0.111826	0.141101	-0.0292759	-0.310701	0.00226858	0.243358	0.0376964	0.0587506	0.403191	0.0375375	0.0728115	0	0.915406	25875	0	0
112742	cg09358112	chr2	197583934	+	0.120119	0.149866	-0.0297467	-0.297029	0.00227024	0.301119	0.03636	0.064702	0.456881	0.0444179	0.0810804	0	0.915406	24723	0	0
225840	cg07274716	chr5	134363973	+	0.142325	0.109679	0.0326465	0.347988	0.00227024	0.319957	0.0716298	0.0669172	0.232558	0.0631974	0.0336991	0	0.915406	18770	0	0
182213	cg05172394	chr4	54233429	-	0.987721	0.983532	0.00418894	0.00606992	0.00227134	0.997439	0.964148	0.00724242	0.992876	0.960718	0.00670176	0	0.915406	479003	0	0
313712	cg22035312	chr7	116212568	+	0.929421	0.938958	-0.00953698	-0.0145724	0.00227192	0.955037	0.886147	0.0165047	0.975735	0.893744	0.0167196	0	0.915406	338806	0	0
336058	cg19500185	chr8	38035015	-	0.0104176	0.0135326	-0.00311496	-0.204845	0.00227205	0.0192401	0.00455739	0.00363881	0.0264368	0.00400855	0.0056061	0	0.915406	384527	0	0
429579	cg12403841	chr11	34128306	+	0.627978	0.679996	-0.0520184	-0.113082	0.00227327	0.719187	0.494376	0.0622856	0.777797	0.580563	0.0492305	0	0.915406	75611	0	0
563618	cg21898464	chr15	90429881	-	0.961828	0.975296	-0.0134681	-0.0198563	0.00227782	0.988421	0.932234	0.0161217	0.995815	0.944245	0.0106585	0	0.915406	292463	0	0
648932	cg14120010	chr18	63418583	-	0.0251515	0.0297739	-0.00462241	-0.178236	0.00227812	0.0537975	0.00991322	0.0123731	0.062987	0.00975325	0.0117285	0	0.915406	302790	0	0
535940	cg19511435	chr14	94595985	-	0.0144211	0.0179014	-0.0034803	-0.192209	0.00228169	0.0377157	0.00310737	0.00770816	0.037026	0.00404861	0.00796284	0	0.915406	361293	0	0
459077	cg03189990	chr11	131564914	-	0.0104212	0.014137	-0.00371583	-0.241181	0.00228236	0.0273485	0.00284919	0.00533491	0.0361619	0.00284162	0.00796464	0	0.915406	347737	0	0
87569	cg04167764	chr2	64246058	-	0.0150977	0.0168941	-0.00179643	-0.099736	0.00228256	0.0338025	0.00364363	0.00610446	0.028703	0.00712015	0.00528041	0	0.915406	494699	0	0
248629	cg05142576	chr6	27114781	-	0.00411671	0.00504564	-0.000928931	-0.0919416	0.00228526	0.0125162	0.000636375	0.00323766	0.0157561	0.00111394	0.00329594	0	0.915406	596320	0	0
32013	cg17385610	chr1	70994574	+	0.0158568	0.0196112	-0.00375434	-0.195596	0.00228818	0.0636764	0.00221902	0.0120207	0.046421	0.00857309	0.00788993	0	0.915406	345698	0	0
576151	cg00728961	chr16	14280447	-	0.949282	0.936284	0.0129981	0.0196819	0.00228968	0.980942	0.813161	0.0324601	0.975876	0.771693	0.0362235	0	0.915406	293717	0	0
302180	cg12550074	chr7	51698710	-	0.936736	0.94609	-0.00935313	-0.0141829	0.00229226	0.964824	0.905773	0.014866	0.977399	0.920529	0.0129486	0	0.915406	342903	0	0
195560	cg13152819	chr4	152682222	-	0.0107853	0.0135178	-0.00273253	-0.178192	0.0022934	0.0211332	0.00286244	0.00416838	0.0318062	0.00390446	0.00646328	0	0.915406	411907	0	0
661750	cg05668894	chr19	12176107	-	0.0352862	0.0400794	-0.00479318	-0.145145	0.002296	0.0786014	0.0121017	0.0156363	0.0792648	0.0207388	0.0155534	0	0.915406	295327	0	0
96332	cg08682760	chr2	104694659	-	0.945541	0.954117	-0.00857674	-0.0128916	0.00229687	0.962375	0.921856	0.0108555	0.97277	0.935623	0.0093129	0	0.915406	357743	0	0
384285	cg15704219	chr10	5735135	-	0.109847	0.145616	-0.035769	-0.376796	0.00229753	0.235828	0.0592457	0.0487698	0.366267	0.0625164	0.0682615	0	0.915406	13862	0	0
174009	cg17882539	chr4	4544320	+	0.0306671	0.0370445	-0.00637735	-0.210162	0.00229868	0.0517692	0.0171859	0.00865285	0.0578173	0.0221996	0.00941564	0	0.915406	237899	0	0
239664	cg26657018	chr5	178797893	+	0.923025	0.899344	0.0236811	0.0370898	0.00230062	0.964803	0.840531	0.0288158	0.953124	0.714668	0.0519938	0	0.915406	208683	0	0
20494	cg24867146	chr1	36273870	+	0.0274446	0.032458	-0.0050134	-0.181279	0.00230238	0.0510813	0.0105939	0.0099182	0.0552102	0.0151831	0.00750227	0	0.915406	286241	0	0
330687	cg08562151	chr8	18746006	+	0.755615	0.793081	-0.037466	-0.0689264	0.00230851	0.862971	0.658155	0.0592707	0.941453	0.622171	0.0626545	0	0.915406	132439	0	0
336718	cg19123390	chr8	40246414	-	0.778749	0.742912	0.0358368	0.0670846	0.00231052	0.881553	0.612866	0.0680411	0.846332	0.56106	0.0714053	0	0.915406	135712	0	0
539644	cg14718553	chr14	102438447	+	0.137972	0.179327	-0.0413555	-0.35556	0.0023107	0.256268	0.0442529	0.0588224	0.487782	0.0551771	0.0872369	0	0.915406	8093	0	0
621862	cg21616089	chr17	47089952	-	0.814752	0.785394	0.0293582	0.052291	0.00231218	0.890356	0.738299	0.0429368	0.902911	0.56555	0.0653521	0	0.915406	166018	0	0
10374	cg09749435	chr1	16330686	-	0.83598	0.787027	0.0489532	0.0859954	0.00231392	0.923203	0.652982	0.0626066	0.939381	0.445303	0.0928216	0	0.915406	106017	0	0
723556	cg19713460	chr22	39745530	+	0.101483	0.1194	-0.017917	-0.215015	0.00231526	0.313707	0.0313144	0.0594884	0.345187	0.0309122	0.0702338	0	0.915406	71496	0	0
273943	cg10374523	chr6	118620467	+	0.699231	0.659055	0.040176	0.0841308	0.00231842	0.848456	0.511448	0.102301	0.793131	0.479743	0.0821783	0	0.915406	108590	0	0
702773	cg24959147	chr20	60531577	+	0.853965	0.791435	0.0625301	0.108388	0.0023192	0.967617	0.660733	0.0789844	0.961958	0.434483	0.0923433	0	0.915406	79986	0	0
607200	cg22885891	chr17	9729337	+	0.615502	0.588359	0.0271428	0.0640026	0.00231982	0.809154	0.467611	0.106089	0.754274	0.371204	0.0966784	0	0.915406	141380	0	0
355889	cg17024115	chr8	143271209	-	0.678089	0.652087	0.0260019	0.0555742	0.00232175	0.84736	0.537992	0.080165	0.792589	0.433451	0.077076	0	0.915406	158692	0	0
715722	cg03952331	chr22	20792222	+	0.0117712	0.0147347	-0.00296351	-0.184116	0.00232212	0.0232982	0.00206334	0.00471449	0.0317197	0.0039244	0.00576391	0	0.915406	395014	0	0
285120	cg20526110	chr6	168599051	+	0.743233	0.720551	0.0226819	0.044111	0.0023242	0.82433	0.61577	0.0538142	0.8377	0.505367	0.07701	0	0.915406	187155	0	0
359989	cg15886873	chr9	6640383	-	0.872313	0.889916	-0.0176024	-0.0284989	0.00232518	0.918199	0.809983	0.0281113	0.948842	0.80987	0.0252739	0	0.915406	242752	0	0
419342	cg02030652	chr11	1412397	+	0.115865	0.170557	-0.0546918	-0.520574	0.00232537	0.251078	0.02844	0.0605426	0.353973	0.0735751	0.0740098	0	0.915406	2603	0	0
661292	cg05202804	chr19	11484815	+	0.0180065	0.0229218	-0.00491531	-0.233282	0.00232549	0.033938	0.0028174	0.00791599	0.0441653	0.00683525	0.0088024	0	0.915406	290121	0	0
443276	cg26429499	chr11	70563792	+	0.78018	0.833184	-0.0530038	-0.0936657	0.00232752	0.877236	0.449554	0.0921115	0.921684	0.773244	0.038286	0	0.915406	96138	0	0
679235	cg10166205	chr19	50316699	+	0.00937071	0.0119356	-0.0025649	-0.179398	0.00232784	0.0211171	0.000458316	0.00527236	0.0275936	0.0005298	0.00655916	0	0.915406	424912	0	0
158199	cg09373338	chr3	143695144	-	0.896291	0.912508	-0.0162169	-0.0255869	0.00232823	0.949894	0.824572	0.0338839	0.954022	0.840258	0.0267307	0	0.915406	257160	0	0
553905	cg13534750	chr15	64277933	+	0.16172	0.20768	-0.0459596	-0.342148	0.00232846	0.356021	0.048877	0.0842303	0.567815	0.0330871	0.106624	0	0.915406	5331	0	0
28033	cg25006186	chr1	54237010	+	0.96261	0.972917	-0.0103063	-0.0152072	0.00232856	0.985982	0.924863	0.0158903	0.991389	0.941892	0.0131646	0	0.915406	332324	0	0
109213	cg06585198	chr2	175701436	-	0.92804	0.940944	-0.0129039	-0.0197108	0.00232917	0.959947	0.890199	0.02124	0.97834	0.894957	0.0205683	0	0.915406	293520	0	0
309826	cg04136922	chr7	99745383	-	0.946178	0.955647	-0.00946933	-0.0142172	0.00232959	0.967981	0.821649	0.0275938	0.980276	0.887665	0.0180242	0	0.915406	342522	0	0
104238	cg03330979	chr2	149539833	-	0.141155	0.184436	-0.0432809	-0.363266	0.00233065	0.320509	0.0513041	0.0642433	0.576607	0.0626385	0.0945216	0	0.915406	6758	0	0
623146	cg14457311	chr17	48698799	-	0.757157	0.680059	0.0770986	0.152803	0.00233107	0.952263	0.566353	0.0860549	0.910007	0.274398	0.103227	0	0.915406	47739	0	0
9312	cg14027957	chr1	13930786	+	0.845607	0.792127	0.0534804	0.0931183	0.0023318	0.918652	0.732017	0.0537787	0.926427	0.515214	0.0962923	0	0.915406	96817	0	0
108543	cg13462525	chr2	173420046	+	0.752737	0.799459	-0.0467213	-0.0857711	0.00233287	0.858926	0.563089	0.0833554	0.904214	0.668284	0.0582987	0	0.915406	106288	0	0
495963	cg14750341	chr12	129691759	+	0.659471	0.699104	-0.0396333	-0.0829763	0.00233318	0.769021	0.494332	0.0639022	0.782045	0.615664	0.0414309	0	0.915406	110231	0	0
274520	cg26885821	chr6	124125002	-	0.019123	0.0212537	-0.00213071	-0.101868	0.00233489	0.0470691	0.00346637	0.00999163	0.0626708	0.000895957	0.0119532	0	0.915406	461905	0	0
577807	cg00652027	chr16	21311968	-	0.012575	0.0149435	-0.00236859	-0.143943	0.0023357	0.0372631	0.00188754	0.00806292	0.0329127	0.00327117	0.00709407	0	0.915406	440898	0	0
475566	cg09588157	chr12	54626768	+	0.96704	0.973199	-0.00615902	-0.00906586	0.00233584	0.98799	0.935885	0.0120378	0.991943	0.897496	0.0179682	0	0.915406	413875	0	0
149923	cg02405461	chr3	112740175	+	0.976074	0.973135	0.00293906	0.00430648	0.00233666	0.988078	0.953992	0.0102434	0.983796	0.948519	0.00811194	0	0.915406	532453	0	0
282699	cg11656326	chr6	160389601	+	0.123295	0.169565	-0.0462696	-0.42988	0.0023372	0.208044	0.065602	0.0362532	0.366968	0.0584246	0.0759408	0	0.915406	5178	0	0
450687	cg27084470	chr11	107878908	-	0.65204	0.62314	0.0289006	0.0643952	0.00233736	0.751841	0.553946	0.0544373	0.731321	0.330591	0.0724978	0	0.915406	140703	0	0
338430	cg13752864	chr8	49825415	+	0.792496	0.830926	-0.0384294	-0.0674836	0.00233766	0.854269	0.631787	0.0507955	0.880421	0.77905	0.026942	0	0.915406	134986	0	0
146477	cg08976322	chr3	76157345	-	0.152594	0.178581	-0.0259868	-0.213909	0.0023377	0.294838	0.0765949	0.0569224	0.263591	0.0975502	0.0408119	0	0.915406	34886	0	0
449884	cg02807563	chr11	102324080	-	0.00723332	0.0109105	-0.00367719	-0.279028	0.00233811	0.014272	0.00269934	0.00299827	0.0709326	0.00216343	0.0110362	0	0.915406	349875	0	0
78142	cg16663989	chr2	25195601	-	0.0174779	0.0210894	-0.00361151	-0.178152	0.00233837	0.0340343	0.00964743	0.00670258	0.0391997	0.0117467	0.00679186	0	0.915406	353645	0	0
342477	cg26961166	chr8	73687160	+	0.284613	0.218855	0.0657578	0.364386	0.00234139	0.794592	0.0811285	0.160559	0.506635	0.0408235	0.120563	0	0.915406	4055	0	0
205038	cg04947196	chr5	5354038	+	0.779985	0.815538	-0.0355529	-0.0635092	0.00234166	0.9252	0.577394	0.0975067	0.951919	0.66873	0.0741163	0	0.915406	142328	0	0
102380	cg24439232	chr2	134241989	-	0.800307	0.850328	-0.0500207	-0.0864177	0.00234198	0.924485	0.59041	0.0983665	0.940833	0.692885	0.0582409	0	0.915406	105467	0	0
246901	cg06512263	chr6	20709867	+	0.0949897	0.128835	-0.0338453	-0.403124	0.00234457	0.204139	0.020441	0.0497782	0.423684	0.0374876	0.0733574	0	0.915406	16701	0	0
424178	cg07197493	chr11	9884649	-	0.156793	0.203908	-0.0471148	-0.35893	0.00234554	0.373899	0.0490695	0.0874356	0.599575	0.0300312	0.109916	0	0.915406	4815	0	0
54150	cg20732296	chr1	183790936	-	0.947892	0.961108	-0.0132157	-0.0197683	0.00234572	0.979981	0.926574	0.0131551	0.980578	0.915853	0.0122417	0	0.915406	293111	0	0
714716	cg05875032	chr22	18593364	-	0.0334817	0.0400482	-0.00656651	-0.20291	0.00234729	0.0665869	0.00684619	0.0136581	0.0991193	0.0111643	0.0180884	0	0.915406	232281	0	0
168546	cg00094913	chr3	194120949	-	0.016707	0.0209684	-0.00426139	-0.213579	0.00234894	0.0370481	0.00850493	0.00701326	0.046028	0.0110649	0.00748255	0	0.915406	319472	0	0
345321	cg16775167	chr8	95229664	-	0.0736636	0.0893973	-0.0157337	-0.248607	0.00234995	0.17377	0.0328872	0.0318176	0.173442	0.041506	0.0324863	0	0.915406	87206	0	0
675155	cg05287953	chr19	45258894	-	0.963594	0.971835	-0.00824102	-0.0121603	0.0023509	0.976775	0.935251	0.0108135	0.98764	0.946094	0.00978786	0	0.915406	366840	0	0
682269	cg07608565	chr19	55595022	-	0.406988	0.494557	-0.0875699	-0.275014	0.00235478	0.6286	0.121306	0.117838	0.821488	0.193878	0.136969	0	0.915406	11903	0	0
428500	cg05646827	chr11	30218230	+	0.453087	0.533283	-0.0801959	-0.23042	0.00235485	0.623827	0.272707	0.0887181	0.779723	0.314344	0.123243	0	0.915406	20150	0	0
428480	cg08490115	chr11	30038675	+	0.0923377	0.103842	-0.0115041	-0.153693	0.00235652	0.206212	0.0232136	0.0520673	0.26174	0.0279453	0.0573238	0	0.915406	132340	0	0
238683	cg01817359	chr5	176900278	+	0.0137755	0.0171251	-0.00334962	-0.190154	0.00235852	0.0338895	0.00191778	0.00777095	0.0408492	0.00423839	0.00738512	0	0.915406	369337	0	0
495712	cg27329659	chr12	128744281	-	0.180095	0.235413	-0.0553172	-0.368486	0.00235872	0.306125	0.0575137	0.074019	0.508374	0.093725	0.104511	0	0.915406	3834	0	0
460175	cg23825768	chr12	289860	+	0.0693158	0.088506	-0.0191902	-0.312604	0.00235874	0.225441	0.0235588	0.0395941	0.273434	0.0261553	0.0474484	0	0.915406	63732	0	0
48517	cg13853198	chr1	161185092	-	0.0502156	0.06577	-0.0155543	-0.331488	0.00235915	0.150095	0.0167858	0.0304579	0.222308	0.012402	0.0406738	0	0.915406	88714	0	0
432410	cg01968525	chr11	46575582	-	0.0793125	0.0975381	-0.0182256	-0.267915	0.00236061	0.199167	0.0250126	0.0471142	0.253614	0.0236141	0.0521179	0	0.915406	69495	0	0
330855	cg08922108	chr8	19341295	-	0.852217	0.862227	-0.0100094	-0.0166517	0.00236168	0.9108	0.739784	0.0386842	0.925851	0.786947	0.0375586	0	0.915406	318534	0	0
481449	cg18829268	chr12	79257699	-	0.0617881	0.0746067	-0.0128186	-0.237028	0.00236175	0.17177	0.0300421	0.0291581	0.193582	0.0303204	0.0369527	0	0.915406	115624	0	0
370294	cg14208721	chr9	111696763	-	0.0100365	0.0137484	-0.00371189	-0.245199	0.0023628	0.0208166	0.00174959	0.00452657	0.0288449	0.00181585	0.00688733	0	0.915406	347962	0	0
500920	cg09156155	chr13	27102776	+	0.274294	0.375102	-0.100808	-0.437855	0.00236325	0.523749	0.039114	0.131831	0.793492	0.0783728	0.153961	0	0.915406	1823	0	0
332730	cg14868896	chr8	24151506	-	0.0297859	0.0403582	-0.0105724	-0.339971	0.00236452	0.0725666	0.00993932	0.0151957	0.0948398	0.0152207	0.0180606	0	0.915406	146112	0	0
601628	cg26552641	chr17	1819380	-	0.0749248	0.092574	-0.0176492	-0.272407	0.0023648	0.174191	0.0166098	0.0404307	0.291	0.0241219	0.0493123	0	0.915406	73223	0	0
173107	cg18016444	chr4	3093377	+	0.917094	0.926901	-0.00980714	-0.0151812	0.00236563	0.964891	0.809335	0.0322985	0.965879	0.748625	0.0371646	0	0.915406	332578	0	0
506931	cg18006980	chr13	51939003	+	0.5292	0.516078	0.0131219	0.0355434	0.0023662	0.667464	0.315428	0.0745021	0.816995	0.382171	0.0861221	0	0.915406	214173	0	0
37328	cg24649393	chr1	107992180	+	0.966446	0.956473	0.00997379	0.014812	0.00236814	0.988777	0.939372	0.0133953	0.980351	0.917998	0.0150202	0	0.915406	336356	0	0
160559	cg01308236	chr3	156391777	-	0.0186583	0.0223211	-0.00366279	-0.173523	0.00236957	0.0360904	0.00622825	0.00712835	0.0424127	0.00926896	0.00729956	0	0.915406	350640	0	0
538966	cg23492249	chr14	101490020	-	0.969516	0.974338	-0.00482261	-0.00708563	0.00237101	0.98173	0.94505	0.00889739	0.991903	0.952436	0.0093857	0	0.915406	454221	0	0
715664	cg05471139	chr22	20748332	-	0.0105089	0.0139735	-0.00346455	-0.225187	0.00237156	0.0221564	0.00166667	0.00505281	0.0329352	0.00203198	0.00671738	0	0.915406	362273	0	0
550711	cg20307368	chr15	52040296	+	0.839895	0.819277	0.0206189	0.0354321	0.00237223	0.881142	0.78691	0.0306721	0.897737	0.706135	0.0478846	0	0.915406	214549	0	0
194953	cg09757838	chr4	148605817	-	0.0119534	0.0155895	-0.00363609	-0.221107	0.00237239	0.0225809	0.00405622	0.00457125	0.0247544	0.00477334	0.00546596	0	0.915406	352163	0	0
213711	cg02577849	chr5	64777678	+	0.0045986	0.00551218	-0.000913572	-0.0875707	0.00237409	0.0103843	0.000791902	0.00260972	0.0186934	0.00216097	0.00316179	0	0.915406	598388	0	0
429534	cg11976240	chr11	34018765	-	0.00686271	0.00875589	-0.00189318	-0.153507	0.00237465	0.015425	0.00191771	0.00342884	0.0176203	0.00315271	0.00315325	0	0.915406	484809	0	0
475457	cg23197405	chr12	54451938	-	0.614023	0.548056	0.0659674	0.16119	0.00237674	0.775519	0.446695	0.0978118	0.735198	0.260085	0.107979	0	0.915406	43503	0	0
294299	cg12516528	chr7	21986445	+	0.918733	0.892884	0.0258485	0.0407224	0.00237741	0.947955	0.860924	0.0249795	0.951457	0.666837	0.0588228	0	0.915406	197095	0	0
439166	cg08296831	chr11	65554175	+	0.0448424	0.0377187	0.00712368	0.200736	0.00237867	0.077384	0.025345	0.011083	0.0639138	0.0172837	0.0113816	0	0.915406	216804	0	0
504341	cg05401522	chr13	41885092	-	0.00972441	0.0116273	-0.00190288	-0.132871	0.00237869	0.0415611	2.92877e-05	0.0100716	0.0490161	0.000336879	0.0113936	0	0.915406	483867	0	0
273284	cg18668813	chr6	114177341	-	0.0367371	0.045573	-0.00883588	-0.249815	0.00237984	0.158062	0.0155389	0.0275515	0.120879	0.0138473	0.0232781	0	0.915406	176970	0	0
17617	cg08467760	chr1	29449845	+	0.0679097	0.080698	-0.0127884	-0.219269	0.00238131	0.140769	0.0376889	0.0231958	0.110165	0.0297093	0.01687	0	0.915406	115976	0	0
394073	cg06209897	chr10	53635551	+	0.195398	0.287808	-0.0924105	-0.535964	0.00238222	0.421279	0.0646509	0.0968376	0.526252	0.100341	0.109435	0	0.915406	1842	0	0
718096	cg13657092	chr22	26986419	+	0.0175167	0.0203309	-0.00281415	-0.140478	0.00238334	0.037566	0.00799898	0.00704179	0.0337616	0.00920767	0.00658072	0	0.915406	405834	0	0
566329	cg24198067	chr15	99650312	-	0.954537	0.945138	0.00939932	0.0141279	0.00238471	0.983672	0.916677	0.0131992	0.974251	0.88636	0.0200096	0	0.915406	343498	0	0
489123	cg07574908	chr12	112765649	+	0.906613	0.914328	-0.00771468	-0.0120916	0.00238584	0.955197	0.851694	0.0262583	0.968264	0.848082	0.0262253	0	0.915406	367740	0	0
68336	cg13088206	chr1	236958344	+	0.00415686	0.00497482	-0.00081796	-0.0810374	0.00238593	0.00840609	0.00188906	0.00183633	0.00970361	0.00117842	0.00211701	0	0.915406	611462	0	0
604662	cg20354430	chr17	6735116	-	0.0272736	0.0302713	-0.00299771	-0.111598	0.00238605	0.0382362	0.0163763	0.00610434	0.0436547	0.0160909	0.00776157	0	0.915406	392555	0	0
296941	cg07891179	chr7	29923883	-	0.27111	0.241172	0.0299384	0.162461	0.00238614	0.434173	0.1302	0.0724745	0.607293	0.0840177	0.106833	0	0.915406	42892	0	0
403413	cg12849335	chr10	96305254	-	0.00568482	0.00766107	-0.00197625	-0.171204	0.00238644	0.0132633	0.000890967	0.0031429	0.0171985	0.000919978	0.00400805	0	0.915406	476577	0	0
561276	cg21250931	chr15	81624928	-	0.862611	0.916933	-0.0543224	-0.0871271	0.00238722	0.952547	0.36864	0.165047	0.967762	0.479227	0.0755699	0	0.915406	104488	0	0
301396	cg11811897	chr7	47811084	-	0.948883	0.924226	0.0246571	0.0375833	0.00238762	0.983792	0.866736	0.023723	0.973794	0.510891	0.0826442	0	0.915406	206976	0	0
4913	cg27267361	chr1	6068268	-	0.958706	0.96344	-0.00473389	-0.00703302	0.00239016	0.978171	0.935627	0.0106567	0.988587	0.929296	0.0122704	0	0.915406	455430	0	0
681276	cg14824035	chr19	54024219	-	0.0139139	0.0169397	-0.00302583	-0.171886	0.00239169	0.0249867	0.00490772	0.00565131	0.0324597	0.00547144	0.00775922	0	0.915406	390651	0	0
707287	cg07316147	chr21	33708289	-	0.836739	0.863762	-0.0270223	-0.0453219	0.0023942	0.916481	0.773262	0.0356977	0.941666	0.791895	0.032132	0	0.915406	183897	0	0
729828	cg11676382	chr22	51141829	+	0.974832	0.979294	-0.00446203	-0.00652173	0.00239434	0.987074	0.960598	0.00754766	0.987296	0.96141	0.00654888	0	0.915406	467530	0	0
131932	cg24159436	chr3	16974681	+	0.446065	0.390591	0.0554743	0.18711	0.00239565	0.557436	0.259192	0.0698958	0.545017	0.252243	0.0826492	0	0.915406	32744	0	0
161854	cg03591690	chr3	166884766	+	0.944183	0.961507	-0.0173236	-0.0259578	0.00239617	0.978696	0.755063	0.0420261	0.989705	0.914055	0.0169511	0	0.915406	255172	0	0
105295	cg03953709	chr2	157189668	-	0.0232607	0.0276299	-0.00436922	-0.178062	0.00239754	0.0615727	0.00733675	0.0121988	0.0727349	0.00634443	0.0158164	0	0.915406	314411	0	0
156136	cg23093151	chr3	134755785	-	0.821789	0.786803	0.0349858	0.0619942	0.00239935	0.907984	0.751768	0.0487699	0.887055	0.573915	0.068328	0	0.915406	145358	0	0
582332	cg20592286	chr16	34730922	+	0.326097	0.278382	0.0477151	0.220897	0.00240042	0.433827	0.17955	0.0718115	0.498532	0.0532839	0.11455	0	0.915406	22511	0	0
52734	cg05009066	chr1	179198964	+	0.0228561	0.0273838	-0.00452773	-0.186253	0.00240109	0.033931	0.00751525	0.00677588	0.0459273	0.0151016	0.00802114	0	0.915406	307050	0	0
647748	cg08933584	chr18	56751428	+	0.025059	0.0294862	-0.00442723	-0.171565	0.00240461	0.0823648	0.00898494	0.0154035	0.0648263	0.0101908	0.0137552	0	0.915406	311663	0	0
264884	cg17826236	chr6	50055768	+	0.548856	0.487737	0.0611197	0.167095	0.00240887	0.711908	0.35604	0.0850579	0.663194	0.182016	0.0984681	0	0.915406	40668	0	0
490257	cg09265016	chr12	115170515	-	0.668864	0.627748	0.0411162	0.0901365	0.00240894	0.871811	0.423271	0.114921	0.841339	0.215606	0.12338	0	0.915406	100567	0	0
59447	cg09169516	chr1	206867473	-	0.964274	0.970728	-0.00645344	-0.00952467	0.00240989	0.978245	0.945285	0.0103145	0.994444	0.937898	0.0110599	0	0.915406	405937	0	0
83572	cg07661882	chr2	44211862	+	0.25134	0.314774	-0.0634337	-0.313507	0.00240994	0.469043	0.141532	0.0988236	0.620828	0.116022	0.108478	0	0.915406	7521	0	0
607269	cg18664658	chr17	9864057	-	0.922716	0.933634	-0.010918	-0.0167896	0.00241047	0.957483	0.870649	0.0213212	0.962132	0.891929	0.0151792	0	0.915406	317268	0	0
146632	cg04774620	chr3	78765904	+	0.957559	0.953137	0.00442257	0.00660946	0.00241171	0.987335	0.915538	0.0152129	0.978808	0.918282	0.0118467	0	0.915406	465426	0	0
348435	cg15741204	chr8	108227632	-	0.903363	0.918421	-0.0150576	-0.0235902	0.0024121	0.946287	0.815328	0.0317255	0.964925	0.782932	0.0324178	0	0.915406	268218	0	0
57735	cg26894354	chr1	203311314	-	0.353141	0.322046	0.0310953	0.129148	0.00241336	0.453832	0.234778	0.0575938	0.444012	0.156569	0.0669363	0	0.915406	62626	0	0
698529	cg11308603	chr20	48136525	+	0.928351	0.891823	0.0365281	0.0572835	0.00241729	0.965039	0.885105	0.0247573	0.971415	0.682626	0.0599936	0	0.915406	154978	0	0
593010	cg26899625	chr16	81027024	+	0.940411	0.955379	-0.0149684	-0.0225446	0.00241795	0.974073	0.882521	0.0219118	0.989353	0.896638	0.0197151	0	0.915406	274422	0	0
242598	cg08268148	chr6	4004820	+	0.749911	0.783627	-0.0337156	-0.0626299	0.00241809	0.861224	0.641274	0.0526796	0.887495	0.638548	0.0623249	0	0.915406	144094	0	0
718204	cg25327534	chr22	27218560	+	0.239605	0.186264	0.0533414	0.346854	0.00241961	0.475438	0.0850535	0.10338	0.338094	0.0640283	0.0615351	0	0.915406	5004	0	0
672266	cg00323695	chr19	39989978	-	0.0598065	0.0714502	-0.0116437	-0.222558	0.0024201	0.128578	0.023171	0.0226109	0.145718	0.0368849	0.0248561	0	0.915406	130395	0	0
463108	cg10899006	chr12	6580392	-	0.0121934	0.0163605	-0.00416708	-0.248246	0.00242145	0.0207254	0.00328308	0.00478575	0.0272288	0.0058646	0.0054214	0	0.915406	323955	0	0
23500	cg12127455	chr1	42802952	-	0.920359	0.92839	-0.00803098	-0.0124001	0.00242166	0.959417	0.870658	0.0219206	0.969623	0.847708	0.0239978	0	0.915406	363777	0	0
278568	cg05215536	chr6	144164325	+	0.0374654	0.0456425	-0.00817711	-0.229311	0.00242479	0.0671785	0.0159394	0.0126295	0.0786268	0.0223077	0.0125247	0	0.915406	191122	0	0
666700	cg19349283	chr19	19339362	-	0.653147	0.613504	0.0396432	0.0889304	0.00242536	0.764572	0.48542	0.084871	0.765867	0.457124	0.0835263	0	0.915406	102131	0	0
14171	cg07212628	chr1	23811846	-	0.944287	0.965097	-0.0208103	-0.031123	0.00242727	0.982328	0.815603	0.0394446	0.986782	0.930654	0.014828	0	0.915406	231273	0	0
120273	cg15161950	chr2	228666891	-	0.969197	0.962722	0.00647496	0.00957152	0.00242858	0.998034	0.935045	0.0128944	0.987703	0.920589	0.0138437	0	0.915406	405108	0	0
395092	cg13393433	chr10	63525851	-	0.113693	0.129557	-0.0158648	-0.174099	0.00243062	0.30373	0.0489148	0.0562214	0.25319	0.0512751	0.0557865	0	0.915406	86162	0	0
551055	cg20941534	chr15	52821917	-	0.0113768	0.0127449	-0.00136804	-0.0894933	0.00243093	0.0242673	0.00345337	0.00509147	0.0275243	0.00406225	0.00534208	0	0.915406	541493	0	0
162927	cg17566735	chr3	171527257	+	0.0540643	0.0715917	-0.0175274	-0.348901	0.00243637	0.137743	0.0166488	0.0257887	0.268086	0.0155824	0.0446359	0	0.915406	73989	0	0
629157	cg14041840	chr17	71596597	+	0.944596	0.95547	-0.0108742	-0.0163415	0.00243671	0.964324	0.911971	0.011445	0.994298	0.937614	0.0139004	0	0.915406	321410	0	0
534804	cg01848293	chr14	91861467	+	0.930806	0.94155	-0.010744	-0.0163822	0.00243917	0.962728	0.894989	0.0170309	0.981441	0.902197	0.017002	0	0.915406	321012	0	0
112798	cg01976035	chr2	197848776	-	0.144323	0.187373	-0.0430495	-0.354968	0.00244084	0.348035	0.0186479	0.0912305	0.628865	0.0319383	0.115676	0	0.915406	6899	0	0
534782	cg09262217	chr14	91819321	-	0.956252	0.940164	0.0160883	0.0242234	0.00244159	0.9761	0.919663	0.0152858	0.972513	0.752768	0.0351811	0	0.915406	264587	0	0
192396	cg25442239	chr4	128553912	-	0.00699966	0.00900782	-0.00200816	-0.161087	0.0024419	0.0207812	0.000316282	0.00503868	0.0253667	0.00123204	0.00534673	0	0.915406	473414	0	0
348342	cg10066109	chr8	107447147	+	0.442907	0.332419	0.110488	0.403452	0.00244515	0.789411	0.128699	0.156519	0.615839	0.174758	0.101475	0	0.915406	2539	0	0
632704	cg05767562	chr17	76227422	-	0.617623	0.590473	0.0271506	0.0638002	0.00244647	0.720577	0.479183	0.0736041	0.701202	0.420181	0.0685657	0	0.915406	141799	0	0
539929	cg14411859	chr14	102829041	+	0.0424446	0.0593458	-0.0169011	-0.403013	0.00244798	0.0703505	0.0119219	0.0159046	0.102694	0.01329	0.0219366	0	0.915406	78296	0	0
565799	cg22720096	chr15	97325013	-	0.438234	0.385562	0.0526724	0.18035	0.00244869	0.584264	0.331816	0.0714365	0.539214	0.104344	0.0894959	0	0.915406	35207	0	0
551974	cg08413196	chr15	57946501	-	0.962394	0.952526	0.00986745	0.0147147	0.0024492	0.987155	0.942678	0.0124987	0.979378	0.851381	0.020547	0	0.915406	337368	0	0
13668	cg01628425	chr1	22902537	-	0.0170164	0.0249448	-0.00792835	-0.37124	0.00244936	0.0281015	0.00358193	0.00669274	0.061339	0.0053166	0.0144559	0	0.915406	196815	0	0
130370	cg23336797	chr3	13114570	-	0.353575	0.317796	0.0357793	0.149456	0.0024494	0.571124	0.229914	0.0771171	0.432296	0.166222	0.0596479	0	0.915406	49610	0	0
164724	cg27368333	chr3	182677779	+	0.111501	0.140148	-0.0286469	-0.305416	0.00245062	0.263736	0.0385098	0.0633035	0.446796	0.0217508	0.0744942	0	0.915406	27327	0	0
367296	cg19853984	chr9	95571654	-	0.0232305	0.0267528	-0.00352224	-0.145344	0.00245102	0.0429132	0.00846167	0.00961364	0.0430422	0.0112369	0.00859856	0	0.915406	358798	0	0
428232	cg01642653	chr11	27743476	+	0.0441501	0.0541155	-0.00996538	-0.243709	0.00245372	0.0706054	0.0271922	0.0130366	0.119868	0.0218721	0.0166616	0	0.915406	156121	0	0
266753	cg23032674	chr6	70992911	+	0.113723	0.144145	-0.0304214	-0.317167	0.00245405	0.244422	0.0652274	0.0404078	0.400126	0.0759387	0.0662988	0	0.915406	23294	0	0
419574	cg11908547	chr11	1610649	-	0.0153137	0.0213568	-0.00604309	-0.308859	0.00245478	0.02576	0.00481697	0.00475746	0.0454922	0.0046429	0.00782793	0	0.915406	248609	0	0
586918	cg16882054	chr16	62222536	+	0.634245	0.602556	0.0316882	0.0727659	0.00245514	0.74821	0.47579	0.0776265	0.717942	0.483563	0.0716121	0	0.915406	125832	0	0
200263	cg11118801	chr4	185304985	+	0.769152	0.727856	0.0412959	0.0785653	0.0024559	0.888683	0.601912	0.0768121	0.850491	0.412291	0.0881568	0	0.915406	116723	0	0
134691	cg12863028	chr3	36826004	-	0.902707	0.934069	-0.0313623	-0.048741	0.00245768	0.985188	0.63535	0.0775792	0.97691	0.67225	0.0547619	0	0.915406	174789	0	0
560860	cg13726901	chr15	80695990	+	0.850322	0.808627	0.0416946	0.0716698	0.00245789	0.915391	0.732983	0.0432433	0.920297	0.483803	0.0799198	0	0.915406	127641	0	0
554043	cg00365880	chr15	64647465	+	0.0461999	0.0655616	-0.0193616	-0.427084	0.00245906	0.0905992	0.0136829	0.0211118	0.220581	0.0200093	0.0342582	0	0.915406	62829	0	0
339286	cg06704573	chr8	55527950	+	0.841192	0.825171	0.016021	0.0274129	0.00245984	0.915068	0.755808	0.0428987	0.886114	0.638333	0.0478189	0	0.915406	247931	0	0
591621	cg09231120	chr16	74991307	-	0.929192	0.937654	-0.008462	-0.0129403	0.00246098	0.943727	0.905515	0.00990936	0.959917	0.899329	0.0150873	0	0.915406	357164	0	0
637593	cg05613273	chr17	80419874	-	0.933688	0.941497	-0.00780936	-0.0118897	0.00246267	0.977607	0.885505	0.0205653	0.974019	0.893284	0.0210007	0	0.915406	370411	0	0
714107	cg13271076	chr21	48055715	-	0.0189784	0.0223801	-0.0034017	-0.16013	0.00246529	0.0305653	0.00886829	0.00576595	0.0328905	0.0147828	0.00431078	0	0.915406	366196	0	0
61668	cg01770831	chr1	214454661	+	0.0414797	0.053671	-0.0121913	-0.306634	0.00246535	0.0763323	0.0176991	0.0129719	0.0983838	0.0220047	0.0186709	0	0.915406	123146	0	0
517827	cg04124916	chr14	21755820	+	0.977202	0.970367	0.00683481	0.0100231	0.00246551	0.987265	0.960979	0.00758307	0.986649	0.939865	0.0101942	0	0.915406	397598	0	0
76140	cg04609952	chr2	16085893	+	0.70861	0.777584	-0.0689738	-0.132224	0.00246553	0.842899	0.470507	0.102262	0.943837	0.535076	0.0946681	0	0.915406	60420	0	0
10052	cg01769457	chr1	15930094	-	0.0141258	0.0157857	-0.00165984	-0.0959909	0.00246686	0.038177	0.00557797	0.00719694	0.0565306	0.00752126	0.00867232	0	0.915406	508706	0	0
67396	cg13023668	chr1	234668366	-	0.169993	0.214987	-0.0449942	-0.321903	0.0024673	0.340653	0.0539566	0.0787978	0.578981	0.0402554	0.104331	0	0.915406	6772	0	0
330288	cg20580985	chr8	17272232	-	0.509004	0.420549	0.0884545	0.269567	0.00246976	0.692626	0.242367	0.0984849	0.637586	0.0627573	0.124483	0	0.915406	12651	0	0
15226	cg00975854	chr1	25574317	-	0.0132445	0.015697	-0.00245249	-0.14471	0.00247001	0.0234679	0.0044279	0.00464621	0.0339528	0.00382124	0.00646295	0	0.915406	434015	0	0
276938	cg20443946	chr6	136729655	-	0.316619	0.303542	0.0130775	0.0589524	0.00247163	0.46055	0.196093	0.060733	0.552834	0.184069	0.0692592	0	0.915406	151515	0	0
53061	cg05429955	chr1	180200924	-	0.0147574	0.0174766	-0.00271914	-0.15034	0.00247241	0.0230961	0.00730728	0.00405095	0.0358718	0.00758774	0.00637586	0	0.915406	412920	0	0
430781	cg19809735	chr11	43380484	-	0.00944287	0.0116776	-0.00223477	-0.156967	0.00247296	0.0208861	0.002258	0.00476425	0.0199059	0.00423953	0.0035733	0	0.915406	452504	0	0
689666	cg17613729	chr20	20724371	-	0.096304	0.123234	-0.0269299	-0.325766	0.00247502	0.217687	0.017109	0.0540351	0.428	0.0273321	0.0744431	0	0.915406	31949	0	0
109020	cg09344183	chr2	175205785	+	0.0315219	0.0388188	-0.00729692	-0.233565	0.00247544	0.0923189	0.0119608	0.0177051	0.11713	0.0131854	0.0207564	0	0.915406	212215	0	0
698289	cg25380214	chr20	47448621	-	0.120586	0.147956	-0.0273696	-0.274518	0.00247595	0.343704	0.0304392	0.0802503	0.407614	0.0278402	0.0761509	0	0.915406	30727	0	0
99767	cg03973036	chr2	121071002	+	0.0108166	0.0127458	-0.00192912	-0.127861	0.00247614	0.0220671	0.00506327	0.00419416	0.0236955	0.00414664	0.00476712	0	0.915406	481241	0	0
276086	cg16484401	chr6	133188400	+	0.490236	0.462952	0.0272841	0.0809154	0.00247821	0.579059	0.393554	0.0563303	0.641833	0.344505	0.0665638	0	0.915406	113279	0	0
81649	cg07511565	chr2	37423361	+	0.192898	0.147404	0.0454938	0.366281	0.0024798	0.344863	0.0632029	0.0726769	0.321531	0.0455905	0.0608159	0	0.915406	5546	0	0
57195	cg13673568	chr1	202252805	+	0.0148512	0.018246	-0.00339485	-0.184734	0.00248009	0.0285587	0.00165342	0.00704822	0.0426567	0.00537686	0.00767597	0	0.915406	366618	0	0
300530	cg24768921	chr7	44787805	+	0.0192786	0.0238692	-0.00459056	-0.210126	0.00248099	0.0583954	0.00168278	0.0107932	0.0485038	0.00972842	0.00948086	0	0.915406	304246	0	0
86661	cg00823094	chr2	60771364	+	0.156347	0.197133	-0.0407853	-0.316356	0.00248216	0.317087	0.0446605	0.0816526	0.597238	0.0209015	0.106543	0	0.915406	8542	0	0
677548	cg11998619	chr19	48364243	+	0.781744	0.733298	0.0484457	0.0910928	0.00248284	0.898464	0.620596	0.0669508	0.882238	0.445294	0.10277	0	0.915406	99369	0	0
25674	cg22694153	chr1	46768912	+	0.0148427	0.0183407	-0.003498	-0.190054	0.00248751	0.0349916	0.00310463	0.00654644	0.0313373	0.00365408	0.00542148	0	0.915406	360184	0	0
57951	cg16020436	chr1	203763483	-	0.953084	0.957841	-0.0047562	-0.00710722	0.00248802	0.976208	0.916744	0.013092	0.986805	0.916411	0.0138935	0	0.915406	453699	0	0
662907	cg09952620	chr19	13885098	-	0.0184407	0.0259214	-0.00748075	-0.336889	0.00248859	0.0476956	0.00423441	0.0102459	0.0521026	0.00604242	0.0123686	0	0.915406	207591	0	0
598772	cg04741281	chr16	89269422	-	0.927712	0.952457	-0.0247451	-0.0375773	0.00248961	0.968489	0.760825	0.0540112	0.978268	0.863914	0.025095	0	0.915406	206997	0	0
688208	cg00149716	chr20	13200069	-	0.253061	0.323432	-0.0703705	-0.341993	0.00249018	0.430335	0.137502	0.0672446	0.605374	0.175037	0.100707	0	0.915406	5297	0	0
347922	cg20548043	chr8	104426639	+	0.025538	0.0360479	-0.0105099	-0.373773	0.00249343	0.0613808	0.00772441	0.0125549	0.113411	0.000640598	0.0214008	0	0.915406	147059	0	0
428698	cg05637510	chr11	31732880	-	0.72017	0.696778	0.0233922	0.0469757	0.00249458	0.854202	0.522402	0.0895727	0.807024	0.466189	0.0753474	0	0.915406	179426	0	0
539797	cg11213746	chr14	102673481	+	0.931999	0.938825	-0.00682602	-0.0104165	0.00249565	0.960918	0.895914	0.0141059	0.971567	0.89516	0.0154662	0	0.915406	391515	0	0
265930	cg19318364	chr6	55774999	-	0.643807	0.816025	-0.172218	-0.337321	0.00249591	0.887781	0.188898	0.244952	0.944672	0.370006	0.126988	0	0.915406	5617	0	0
376377	cg26672426	chr9	132514582	+	0.679231	0.65999	0.0192411	0.0408483	0.0024989	0.756983	0.566591	0.0499669	0.770799	0.489308	0.067	0	0.915406	196718	0	0
590426	cg22428448	chr16	71378633	-	0.600232	0.549409	0.0508227	0.125454	0.00250004	0.810829	0.347972	0.117855	0.719206	0.342841	0.0957346	0	0.915406	65394	0	0
638844	cg25278153	chr18	1805667	+	0.333037	0.390188	-0.0571505	-0.222312	0.00250152	0.527133	0.161668	0.0944004	0.674092	0.198686	0.0916716	0	0.915406	22120	0	0
329785	cg02066009	chr8	12808691	-	0.0386064	0.0486208	-0.0100144	-0.270265	0.00250362	0.080052	0.00569034	0.0211713	0.115355	0.00822482	0.0266596	0	0.915406	155239	0	0
184609	cg25898162	chr4	75023005	+	0.0600453	0.0788967	-0.0188513	-0.343841	0.00250562	0.169468	0.00953695	0.0394735	0.329629	0.0235522	0.0548089	0	0.915406	65714	0	0
427142	cg22855325	chr11	19368277	+	0.064791	0.081436	-0.0166451	-0.289899	0.002506	0.148719	0.0106038	0.031993	0.180293	0.0363304	0.0304765	0	0.915406	80104	0	0
364550	cg04800984	chr9	74907525	+	0.146025	0.190528	-0.0445035	-0.36203	0.00250735	0.277372	0.0655701	0.0562328	0.500888	0.0890572	0.0861869	0	0.915406	6043	0	0
702151	cg14915838	chr20	58411980	+	0.70222	0.749569	-0.0473491	-0.0928584	0.0025077	0.833819	0.559665	0.0789459	0.848144	0.524811	0.0860709	0	0.915406	97137	0	0
287554	cg26052728	chr7	961841	+	0.479318	0.286459	0.192859	0.722941	0.00250999	0.753535	0.0511843	0.241561	0.742775	0.040128	0.252666	0	0.915406	1948	0	0
608156	cg14455211	chr17	14627797	+	0.962936	0.970326	-0.00738939	-0.0109158	0.0025133	0.975784	0.924917	0.0110821	0.99601	0.938178	0.0121628	0	0.915406	383993	0	0
207411	cg05279859	chr5	17238567	+	0.923481	0.935468	-0.0119876	-0.0184088	0.002515	0.973656	0.845815	0.0292573	0.982941	0.879892	0.0226293	0	0.915406	303587	0	0
642619	cg17917181	chr18	22597188	+	0.953724	0.960938	-0.00721448	-0.0107599	0.00251626	0.972434	0.934632	0.0102585	0.978453	0.938091	0.0095136	0	0.915406	386311	0	0
209651	cg26789779	chr5	37839943	-	0.0241387	0.0244705	-0.000331765	-0.0139526	0.00251662	0.106848	0.00327273	0.0204721	0.0646449	0.0091028	0.0131625	0	0.915406	680750	0	0
566753	cg04614741	chr15	100913030	-	0.0629857	0.0828617	-0.0198759	-0.347469	0.00251726	0.166916	0.0168865	0.0375416	0.184854	0.0324504	0.0328226	0	0.915406	60088	0	0
240950	cg05064044	chr6	292385	+	0.38032	0.519982	-0.139662	-0.441284	0.00251749	0.723352	0.0275074	0.24549	0.709784	0.0330588	0.160234	0	0.915406	1954	0	0
240949	cg18110333	chr6	292329	+	0.374573	0.511296	-0.136723	-0.438846	0.00251936	0.654637	0.0075851	0.250246	0.655177	0.00761119	0.158144	0	0.915406	1955	0	0
542687	cg04991452	chr14	106306929	-	0.841118	0.828844	0.0122735	0.0209558	0.0025207	0.918736	0.750969	0.0458049	0.895967	0.741415	0.0362432	0	0.915406	284601	0	0
27124	cg18381573	chr1	52042032	-	0.92977	0.947737	-0.0179667	-0.0273214	0.00252184	0.967374	0.729129	0.0439985	0.974122	0.898613	0.0150811	0	0.915406	248357	0	0
680054	cg02927373	chr19	51347703	-	0.792487	0.86615	-0.0736626	-0.126699	0.00252297	0.915819	0.547051	0.115501	0.973908	0.70435	0.073616	0	0.915406	64461	0	0
162240	cg22827719	chr3	169345735	+	0.751247	0.681003	0.0702441	0.139673	0.00252321	0.918321	0.51436	0.103814	0.901253	0.386743	0.11678	0	0.915406	55492	0	0
10456	cg10312679	chr1	16442379	-	0.273441	0.246837	0.0266041	0.142196	0.00252444	0.45278	0.155137	0.0757231	0.394644	0.12773	0.0622043	0	0.915406	53859	0	0
258729	cg08914800	chr6	33489324	-	0.920806	0.936211	-0.0154043	-0.0236804	0.00252739	0.95123	0.829431	0.025355	0.970592	0.864333	0.0215813	0	0.915406	267681	0	0
470902	cg15321306	chr12	46918065	+	0.797671	0.769777	0.0278941	0.0507063	0.00252928	0.921824	0.585458	0.0816349	0.909146	0.52129	0.0745642	0	0.915406	169902	0	0
85400	cg03168108	chr2	51259697	+	0.0317315	0.0549073	-0.0231757	-0.637242	0.00253087	0.0868758	0.0104875	0.0155349	0.400078	0.0138464	0.0795121	0	0.915406	44658	0	0
143056	cg23670415	chr3	57583409	-	0.0127293	0.01521	-0.00248073	-0.149445	0.00253325	0.0297721	0.00374467	0.00702981	0.0445281	0.00121222	0.00739293	0	0.915406	431709	0	0
677223	cg03079219	chr19	47918212	-	0.676593	0.731055	-0.0544622	-0.110126	0.00253426	0.833872	0.53908	0.0852301	0.935269	0.346114	0.125509	0	0.915406	78354	0	0
660553	cg00522555	chr19	10602587	-	0.983072	0.985403	-0.00233073	-0.00338202	0.00253798	0.988979	0.977056	0.00348808	0.991977	0.978301	0.00313139	0	0.915406	566636	0	0
205276	cg06495547	chr5	6578707	-	0.72195	0.703892	0.0180578	0.0360389	0.00253874	0.819947	0.577063	0.0545805	0.820866	0.456792	0.0672077	0	0.915406	212402	0	0
470332	cg17459298	chr12	43946341	-	0.0340771	0.0429402	-0.00886316	-0.264336	0.00253917	0.0769018	0.0140194	0.0130691	0.0761936	0.017457	0.0148406	0	0.915406	176448	0	0
305073	cg06524546	chr7	75508288	-	0.00649681	0.00892034	-0.00242353	-0.197751	0.00254127	0.013943	0.000854377	0.0037462	0.0207837	0.00212486	0.00434583	0	0.915406	436319	0	0
166604	cg17641914	chr3	186525444	-	0.804914	0.826522	-0.0216079	-0.0377555	0.00254173	0.925834	0.700725	0.0509897	0.913201	0.668556	0.0592759	0	0.915406	206409	0	0
391585	cg25122853	chr10	37422916	+	0.530926	0.613731	-0.0828056	-0.205494	0.0025425	0.768817	0.0932881	0.142594	0.826201	0.32746	0.115069	0	0.915406	26734	0	0
225070	cg00102176	chr5	132447023	-	0.0251394	0.0276718	-0.00253233	-0.100393	0.00254267	0.0462518	0.006326	0.0120694	0.0561262	0.00688252	0.0117199	0	0.915406	427527	0	0
548056	cg11968045	chr15	42282548	+	0.0478428	0.0588633	-0.0110205	-0.251598	0.00254522	0.0986186	0.0214584	0.016241	0.13989	0.0246797	0.0217127	0	0.915406	139274	0	0
314872	cg09542726	chr7	124402821	-	0.658056	0.633576	0.0244802	0.0538589	0.00254617	0.794202	0.505692	0.0790842	0.769935	0.447232	0.074146	0	0.915406	162384	0	0
671436	cg14254534	chr19	38883115	-	0.589604	0.561331	0.0282732	0.0696837	0.0025477	0.690874	0.477985	0.0675508	0.653393	0.242156	0.0817961	0	0.915406	131087	0	0
424081	cg13628373	chr11	9665451	-	0.150189	0.190611	-0.0404219	-0.324626	0.00254834	0.308935	0.0618626	0.0740654	0.510188	0.0522121	0.0933838	0	0.915406	8835	0	0
36895	cg11748666	chr1	101360371	-	0.0123796	0.0152651	-0.00288553	-0.174963	0.00254944	0.028589	0.00184037	0.00790622	0.0295556	0.00310507	0.00681273	0	0.915406	400617	0	0
682589	cg16737991	chr19	55876060	-	0.966626	0.973542	-0.00691625	-0.0101808	0.00254977	0.986105	0.933105	0.0134599	0.990267	0.94113	0.0112948	0	0.915406	395185	0	0
109721	cg00893471	chr2	177029921	-	0.0177656	0.0216657	-0.00390011	-0.189623	0.00254979	0.0470085	0.00463034	0.00927626	0.0576898	0.0071148	0.012051	0	0.915406	337786	0	0
109006	cg01269597	chr2	175200286	+	0.0261066	0.0381016	-0.011995	-0.413821	0.00255082	0.04927	0.006395	0.0107093	0.157832	0.011996	0.0244354	0	0.915406	125623	0	0
274354	cg12828610	chr6	122806040	+	0.203991	0.244565	-0.0405738	-0.250483	0.00255311	0.399807	0.0838978	0.0873657	0.599951	0.0874674	0.106557	0	0.915406	15909	0	0
685412	cg06052905	chr20	1722502	-	0.0701343	0.0868864	-0.0167521	-0.273874	0.0025533	0.174733	0.0167846	0.0419614	0.285453	0.0224303	0.0482193	0	0.915406	79338	0	0
706094	cg05796727	chr21	27011473	-	0.02631	0.0230636	0.00324635	0.135121	0.00255449	0.0398632	0.0159811	0.00595197	0.0351328	0.00702466	0.00686759	0	0.915406	375893	0	0
218266	cg26650655	chr5	88178400	-	0.00883157	0.0112559	-0.00242432	-0.17471	0.00255726	0.0207076	0.00214458	0.00530942	0.0246559	0.00243337	0.00466891	0	0.915406	436250	0	0
250173	cg22180958	chr6	29055509	+	0.63548	0.573508	0.0619718	0.145619	0.00255887	0.754715	0.477693	0.0653385	0.763653	0.25809	0.117879	0	0.915406	51814	0	0
710358	cg01208266	chr21	42953366	+	0.891957	0.917416	-0.0254588	-0.0401577	0.00255893	0.941531	0.666306	0.0591368	0.969419	0.81004	0.0370497	0	0.915406	198899	0	0
58359	cg20123452	chr1	204464079	+	0.0151694	0.0178501	-0.00268072	-0.146013	0.0025596	0.0271048	0.0075476	0.00446434	0.0283553	0.00834863	0.00468837	0	0.915406	415837	0	0
520863	cg00110776	chr14	32304341	+	0.907763	0.919119	-0.0113564	-0.0177423	0.00256393	0.934311	0.873118	0.0189093	0.967528	0.888226	0.0168114	0	0.915406	309074	0	0
284499	cg00426127	chr6	167461262	+	0.0258631	0.0287498	-0.00288668	-0.111688	0.00256554	0.0549638	0.00429263	0.0109173	0.0877365	0.00989039	0.0132623	0	0.915406	400530	0	0
670689	cg09567473	chr19	37329403	+	0.0129676	0.0153591	-0.00239152	-0.142904	0.00256566	0.0264511	0.00482076	0.00536307	0.033001	0.00533665	0.00674798	0	0.915406	439025	0	0
93208	cg05237932	chr2	87035710	+	0.0169424	0.0221029	-0.00516049	-0.252825	0.00256616	0.0433751	0.00116245	0.0100296	0.0433262	0.00476115	0.00927393	0	0.915406	280323	0	0
424546	cg18351805	chr11	10827563	-	0.711193	0.765455	-0.0542619	-0.104657	0.00256661	0.887483	0.509852	0.0854993	0.875977	0.514755	0.0939252	0	0.915406	83746	0	0
154015	cg15439915	chr3	127873114	-	0.0147335	0.0180482	-0.00331467	-0.18144	0.00256664	0.0289577	0.00658094	0.00492656	0.0321375	0.0079812	0.00597162	0	0.915406	371516	0	0
663337	cg02560973	chr19	14444344	-	0.0527156	0.0571237	-0.00440803	-0.0979963	0.00256693	0.133147	0.0175739	0.0222171	0.099058	0.0297454	0.0171896	0	0.915406	312548	0	0
441830	cg10606903	chr11	68664848	+	0.945415	0.961125	-0.0157106	-0.0235304	0.00256788	0.975501	0.732958	0.0453613	0.980008	0.942617	0.0104309	0	0.915406	268553	0	0
497500	cg12115397	chr12	132566291	-	0.880605	0.892622	-0.0120172	-0.0193366	0.00256938	0.930814	0.807334	0.0295638	0.947338	0.846692	0.0239059	0	0.915406	296402	0	0
456563	cg12393108	chr11	124064793	-	0.919186	0.899921	0.0192652	0.0302264	0.00257086	0.97117	0.800971	0.0437644	0.960016	0.671064	0.0535021	0	0.915406	235029	0	0
33221	cg12130328	chr1	82269019	-	0.0239099	0.0286831	-0.00477313	-0.189994	0.00257087	0.0987144	0.00704943	0.0195936	0.0712187	0.00624128	0.015219	0	0.915406	296171	0	0
[truncated: 3,002 more rows]
